# Supplementary material for: Choreography of the Transcriptome, Photophysiology, and Cell Cycle of a Minimal Photoautotroph, Prochlorococcus
Source: PLoS One. 2009 Apr 8;4(4):e5135. doi: 10.1371/journal.pone.0005135 (PMC2663038; doi:10.1371/journal.pone.0005135)
Supplement: Table S1 — Expression profiles of all MED4 probe sets. Open reading frames (“PMM####”) intergenic regions (“PMMIG…”) and non-coding RNAs (“PMM_…”) are listed in column 1, followed by annotations in column 3. PMM#### in column 1 are the annotations that were deposited in Genbank when MED4 was first sequenced [3]. Subsequently, with the sequencing of more Prochlorococcus strains, the genes have been renamed [2], and this new nomenclature is shown in column 2. Fourier score (column 4) and false discovery rate (FDR) for the score (column 5) are followed by calculated peak expression time (column 6) and calculated Pearson correlation with a (possibly) shifted cosine curve (column 7). Cluster assignment (column 8) and cluster membership (column 9) are followed by Cyanobase functional category (column 10) and sub-category (column 11) assignments. The final 100 columns list the mean RMA-normalized expression and the standard deviation of the mean of the 50 time points. (4.22 MB XLS) [file pone.0005135.s001.xls]

## Sheet: Sheet1
											time (hr)
											0	0	2	2	4	4	6	6	8	8	10	10	12	12	14	14	16	16	18	18	20	20	22	22	24	24	26	26	28	28	30	30	32	32	34	34	36	36	38
Gene or region	New gene name	Function	Fourier	FDR	Peak	Peak R value	Cluster	Cluster membership score	Cyanobase categories, main	Cyanobase sub-categories	Normalized	StdDev Norm	Normalized	StdDev Norm	Normalized	StdDev Norm	Normalized	StdDev Norm	Normalized	StdDev Norm	Normalized	StdDev Norm	Normalized	StdDev Norm	Normalized	StdDev Norm	Normalized	StdDev Norm	Normalized	StdDev Norm	Normalized	StdDev Norm	Normalized	StdDev Norm	Normalized	StdDev Norm	Normalized	StdDev Norm	Normalized	StdDev Norm	Normalized	StdDev Norm	Normalized	StdDev Norm	Normalized	StdDev Norm	Normalized	StdDev Norm	Normalized
PMM0001	PMED4_00001	dnaN DNA polymerase III, beta chain	16.0538	0.000470588	18.2	0.91716	5	0.672062	11.0 DNA replication, recombination, and repair	11.0 DNA replication, recombination, and repair	0.386336	0.0083232	0.367451	0.117888	0.966657	0.293532	1.5234	0.260029	1.58734	0.284311	1.89963	0.0278847	1.28067	0.140508	1.23677	0.168031	0.839586	0.106643	0.595439	0.0318137	0.556348	0.0801475	0.432858	0.048281	0.36809	0.13293	0.429484	0.107749	1.20944	0.191883	2.72269	0.220838	2.79979	0.356555	2.35265	0.0972992	1.71903	0.00218644	1.41664
PMM0002	PMED4_00011	conserved hypothetical protein	14.9615	0.00264271	18	0.855513	6	0.607842	16.0 Hypothetical	16.1 Conserved hypothetical protein	1.12459	0.161955	0.484989	0.0616788	0.891242	0.0010946	1.14989	0.152348	1.14058	0.339618	1.51478	0.0405125	1.55947	0.193613	1.23578	0.109628	0.988409	0.0706343	0.817336	0.304048	0.843958	0.145851	0.697982	0.0827373	0.712978	0.0926278	0.715431	0.111315	1.05916	0.110929	1.79101	0.145162	2.13654	0.0714038	1.64811	0.0751145	1.33516	0.22522	1.29473
PMM0003	PMED4_00021	purL phosphoribosylformylglycinamidine synthetase II	16.3318	0.000325733	18.4	0.93153	6	0.997901	9.0 Purines, pyrimidines, nucleosides, and nucleotides	9.2 Purine ribonucleotide biosynthesis	0.837679	0.0190581	0.613491	0.0584559	0.895246	0.00950867	1.13459	0.0261936	1.22141	0.545444	1.73371	0.0795981	1.59005	0.199858	1.35395	0.0812692	0.998993	0.0635008	0.831748	0.0779672	0.777358	0.0553667	0.729117	0.0357891	0.791266	0.0870823	0.710367	0.0346302	1.05361	0.00444035	1.70719	0.0624442	1.91325	0.130053	1.92523	0.141574	1.66335	0.15765	1.38322
PMM0004	PMED4_00031	purF Glutamine amidotransferaseclass-II	14.9614	0.00263992	21.8	0.854838	9	0.767819	9.0 Purines, pyrimidines, nucleosides, and nucleotides	9.2 Purine ribonucleotide biosynthesis	1.0357	0.17599	0.681687	0.020902	0.814499	0.0132207	0.800175	0.0622398	0.767206	0.390703	0.996766	0.0302986	1.34487	0.0828503	1.38558	0.139046	1.13134	0.0879513	0.998174	0.0597395	0.98582	0.0898409	0.87089	0.0236141	0.861126	0.0269508	0.774937	0.00909028	0.921295	0.0558794	1.03308	0.204332	1.15351	0.00619763	1.12206	0.0379459	1.22049	0.00206958	1.36828
PMM0005	PMED4_00041	DNA gyrase/topoisomerase IV, subunit A	15.931	0.000421053	18	0.911298	6	0.63147	11.0 DNA replication, recombination, and repair	11.0 DNA replication, recombination, and repair	0.684406	0.0347904	0.60909	0.0180419	0.891863	0.039788	1.38859	0.00263571	1.45328	0.504588	2.27829	0.0422921	1.6654	0.25491	1.1762	0.0112773	0.887648	0.0380862	0.788245	0.0431775	0.793364	0.103968	0.716268	0.0484076	0.707089	0.0136984	0.548086	0.035652	1.12232	0.0535195	2.29479	0.115336	2.52083	0.214322	2.71114	0.0626679	2.13695	0.226576	1.31096
PMM0006	PMED4_00051	conserved hypothetical protein	15.224	0.000952381	18.8	0.866182	6	0.972469	16.0 Hypothetical	16.1 Conserved hypothetical protein	0.776907	0.0690624	0.429453	0.0211819	0.833122	0.0108601	1.12318	0.109705	1.15622	0.505439	1.60859	0.060545	1.47295	0.159782	1.33879	0.0570496	0.990935	0.0289374	0.870902	0.157125	0.76056	0.150644	0.692928	0.0896216	0.740943	2.49827e-07	0.635279	0.0094071	1.06757	0.00941665	1.83985	0.0165363	2.04484	0.148707	1.66832	0.124388	1.51778	0.0795305	1.38097
PMM0007	PMED4_00061	conserved hypothetical protein	13.6297	0.015113	19.6	0.773124	8	0.439105	16.0 Hypothetical	16.1 Conserved hypothetical protein	0.825266	0.189571	0.540912	0.0941551	0.631968	0.106732	0.887206	0.0820318	1.0012	0.119499	1.30454	0.102038	1.40746	0.220738	1.3274	0.338645	0.95576	0.180923	0.92547	0.119897	1.02415	0.057058	0.879983	0.089078	0.734977	0.0653182	0.785757	0.105588	1.00979	0.0475472	1.85273	0.114102	1.8126	0.111881	1.62071	0.0865219	1.45744	0.0972809	1.29974
PMM0008	PMED4_00071	conserved hypothetical protein	15.4488	0.000824176	18.8	0.879043	6	0.949066	16.0 Hypothetical	16.1 Conserved hypothetical protein	0.906244	0.0689897	0.638453	0.113401	0.865766	0.143181	1.34665	0.257288	1.22607	0.274358	1.54289	0.302903	1.44518	0.0201197	1.3163	0.045379	0.972825	0.0650804	0.870982	1.3821e-05	0.878315	0.0359366	0.860009	0.010732	0.807005	0.119318	0.628998	0.0842782	1.01704	0.108753	1.47076	0.0961155	1.49404	0.0901036	1.42886	0.151006	1.43234	0.103189	1.15393
PMM0009	PMED4_00081	nusB Antitermination protein NusB	14.9987	0.00246253	20.2	0.850386	7	0.694454	12.0 Transcription	12.2 RNA synthesis, modification, and DNA transcription	0.97091	0.0889664	0.609994	0.0261816	0.692486	0.0558255	0.964998	0.0961944	0.798866	0.504113	1.31251	0.0976571	1.34128	0.133288	1.19893	0.0561177	1.09323	0.0450584	0.897154	0.0314873	0.944319	0.118681	0.91325	0.06836	0.726508	0.0224233	0.603003	0.083526	0.878371	0.182368	1.23554	0.140606	1.18477	0.316002	1.32547	0.334962	1.22982	0.0710827	1.2071
PMM0010	PMED4_00091	ftsY signal recognition particle docking protein FtsY	14.5498	0.00536972	19.4	0.825718	6	0.654254	4.0 Cellular processes	4.1 Cell division	0.905203	0.0824621	0.761	0.0189288	0.825336	0.125555	0.87511	0.0516819	0.894723	0.324134	1.37143	0.00809594	1.28436	0.22948	1.30733	0.0128817	0.995331	0.0101133	1.06984	0.171491	0.992995	0.00634702	0.905131	0.00507776	0.768956	0.137633	0.646961	0.175231	1.01113	0.110339	1.42653	0.185853	1.57433	0.191725	1.39774	0.0805526	1.33861	0.14928	1.25852
PMM0011	PMED4_00101	Protein phosphatase 2C domain	9.21492	0.229278	17.4	0.530066	18	1	10.0 Regulatory functions	10.0 Regulatory functions	1.15398	0.00874513	0.759286	0.123829	0.810382	0.0366453	0.871698	0.0548416	0.921341	0.267539	1.33695	0.0958231	1.18774	0.303951	1.08065	0.0857458	0.787876	0.107912	0.92614	0.105794	1.0002	0.0560332	1.01614	0.0085726	0.98356	0.190507	0.81437	0.0475025	1.01487	0.0843695	1.43039	0.143924	1.40128	0.255398	1.31028	0.191928	1.08146	0.126006	0.936771
PMM0012	PMED4_00111	argH Fumarate lyase	16.6189	0	18.2	0.94917	6	0.518134	1.0 Amino acid biosynthesis	1.4 Glutamate family / Nitrogen assimilation	0.70566	0.0570059	0.521348	0.0147006	0.93628	0.0491916	1.7382	0.00514227	1.76566	0.717055	2.9176	0.236759	2.00473	0.0687356	1.44368	0.137702	0.965155	0.0401036	0.78479	0.13929	0.765998	0.0685872	0.630631	0.0356735	0.589503	0.0423752	0.537576	0.0296272	1.06571	0.0869291	2.24344	0.445003	3.03031	0.389234	3.03109	0.138655	2.43643	0.176298	1.62446
PMM0013	PMED4_00121	RNA-binding region RNP-1 (RNA recognition motif)	14.0882	0.0087529	4.8	0.814535	16	0.790414	7.0 Fatty acid, phospholipid and sterol metabolism	7.0 Fatty acid, phospholipid and sterol metabolism	1.11327	0.0554233	1.0981	0.0240641	1.06463	0.155539	0.963253	0.122448	0.799581	0.0874679	0.793987	0.0668865	0.99801	0.0107947	0.992221	0.0515135	1.11121	0.0472591	1.05943	0.101624	1.1142	0.0102014	1.11582	0.0537572	1.04943	0.133328	0.983719	0.133762	0.979259	0.103539	0.900042	0.013127	0.820391	0.0739123	0.767186	0.00898334	0.818353	0.0367771	0.932302
PMM0014	PMED4_00131	conserved hypothetical protein	13.873	0.0116038	23	0.800275	9	0.908516	16.0 Hypothetical	16.1 Conserved hypothetical protein	1.17763	0.0824735	0.712003	0.0377069	0.794632	0.037394	0.695901	0.231168	0.951104	0.236464	1.03041	0.0892112	1.26767	0.136656	1.43843	0.226629	1.14535	0.314388	1.11508	0.199426	1.00344	0.190803	0.888111	0.086021	0.902975	0.00909877	0.687003	0.0170884	0.826561	0.142869	0.920012	0.109316	1.02316	0.0336512	1.09915	0.0051545	1.28769	0.0932485	1.33724
PMM0015	PMED4_00141	Domain of unknown function DUF25	10.2829	0.148898	12.2	0.600813	17	1	16.0 Hypothetical	16.1 Conserved hypothetical protein	1.15734	0.129913	0.975642	0.02375	1.03806	0.189955	1.06599	0.109334	0.990153	0.146497	0.989977	0.136399	1.00361	0.0427109	0.928908	0.0365469	0.832744	0.0267838	0.909551	0.0137611	1.00661	0.0970176	1.01264	0.0407753	1.2315	0.260372	1.06622	0.0300643	1.13316	0.118775	1.22291	0.00604161	1.22334	0.0702966	1.04778	0.035866	1.05758	0.138085	0.959449
PMM0016	PMED4_00151	grpE Heat shock protein GrpE	12.5215	0.0392649	22	0.715856	8	0.869391	4.0 Cellular processes	4.3 Chaperones	0.62276	0.172043	0.364354	0.00877808	0.354018	0.0385423	0.578537	0.0644036	0.56843	0.292253	1.00611	0.0032577	1.26723	0.309552	1.11732	0.182522	1.11635	0.122639	1.0284	0.181131	0.836352	0.0306148	0.671952	0.0621005	0.737675	0.162014	0.716297	0.147027	0.949728	0.332207	1.26783	0.239443	1.33689	0.603711	1.43494	0.120046	1.65624	0.154322	1.54837
PMM0017	PMED4_00161	dnaJ DnaJ protein	14.9313	0.00321577	21.4	0.85003	8	0.980173	4.0 Cellular processes	4.3 Chaperones	0.774584	0.0342635	0.497959	0.0877481	0.620037	0.0290422	0.726407	0.0912053	0.74792	0.165598	1.15409	0.00483029	1.41297	0.145688	1.21574	0.214623	1.17908	0.0677161	0.999942	0.0152188	0.823509	0.00844182	0.684811	0.076743	0.778834	0.0865529	0.673106	0.0117833	0.852135	0.0824794	1.09666	0.00903807	1.18838	0.206907	1.3674	0.122347	1.56228	0.239341	1.48613
PMM0018	PMED4_00171	conserved hypothetical protein	13.0298	0.0250948	22.6	0.749333	9	0.96194	16.0 Hypothetical	16.1 Conserved hypothetical protein	1.24218	0.178693	0.71351	0.21729	0.64111	0.117802	0.650259	0.0288913	0.770878	0.161882	1.15691	0.0328779	1.32362	0.298641	1.16268	0.228953	1.05154	0.308147	0.983506	0.160252	1.08674	0.1963	1.02003	0.1089	0.914561	0.359352	0.773178	0.0411991	0.858	0.00555313	0.976909	0.157679	0.999676	0.0430366	1.15366	0.095395	1.47153	0.302106	1.28328
PMM0019	PMED4_00181	conserved hypothetical protein	14.0495	0.00905602	20.4	0.796862	8	0.465676	16.0 Hypothetical	16.1 Conserved hypothetical protein	1.02003	0.027423	0.605456	0.118445	0.862731	0.0303272	0.866912	0.140382	1.16758	0.000521274	0.980108	0.0178382	1.34521	0.248739	1.15717	0.0373479	0.996591	0.00364457	0.898052	0.0186514	0.833145	0.286693	0.760626	0.0217662	0.951798	0.203349	0.677175	0.0880911	0.906171	0.172516	1.08405	0.182613	1.2357	0.240036	1.33492	0.0195255	1.41998	0.12278	1.34659
PMM0020	PMED4_00191	conserved hypothetical protein	16.042	0.000465116	18	0.917424	5	0.979853	16.0 Hypothetical	16.1 Conserved hypothetical protein	0.526892	0.00898202	0.556347	0.105384	1.0544	0.132904	1.5519	0.434498	1.4777	0.86177	2.11961	0.0694434	1.5728	0.205089	1.37517	0.143924	1.02807	0.0822547	0.879987	0.0175364	0.888106	0.0556144	0.807515	0.107148	0.52995	0.138726	0.513853	0.0663624	1.09269	0.149989	2.04635	0.0169999	2.19893	0.227083	1.83976	0.123879	1.56999	0.0563872	1.23473
PMM0021	PMED4_00201	murB UDP-N-acetylenolpyruvoylglucosamine reductase	11.1903	0.0939229	19.6	0.634596	6	0.355075	3.0 Cell envelope	3.2 Murein sacculus and peptidoglycan	0.903029	0.0763576	0.833342	0.0622618	0.837084	0.0362327	0.936389	0.232477	0.978291	0.356895	1.02781	0.0209451	0.952324	0.052645	1.13558	0.0318929	1.02138	0.1068	0.985053	0.177691	0.981657	0.164274	0.871941	0.0378142	1	0.000669629	0.805575	0.000494793	0.94534	0.134291	1.25874	0.0221716	1.15359	0.0535117	1.07013	0.0563729	1.19189	0.240257	0.999664
PMM0022	PMED4_00211	murC Probable UDP-N-acetylmuramate-alanine ligase	14.6495	0.00456204	17.6	0.84091	5	0.681564	3.0 Cell envelope	3.2 Murein sacculus and peptidoglycan	0.989627	0.00460591	0.67532	0.0752158	0.848265	0.122347	1.21005	0.107634	1.3048	0.494348	1.66074	0.183017	1.30127	0.296353	1.22246	0.226069	0.963217	0.0207244	0.798794	0.119641	0.911112	0.0912327	0.923058	0.165321	0.837188	0.0965177	0.614613	0.0223863	1.1698	0.10045	1.61885	0.382767	1.93233	0.164328	1.55762	0.0383848	1.48239	0.0336751	1.00269
PMM0023	PMED4_00221	gap2 Glyceraldehyde 3-phosphatedehydrogenase(NADP+)(phosphorylating)	16.2238	0.000547945	6.8	0.923086	16	0.564184	8.0 Photosynthesis and respiration	8.2 CO2 fixation	2.21186	0.0148487	1.72319	0.0893066	1.45733	0.256554	0.995749	0.313406	0.497897	0.086742	0.333787	0.0266789	0.586678	0.00490447	0.604318	0.0107373	0.789741	0.066313	1.07488	0.153105	1.28059	0.00423526	1.41853	0.00217815	1.36164	0.0758818	1.20933	0.0773452	1.06874	0.0593494	0.628533	0.106991	0.37893	0.00361739	0.31204	0.00714725	0.503451	0.0859142	0.597322
PMM0024	PMED4_00231	thiL putative thiamine-monophosphate kinase	11.2542	0.0911266	5	0.649908	16	0.392542	2.0 Biosynthesis of cofactors, prosthetic groups, and carriers	2.11 Thiamine	1.20407	0.00159678	1.14295	0.229052	1.07101	0.0382698	0.963223	0.31858	0.711129	0.0201015	0.949711	0.167205	0.909594	0.10143	0.998847	0.00778557	1.07545	0.028815	1.01294	0.00237506	1.12125	0.0780224	0.992161	0.10725	1.12257	0.0606822	0.920376	0.0263696	0.965846	0.073055	0.955323	0.032541	0.79826	0.132685	0.756244	0.10043	1.04755	0.044479	0.861421
PMM0025	PMED4_00241	Cyclophilin-type peptidyl-prolyl cis-transisomerase	16.6528	0	6.2	0.950358	16	0.946557	13.0 Translation	13.5 Protein modification and translation factors	1.38179	0.101495	1.24381	0.174472	1.02439	0.168814	0.767177	0.247934	0.512876	0.0307417	0.492	0.0300892	0.657344	0.115187	0.790424	0.0682671	0.901453	0.138696	1.04805	0.0762332	1.25251	0.0763197	1.31576	0.191872	1.38096	0.318876	1.07052	0.244103	1.14684	0.128234	0.939796	0.050362	0.712193	0.0289358	0.588027	0.00378339	0.617538	0.179192	0.760274
PMM0026	PMED4_00251	efp Elongation factor P (EF-P)	13.9816	0.0103553	8	0.792551	1	0.914685	13.0 Translation	13.5 Protein modification and translation factors	1.31582	0.0461443	1.15175	0.021429	1.20319	0.157572	1.3306	0.00520067	1.04113	0.128348	0.804733	0.154104	0.793676	0.143101	0.928073	5.13364e-05	0.916767	0.0515509	1.09652	0.0220241	1.29534	0.113494	1.36319	0.145879	1.13597	0.1172	1.06026	0.117327	1.07878	0.26292	1.08439	0.124047	0.840885	0.162607	0.652342	0.0161352	0.689979	0.0233869	0.786379
PMM0027	PMED4_00261	accB,fabE Biotin / Lipoyl attachment	13.2971	0.0201592	2	0.783435	11	0.415734	7.0 Fatty acid, phospholipid and sterol metabolism	7.0 Fatty acid, phospholipid and sterol metabolism	1.10404	0.026352	0.947637	0.0993293	0.867872	0.175392	1.01628	0.256408	0.762054	0.0296197	0.962624	0.052218	0.993527	0.0628191	1.01652	0.12193	1.04133	0.0887534	1.12266	0.016546	1.156	0.0839063	1.13888	0.101128	0.902423	0.216574	0.841973	0.196803	0.879824	0.0666223	0.972132	0.0860207	0.944332	0.138378	0.935798	0.126524	0.979702	0.0084497	0.991412
PMM0028	PMED4_00271	pdxA putative pyridoxal phosphate biosynthetic proteinPdxA	10.4991	0.135517	21	0.596482	17	1	2.0 Biosynthesis of cofactors, prosthetic groups, and carriers	2.9 Pyridoxine	0.93509	0.099093	0.606505	0.153323	0.865608	0.134115	0.860311	0.324564	0.845715	0.303457	1.00935	0.0223723	1.17083	0.307506	1.08329	0.110836	0.915477	0.121964	0.992698	0.00512618	1.04474	0.0800184	0.877927	0.12367	0.976279	0.0385474	0.828565	0.0289639	0.997962	0.0130647	1.32097	0.183536	1.26202	0.1369	1.01944	0.0451519	1.2088	0.0118092	1.25039
PMM0029	PMED4_00281	conserved hypothetical protein	1.58428	0.958744	4.6	0.0918949	17	1	16.0 Hypothetical	16.1 Conserved hypothetical protein	1.27477	0.206281	0.947729	0.0509329	1.01017	0.134665	0.988226	0.0969958	0.875647	0.268718	0.887041	0.0998216	1.12279	0.0760543	1.11124	0.0549955	1.03944	0.0707575	1.00633	0.0194395	1.02058	0.0320268	1.06427	0.150463	1.09236	0.204957	0.931117	0.105227	1.03159	0.00149773	0.971306	0.0913225	0.911335	0.0724582	0.790751	0.0555783	0.969372	0.0575201	1.02972
PMM0030	PMED4_00291	possible Transcription factor TFIID (or TATA-b	12.3539	0.0459026	18.2	0.705829	6	0.604323	13.0 Translation	13.5 Protein modification and translation factors	0.67488	0.0912468	0.44243	0.019175	0.847875	0.132766	1.42873	0.275769	1.47198	0.670526	2.03675	0.0528224	1.0848	0.145104	0.956486	0.0944447	0.752279	0.0342651	0.837893	0.0202096	1.08841	0.0913456	0.869087	0.0952791	0.649373	0.0327555	0.522913	0.0706116	1.04157	0.206138	1.93148	0.235165	2.59332	0.664994	2.16035	0.0398017	1.3081	0.0456181	0.999387
PMM0031	PMED4_00301	HNH endonuclease	15.815	0.000369686	17.2	0.911653	5	0.984961	11.0 DNA replication, recombination, and repair	11.0 DNA replication, recombination, and repair	0.781247	0.0185679	0.58057	0.0443976	0.995849	0.143799	1.62338	0.0492938	1.54305	0.629021	2.05857	0.0758648	1.36088	0.118211	1.17354	0.0753796	0.946871	0.124701	0.807156	0.164594	0.756542	0.0196169	0.715916	0.0398428	0.74993	0.0352969	0.816741	0.0271943	1.35287	0.100293	2.10475	0.133987	2.28297	0.199224	2.11866	0.271151	1.42939	0.0917569	1.10224
PMM0032	PMED4_00311	possible Bacterial type II secretion system pr	16.2291	0.000274725	18.2	0.926246	5	0.555075	4.0 Cellular processes	4.6 Protein and peptide secretion	0.368612	0.0909345	0.368496	0.034677	0.725055	0.109908	1.69074	0.718952	2.18115	1.28974	3.7588	0.462425	1.98439	0.418407	1.57621	0.261165	0.941622	0.136699	0.672055	0.0609398	0.703876	0.0326705	0.637204	0.0263343	0.456818	0.101995	0.400186	0.0439181	1.06298	0.124803	3.1113	0.950149	3.89697	1.07129	3.6625	0.734483	2.84261	0.109376	1.70852
PMM0033	PMED4_00321	conserved hypothetical protein	16.3099	0.00031348	18.6	0.928318	6	0.944568	16.0 Hypothetical	16.1 Conserved hypothetical protein	0.655453	0.0573135	0.545953	0.101681	0.941091	0.0514575	1.22409	0.0702542	1.17788	0.311552	1.56569	0.035064	1.40344	0.295246	1.25876	0.0763477	0.974428	0.0576772	0.871176	0.220442	0.831938	0.205131	0.732046	0.0226811	0.650045	0.186843	0.591394	0.0730396	1.02416	0.05979	1.5049	0.17389	1.75214	0.107499	1.43787	0.0503738	1.53914	0.122232	1.40405
PMM0034	PMED4_00331	conserved hypothetical protein	11.4281	0.0810319	2.2	0.673032	14	0.425914	16.0 Hypothetical	16.1 Conserved hypothetical protein	0.792564	0.0571271	0.86599	0.022532	0.769216	0.132847	0.78644	0.0748912	0.726482	0.283806	0.911966	0.0956412	0.870754	0.133725	1.07315	0.00356479	1.01403	0.00718896	1.13073	0.0170765	1.11396	0.00702761	1.06223	0.0480859	1.01646	0.106371	0.955073	0.000452784	0.972592	0.0770563	1.04762	0.082383	0.985423	0.0733753	0.943698	0.0199687	0.869569	0.0108505	1.03918
PMM0035	PMED4_00341	DHSS soluble hydrogenase small subunit	16.8025	0	17.6	0.964802	5	0.999626	15.0 Other categories	15.5 Hydrogenase	0.354073	0.0823702	0.388213	0.0862841	1.79297	0.373472	4.05523	0.310936	4.64274	0.525211	4.51095	0.366878	2.86772	0.203529	1.68518	0.0814689	0.91374	0.0185942	0.658609	0.0141937	0.462256	0.0415199	0.348151	0.0151521	0.326185	0.0460734	0.438522	0.00776086	1.7449	0.217744	4.64568	0.319628	5.81869	0.816694	5.03212	0.170636	3.09556	0.0897923	1.89464
PMM0036	PMED4_00351	CbiD protein	4.91666	0.668768	18.6	0.279891	17	1	2.0 Biosynthesis of cofactors, prosthetic groups, and carriers	2.3 Cobalamin, heme, phycobilin and porphyrin	1.38435	0.0600272	0.89756	0.125057	0.891988	0.247808	0.717356	0.158256	0.707817	0.49589	1.10566	0.0653986	1.26329	0.226337	1.12916	0.128277	0.989818	0.0917139	0.903862	0.210843	1.03297	0.23379	1.00723	0.0194848	1.12917	0.0491989	0.863323	0.0575295	0.917522	0.116563	1.06161	0.0547069	1.03503	0.147062	0.90027	0.0526389	1.16383	0.139797	1.00948
PMM0037	PMED4_00361	guaA Glutamine amidotransferase class-I	16.5597	0	18.4	0.944147	6	0.86878	9.0 Purines, pyrimidines, nucleosides, and nucleotides	9.2 Purine ribonucleotide biosynthesis	0.734568	0.0338485	0.549323	0.00721436	1.05506	0.0463462	1.62387	0.305381	1.84581	0.419951	2.28978	0.153563	2.14063	0.299876	1.53484	0.0611151	1.03396	0.121076	0.904801	0.0848022	0.794033	0.0617067	0.709595	0.0483141	0.65714	0.0476331	0.577062	0.0330385	0.918122	0.0724571	2.04241	0.286348	2.32702	0.195689	2.35784	0.0106628	1.9474	0.145006	1.50734
PMM0038	PMED4_00371	hypothetical	14.6855	0.00456664	17.8	0.84176	6	0.722019	16.0 Hypothetical	16.2 No similarity	0.906471	0.0387291	0.615308	0.0236411	0.877513	0.0550908	1.2243	0.0455171	1.05122	0.475181	1.66571	0.202714	1.74333	0.0342354	1.17835	0.228406	0.952781	0.202528	0.726851	0.124058	0.842933	0.277949	0.792717	0.0330271	0.827455	0.221648	0.650885	0.109218	1.12343	0.324838	1.72831	0.0336268	1.76736	0.212042	1.56427	0.248301	1.39553	0.249981	1.04656
PMM0039	PMED4_00381	conserved hypothetical protein	16.6393	0	18.6	0.947102	6	0.689118	16.0 Hypothetical	16.1 Conserved hypothetical protein	0.340585	0.0190791	0.34246	0.0194661	0.740083	0.199582	1.7525	0.125536	2.23969	0.959263	3.43788	0.0407184	2.33682	0.432141	1.73947	0.171828	1.07103	0.0530415	0.846947	0.0727491	0.69026	0.108384	0.544611	0.0407756	0.400145	0.00778065	0.341377	0.0191192	0.900877	0.217285	2.65174	0.877806	2.94891	0.793314	3.45008	0.32574	2.65828	0.112071	1.78053
PMM0040	PMED4_00401	Putative penicillin-binding protein	14.6632	0.00460829	18.2	0.837633	6	0.838006	3.0 Cell envelope	3.2 Murein sacculus and peptidoglycan	0.94503	0.160576	0.84581	0.0615992	0.892674	0.259466	0.999993	0.00544266	1.1637	0.149786	1.18049	0.0433025	1.19709	0.0960083	1.09607	0.0300414	0.859258	0.108245	0.858851	0.0450752	0.858102	0.0674254	0.754129	0.0916959	0.758402	0.0673325	0.771423	0.0317195	1.06534	0.0508105	1.46815	0.108107	1.48767	0.078202	1.44297	0.0688213	1.29485	0.0670432	1.1644
PMM0041	PMED4_00411	possible reductase	16.2529	0.000290698	5.2	0.936465	15	0.842035	15.0 Other categories	15.7 Other	1.62228	0.21901	1.2349	0.144144	0.710287	0.115627	0.633293	0.17923	0.410049	0.174278	0.487879	0.0575845	0.602514	0.229259	0.865217	0.1447	0.835961	0.43711	1.19892	0.243001	1.5949	0.126133	1.61143	0.444128	1.50074	0.679981	0.965632	0.26374	0.931337	0.0845673	0.801737	0.0917736	0.642433	0.14086	0.547981	0.0458851	0.765805	0.113532	0.872367
PMM0042	PMED4_00421	flavoprotein	8.27087	0.315488	6.6	0.470854	18	1	15.0 Other categories	15.7 Other	1.40354	0.181788	0.904205	0.127142	0.934615	0.111394	0.855477	0.126856	0.927646	0.0782374	0.733469	0.0145062	1.02237	0.0735483	1.00479	0.00429073	0.908673	0.117904	0.973412	0.137349	1.00494	0.0969691	1.02185	0.0727592	1.38511	0.122913	1.0989	0.156869	1.14537	0.0292894	1.07486	0.0926062	1.13643	0.0125856	0.924224	0.0935076	0.936462	0.073878	1.00709
PMM0043	PMED4_00431	flavoprotein	15.2154	0.000945626	8.8	0.864091	2	0.986491	15.0 Other categories	15.7 Other	1.51635	0.110556	1.29289	0.200836	1.09798	0.111441	0.713364	0.0104503	0.63139	0.134696	0.524738	0.0402161	0.531659	0.0677716	0.688423	0.047338	0.657019	0.0083928	0.734936	0.0100498	1.02244	0.0152477	1.05516	0.0966981	1.88384	0.356739	1.71878	0.105293	1.63075	0.0664292	1.33178	0.0538272	1.17005	0.16971	0.677973	0.0178754	0.692541	0.00172424	0.728732
PMM0044	PMED4_00441	alaS Alanyl-tRNA synthetase	14.6938	0.00460094	23.8	0.855105	10	0.985527	13.0 Translation	13.1 Aminoacyl tRNA synthetases and tRNA modification	0.947165	0.0872431	0.752024	0.177909	0.736436	0.195347	0.711518	0.137208	0.725229	0.016029	0.954611	0.0408996	1.19666	0.242759	1.22429	0.184073	1.10933	0.11666	1.09091	0.135933	1.10029	0.0297418	0.944258	0.129278	0.851091	0.178163	0.752325	0.0733181	0.764962	0.00219405	0.98248	0.0858126	0.975231	0.110955	1.04291	0.0609138	1.32853	0.249755	1.44329
PMM0045	PMED4_00451	Orn/DAP/Arg decarboxylases family 2	12.0967	0.055228	19.6	0.686165	8	0.536665	15.0 Other categories	15.7 Other	0.879033	0.164877	0.581932	0.075729	0.726904	0.0618335	0.900153	0.141743	1.01292	0.153754	1.05011	0.166094	1.07531	0.132823	1.17443	0.0749355	0.855341	0.0212769	0.797629	0.262754	0.877703	0.340804	0.786363	0.0034035	0.841233	0.0817699	0.676171	0.103734	0.891079	0.172466	1.57784	0.100474	1.59527	0.250026	1.31443	0.0488908	1.31097	0.206118	1.19123
PMM0046	PMED4_00461	Nucleoside diphosphate kinase	16.8486	0	5.2	0.970789	16	0.996503	9.0 Purines, pyrimidines, nucleosides, and nucleotides	9.1 Interconversions and salvage of nucleosides and nucleotides	1.43212	0.12799	1.33019	0.0382413	0.948103	0.126686	0.499457	0.0106799	0.26665	0.137729	0.408115	0.0352199	0.52713	0.121383	0.787108	0.0132637	1.03056	0.188578	1.23433	0.0684153	1.77159	0.0198942	1.70813	0.0968402	1.40221	0.399616	0.999692	0.0597148	0.750477	0.172675	0.53775	0.0266972	0.344394	0.0663577	0.337016	0.0567859	0.513286	0.126744	0.72621
PMM0047	PMED4_00471	thiO PUTATIVE THIAMINE BIOSYNTHESIS OXIDOREDUCTASE	13.0155	0.0252525	23.8	0.757948	10	0.902464	2.0 Biosynthesis of cofactors, prosthetic groups, and carriers	2.11 Thiamine	0.911594	0.0446357	0.660384	0.12435	0.809078	0.0430939	0.66601	0.145263	0.86071	0.145851	0.900807	0.0292892	1.02125	0.0767449	1.19565	0.0557719	1.11023	0.0401263	1.08747	0.120179	1.05716	0.187204	0.936729	0.0216324	0.931617	0.0856277	0.842499	0.0180402	0.837406	0.00448069	0.985325	0.181775	1.13248	0.187779	1.00213	0.148079	1.17406	0.0313425	1.17934
PMM0048	PMED4_00481	gatB Glutamyl-tRNA (Gln) amidotransferase subunit B	13.4161	0.018015	18	0.766912	6	0.705256	13.0 Translation	13.1 Aminoacyl tRNA synthetases and tRNA modification	0.969615	0.0392391	0.902261	0.00463361	0.941046	0.0368272	0.959947	0.0252309	1.01885	0.151798	1.11133	0.00536675	1.03705	0.0707037	1.11372	0.118288	0.948468	0.0247835	0.971674	0.0666001	0.979062	0.0324196	0.975161	0.134503	0.992873	0.10609	0.895718	0.077204	1.00499	0.128378	1.27843	0.144964	1.23099	0.101913	1.14909	0.0300498	1.09252	0.0146073	1.13937
PMM0049	PMED4_00491	coaE putative dephospho-CoA kinase	8.85964	0.260378	11.8	0.515621	18	1	10.0 Regulatory functions	10.0 Regulatory functions	1.61219	0.217234	0.946677	0.0867461	1.01445	0.162404	0.91309	0.0217112	1.21331	0.747079	0.874377	0.0627854	0.852838	0.0319094	0.904811	0.0656425	0.907807	0.0624136	0.88537	0.369261	1.12201	0.504662	0.918843	0.00922049	1.27478	0.0486138	1.12935	0.0233215	1.22812	0.291426	1.2983	0.0376961	1.20164	0.305581	1.03115	0.0545724	1.04994	0.457888	0.975681
PMM0050	PMED4_00501	argJ ArgJ family	16.0189	0.000451467	17.2	0.92365	5	0.953421	1.0 Amino acid biosynthesis	1.4 Glutamate family / Nitrogen assimilation	0.920648	0.122262	0.820418	0.0315446	1.19924	0.197901	1.57438	0.0625352	1.66365	0.629637	1.62956	0.2112	1.38637	0.173649	1.12436	0.169193	0.922949	0.187253	0.805091	0.0615164	0.733246	0.199595	0.680908	0.105276	0.873388	0.0548315	0.777182	0.0519911	1.00648	0.150339	1.70507	0.152217	1.91427	0.142619	1.54994	0.191118	1.42273	0.183349	0.971979
PMM0051	PMED4_00511	conserved hypothetical protein	16.6369	0	17.6	0.954257	5	0.999006	16.0 Hypothetical	16.1 Conserved hypothetical protein	0.581368	0.086032	0.462987	0.077069	1.43778	0.488347	3.97187	1.38474	4.01388	0.0621847	4.33731	0.613012	3.24637	0.384496	1.62177	0.193659	0.946405	0.0959781	0.75405	0.00555666	0.652162	0.0804898	0.566379	0.0171643	0.517177	0.0376833	0.460272	0.063755	1.32638	0.327211	3.5092	0.0304652	4.04633	0.0321891	3.8497	0.007413	2.99798	0.16359	1.46612
PMM0052	PMED4_00521	Aldo/keto reductase family	8.78987	0.266307	19	0.499609	18	1	15.0 Other categories	15.7 Other	1.03722	0.0987291	0.742565	0.257762	0.839246	0.09559	0.828222	0.0358257	0.907736	0.335424	1.31507	0.163271	0.986681	0.0123662	1.11972	0.171991	0.952032	0.106565	0.862083	0.0515341	1.05528	0.266819	1.01621	0.0693545	0.988319	0.0101245	0.795019	0.0684517	1.07264	0.109512	1.3504	0.0724975	1.55354	0.0757889	0.932353	0.0487504	1.31075	0.0451604	1.14386
PMM0053	PMED4_00541	Putative RNA methylase family UPF0020	13.8296	0.0120235	19.2	0.785397	6	0.769403	15.0 Other categories	15.7 Other	1.02782	0.0432315	0.735806	0.170844	0.884911	0.0299819	1.021	0.204833	1.16164	0.106712	1.44867	0.113647	1.18488	0.158291	1.20863	0.0885561	0.884925	0.156829	0.852636	0.0384668	1.0721	0.196045	0.875465	0.185001	0.817071	0.142948	0.732456	0.0213638	0.870499	0.162332	1.27655	0.0526854	1.64781	0.182671	1.51874	0.0479246	1.53356	0.318343	1.05232
PMM0054	PMED4_00551	conserved hypothetical protein	15.9243	0.000417537	17.4	0.914702	5	0.988756	16.0 Hypothetical	16.1 Conserved hypothetical protein	0.778149	0.0844181	0.576073	0.0714383	1.06366	0.052227	1.57724	0.0294881	1.82169	0.939828	2.39209	0.283641	1.71065	0.0125817	1.20491	0.0241918	0.918998	0.0765538	0.79768	0.0300112	0.840571	0.100077	0.698791	0.00835323	0.708876	0.0130811	0.624792	0.069553	1.19298	0.235934	2.35094	0.499919	2.5533	0.141504	2.5452	0.00959976	1.6835	0.166812	1.16465
PMM0055	PMED4_00561	conserved hypothetical protein	15.6621	0.000314465	17.6	0.898816	5	0.941582	16.0 Hypothetical	16.1 Conserved hypothetical protein	0.492273	0.0411832	0.386437	0.114015	0.740015	0.247486	1.4372	0.501323	1.73069	1.02888	2.42791	0.229021	1.38093	0.358497	1.20612	0.0949316	0.79821	0.0300885	0.663105	0.143595	0.614378	0.108447	0.578103	0.0158807	0.485754	0.133313	0.619413	0.0399449	1.45652	0.252191	3.60824	0.164904	3.49376	0.0979282	3.02276	0.0561126	2.14801	0.0236232	1.47139
PMM0056	PMED4_00581	conserved hypothetical protein	13.9795	0.010423	9.2	0.795465	1	0.914695	16.0 Hypothetical	16.1 Conserved hypothetical protein	2.07215	0.0132883	1.57555	0.0602601	1.93042	0.371276	1.53604	0.320412	1.09851	0.0110791	0.784405	0.0966034	0.906539	0.0176365	0.887742	0.0535312	0.741058	0.19844	1.00134	0.134189	1.17596	0.144555	1.32846	0.2064	1.40365	0.250696	1.2045	0.341335	1.24197	0.258581	1.15771	0.0501876	0.808837	0.0822888	0.552678	0.0639837	0.572441	0.121124	0.829572
PMM0057	PMED4_00591	putative chromosome segregation protein, SMCATPase superfamily	15.1692	0.00138568	18	0.86725	6	0.930164	13.0 Translation	13.4 Nucleoproteins	0.893475	0.053967	0.602252	0.0266064	0.856134	0.0343054	1.27157	0.16651	1.58971	0.289469	2.0241	0.157469	1.59885	0.264142	1.27197	0.0763835	0.937584	0.10679	0.876351	0.147513	0.798485	0.121675	0.801011	0.00509752	0.85692	0.0141969	0.799897	0.0195279	1.00874	0.0248379	2.06628	0.0848745	2.37931	0.135856	2.59976	0.16034	1.86078	0.0462584	1.26577
PMM0058	PMED4_00601	conserved hypothetical protein	16.1684	0.000524934	16.6	0.936285	5	0.783392	16.0 Hypothetical	16.1 Conserved hypothetical protein	1.00366	0.0584312	0.849298	0.172542	1.13117	0.104669	1.73409	0.0407596	1.86114	0.61636	1.9449	0.1798	1.5581	0.148024	1.23477	0.00275741	0.851993	0.0036265	0.799926	0.1064	0.810878	0.143202	0.757404	0.00505269	0.894566	0.0863947	0.83451	0.148245	1.39057	0.0302202	2.2742	0.0545998	2.30029	0.050472	2.0666	0.0441899	1.55699	0.271833	1.15618
PMM0059	PMED4_00611	conserved hypothetical protein	4.90813	0.669516	2.6	0.288924	18	1	16.0 Hypothetical	16.1 Conserved hypothetical protein	1.32753	0.35023	0.782501	0.0588472	0.781841	0.365077	0.603626	0.0869807	0.789163	0.536316	0.806201	0.00628382	1.24625	0.109174	1.10132	0.252748	0.967072	0.239432	1.02054	0.241931	1.11819	0.370272	1.08741	0.0585842	1.20383	0.071626	0.919106	0.0854585	1.00979	0.2133	1.17176	0.165634	1.00054	0.432482	0.825173	0.118326	1.19733	0.359403	0.940043
PMM0060	PMED4_00621	accC, fabG acetyl-CoA carboxylase, biotin carboxylasesubunit	16.9408	0	5.8	0.970932	16	0.999509	7.0 Fatty acid, phospholipid and sterol metabolism	7.0 Fatty acid, phospholipid and sterol metabolism	1.61623	0.016089	1.36111	0.17502	1.04805	0.148339	0.693285	0.0621058	0.420002	0.0919463	0.436785	0.046804	0.654162	0.0981951	0.795908	0.0215823	0.959609	0.143683	1.23513	0.0430599	1.42707	0.0222801	1.57226	0.176959	1.34604	0.214025	1.13803	0.0788411	0.890925	0.11695	0.751531	0.0213944	0.510604	0.0242878	0.484931	0.0322222	0.615472	0.0867114	0.75479
PMM0061	PMED4_00631	YGGT family, conserved hypothetical integralmembrane protein	12.5053	0.0398369	10	0.715375	2	0.508754	15.0 Other categories	15.7 Other	1.52027	0.396564	1.09417	0.318714	1.09257	0.00609986	1.2537	0.284928	0.845863	0.421461	0.960604	0.20731	0.681972	0.205154	0.867505	0.0955702	0.764518	0.27507	0.894507	0.178511	1.1448	0.054096	1.20717	0.336341	1.29267	0.246061	0.903092	0.189479	1.12963	0.0166492	1.25051	0.13868	1.06932	0.0953403	0.811793	0.111367	0.769666	0.0738994	0.688749
PMM0063	PMED4_00651	conserved hypothetical protein	16.6588	0	18.8	0.947247	6	0.96368	16.0 Hypothetical	16.1 Conserved hypothetical protein	0.703301	0.079914	0.50416	0.0240207	0.842812	0.210353	1.62522	0.301193	2.45271	0.411678	2.33908	0.0466338	2.0215	0.162819	1.52758	0.204246	1.07923	0.121053	0.841595	0.0748923	0.745498	0.0218252	0.594412	0.0444377	0.513608	0.043395	0.494588	0.0805635	0.790682	0.0770967	1.74426	0.30489	2.39046	0.48289	2.49008	0.129237	2.15333	0.152491	1.5947
PMM0064	PMED4_00661	hli2 possible high light inducible protein	15.313	0.000880503	3.6	0.896391	12	0.693429	15.0 Other categories	15.1 Adaptations and atypical conditions	1.22431	0.0464452	0.826927	0.0163348	0.755841	0.0201158	0.669687	0.0126688	0.601086	0.115847	0.774634	0.0889524	0.8634	0.167592	1.05479	0.0635553	1.01108	0.149776	1.26381	0.161021	1.36635	0.0657213	1.36904	0.155013	1.01542	0.393065	0.838393	0.140494	0.866479	0.0735194	1.00042	0.249737	0.807999	0.30704	0.80797	0.0685889	0.858331	0.0580714	0.974032
PMM0065	PMED4_00671	ABC transporter, ATP binding protein	14.6682	0.00461681	1.4	0.863253	11	0.985007	14.0 Transport and binding proteins	14.0 Transport and binding proteins	1.18644	0.228255	0.767064	0.00475346	0.763552	0.0703626	0.712053	0.12575	0.780456	0.159275	0.857164	0.00141155	1.16528	0.0234206	1.26117	0.0339585	1.07896	0.0148633	1.1446	0.0100634	1.15128	0.140611	1.12303	0.0951177	0.954564	0.0998668	0.753499	0.0133352	0.753544	0.0309526	0.813998	0.0318893	0.782833	0.00788841	0.817928	0.0428358	0.988705	0.059816	1.0877
PMM0066	PMED4_00681	conserved hypothetical protein	7.78119	0.363313	3.8	0.454722	18	1	16.0 Hypothetical	16.1 Conserved hypothetical protein	1.29728	0.241761	0.827586	0.0721676	0.711013	0.121122	0.712942	0.000233745	0.738795	0.0924334	0.905657	0.0583726	0.971897	0.311985	0.941072	0.0625394	1.06609	0.116157	0.918723	0.0037185	1.1204	0.162081	0.972843	0.0630095	1.38206	0.610929	1.04673	0.178646	1.09904	0.0133756	1.14618	0.155747	1.02904	0.00712355	0.913142	0.0263537	1.03356	0.0720221	1.15336
PMM0067	PMED4_00691	HIT (Histidine triad) family protein	14.3092	0.00699013	23.2	0.827483	9	0.869731	10.0 Regulatory functions	10.0 Regulatory functions	1.28655	0.102309	0.742977	0.0523667	0.703517	0.0766325	0.776806	0.011232	0.680317	0.370298	1.04446	0.0827351	1.28518	0.284434	1.38018	0.018492	1.10482	0.0847126	1.0902	0.14592	1.08158	0.121622	0.857748	0.0299842	0.79129	0.106538	0.673185	0.0942574	0.771916	0.0371233	0.866255	0.106595	0.979499	0.0915419	1.00975	0.0189981	1.17838	0.0581542	1.22607
PMM0068	PMED4_00701	def putative formylmethionine deformylase	14.3799	0.00653814	23.8	0.837395	10	0.958597	10.0 Regulatory functions	10.0 Regulatory functions	0.902401	0.122673	0.54705	0.0977664	0.484941	0.069404	0.577517	0.114214	0.456574	0.300811	0.912755	0.0216587	1.09331	0.393467	1.18754	0.280785	1.20762	0.0658615	1.27248	0.14567	1.01429	0.174246	0.977881	0.0114096	0.823106	0.26799	0.731681	0.165494	0.797142	0.100971	1.07777	0.18085	1.06704	0.366985	1.0285	0.252315	1.12614	0.050884	1.35862
PMM0069	PMED4_00711	Esterase/lipase/thioesterase family active site	9.78117	0.184154	1.6	0.576096	18	1	7.0 Fatty acid, phospholipid and sterol metabolism	7.0 Fatty acid, phospholipid and sterol metabolism	1.04012	0.0855789	0.879125	0.0603309	0.878397	0.0055477	0.758063	0.0744368	0.817948	0.23694	0.844428	0.00127288	1.02013	0.0208453	1.02802	0.0691669	0.934723	0.0600629	0.961988	0.085569	1.12734	0.180476	0.99577	0.00652484	1.11613	0.0446921	0.800389	0.0289464	1.00832	0.22273	0.984699	0.0944005	0.969258	0.090585	0.879659	0.0955715	1.09958	0.101243	1.14102
PMM0070	PMED4_00721	putative cysteine desulfurase or selenocysteinelyase	9.5885	0.19843	2.2	0.564904	17	1	1.0 Amino acid biosynthesis	1.4 Glutamate family / Nitrogen assimilation	0.969668	0.0933206	0.751115	0.129849	0.717695	0.0558951	0.792227	0.194606	0.783859	0.0605205	0.741657	0.06059	0.895211	0.0690675	0.936988	0.0161382	1.04042	0.162441	1.02008	0.111948	1.03109	0.00471987	1.08513	0.134141	1.1207	0.276273	1.02987	0.0564996	0.905321	0.00866772	1.06746	0.0915791	1.23618	0.165773	1.0766	0.0957482	0.97801	0.0241901	1.14574
PMM0071	PMED4_00731	ABC transporter, membrane component	12.2043	0.0518686	2	0.719139	12	0.571051	14.0 Transport and binding proteins	14.0 Transport and binding proteins	1.16893	0.0968077	0.720403	0.163935	0.576026	0.176702	0.514288	0.122617	0.628856	0.143431	0.715515	0.0833829	0.882002	0.138009	0.999492	0.0302485	0.998979	0.0517867	0.988135	0.109361	1.13449	0.212894	1.18997	0.183222	0.932429	0.194747	0.916356	0.0208228	0.953647	0.100388	0.94216	0.231079	0.998428	0.00975407	0.939208	0.022129	1.04099	0.145255	1.31173
PMM0072	PMED4_00741	ABC transporter, ATP binding component	12.5298	0.0388077	1.8	0.738135	11	0.694284	14.0 Transport and binding proteins	14.0 Transport and binding proteins	1.27554	0.111973	0.743686	0.138897	0.775311	0.102896	0.640165	0.0645703	0.66195	0.202961	0.843966	0.100399	1.00946	0.0684055	1.12075	0.0061313	1.08244	0.000422989	1.08477	0.110957	1.04508	0.0266659	1.07084	0.0815366	1.08093	0.157137	0.82611	0.119543	0.832041	0.0812916	0.988058	0.052782	0.940665	0.0602138	0.892334	0.0127408	1.05622	0.049925	1.05147
PMM0073	PMED4_00751	ABC transporter, membrane component	12.7311	0.0324864	4	0.742428	12	0.469165	14.0 Transport and binding proteins	14.0 Transport and binding proteins	1.1047	0.0436399	0.827107	0.170659	0.792497	0.0988837	0.771237	0.0219351	0.658329	0.197871	0.822832	0.0105936	0.845894	0.175327	0.98151	0.000910751	1.04245	0.00381851	1.04425	0.0343086	1.07989	0.0155015	1.12031	0.142762	1.14378	0.246909	1.02112	0.139787	0.943125	0.0684423	1.04442	0.134714	1.01874	0.155664	0.847971	0.0409001	0.904352	0.0285567	1.04641
PMM0074	PMED4_00761	conserved hypothetical	7.28756	0.412518	19.6	0.41332	18	1	16.0 Hypothetical	16.1 Conserved hypothetical protein	1.03928	0.0417313	0.672979	0.0493563	0.918995	0.00959389	1.05653	0.177465	0.956771	0.0508567	0.98589	0.0254863	1.12665	0.107542	0.974668	0.0322741	0.996768	0.140524	1.0992	0.303598	0.947918	0.167228	0.789333	0.117949	1.05692	0.0530469	0.944556	0.0568936	1.11045	0.337924	1.33197	0.297546	1.26919	0.233049	1.08561	0.149668	1.12612	0.323081	1.15177
PMM0075	PMED4_00771	conserved hypothetical protein	14.1194	0.00865835	16.4	0.820168	4	0.563699	16.0 Hypothetical	16.1 Conserved hypothetical protein	0.421131	0.113625	1.16782	0.00235661	2.063	0.0912198	2.15024	0.205057	1.42084	0.703948	1.13042	0.187022	1.0112	0.0251348	1.04839	0.0935224	0.942012	0.0476975	0.760398	0.0190518	0.499822	0.0554869	0.19857	0.0084607	0.353895	0.00348471	1.04277	0.00364917	2.29873	0.0237404	2.47952	0.070383	2.20339	0.0392452	1.35063	0.0256566	1.01707	0.161677	1.04823
PMM0076	PMED4_00791	pgm Phosphoglucomutase	16.079	0.000481928	9.4	0.915831	2	0.990103	15.0 Other categories	15.7 Other	2.69924	0.075183	2.3953	0.0506799	1.65807	0.0670127	0.974811	0.0604129	0.878279	0.195569	0.621482	0.0876716	0.735057	0.096444	0.75322	0.0196058	0.777376	0.0815646	0.728523	0.0165545	1.03848	0.0485696	1.42299	0.240944	2.94717	0.0903258	2.34095	0.102218	2.0021	0.239157	1.30612	0.172369	1.20672	0.126091	0.674908	0.131802	0.671699	0.0731395	0.682844
PMM0077	PMED4_00801	yrvN putative ATPase, AAA family	8.74158	0.270307	10.8	0.503971	18	1	10.0 Regulatory functions	10.0 Regulatory functions	1.81885	0.205476	1.02349	0.0646205	1.01745	0.00759704	0.889212	0.0835473	0.889186	0.143122	0.865435	0.0386691	1.0265	0.0264641	0.950677	0.0739534	0.894607	9.36495e-05	0.777117	0.0390633	1.05146	0.170596	0.908675	0.0825555	1.51523	0.0672692	1.15223	0.0751605	1.14181	0.064949	1.28826	0.23842	1.24665	0.296673	0.932135	0.0788644	1.07362	0.161535	0.952476
PMM0078	PMED4_00811	possible 4'-phosphopantetheinyl transferasefamily protein	14.9384	0.00313152	3.8	0.871798	15	0.401284	15.0 Other categories	15.7 Other	1.41385	0.132294	0.85692	0.12161	0.706984	0.045315	0.762424	0.100129	0.619657	0.141584	0.816421	0.179733	0.992951	0.0316037	1.10249	0.0490766	1.03706	0.0593891	1.12647	0.184464	1.16771	0.103524	1.19506	0.326096	1.119	0.227012	0.954274	0.105828	0.936529	0.0611293	0.826375	0.0153171	0.717117	0.0994948	0.752438	0.089341	0.89426	0.223219	0.974237
PMM0079	PMED4_00821	bcp putative bacterioferritin comigratory (BCP)protein	6.60307	0.48364	12.8	0.387522	17	1	14.0 Transport and binding proteins	14.0 Transport and binding proteins	1.05535	0.00902484	0.92488	0.0851267	1.08028	0.0618775	1.22631	0.10378	0.799546	0.578965	0.960144	0.0142449	0.955636	0.0643853	0.985721	0.0578454	0.945751	0.142589	0.942329	0.0739066	1.08896	0.0316825	1.10567	0.161378	0.853991	0.199705	0.921336	0.161638	1.04004	0.23182	1.26401	0.00456654	1.04458	0.224539	0.86792	0.00595937	0.883302	0.33378	0.864791
PMM0080	PMED4_00831	conserved hypothetical protein	12.5835	0.0369693	4	0.734148	12	0.5427	16.0 Hypothetical	16.1 Conserved hypothetical protein	1.49924	0.016907	0.771252	0.158796	0.707436	0.00398872	0.827654	0.207222	0.612136	0.210382	0.800534	0.144475	0.919774	0.134858	1.12095	0.103565	0.938386	0.143739	1.04884	0.116049	1.14408	0.330472	1.09681	0.0254133	1.25517	0.190729	1.12374	0.131209	0.910419	0.00703927	0.978483	0.0175356	0.899754	0.200109	0.747808	0.00358999	0.974936	0.00370097	1.00713
PMM0081	PMED4_00841	cysH Phosphoadenosine phosphosulfate reductase	15.2349	0.000837321	4.6	0.883651	15	0.94815	1.0 Amino acid biosynthesis	1.5 Serine family / Sulfur assimilation	1.39989	0.114364	0.832863	0.336621	0.498119	0.0368114	0.537259	0.160526	0.492421	0.077624	0.574686	0.169589	0.587647	0.384322	0.803492	0.130318	1.02103	0.110888	1.19219	0.0581688	1.44181	0.0661553	1.56896	0.351441	1.30492	0.410539	1.10665	0.17884	0.897349	0.159268	0.968432	0.0605007	0.702577	0.0387797	0.667934	0.0333928	0.731118	0.219428	0.911648
PMM0082	PMED4_00851	putative NADH dehydrogenase, transportassociated	10.5754	0.131087	14	0.623149	18	1	10.0 Regulatory functions	10.0 Regulatory functions	1.11786	0.208108	0.812912	0.112624	0.981741	0.0702953	0.860153	0.0866261	1.15206	0.111401	1.07675	0.108955	0.877857	0.0403469	0.889235	0.161392	0.858376	0.162623	0.798083	0.227474	0.882699	0.302326	0.859758	0.0724032	1.04503	0.0225796	0.947508	0.127149	1.10889	0.258557	1.34718	0.0161514	1.51655	0.149268	1.13209	0.00757579	0.986115	0.129304	0.899544
PMM0083	PMED4_00861	putative sodium/sulfate transporter, DASS family	3.9643	0.760984	14.2	0.233557	17	1	10.0 Regulatory functions	10.0 Regulatory functions	1.22609	0.28502	1.01642	0.0855747	1.21887	0.303678	1.14948	0.501615	1.16639	0.167214	1.11263	0.0578958	1.18096	0.0539888	1.04624	0.107339	0.873961	0.0239597	0.942755	0.0616148	1.10253	0.0377705	1.09304	0.0931292	1.05125	0.0981594	0.950846	0.0261733	0.952029	0.100969	1.02032	0.0485847	1.04492	0.100856	0.973924	0.0231368	1.06065	0.0153068	0.920961
PMM0084	PMED4_00871	possible sodium transporter, Trk family	13.6544	0.014936	23.4	0.790765	9	0.756439	14.0 Transport and binding proteins	14.0 Transport and binding proteins	1.04778	0.0834536	0.710162	0.0613048	0.82431	0.0398045	0.902972	0.194795	0.885202	0.0344065	1.11702	0.0340862	1.22824	0.0643758	1.24134	0.0405499	1.0363	0.0565916	0.964132	0.0346863	1.09249	0.0182365	1.09344	0.0808056	0.862779	0.114943	0.733843	0.0647912	0.773796	0.0140619	0.940608	0.0656638	1.11905	0.0888159	0.954202	0.0130778	1.22202	0.111462	1.11455
PMM0085	PMED4_00881	putative potassium channel, VIC family	15.5071	0.00070922	2.8	0.912103	12	0.840678	10.0 Regulatory functions	10.0 Regulatory functions	1.05228	0.0142473	0.820856	0.0667622	0.679966	0.109875	0.690439	0.0911632	0.587174	0.185923	0.723483	0.0572688	0.881218	0.141971	1.17219	0.0199434	1.24697	0.139672	1.33053	0.076945	1.31817	0.0321619	1.30417	0.040225	1.02289	0.28139	0.868842	0.104899	0.831286	0.0983277	0.946273	0.0770143	0.769354	0.0396424	0.80231	0.0465941	0.838438	0.052683	1.06717
PMM0086	PMED4_00891	Conserved hypothetical protein	15.9943	0.000443459	20.4	0.907264	7	0.522994	16.0 Hypothetical	16.1 Conserved hypothetical protein	0.550067	0.00603404	0.378256	0.0575319	0.51147	0.143245	1.09394	0.379989	1.46989	0.0910462	1.563	0.17219	1.79452	0.451421	1.69708	0.429715	1.11007	0.0126421	0.939665	0.0222973	0.866552	0.0126748	0.768934	0.0353355	0.53819	0.101766	0.518637	0.11748	0.701852	0.0474723	1.37979	0.140938	1.82879	0.184845	1.66267	0.125809	1.78098	0.201374	1.71405
PMM0087	PMED4_00901	conserved hypothetical protein	16.7036	0	20.8	0.948167	7	0.744662	16.0 Hypothetical	16.1 Conserved hypothetical protein	0.314969	0.0392202	0.225693	0.0499013	0.43842	0.187517	1.0408	0.336738	1.25644	0.0680854	1.67453	0.0393614	1.91769	0.332836	1.97711	0.212633	1.16966	0.0751016	0.857995	0.096819	0.752341	0.0268039	0.593098	0.105411	0.334763	0.0812958	0.241685	0.0237115	0.468235	0.103203	1.16524	0.10265	1.57903	0.196132	1.64446	0.0972103	1.83389	0.182267	2.1825
PMM0088	PMED4_00911	conserved hypothetical protein	16.5896	0	20.6	0.941341	7	0.909267	16.0 Hypothetical	16.1 Conserved hypothetical protein	0.591259	0.0447055	0.43536	0.0230926	0.640493	0.088111	1.10998	0.0632855	1.31084	0.265365	1.71902	0.0107003	1.98206	0.230422	1.93614	0.162709	1.26482	0.0112086	0.999817	0.0102421	0.886548	0.109968	0.825554	0.0763312	0.53831	0.143571	0.390448	0.0810482	0.584748	0.123631	1.14079	0.269466	1.4629	0.34092	1.43335	0.0788358	1.66117	0.19005	1.6831
PMM0089	PMED4_00931	ABC transporter, ATP binding component	15.2799	0.000857843	22.4	0.876057	9	0.976865	14.0 Transport and binding proteins	14.0 Transport and binding proteins	0.934695	0.00684829	0.629825	0.0490868	0.70599	0.0284271	0.835665	0.223903	0.890885	0.0642327	1.17416	0.0815972	1.42471	0.335951	1.48508	0.0423826	1.13328	0.142148	0.98873	0.0459336	1.01508	0.100952	0.956318	0.0875153	0.844498	0.0997359	0.681924	0.089475	0.733915	0.0251428	0.983679	0.0236163	1.15228	0.108329	1.04194	0.0272844	1.17903	0.236867	1.32127
PMM0090	PMED4_00951	possible serine protease	14.6021	0.00473214	18.4	0.832958	6	0.86267	13.0 Translation	13.3 Degradation of proteins, peptides, and glycopeptides	0.751679	0.235664	0.478063	0.288411	0.847483	0.0579754	1.12003	0.0948327	1.22447	0.575002	1.38174	0.0216375	1.16127	0.142373	1.17321	0.081178	0.962387	0.0460683	0.845228	0.118131	0.847232	0.0646769	0.661671	0.00820021	0.786091	0.0789681	0.647461	0.0650423	1.01258	0.0114754	2.10399	0.0545082	2.20461	0.633349	1.68279	0.00948793	1.56499	0.379185	1.29463
PMM0091	PMED4_00961	conserved hypothetical protein	13.6711	0.0145	16	0.797397	4	0.851206	16.0 Hypothetical	16.1 Conserved hypothetical protein	0.783733	0.279285	0.775722	0.372695	0.736098	0.255159	0.862846	0.320069	0.777577	0.600534	1.34971	0.228347	1.0538	0.350941	0.884817	0.195641	0.784259	0.0576002	0.704511	0.0958016	0.828762	0.00932847	0.839202	0.157794	1.10837	0.33816	1.11835	0.410451	1.33446	0.260398	2.08233	0.313451	1.85325	0.462312	1.473	0.101881	1.28114	0.165409	1.13416
PMM0092	PMED4_00971	conserved hypothetical protein	15.204	0.00105634	16.4	0.883323	4	0.807807	16.0 Hypothetical	16.1 Conserved hypothetical protein	1.25526	0.0464751	0.862869	0.0593789	0.904502	0.119223	1.18412	0.114292	1.08212	0.552732	1.44101	0.00378209	1.24524	0.271184	1.09969	0.0998396	0.975179	0.00593431	0.827207	0.0926451	0.75382	0.0477054	0.745607	0.0833809	0.894913	0.173196	0.920676	0.0920224	1.058	0.0732065	1.59059	0.213795	1.60814	0.252635	1.34498	0.0628033	1.06376	0.0366204	0.980854
PMM0093	PMED4_00981	hli1 possible high light inducible protein	15.3407	0.000899743	8	0.869833	1	0.958067	15.0 Other categories	15.1 Adaptations and atypical conditions	1.2798	0.23097	1.24249	0.0284068	0.870799	0.144854	0.892885	0.208885	0.564639	0.398494	0.764911	0.0855822	0.744946	0.117749	0.958673	0.0705241	0.889947	0.177678	0.99568	0.0114783	1.18438	0.142131	1.23562	0.000482914	1.35161	0.401331	1.13166	0.205755	1.19402	0.119175	1.11235	0.0550198	0.886249	0.0697676	0.648141	0.02148	0.653703	0.00178821	0.726563
PMM0094	PMED4_00991	conserved hypothetical protein	8.28867	0.314011	18.8	0.471407	17	1	16.0 Hypothetical	16.1 Conserved hypothetical protein	1.15065	0.116756	0.80707	0.177348	1.0518	0.199729	1.12946	0.192549	1.25363	0.118571	1.09419	0.0142024	1.17201	0.0378919	0.995076	0.00405504	0.951553	0.0966076	0.952962	0.0508678	0.970941	0.125346	0.940722	0.147518	1.01279	0.0444612	0.787246	0.0929635	0.855033	0.114661	1.02994	0.0154381	1.11062	0.0673941	1.07364	0.119277	1.02469	0.0287216	0.894707
PMM0095	PMED4_01001	similar to serum resistance locus BrkB	3.66978	0.793333	2.4	0.216048	17	1	15.0 Other categories	15.7 Other	1.28813	0.273988	0.709251	0.148712	0.757103	0.148193	1.00767	0.435005	0.809345	0.10318	0.963132	0.0582082	1.11482	0.145779	1.03692	0.00418224	0.781185	0.0205925	0.905211	0.162946	1.0741	0.203954	1.04192	0.129004	1.26566	0.272223	0.91445	0.116741	0.983	0.0312941	1.01154	0.116983	1.13045	0.114341	0.910384	0.0455898	1.06821	0.0585131	0.862595
PMM0096	PMED4_01011	inositol monophosphate family protein	14.0133	0.00966514	3.4	0.820697	12	0.462486	9.0 Purines, pyrimidines, nucleosides, and nucleotides	9.3 Pyrimidine ribonucleotide biosynthesis	1.26776	0.0501261	0.900765	0.0894243	0.837412	0.0464801	0.605765	0.0505757	0.564607	0.102461	0.641854	0.00526714	0.951119	0.215609	1.13349	0.0265797	1.11169	0.0335197	1.09934	0.016019	1.09059	0.246436	1.12219	0.0536548	1.21735	0.19699	0.960438	0.0225752	0.908998	0.0538105	0.911387	0.123843	0.719246	0.0157011	0.732599	0.0507321	0.992739	0.140631	1.08385
PMM0097	PMED4_01021	possible RND family outer membrane effluxprotein	15.6878	0.000322061	3	0.920956	12	0.94674	3.0 Cell envelope	3.1 Membranes, lipoproteins and porins	1.31891	0.298564	0.867423	0.12952	0.556476	0.105096	0.420896	0.0797558	0.487662	0.173969	0.57709	0.0128881	0.847171	0.138318	1.06953	0.152298	1.29725	0.0573834	1.31366	0.070048	1.32766	0.0903038	1.27431	0.151917	1.2011	0.344805	0.924614	0.070792	0.795272	0.0229575	0.758165	0.065066	0.670947	0.0578821	0.698527	0.00288569	0.997512	0.0253968	1.18909
PMM0098	PMED4_01031	possible Fe-S oxidoreductase	13.6026	0.0152661	1.8	0.801398	12	0.57207	15.0 Other categories	15.7 Other	0.987682	0.0360164	0.698419	0.0558432	0.575818	0.0782769	0.43447	0.0313649	0.638811	0.110872	0.721894	0.0999123	0.828734	0.223575	1.01255	0.0172414	1.13231	0.0555955	1.11255	0.067511	1.06515	0.0105844	0.968494	0.0175186	1.00095	0.243484	0.825273	0.191486	0.811832	0.00743275	0.905528	0.048006	0.78078	0.015431	0.880675	0.209561	1.12089	0.0226538	1.11102
PMM0099	PMED4_01041	conserved hypothetical protein	4.18565	0.741789	17.6	0.240206	17	1	16.0 Hypothetical	16.1 Conserved hypothetical protein	1.45852	0.228674	0.776808	0.0403129	0.807113	0.0220596	0.993206	0.0201008	0.928432	0.618908	1.022	0.192371	1.2141	0.0530266	1.16555	0.029675	1.03528	0.0330374	0.890491	0.14192	1.00613	0.0330911	1.0013	0.117788	1.13836	0.275782	0.934628	0.139687	0.915024	0.0863389	1.15155	0.148597	1.15483	0.0827533	0.967244	0.212013	0.927644	0.0165983	0.892444
PMM0100	PMED4_01051	nadB L-aspartate oxidase	6.90781	0.450652	14.8	0.406334	17	1	15.0 Other categories	15.7 Other	1.18869	0.141072	0.899993	0.0563826	1.02313	0.030021	1.04786	0.107652	1.02413	0.282623	0.929583	0.0519665	1.0872	0.0435109	1.04639	0.165933	1.01184	0.112924	0.935408	0.124904	0.890641	0.170491	0.937349	0.0140309	1.07243	0.0718245	0.902465	0.058066	0.983745	0.0541205	1.04321	0.0173194	1.14572	0.163	0.945884	0.0716776	0.944009	0.102829	0.886861
PMM0101	PMED4_01061	conserved hypothetical protein	15.8185	0.000371058	2.2	0.931524	12	0.750454	16.0 Hypothetical	16.1 Conserved hypothetical protein	1.08446	0.0578297	0.74544	0.0420959	0.588662	0.0410357	0.556366	0.131714	0.603859	0.0481713	0.695327	0.0222169	0.915785	0.0883491	1.09549	0.0161073	1.09945	0.0178652	1.25199	0.0640279	1.1632	0.0423965	1.22523	0.00237043	0.941025	0.315727	0.768738	0.0557854	0.629228	0.101928	0.810809	0.0952523	0.745445	0.0614875	0.778955	0.00150709	0.863331	0.0107822	1.13114
PMM0102	PMED4_01071	possible Fe-S oxidoreductase	15.3695	0.000919842	3	0.902679	12	0.771626	15.0 Other categories	15.7 Other	1.18623	0.171437	0.862506	0.00255208	0.707741	0.073407	0.687176	0.0123918	0.576362	0.260015	0.662028	0.0371898	0.926093	0.0739432	1.1661	0.0118482	1.16725	0.050589	1.14709	0.246463	1.18667	0.153867	1.28601	0.130382	1.11457	0.151452	0.782999	0.106087	0.771661	0.137963	0.8352	0.0955648	0.77893	0.0581745	0.680442	0.109469	0.946381	0.110848	1.01742
PMM0103	PMED4_01091	conserved hypothetical protein	10.2419	0.15184	0.8	0.600946	17	1	16.0 Hypothetical	16.1 Conserved hypothetical protein	0.799026	0.184514	0.525048	0.236546	0.477185	0.0485539	0.567048	0.0748073	0.526927	0.252282	0.853305	0.164115	0.831788	0.507966	0.964	0.255533	1.01388	0.0413345	1.01304	0.167332	1.03238	0.024901	1.00236	0.193558	0.910732	0.370372	0.882909	0.0710895	0.877316	0.0223859	1.28151	0.0294425	1.15403	0.197396	0.895616	0.106165	1.01926	0.00182075	1.34272
PMM0104	PMED4_01101	conserved hypothetical protein	11.1247	0.0978484	2.2	0.655391	12	0.526278	16.0 Hypothetical	16.1 Conserved hypothetical protein	1.05653	0.0394714	0.838821	0.0474971	0.951442	0.0809321	0.817443	0.177855	0.842305	0.0662374	0.856843	0.036513	0.958642	0.0565617	1.0229	0.131908	1.02441	0.0373559	1.03637	0.0406878	1.01796	0.101574	1.05807	0.109684	1.08754	0.167327	0.907353	0.035521	0.922976	0.0225453	1.00217	0.0719831	0.929814	0.192112	0.929136	0.0975728	1.06987	0.0769654	1.10782
PMM0105	PMED4_01111	ribG RibD/ribG C-terminal domain	15.6513	0.000312989	1.8	0.922084	11	0.961886	2.0 Biosynthesis of cofactors, prosthetic groups, and carriers	2.10 Riboflavin	1.22469	0.0201013	0.739147	0.130312	0.69646	0.229567	0.637295	0.29094	0.684589	0.139356	0.700167	0.0290337	1.1046	0.16785	1.3134	0.0740013	1.30565	0.347207	1.34374	0.00960224	1.3367	0.0395578	1.16566	0.0628737	0.912446	0.38023	0.62228	0.0598183	0.611318	0.00935999	0.65333	0.0309276	0.624853	0.0620505	0.689975	0.067877	0.993521	0.0616509	1.22494
PMM0106	PMED4_01121	6-pyruvoyl tetrahydropterin synthase	15.943	0.000426439	2.6	0.938504	12	0.714965	15.0 Other categories	15.7 Other	0.929174	0.0773659	0.798302	0.0415765	0.745013	0.197139	0.701915	0.295228	0.710385	0.143225	0.711505	0.0462634	0.960004	0.162729	1.17133	0.0860159	1.20521	0.215336	1.3107	0.140424	1.42144	0.0363713	1.31286	0.197747	1.07015	0.210294	0.862366	0.217398	0.724406	0.108687	0.74698	0.0778606	0.722317	0.179149	0.665483	0.113916	0.922111	0.000366889	1.22407
PMM0107	PMED4_01131	aroK Shikimate kinase	13.2124	0.0214472	2.6	0.777602	12	0.713521	1.0 Amino acid biosynthesis	1.1 Aromatic amino acid family	0.925626	0.141265	0.804773	0.148912	0.679539	0.134196	0.645926	0.072265	0.569281	0.16175	0.654212	0.0129023	0.852806	0.0539038	1.04044	0.0872174	0.989868	0.02183	1.12136	0.491598	1.19201	0.0958437	1.1015	0.00314374	0.963546	0.0806231	0.732591	0.056598	0.927519	0.196884	1.02705	0.0466947	0.78546	0.00185808	0.914165	0.144887	0.954494	0.142338	1.1265
PMM0108	PMED4_01141	conserved hypothetical protein	11.6124	0.0748303	17	0.669879	6	0.30392	16.0 Hypothetical	16.1 Conserved hypothetical protein	1.2329	0.373791	0.828766	0.0340657	0.815043	0.0306319	1.04331	0.181315	1.08424	0.0998995	1.13691	0.052102	1.26644	0.066786	1.16287	0.215023	0.849669	0.0924327	0.78041	0.0574541	0.897999	0.432021	0.81387	0.00529309	1.00765	0.286169	0.857299	0.0621297	0.998619	0.055288	1.12131	0.182246	1.57247	0.53638	1.135	0.0150808	1.07275	0.262326	0.951198
PMM0109	PMED4_01151	possible POLO box duplicated region.	15.3332	0.000897436	1	0.900635	10	0.789695	10.0 Regulatory functions	10.0 Regulatory functions	0.939331	0.0746315	0.741914	0.216284	0.785772	0.199768	0.673935	0.232439	0.664859	0.00452813	0.867408	0.0488976	1.10994	0.0303049	1.20226	0.0758491	1.14023	0.0153413	1.13059	0.109571	1.20179	0.0568563	0.992821	0.0308228	0.877014	0.119619	0.708456	0.0761933	0.787636	0.0655835	0.849248	0.0200567	0.823076	0.117856	0.874387	0.179627	1.14736	0.156817	1.25814
PMM0110	PMED4_01161	putative glutathione S-transferase	8.95728	0.251943	12	0.52258	18	1	2.0 Biosynthesis of cofactors, prosthetic groups, and carriers	2.12 Thioredoxin, glutaredoxin, and glutathione	1.30742	0.00707928	0.912355	0.0819866	0.940141	0.0887089	0.864122	0.0428385	0.968065	0.13763	0.956593	0.0656539	1.07847	0.0715421	0.972988	0.043611	0.86448	0.0980378	0.821561	0.021238	0.921749	0.274405	0.950345	0.019844	1.30171	0.00886584	1.10369	0.0494072	1.1165	0.0686258	1.36165	0.0313596	1.29497	0.418232	0.910287	0.0855085	1.03585	0.0576683	0.908456
PMM0111	PMED4_01171	conserved hypothetical protein	13.2617	0.0209318	0.4	0.77554	10	0.965978	16.0 Hypothetical	16.1 Conserved hypothetical protein	1.08305	0.0240379	0.551166	0.00845904	0.45402	0.171667	0.484207	0.221108	0.569011	0.224802	0.893943	0.0383344	1.01632	0.400375	1.2855	0.200243	1.1556	0.00212664	1.08399	0.0102571	1.16263	0.226967	0.927596	0.0108376	0.913497	0.0817928	0.914022	0.0589902	0.810798	0.125887	1.03412	0.0855384	0.969394	0.0634902	0.912229	0.196431	1.21024	0.0662635	1.36223
PMM0112	PMED4_01181	rbfA Ribosome-binding factor A	13.3169	0.0197211	0.2	0.778184	10	0.949689	15.0 Other categories	15.7 Other	0.937048	0.205259	0.577544	0.0787078	0.503793	0.134876	0.589591	0.0983283	0.583203	0.273281	0.978053	0.139548	1.10882	0.248404	1.37139	0.0194462	1.03911	0.228156	0.984328	0.0167611	1.06531	0.165118	1.0078	0.057319	1.08698	0.0892279	0.736264	0.0250381	0.814523	0.15675	0.955915	0.101945	1.03683	0.192015	0.974854	0.0402884	1.12789	0.112226	1.1407
PMM0113	PMED4_01191	hemD putative uroporphyrinogen III synthase	13.9486	0.0105618	23.8	0.811573	10	0.725391	2.0 Biosynthesis of cofactors, prosthetic groups, and carriers	2.3 Cobalamin, heme, phycobilin and porphyrin	0.896311	0.0675442	0.635411	0.102279	0.70753	0.0529017	0.644327	0.218418	0.744124	0.344023	0.827944	0.0625313	1.17418	0.21688	1.26483	0.124928	1.15814	0.105179	1.1215	0.0895451	1.16651	0.147561	1.08398	0.034743	0.937862	0.0723582	0.66813	0.191329	0.740461	0.0840566	0.876058	0.0102216	1.04213	0.173532	1.02497	0.0218599	1.22971	0.125919	1.3081
PMM0114	PMED4_01201	conserved hypothetical protein	10.4146	0.140502	6	0.595455	17	1	16.0 Hypothetical	16.1 Conserved hypothetical protein	1.48769	0.0691947	1.00187	0.179056	0.838585	0.053822	0.817613	0.0810657	0.81543	0.326562	0.842235	0.0591235	0.868491	0.055664	0.985031	0.0317663	0.912312	0.0528963	0.965732	0.0251928	1.15128	0.113042	1.18724	0.164498	1.17225	0.138303	1.02839	0.130895	0.947069	0.00490828	1.02723	0.0262735	1.1245	0.00395709	0.952794	0.055335	0.920242	0.0331781	0.86621
PMM0115	PMED4_01211	crtQ zeta-carotene desaturase	13.5812	0.0155509	6	0.777107	15	0.641222	2.0 Biosynthesis of cofactors, prosthetic groups, and carriers	2.2 Carotenoid	1.30419	0.168809	0.965268	0.0772602	0.8535	0.0169633	0.785122	0.0208009	0.691724	0.224881	0.781813	0.0383209	0.792063	0.0902049	0.905241	0.0432315	0.897856	0.0277995	1.02029	0.0265465	1.11132	0.046985	1.18093	0.215896	1.18726	0.180748	1.06589	0.00110054	0.931963	0.0652164	1.01812	0.02831	1.132	0.212654	0.827344	0.0540261	0.845786	0.0226677	0.918378
PMM0116	PMED4_01221	conserved hypothetical protein	15.8054	0.000366972	18.6	0.900288	6	0.972071	16.0 Hypothetical	16.1 Conserved hypothetical protein	0.828881	0.0813514	0.698308	0.0899074	0.736399	0.00527612	1.10702	0.0232951	1.15362	0.341616	1.46469	0.0634333	1.30385	0.033542	1.26389	0.065741	1.02832	0.00133454	0.848447	0.00431606	0.856254	0.048914	0.782164	0.0472521	0.854675	0.155506	0.837305	0.0648613	0.919292	0.0488072	1.40218	0.0365043	1.69482	0.235444	1.40824	0.0707186	1.29515	0.0429028	1.16157
PMM0117	PMED4_01231	conserved hypothetical protein	15.5583	0.000443131	19.6	0.882525	7	0.683122	16.0 Hypothetical	16.1 Conserved hypothetical protein	1.02203	0.0201418	0.664898	0.0257694	0.720086	0.0300011	1.09005	0.065581	0.91265	0.539121	1.53079	0.192992	1.52943	0.163109	1.36018	0.1199	1.12781	0.0224157	0.913866	0.106537	0.817781	0.080312	0.747691	0.0709074	0.806704	0.070907	0.637135	0.0586861	0.646611	0.0573434	1.15762	0.0307018	1.49063	0.399334	1.34165	0.0935479	1.28929	0.0233214	1.25072
PMM0118	PMED4_01241	conserved hypothetical protein	12.6439	0.0348602	23.4	0.732531	9	0.752985	16.0 Hypothetical	16.1 Conserved hypothetical protein	1.13565	0.0945775	0.690045	0.00437707	0.740983	0.0223576	0.79082	0.149348	0.92597	0.170596	1.09227	0.0825182	1.07977	0.0391404	1.17703	0.142885	1.13003	0.102857	1.00242	0.0712987	1.0536	0.176846	0.962996	0.0222188	0.994486	0.0490578	0.782833	0.0251675	0.787055	0.110335	0.961638	0.092967	0.995045	0.0292316	0.91581	0.0554315	1.17188	0.0370857	1.14004
PMM0119	PMED4_01251	conserved hypothetical protein	14.5705	0.00523514	2.8	0.856957	12	0.648805	16.0 Hypothetical	16.1 Conserved hypothetical protein	1.06723	0.0211223	0.882529	0.0594832	0.867642	0.240001	0.746414	0.105171	0.746959	0.034832	0.750965	0.0536185	1.02605	0.0224704	1.24141	0.155949	1.05832	0.134824	1.16081	0.0587963	1.25178	0.0696543	0.951622	0.0375201	0.986349	0.174007	1.02825	0.0736035	0.912076	0.0241513	0.806209	0.0534979	0.858596	0.160974	0.784365	0.142376	0.861597	0.0708293	1.02875
PMM0120	PMED4_01261	putative cell division inhibitor	15.8653	0.000384615	18.6	0.903293	6	0.804882	4.0 Cellular processes	4.1 Cell division	0.559591	0.0564077	0.522838	0.109588	0.955708	0.0586956	0.953598	0.180199	1.43085	0.0328035	1.26976	0.132003	1.20396	0.350445	1.09364	0.186179	1.03213	0.0403915	0.871011	0.0758139	0.658791	0.0739595	0.494438	0.0841503	0.585452	0.0875956	0.660047	0.10478	1.05237	0.0732071	1.63878	0.196095	1.78648	0.2329	1.75084	0.202701	1.53073	0.0950291	1.37931
PMM0121	PMED4_01271	conserved hypothetical protein	11.7382	0.0696665	20.2	0.665406	8	0.410054	16.0 Hypothetical	16.1 Conserved hypothetical protein	0.939483	0.021978	0.882574	0.0661133	0.707173	0.083388	0.73408	0.30678	0.7997	0.340611	1.07672	0.0757688	1.09232	0.0508534	1.17271	0.0460078	0.936003	0.0798286	0.966872	0.0965852	1.02909	0.0198216	0.999351	0.0690361	0.90637	0.179837	0.871616	0.0709385	0.984084	0.104119	1.25976	0.105143	1.00604	0.259065	1.03893	0.173799	1.20721	0.137042	1.13229
PMM0122	PMED4_01281	possible heat shock protein DnaJ	13.5898	0.0153739	20.6	0.771244	8	0.933505	4.0 Cellular processes	4.3 Chaperones	0.921826	0.213728	0.59161	0.092167	0.622374	0.0151593	0.827121	0.24401	0.872333	0.0947023	1.12917	0.0754272	1.09997	0.163681	1.25566	0.0800966	1.11685	0.155066	0.846067	0.0688586	0.809885	0.258367	0.669717	0.0189589	0.882238	0.0376936	0.785615	0.0191899	1.03407	0.153243	1.22637	0.0963016	1.52837	0.0750842	1.3749	0.0609149	1.49962	0.026791	1.48442
PMM0123	PMED4_01291	cysK2 O-acetylserine (thiol)-lyase A	14.6169	0.00467626	19.6	0.82912	8	0.43933	1.0 Amino acid biosynthesis	1.5 Serine family / Sulfur assimilation	0.748189	0.0200506	0.591721	0.0597681	0.771209	0.055303	0.913422	0.0394571	1.00031	0.383665	1.2755	0.07625	1.3101	0.18641	1.40253	0.0035893	1.09472	0.18886	0.904914	0.190637	0.876516	0.0981494	0.835464	0.0173445	0.904145	0.123711	0.862919	0.0015237	1.04715	0.0892841	1.58081	0.00428545	1.80926	0.271887	1.8857	0.137392	1.59813	0.165637	1.65134
PMM0124	PMED4_01301	conserved hypothetical protein in cyanobacteria	11.7305	0.0697515	3.4	0.686896	12	0.403217	16.0 Hypothetical	16.1 Conserved hypothetical protein	1.16853	0.0595064	0.847496	0.171036	0.894545	0.0959609	0.888124	0.0905237	0.695345	0.328804	0.938776	0.108991	0.942252	0.336751	1.02642	0.114609	1.13854	0.272138	1.14646	0.0306221	1.37923	1.95463e-05	1.10225	0.0226543	1.03552	0.350777	0.929838	0.151015	1.00344	0.226531	1.17626	0.0100875	0.940459	0.0598127	0.814742	0.108215	0.900359	0.206818	0.949861
PMM0125	PMED4_01311	possible ABC transporter, ATP-binding component	4.70113	0.690818	18.6	0.267734	17	1	14.0 Transport and binding proteins	14.0 Transport and binding proteins	1.24075	0.0816468	0.967189	0.108078	1.02758	0.0486724	1.01377	0.04184	0.924356	0.184149	1.01902	0.102769	1.0728	0.0664803	1.03911	0.0616877	1.07264	0.0416315	1.01681	0.109241	1.09995	0.142808	1.00653	0.197021	0.921587	0.0865181	0.781314	0.0842484	0.863356	0.00426549	1.10849	0.00990059	1.13726	0.0201263	0.952206	0.0352011	1.03454	0.120007	0.916435
PMM0126	PMED4_01321	possible Herpesvirus UL6 like	8.42681	0.301325	22.2	0.482974	17	1	15.0 Other categories	15.7 Other	0.904666	0.135209	0.755961	0.030376	0.61759	0.0845585	0.725301	0.103347	0.804745	0.256993	0.932135	0.00153499	1.08524	0.13067	1.11236	0.163631	0.915886	0.159955	0.940371	0.0907724	1.00206	0.076953	1.04535	0.102654	0.967983	0.116477	0.921475	0.195362	0.934101	0.0143732	1.23757	0.0948138	1.19239	0.127484	1.02444	0.00684099	1.06984	0.0380929	1.10062
PMM0127	PMED4_01331	possible Signal peptide binding domain	11.8106	0.0666667	16.6	0.684959	4	0.386944	10.0 Regulatory functions	10.0 Regulatory functions	1.08545	0.25272	0.794491	0.231441	0.807637	0.259815	0.933649	0.0798047	0.917206	0.674087	1.26458	0.163727	1.08004	0.340584	0.947212	0.148441	0.859434	0.103627	0.895332	0.266448	0.894532	0.0368129	0.914202	0.0364725	0.955384	0.447349	0.754172	0.336236	1.18841	0.198364	1.69338	0.107117	1.61166	0.481974	1.13062	0.128491	1.33256	0.0808706	0.897734
PMM0128	PMED4_01341	rpaA two-component response regulator	10.4041	0.141249	15.2	0.610442	17	1	10.0 Regulatory functions	10.0 Regulatory functions	1.18057	0.0400156	1.72786	0.134181	1.24676	0.100333	0.938197	0.0270309	0.740185	0.273528	0.921515	0.00622484	1.16425	0.0906559	1.51979	0.0297406	0.899963	0.0181138	0.505802	0.0569696	0.47667	0.0125487	0.476332	0.0543547	1.26247	0.348173	1.64459	0.250348	1.55588	0.162339	1.24313	0.183291	1.09139	0.27689	0.909014	0.053023	1.12467	0.0896723	1.63
PMM0129	PMED4_01351	holB DNA polymerase III, delta prime subunit	9.62091	0.196339	1.8	0.566804	18	1	11.0 DNA replication, recombination, and repair	11.0 DNA replication, recombination, and repair	1.06899	0.0634989	0.84072	0.0977842	0.769019	0.146162	0.595467	0.0315768	0.654632	0.187444	0.835031	0.0195112	1.06283	0.36187	1.05453	0.167148	0.943188	0.0557423	1.05083	0.00523576	1.07834	0.372957	1.04691	0.0435227	1.01337	0.0677696	0.860058	0.108182	0.990454	0.331661	1.02621	0.00106691	1.07081	0.319085	0.912057	0.0117872	1.06486	0.0577637	1.09501
PMM0130	PMED4_01361	Thymidylate kinase	7.57569	0.383419	21.8	0.432861	18	1	15.0 Other categories	15.7 Other	1.17839	0.0212498	0.80358	0.139665	0.758144	0.0489022	0.792054	0.057035	0.819169	0.103878	1.01673	0.0593063	1.09527	0.0240932	1.06217	0.158357	0.909537	0.0320232	0.890777	0.202782	0.928748	0.153039	0.882238	0.0581046	1.02295	0.029558	0.933923	0.145509	0.794128	0.156107	1.17391	0.194875	1.16308	0.255226	1.13724	0.0585407	1.13306	0.0555214	1.0105
PMM0131	PMED4_01371	putative P-type ATPase transporter for copper	10.9575	0.107288	22	0.626414	17	1	10.0 Regulatory functions	10.0 Regulatory functions	1.00675	0.00505849	0.794017	0.0547848	0.757611	0.101382	0.852975	0.13963	0.999127	0.0457879	0.987618	0.0907195	1.13697	0.199508	1.17201	0.100056	0.969005	0.0653113	0.947165	0.090117	0.963019	0.0269929	0.988769	0.130078	1.00945	0.228482	0.787711	0.138897	0.854407	0.0526836	1.0741	0.0488638	1.15572	0.00935493	0.992288	0.00639781	1.01922	0.0471367	1.04242
PMM0132	PMED4_01381	cyanobacterial conserved hypothetical	10.155	0.157105	3.4	0.595157	17	1	15.0 Other categories	15.7 Other	0.852249	0.352547	0.901651	0.147085	0.823168	0.0232568	0.773885	0.225696	0.605811	0.379516	0.91286	0.0330328	0.858241	0.124595	0.979926	0.071978	0.924464	0.211389	1.11077	0.0882525	1.16267	0.01428	1.18309	0.071593	1.27431	0.251559	0.912752	0.11309	0.798966	0.124925	1.14996	0.258654	0.970304	0.113814	0.831496	0.0661568	0.9713	0.0731956	1.01204
PMM0133	PMED4_01391	radA putative DNA repair protein RadA	15.2656	0.000851582	17.6	0.876672	5	0.584961	15.0 Other categories	15.3 Radiation sensitivity	0.816147	0.285556	0.481767	0.043753	0.890878	0.000149287	1.59964	0.827153	1.88042	0.439257	2.39864	0.366154	1.54567	0.225027	1.11529	0.188894	0.750724	0.215815	0.697284	0.200008	0.857352	0.201058	0.608741	0.0538057	0.706747	0.187861	0.610106	0.081609	1.16734	0.101787	2.78492	0.351815	3.10318	0.220675	2.49815	0.0433739	1.84677	0.0362416	1.22835
PMM0134	PMED4_01401	rpaB two-component response regulator	16.494	0	3.8	0.963065	13	0.96081	10.0 Regulatory functions	10.0 Regulatory functions	1.09619	0.0663952	0.932285	0.0791977	0.544714	0.0998487	0.36143	0.100317	0.206449	0.184784	0.374693	0.0438447	0.723455	0.0825135	0.959493	0.157354	1.26509	0.00220613	1.37243	0.0262234	1.41069	0.0571967	1.36629	0.0851836	1.16029	0.0803822	0.954496	0.0346728	0.647959	0.0644356	0.560943	0.0976858	0.396706	0.0430949	0.416792	0.0313852	0.659357	0.15011	1.05551
PMM0135	PMED4_01411	plsX fatty acid/phospholipid synthesis protein PlsX	16.6077	0	3.8	0.969833	13	0.98091	7.0 Fatty acid, phospholipid and sterol metabolism	7.0 Fatty acid, phospholipid and sterol metabolism	1.33154	0.12289	0.966403	0.0476253	0.659163	0.0302819	0.527828	0.027274	0.45186	0.0251371	0.508411	0.00957995	0.760258	0.0314515	1.03389	0.0176482	1.23435	0.051997	1.26729	0.0687096	1.24877	0.0298056	1.34051	0.0499683	1.06379	0.0742031	0.884856	0.0241841	0.699861	0.0637074	0.555232	0.0542083	0.480584	0.0554904	0.529477	0.0274329	0.735129	0.0723297	0.946637
PMM0136	PMED4_01421	fabH 3-oxoacyl-[acyl-carrier-protein] synthase III	14.0426	0.00911877	5.2	0.809442	15	0.885314	7.0 Fatty acid, phospholipid and sterol metabolism	7.0 Fatty acid, phospholipid and sterol metabolism	1.31413	0.0967462	0.930048	0.101046	0.928049	0.210111	0.660409	0.180419	0.691638	0.125079	0.780283	0.0225027	0.811171	0.0260445	0.840557	0.0468423	1.02805	0.0450441	1.09225	0.125161	1.12629	0.18543	1.15638	0.0463368	1.25878	0.275808	1.053	0.157289	1.02848	0.101641	1.0412	0.0866097	0.896436	0.0180675	0.816939	0.00289591	0.86631	0.0124782	0.881209
PMM0137	PMED4_01431	fabD Malonyl coenzyme A-acyl carrier proteintransacylase	16.5087	0	7.4	0.936812	1	0.853186	7.0 Fatty acid, phospholipid and sterol metabolism	7.0 Fatty acid, phospholipid and sterol metabolism	2.51134	0.0657623	1.87582	0.246139	1.2747	0.280071	0.847951	0.3047	0.621235	0.074902	0.617525	0.0546172	0.676608	0.086889	0.698688	0.00442704	0.766375	0.201527	0.989917	0.0621199	1.30954	0.00413032	1.55581	0.141163	1.897	0.073734	1.51392	0.140383	1.09935	0.042008	0.79359	0.056067	0.671181	0.0593155	0.615767	0.0118949	0.628164	0.0715922	0.659331
PMM0138	PMED4_01441	plsC putative 1-acyl-sn-glycerol-3-phosphateacyltransferase	14.2029	0.0075818	5.6	0.814977	16	0.565593	7.0 Fatty acid, phospholipid and sterol metabolism	7.0 Fatty acid, phospholipid and sterol metabolism	1.7212	0.352003	1.2389	0.571048	0.928179	0.0349099	0.941073	0.119469	0.652559	0.231639	0.876597	0.00773189	0.882011	0.115111	1.07726	0.0863759	0.961273	0.161794	1.05492	0.169445	1.29161	0.0213436	1.38803	0.194033	1.63894	0.298644	1.02457	0.350451	0.946176	0.0497908	0.870837	0.0122029	0.892219	0.0319618	0.737357	0.133115	0.930527	0.190437	0.960495
PMM0139	PMED4_01451	conserved hypothetical protein	11.9404	0.0615176	5	0.689348	15	0.503391	16.0 Hypothetical	16.1 Conserved hypothetical protein	1.48277	0.0469449	0.970484	0.0396196	0.875338	0.0225306	0.825387	0.184931	0.764796	0.254677	0.801674	0.173567	0.919794	0.08046	1.09126	0.00697519	0.980631	0.111459	0.998185	0.0263058	1.12745	0.0668374	1.27278	0.067939	1.16083	0.156227	0.952231	0.0667414	1.00793	0.0205959	1.06962	0.129023	0.888882	0.0951471	0.792987	0.0224039	0.962358	0.150363	0.926133
PMM0140	PMED4_01461	ycf34 putative Ycf34	13.9764	0.0104827	10.4	0.801758	2	0.575453	10.0 Regulatory functions	10.0 Regulatory functions	1.4808	0.150672	1.13269	0.0388356	0.916326	0.375402	0.736329	0.434284	0.651333	0.687256	0.88086	0.0861601	0.857158	0.0369578	0.890737	0.0235494	0.767028	0.0150095	0.813157	0.0281073	1.05177	0.119664	1.15324	0.111862	1.15799	0.0180205	1.09016	0.0716149	1.51659	0.00618077	1.3022	0.0947737	1.08389	0.135426	0.835799	0.0736167	0.708892	0.0103392	0.716608
PMM0141	PMED4_01471	Poly A polymerase family	15.5302	0.000434783	21.2	0.883194	8	0.671567	12.0 Transcription	12.2 RNA synthesis, modification, and DNA transcription	0.903305	0.0819597	0.745885	0.0861861	0.870092	0.130264	1.00547	0.235428	1.00712	0.164117	1.20493	0.203699	1.1666	0.242748	1.25038	0.0468535	1.02691	0.129902	0.965086	0.123553	0.949368	0.0039219	0.960564	0.172478	0.796917	0.03612	0.810895	0.122276	0.839989	0.0401155	1.06397	0.0254844	1.12003	0.0470398	1.05088	0.0295435	1.18234	0.275949	1.19411
PMM0142	PMED4_01481	RNA-binding region RNP-1 (RNA recognition motif)	16.7086	0	6	0.955949	16	0.993082	7.0 Fatty acid, phospholipid and sterol metabolism	7.0 Fatty acid, phospholipid and sterol metabolism	1.47572	0.130707	1.49269	0.0637863	0.953164	0.0629793	0.765835	0.143467	0.491084	0.185547	0.591956	0.0572016	0.77346	0.0123292	0.849604	0.0185706	0.983282	0.073051	1.20769	0.113875	1.37441	0.0569696	1.55229	0.157601	1.33538	0.263553	1.17923	0.276469	0.977422	0.197856	0.843536	0.066945	0.561484	0.0604959	0.49731	0.0234027	0.639813	0.0523708	0.820342
PMM0143	PMED4_01491	crtB,pys Squalene and phytoene synthases	11.9828	0.0598361	21	0.680898	8	0.818384	2.0 Biosynthesis of cofactors, prosthetic groups, and carriers	2.2 Carotenoid	0.91194	0.0365797	0.643976	0.131051	0.696684	0.105291	0.849023	0.00126787	0.907908	0.0582189	1.27732	0.0363202	1.13328	0.23588	1.12754	0.113206	0.992351	0.16383	1.07932	0.121536	0.995687	0.19387	1	0.000781571	1.01184	0.122582	0.847642	0.153874	0.883155	0.0765731	1.29411	0.0968323	1.37647	0.177503	1.2148	0.0724066	1.16178	0.0173989	1.09212
PMM0144	PMED4_01501	pds,crtD phytoene desaturase	14.8785	0.00341365	14.8	0.874595	4	0.96979	2.0 Biosynthesis of cofactors, prosthetic groups, and carriers	2.2 Carotenoid	0.993055	0.0020217	0.933999	0.137844	1.07985	0.109192	1.087	0.21592	1.29546	0.305318	1.31899	0.15748	1.01889	0.0080342	0.839952	0.0510663	0.603494	0.0693204	0.631606	0.0727487	0.677163	0.0625574	0.691688	0.160027	1.20841	0.14282	1.09761	0.114379	1.22764	0.0015526	1.55359	0.0544602	1.78567	0.233545	1.40667	0.0192173	1.18101	0.0483132	0.876329
PMM0145	PMED4_01511	conserved hypothetical protein	15.7147	0.000334448	18.4	0.896392	6	0.933471	16.0 Hypothetical	16.1 Conserved hypothetical protein	0.521866	0.0587872	0.664605	0.000799742	0.81217	0.00363277	1.07502	0.265159	1.30329	0.289304	2.03553	0.0762063	1.41227	0.426259	1.35557	0.249563	0.883974	0.180338	0.832048	0.0827748	0.71116	0.0566624	0.630973	0.0560785	0.74051	0.151549	0.754135	0.11014	1.17515	0.0214308	2.16397	0.280237	2.42122	0.3533	2.19218	0.131298	1.85918	0.14185	1.55545
PMM0146	PMED4_01521	conserved hypothetical protein	17.1734	0	18	0.98274	5	0.968631	16.0 Hypothetical	16.1 Conserved hypothetical protein	0.651446	0.00290975	0.766199	0.0195179	1.04217	0.0642466	1.49887	0.128381	1.723	0.372218	2.02627	0.135325	1.70942	0.0500865	1.51433	0.0051146	1.03465	0.046592	0.883554	0.0582406	0.719837	0.0131414	0.632542	0.0239496	0.712093	0.0847717	0.680457	0.08672	0.915634	0.144	1.68644	0.352036	2.05368	0.598025	1.94684	0.221992	1.69467	0.0255209	1.35326
PMM0147	PMED4_01531	rbcR putative Rubisco transcriptional regulator	14.651	0.00456621	1.6	0.862846	10	0.49208	10.0 Regulatory functions	10.0 Regulatory functions	0.819869	0.0267963	0.587128	0.0450596	0.571466	0.0919507	0.543076	0.0343662	0.527859	0.1308	0.728591	0.0204512	0.867355	0.0938332	1.22973	0.0469644	1.19387	0.064267	1.24116	0.0502737	1.17582	0.0899644	1.03951	0.000150042	0.965817	0.282634	0.884441	0.111759	0.788814	0.0209245	0.921357	0.242074	0.814988	0.078072	0.766474	0.0978734	0.979388	0.0742408	1.33677
PMM0148	PMED4_01541	conserved hypothetical protein	15.8931	0.000400802	2.6	0.935489	12	0.924836	16.0 Hypothetical	16.1 Conserved hypothetical protein	0.983569	0.0828368	0.746035	0.168362	0.932656	0.52132	0.737558	0.175076	0.771567	0.213608	0.726907	0.102994	0.927223	0.0250311	1.06437	0.0222248	1.055	0.0305138	1.1977	0.13603	1.23591	0.0148686	1.21185	0.0764879	0.949783	0.212143	0.824013	0.174028	0.787335	0.0410136	0.813782	0.0222416	0.755891	0.12714	0.722287	0.0419695	0.951847	0.225639	1.0728
PMM0149	PMED4_01551	ndhF putative NADH Dehydrogenase (complex I) subunit(chain 5)	0.899517	0.986314	10.6	0.051714	17	1	8.0 Photosynthesis and respiration	8.4 NADH dehydrogenase	0.930985	0.0899643	0.936292	0.116165	1.0191	0.423906	1.17412	0.483002	1.26511	0.222679	0.983067	0.0751292	0.936809	0.0302877	0.938012	0.00636224	0.98169	0.0480633	1.00911	0.0862061	1.07901	0.106695	1.05535	0.122867	1.01778	0.188165	1.03858	0.0816139	1.07179	0.0584392	1.24512	0.0479436	1.23309	0.139945	0.98912	0.00897285	0.879072	0.0408269	0.91279
PMM0150	PMED4_01561	ndhD putative NADH dehydrogenase subunit (chain 4)	16.9604	0	18.4	0.96761	5	0.919575	8.0 Photosynthesis and respiration	8.4 NADH dehydrogenase	0.402629	0.0932925	0.39255	0.0215849	0.987346	0.132628	2.27579	0.562386	2.63029	0.447849	2.75623	0.614671	2.51027	0.0722551	1.75035	0.406332	0.999937	0.0158823	0.756185	0.0475272	0.555335	0.0586466	0.446283	0.0125028	0.3647	0.020416	0.390522	0.0551662	1.03936	0.139467	2.32321	0.193739	2.95289	0.383129	2.85382	0.214577	2.00207	0.153118	1.50351
PMM0151	PMED4_01571	conserved hypothetical protein	15.3451	0.000902062	18.8	0.873178	6	0.911972	16.0 Hypothetical	16.1 Conserved hypothetical protein	0.667263	0.0702719	0.45187	0.082178	0.846675	0.179021	1.38425	0.0269839	1.59382	0.574457	2.06661	0.271262	1.99407	0.206755	1.27127	0.120371	0.914703	0.162054	0.904416	0.15288	0.822239	0.0759455	0.744662	0.121114	0.768952	0.0341753	0.539766	0.0552499	0.867082	0.1091	1.91766	0.200367	2.07188	0.280062	2.00868	0.0177768	1.93746	0.139603	1.17143
PMM0152	PMED4_01581	Putative sugar-phosphate nucleotidyl transferase	16.3017	0.000306748	3.6	0.954217	13	0.910843	14.0 Transport and binding proteins	14.0 Transport and binding proteins	1.31476	0.187627	0.898742	0.00499219	0.738961	0.0478822	0.599552	0.0393776	0.477162	0.114626	0.645712	0.0240965	0.888022	0.0579386	1.19121	0.00694972	1.22196	0.0275112	1.26934	0.0104167	1.43803	0.0426366	1.41777	0.105608	1.09887	0.161553	0.891728	0.128546	0.77656	0.0288712	0.688067	0.00350507	0.624227	0.0513468	0.602256	0.0335372	0.896262	0.0839141	1.0649
PMM0153	PMED4_01591	conserved hypothetical protein	15.5507	0.000441826	4.2	0.90549	15	0.920513	16.0 Hypothetical	16.1 Conserved hypothetical protein	1.42752	0.0855851	0.829421	0.108998	0.761738	0.0523017	0.418842	0.00111071	0.433955	0.187263	0.60627	0.0655274	0.865614	0.0564043	0.978446	0.0299396	1.0285	0.0406661	1.22739	0.101753	1.34473	0.0702745	1.45138	0.149475	1.27872	0.00938728	1.03358	0.0334021	0.834174	0.0300336	0.79632	0.0205745	0.569669	0.0503764	0.62172	0.0396064	0.853686	0.0718737	0.972631
PMM0154	PMED4_01601	Bacterial regulatory protein, LuxR family	14.1452	0.00854902	14.8	0.831485	4	0.777266	10.0 Regulatory functions	10.0 Regulatory functions	1.08891	0.0782744	1.0049	0.0152034	0.978768	0.184906	1.30606	0.383653	1.05957	0.577803	1.18531	0.0555469	1.13461	0.0434352	1.08861	0.00996635	0.898756	0.0936747	0.875643	0.0151549	0.873124	0.0383782	1.00538	0.0126847	0.980219	0.15126	0.985456	0.0555519	1.19818	0.193855	1.53747	0.181989	1.37611	0.168557	1.07501	0.0253587	0.89315	0.0575729	0.833963
PMM0155	PMED4_01611	conserved hypothetical protein	11.461	0.0799796	22.6	0.658529	8	0.51544	16.0 Hypothetical	16.1 Conserved hypothetical protein	0.983282	0.0683944	0.590886	0.14922	0.563038	0.0327477	0.781686	0.0506723	0.800642	0.241737	1.02164	0.0419366	1.10596	0.0560954	1.04127	0.150279	1.00419	0.100002	1.14557	0.134017	1.10197	0.077762	0.932181	0.0967646	0.852134	0.0799977	0.807657	0.0966949	0.825058	0.0719877	1.24539	0.0663725	1.17839	0.00361798	1.04421	0.189975	1.12338	0.0437899	1.076
PMM0156	PMED4_01621	predicted inorganic polyphosphate / ATP-NAD+kinase	11.5883	0.0754422	0.4	0.677357	10	0.628817	5.0 Central intermediary metabolism	5.1 Phosphorus compounds	1.00895	0.00664635	0.690981	0.0151999	0.51182	0.0263466	0.572402	0.102894	0.786511	0.24228	0.932066	0.106123	1.16027	0.01723	1.0914	0.142192	0.984054	0.106276	0.956309	0.020796	1.14896	0.0622618	1.25184	0.442498	0.863831	0.228068	0.623004	0.0686344	0.810688	0.0183988	0.911275	0.177278	1.08088	0.165841	0.95531	0.084908	1.13246	0.0351898	1.15866
PMM0157	PMED4_01631	ndhE putative NADH Dehydrogenase subunit	13.89	0.0114328	21.4	0.791275	9	0.710549	8.0 Photosynthesis and respiration	8.4 NADH dehydrogenase	1.09835	0.0112207	0.741612	0.00722581	0.505446	0.242219	0.731862	0.0631394	0.628621	0.416635	1.25354	0.0705018	1.49199	0.0967803	1.26969	0.188308	0.962831	0.0628562	0.95626	0.0585337	0.986396	0.116978	0.899729	0.0541056	0.823607	0.132035	0.632211	0.0878746	0.737373	0.0198004	0.989922	0.0838787	1.2181	0.213876	1.21264	0.0322411	1.29184	0.0870434	1.25036
PMM0158	PMED4_01641	ndhG putative NADH Dehydrogenase (complex I) subunit(chain 6)	14.0159	0.00967251	20.4	0.795041	7	0.543106	8.0 Photosynthesis and respiration	8.4 NADH dehydrogenase	0.992172	0.00364516	0.549632	0.058808	0.56883	0.0666729	0.87531	0.107735	1.23605	0.310232	1.29565	0.319085	1.5234	0.0697555	1.35132	0.160723	1.01571	0.144637	0.942153	0.163514	0.931499	0.101331	0.808513	0.0569317	0.857657	0.00551326	0.711018	0.158634	0.776252	0.0294018	0.956324	0.0675609	1.35187	0.255124	1.23988	0.054967	1.4032	0.0351138	1.1806
PMM0159	PMED4_01651	ndhI putative NADH Dehydrogenase subunit	12.46	0.0416522	19.6	0.706606	8	0.594917	8.0 Photosynthesis and respiration	8.4 NADH dehydrogenase	0.779397	0.0323301	0.466322	0.0916541	0.619975	0.235961	0.974622	0.238302	1.30141	0.216133	1.39445	0.0389295	1.28268	0.128891	1.15946	0.0547079	0.97039	0.0545255	0.828425	0.0357075	0.859318	0.122108	0.774635	0.0656099	0.968907	0.00256906	0.936484	0.0792786	0.897019	0.0679748	1.40764	0.00518668	1.67679	0.316823	1.44383	0.134207	1.39286	0.059199	1.27099
PMM0160	PMED4_01661	ndhA putative respiratory-chain NADH dehydrogenasesubunit	16.8084	0	19.4	0.953455	7	0.69492	8.0 Photosynthesis and respiration	8.4 NADH dehydrogenase	0.761686	0.129572	0.507414	0.0651079	0.822739	0.153573	1.154	0.239399	1.52959	0.0540572	1.93459	0.144783	1.88267	0.149439	1.71086	0.0514518	1.24229	0.0302047	0.997096	0.00679396	0.821096	0.0777172	0.724327	0.0952522	0.666566	0.0872939	0.579317	0.0717461	0.843052	0.0288934	1.33934	0.128772	1.87898	0.274311	1.80978	0.0341047	1.7226	0.179162	1.44899
PMM0161	PMED4_01671	gltA Citrate synthase	16.9429	0	19.8	0.960769	7	0.789365	6.0 Energy metabolism	6.6 TCA cycle	0.497585	0.0843101	0.376119	0.0847848	0.654997	0.0358752	1.03039	0.00891223	1.24576	0.431272	1.60986	0.0424031	1.76875	0.0469437	1.5569	0.0486618	1.22228	0.0691394	0.908357	0.116276	0.744243	0.120899	0.516805	0.0369629	0.395946	0.0354161	0.359202	0.0019588	0.738328	0.0248194	1.386	0.0187958	1.57604	0.0604242	1.74365	0.116446	1.74198	0.12161	1.53344
PMM0162	PMED4_01681	possible predicted using hexExon; MAL3P6.11(PFC0760c), Hypot...	12.9389	0.0271028	18.6	0.737166	6	0.57927	15.0 Other categories	15.7 Other	0.947699	0.034161	0.843204	0.0463945	0.884041	0.127601	1.00299	0.123916	1.12714	0.0581469	1.17802	0.0465778	1.11212	0.212856	1.02958	0.0113805	0.978089	0.0181088	0.971629	0.0353359	0.978451	0.0634137	0.973505	0.0412054	0.928746	0.0867204	0.87397	0.0356917	0.91262	0.0430738	1.47306	0.0380596	1.17944	0.253201	1.22095	0.0528393	1.22091	0.144035	1.06051
PMM0163	PMED4_01691	conserved hypothetical protein	15.7012	0.000327869	5.2	0.904259	16	0.965309	16.0 Hypothetical	16.1 Conserved hypothetical protein	1.50922	0.0635951	1.16659	0.0283974	0.746472	0.22308	0.605406	0.136924	0.371159	0.481863	0.621073	0.0757848	0.781254	0.0635619	1.04042	0.0172804	1.02033	0.0861902	1.16112	0.0507776	1.25531	0.0475992	1.42557	0.0180651	1.23736	0.439828	1.13019	0.0804184	0.999443	0.026032	0.797582	0.00423021	0.647273	0.0266419	0.556563	0.0136726	0.701248	0.02467	0.880515
PMM0164	PMED4_01701	trpB Tryptophan synthase, betachain	16.3937	0.000371747	18.4	0.934732	6	0.906043	1.0 Amino acid biosynthesis	1.1 Aromatic amino acid family	0.730672	0.0113502	0.602945	0.120023	0.897279	0.0650141	1.31838	0.13398	1.31662	0.244585	1.65172	0.0352503	1.41721	0.196307	1.3705	0.0768352	1.00649	0.0814355	0.85478	0.0807264	0.772516	0.0786692	0.651472	0.0114118	0.680208	0.0914577	0.69147	0.0765765	1.00658	0.105408	1.86367	0.367719	1.93414	0.335414	1.78297	0.111261	1.44636	0.00175661	1.39261
PMM0165	PMED4_01711	Translation initiation factor SUI1	9.78672	0.183694	20.8	0.55565	18	1	13.0 Translation	13.5 Protein modification and translation factors	1.04942	0.200509	0.894443	0.0623905	0.901852	0.0184787	0.766548	0.110414	0.941651	0.227524	0.946534	0.101212	1.05021	0.214597	1.20409	0.149186	1.09314	0.0638855	0.897874	0.135442	0.981656	0.15913	0.80497	0.100053	0.94024	0.111189	0.826772	0.131577	1.10535	0.0662385	1.31307	0.367708	1.16818	0.151667	0.967002	0.0403966	1.25713	0.266732	1.14508
PMM0166	PMED4_01721	cysC Adenylylsulfate kinase	16.3299	0.000322581	4.2	0.950636	13	0.733218	1.0 Amino acid biosynthesis	1.5 Serine family / Sulfur assimilation	1.20599	0.148013	1.00404	0.191928	0.682094	0.0239843	0.459991	0.0993265	0.247937	0.0767828	0.343334	0.00367473	0.69093	0.200877	0.997991	0.0674541	1.08625	0.117262	1.34463	0.0781245	1.53576	0.076103	1.54571	0.156065	1.20797	0.389952	1.01809	0.215315	0.778008	0.132488	0.563065	0.0298666	0.349722	0.128465	0.390155	0.0707271	0.689399	0.201374	1.04909
PMM0167	PMED4_01731	purE Phosphoribosylaminoimidazole carboxylase	16.3979	0.000374532	18	0.938401	5	0.69462	9.0 Purines, pyrimidines, nucleosides, and nucleotides	9.2 Purine ribonucleotide biosynthesis	0.693986	0.129823	0.657342	0.135115	1.00715	0.139164	2.00554	0.639018	2.55503	0.808124	3.61503	0.201104	2.20986	0.3944	1.58913	0.250099	0.96227	0.000335784	0.912856	0.153658	0.77682	0.208896	0.667184	0.0288972	0.745046	0.103106	0.631214	0.0284862	1.00615	0.0181995	2.82583	0.282882	3.39173	0.474995	3.73259	0.0845051	2.82675	0.156738	1.46922
PMM0168	PMED4_01741	chlM Mg-protoporphyrin IX methyltransferase	15.2847	0.000861009	5.6	0.877451	15	0.767585	2.0 Biosynthesis of cofactors, prosthetic groups, and carriers	2.3 Cobalamin, heme, phycobilin and porphyrin	1.22243	0.353034	1.05105	0.26782	0.824823	0.0748098	0.510547	0.19138	0.435187	0.24516	0.609188	0.00441991	0.647348	0.169376	0.714029	0.12369	0.764862	0.299844	1.14943	0.0243778	1.46815	0.0816199	1.62625	0.247051	1.48485	0.777361	1.1999	0.244114	1.03667	0.155977	0.974406	0.00297136	0.842602	0.261683	0.585098	0.127652	0.748378	0.0935532	0.77406
PMM0169	PMED4_01751	two-component response regulator	12.239	0.0505401	22.2	0.701653	8	0.781396	10.0 Regulatory functions	10.0 Regulatory functions	0.931333	0.177894	0.544824	0.0813354	0.599567	0.0151981	0.833239	0.0064425	0.804236	0.14993	1.03942	0.0171473	1.03948	0.11232	1.07777	0.0890471	0.956407	0.106038	1.01427	0.0855358	1.00296	0.0333791	0.890106	0.143023	0.772803	0.211762	0.743302	0.0347912	0.796669	0.120108	1.25368	0.167836	1.16403	0.335131	1.18132	0.178167	1.25387	0.0717003	1.2482
PMM0170	PMED4_01761	NifS-like aminotransferase class-V	13.1051	0.0237212	20.6	0.743746	8	0.557879	15.0 Other categories	15.7 Other	0.946329	0.0179697	0.522016	0.157693	0.64696	0.16012	0.708757	0.0258007	0.877967	0.35957	1.10769	0.162842	1.50884	0.0281141	1.37249	0.135696	1.01714	0.0112857	0.899227	0.137293	0.961902	0.117299	0.889365	0.0161929	0.970981	0.100567	0.754771	0.174957	0.828308	0.0833666	1.13724	0.184213	1.24324	0.00597746	1.19491	0.166834	1.49055	0.144016	1.22564
PMM0171	PMED4_01771	conserved hypothetical protein	10.441	0.138902	18.2	0.596492	18	1	16.0 Hypothetical	16.1 Conserved hypothetical protein	1.05748	0.0881269	0.665349	0.0767677	0.768204	0.0265319	0.916447	0.083075	1.07584	0.282006	1.39827	0.221852	1.04249	0.010708	1.01304	0.0698116	0.838661	0.242126	0.781802	0.1687	0.99132	0.283997	0.889467	0.0547954	0.836759	0.107975	0.786787	0.0482714	0.87435	0.324088	1.24987	0.0142514	1.41966	0.224477	1.37262	0.0805648	1.26592	0.156883	0.915561
PMM0172	PMED4_01781	ndhH putative NADH dehydrogenase subunit	16.4785	0	18	0.941751	5	0.523697	8.0 Photosynthesis and respiration	8.4 NADH dehydrogenase	0.707925	0.0693044	0.751864	0.0755719	0.91067	0.0797897	1.22139	0.0621209	1.37169	0.492146	1.62103	0.0682158	1.41174	0.0669073	1.23866	0.0762729	1.01197	0.0193505	0.897759	0.0160257	0.800582	0.0310051	0.698273	0.00566193	0.834461	0.000349444	0.808609	0.034356	1.02098	0.0276482	1.49837	0.330188	1.6942	0.0817626	1.75814	0.102307	1.30473	0.0966756	1.2181
PMM0173	PMED4_01791	conserved hypothetical protein	13.3569	0.019424	20	0.757334	7	0.425145	16.0 Hypothetical	16.1 Conserved hypothetical protein	1.11687	0.0402787	0.643555	0.0627203	0.725782	0.0477011	0.876871	0.228152	0.990855	0.335834	1.16331	0.123761	1.24886	0.0160094	1.0476	0.0100756	0.934546	0.0991553	0.83891	0.0263262	0.890536	0.127669	0.715669	0.0631277	0.734673	0.224772	0.695197	0.168897	0.844565	0.0289453	1.13501	0.0621328	1.17708	0.0502087	1.31818	0.222626	1.16789	0.258873	1.12944
PMM0174	PMED4_01801	menE probable O-succinylbenzoic acid--CoA ligase(OSB-CoA synthetase)	10.5521	0.13256	19.2	0.598954	18	1	2.0 Biosynthesis of cofactors, prosthetic groups, and carriers	2.6 Menaquinone and ubiquinone	0.941968	0.0510975	0.975188	0.00626053	0.90326	0.00443736	0.965249	0.045207	1.23612	0.126297	1.07678	0.111411	0.966908	0.0555887	1.04037	0.0919419	1.05002	0.214741	0.96901	0.0563057	1.05753	0.0575139	0.984975	0.0141872	0.97363	0.0607433	0.877448	0.0583296	0.979741	0.228066	1.08232	0.0378644	1.10156	0.158482	1.08533	0.00193884	1.02447	0.0364993	1.25119
PMM0175	PMED4_01811	menC putative O-succinylbenzoate synthase	10.564	0.131801	19.4	0.599506	18	1	2.0 Biosynthesis of cofactors, prosthetic groups, and carriers	2.6 Menaquinone and ubiquinone	0.928053	0.0696499	0.818023	0.0747504	0.950934	0.0586352	0.926059	0.0954256	0.958944	0.134649	1.15413	0.0842236	1.09753	0.149974	1.13316	0.155325	1.03435	0.0363596	0.941781	0.149638	1.06318	0.244033	0.939016	0.0603976	0.961369	0.00466913	0.960478	0.0396677	0.998697	0.00434864	1.27844	0.0729981	1.25306	0.0160895	1.07829	0.128335	1.14456	0.039211	0.979739
PMM0176	PMED4_01821	menA 1,4-dihydroxy-2-naphthoate (DHNA)octaprenyltransferase; UbiA prenyltranferase family	10.6966	0.124034	21.6	0.609896	18	1	2.0 Biosynthesis of cofactors, prosthetic groups, and carriers	2.6 Menaquinone and ubiquinone	1.04501	0.315846	0.7046	0.0813064	0.897452	0.0495048	0.944988	0.11321	0.962655	0.100341	1.15994	0.219698	1.22194	0.0935383	1.18449	0.225766	0.989172	0.00244347	0.840137	0.0170148	1.09816	0.249729	0.919193	0.088308	1.05102	0.137978	0.816325	0.0241408	0.904802	0.12003	1.05268	0.17859	1.09509	0.130922	1.01002	0.107332	1.14234	0.040499	1.03275
PMM0177	PMED4_01831	menF Isochorismate synthase	9.46057	0.208648	5.2	0.544678	18	1	2.0 Biosynthesis of cofactors, prosthetic groups, and carriers	2.6 Menaquinone and ubiquinone	1.38962	0.0953545	0.922646	0.0717403	0.730423	0.0020947	0.768448	0.0602356	0.727456	0.33189	1.02011	0.244299	1.03437	0.0144871	1.02989	0.112451	0.870576	0.0402193	0.968869	0.0641697	1.29044	0.459633	1.26538	0.158602	1.24182	0.247206	0.877801	0.0361181	1.08854	0.0676381	1.05913	0.0642398	1.0353	0.185475	0.927818	0.0718887	0.945356	0.0347898	0.852611
PMM0178	PMED4_01841	gshB putative Glutathione synthetase	15.5424	0.000440529	6.2	0.887488	16	0.612505	10.0 Regulatory functions	10.0 Regulatory functions	1.3608	0.0113566	1.09176	0.191606	0.898604	0.245255	0.918734	0.216948	0.862639	0.0807297	0.809242	0.136482	0.764496	0.229184	0.818034	0.0278759	0.986321	0.069407	1.11777	0.114268	1.26395	0.0475033	1.19736	0.1646	1.26689	0.355301	1.12574	0.210544	0.90739	0.034559	0.958248	0.0976376	0.97154	0.133363	0.829554	0.051453	0.894287	0.0613025	0.867257
PMM0179	PMED4_01851	Glutaredoxin	15.3843	0.000928382	7	0.874461	1	0.706664	15.0 Other categories	15.7 Other	1.51097	0.00502884	1.27943	0.0127229	0.970728	0.0399009	0.953722	0.000945058	0.881827	0.227531	0.823321	0.10726	0.826137	0.016045	0.911432	0.00213672	1.0073	0.0127721	1.1106	0.0940023	1.34979	0.131421	1.37601	0.10623	1.46843	0.415294	1.05717	0.0830675	0.944086	0.0676386	0.966627	0.114173	0.894545	0.142947	0.693005	0.00176017	0.678681	0.0794878	0.747345
PMM0180	PMED4_01861	prfB peptide chain release factor RF-2	6.49823	0.49475	16.2	0.378425	17	1	13.0 Translation	13.5 Protein modification and translation factors	1.13059	0.134656	0.930035	0.0749881	0.819867	0.00233397	0.849384	0.00322416	0.683662	0.644859	1.21728	0.131704	1.1753	0.0109899	1.00524	0.119329	0.876756	0.0934788	0.970215	0.061019	1.00126	0.123237	1.11365	0.322441	1.2865	0.386781	0.992626	0.239898	0.949378	0.0689623	1.38104	0.171967	1.49331	0.154298	1.31494	0.246155	0.981231	0.0713314	0.889725
PMM0181	PMED4_01871	conserved hypothetical protein	13.5209	0.0165627	5.8	0.775157	15	0.595716	16.0 Hypothetical	16.1 Conserved hypothetical protein	1.51566	0.153964	0.993052	0.0675162	0.575645	0.245745	0.687746	0.145844	0.674239	0.260032	0.828141	0.0292732	0.892676	0.233797	0.913944	0.143189	0.862216	0.111188	1.02235	0.0365378	1.57725	0.021485	1.77954	0.401239	1.58988	0.679176	1.01483	0.588512	0.883858	0.179411	1.04867	0.0611693	0.97553	0.0385442	0.834639	0.00461279	0.888124	0.0812062	0.762215
PMM0182	PMED4_01881	conserved hypothetical protein	10.0523	0.163804	17.6	0.577146	18	1	16.0 Hypothetical	16.1 Conserved hypothetical protein	1.31371	0.136332	0.886478	0.108833	0.910828	0.135871	0.986663	0.00289162	1.05521	0.664514	1.11655	0.282523	1.24181	0.0246815	1.25145	0.350009	0.895198	0.0041479	0.865114	0.0199482	0.920025	0.115394	0.984096	0.000247234	0.951624	0.0623014	0.911278	0.147255	0.971571	0.101974	1.28393	0.350534	1.26771	0.321253	1.09173	0.130828	1.09156	0.142336	1.02027
PMM0183	PMED4_01891	dgkA Prokaryotic diacylglycerol kinase	5.96987	0.55291	3.4	0.349659	18	1	7.0 Fatty acid, phospholipid and sterol metabolism	7.0 Fatty acid, phospholipid and sterol metabolism	1.08239	0.166397	0.907863	0.0453498	0.912525	0.012634	0.962937	0.0279184	0.901938	0.0368025	1.01702	0.0250129	1.04599	0.0108027	1.04178	0.175553	0.928576	0.0363909	0.946395	0.0801441	1.14189	0.135083	1.0143	0.228213	1.00357	0.00432774	1.04939	0.0609618	0.957385	0.0929996	1.07961	0.130785	0.966894	0.0769365	0.886124	0.0150638	1.0963	0.0955775	0.895733
PMM0184	PMED4_01901	pabA para-aminobenzoate synthase component II	11.9916	0.0594639	23.2	0.693718	9	0.808934	1.0 Amino acid biosynthesis	1.1 Aromatic amino acid family	1.34879	0.126775	0.657041	0.025171	0.655512	0.0852175	0.807257	0.197356	0.719655	0.326505	1.10694	0.153737	1.13325	0.453429	1.35214	0.0354078	0.995699	0.0802266	0.999795	0.116766	1.02911	0.0117777	1.10354	0.160643	0.957728	0.36046	0.627807	0.113661	0.728919	0.0151389	0.952525	0.0257412	1.02384	0.192277	1.0426	0.143207	1.17999	0.0795981	1.28588
PMM0185	PMED4_01911	conserved hypothetical protein	11.1692	0.095224	22.6	0.642569	9	0.524591	16.0 Hypothetical	16.1 Conserved hypothetical protein	1.01748	0.0254504	0.742691	0.0562594	0.834478	0.160829	0.92606	0.114425	0.920993	0.304189	1.089	0.128351	1.0798	0.243779	1.30694	0.0147753	1.06818	0.0993198	1.0331	0.0939687	1.089	0.118346	0.957886	0.0267955	1.05178	0.0901164	0.761753	0.0981677	0.945638	0.0759812	1.01981	0.0955103	1.01628	0.286276	1.12018	0.185731	1.06511	0.157043	0.945769
PMM0186	PMED4_01921	hisC Aminotransferases class-I	12.6046	0.0361325	22	0.720799	9	0.641747	1.0 Amino acid biosynthesis	1.1 Aromatic amino acid family	0.963894	0.0819098	0.719097	0.212227	0.641091	0.133616	0.671513	0.177514	0.701435	0.331172	1.09805	0.0592724	1.35466	0.148342	1.21243	0.0729353	0.972781	0.0551502	0.88727	0.100566	1.00996	0.163618	1.01366	0.0375516	0.938851	0.00214216	0.746553	0.0362585	0.859571	0.112505	1.03158	0.137432	1.15125	0.0390703	1.11702	0.0600619	1.2697	0.0393212	1.06568
PMM0187	PMED4_01931	argS Arginyl-tRNA synthetase	9.54888	0.201311	3	0.561084	18	1	1.0 Amino acid biosynthesis	1.4 Glutamate family / Nitrogen assimilation	1.17115	0.0969013	0.869977	0.237851	0.791119	0.0568844	0.687498	0.0260256	0.693234	0.267674	0.84661	0.0103978	0.999231	0.178814	0.998412	0.00160946	0.935872	0.0526715	0.977746	0.17752	0.99727	0.0843615	1.06202	0.117269	1.19608	0.231773	1.00074	0.0049162	0.78848	0.0208455	1.09282	0.13702	1.04004	0.207352	0.996424	0.0481228	1.06461	0.125273	1.04526
PMM0188	PMED4_01941	nadC Nicotinate-nucleotidepyrophosphorylase	14.4418	0.00612766	5.6	0.829084	15	0.752232	2.0 Biosynthesis of cofactors, prosthetic groups, and carriers	2.8 Nicotinate and nicotinamide	1.35135	0.274071	1.04795	0.285922	0.662185	0.264951	0.602308	0.0158732	0.448301	0.430968	0.671092	0.06336	0.853919	0.281263	0.949956	0.131127	0.944236	0.0859918	1.09117	0.10342	1.31014	0.00811854	1.5541	0.559446	1.4327	0.437914	1.05805	0.117247	1.10946	0.0205022	1.08016	0.128832	0.796073	0.0285397	0.671331	0.00965073	0.850773	0.0192612	0.875179
PMM0189	PMED4_01951	putative thiophen / furan oxidation protein	14.1205	0.00858704	3.6	0.826346	12	0.780318	10.0 Regulatory functions	10.0 Regulatory functions	1.15773	0.272527	0.760204	0.0175291	0.647121	0.0247187	0.54896	0.00320246	0.633936	0.226867	0.722933	0.224467	0.815685	0.255853	1.03047	0.040629	1.00073	0.00407801	0.966009	0.0363328	1.28105	0.183942	1.43965	0.107844	1.26327	0.116821	1.05407	0.25484	0.937349	0.123314	0.920137	0.0151541	0.82749	0.166779	0.738407	0.00787344	0.950839	0.0857654	1.16053
PMM0190	PMED4_01961	conserved hypothetical protein	7.44027	0.396534	6	0.425365	18	1	16.0 Hypothetical	16.1 Conserved hypothetical protein	1.75374	0.509914	0.924616	0.11612	1.11329	0.255536	0.982203	0.348294	1.14928	0.183694	1.0136	0.333356	1.05807	0.128175	1.12588	0.20671	1.04975	0.278573	0.952088	0.0317191	1.49514	0.532201	1.21344	0.102358	1.43744	0.21239	0.769572	0.103358	0.895696	0.205324	0.919193	0.0727412	0.995675	0.350151	0.726377	0.223181	0.937862	0.132353	0.750022
PMM0191	PMED4_01971	spoT guanosine-3',5'-bis(diphosphate)3'-diphosphatase, (ppGpp)ase	15.0638	0.00175631	21.4	0.857548	8	0.991756	6.0 Energy metabolism	6.5 Sugars	0.813248	0.0206598	0.495616	0.0923083	0.535764	0.0373124	0.737442	0.172576	0.987088	0.278995	1.22145	0.0629401	1.37272	0.241046	1.44592	0.273935	1.07932	0.0666215	1.00858	0.0604886	0.936087	0.141778	0.818449	0.081753	0.719612	0.153529	0.61093	0.0139197	0.740746	0.0552969	1.21249	0.0685539	1.45295	0.197098	1.51026	0.182464	1.51912	0.162405	1.42949
PMM0192	PMED4_01981	ABC transporter, ATP binding component, possiblyfor oligopeptides	15.2974	0.000868486	18.2	0.873083	6	0.705423	14.0 Transport and binding proteins	14.0 Transport and binding proteins	0.958221	0.188253	0.814975	0.0282614	0.941797	0.128401	1.13088	0.086489	1.17648	0.337774	1.53951	0.159635	1.21406	0.202404	1.08257	0.12686	0.920697	0.0908336	0.822521	0.0997973	0.852452	0.288144	0.830908	0.0205285	0.938049	0.0951306	0.894439	0.048469	0.886688	0.190872	1.00548	0.145257	1.37063	0.0222671	1.3217	0.0115103	1.41461	0.21307	1.16064
PMM0193	PMED4_01991	rluD putative pseudouridylate synthase specific toribosomal large subunit	5.40365	0.615974	22	0.308866	18	1	13.0 Translation	13.1 Aminoacyl tRNA synthetases and tRNA modification	1.11692	0.133909	0.820229	0.237364	0.91	0.226875	0.889354	0.0864285	0.95136	0.106517	0.900961	0.154392	1.07886	0.0611715	1.12191	0.040809	0.864003	0.151714	0.90357	0.195263	0.98615	0.215288	0.956132	0.111336	1.18972	0.0478962	0.931157	0.0431093	0.899864	0.0071019	1.06117	0.157944	1.1297	0.0455672	1.00281	0.16099	1.0682	0.103471	1.11149
PMM0194	PMED4_02001	conserved hypothetical protein	8.19697	0.322812	20.6	0.465185	18	1	16.0 Hypothetical	16.1 Conserved hypothetical protein	1.01088	0.0943618	0.613813	0.18456	0.579049	0.255268	0.560972	0.0758937	0.641407	0.609449	1.01007	0.0205269	1.03483	0.0842793	1.22871	0.252416	0.830462	0.0262464	0.788843	0.277492	0.839211	0.379536	0.860173	0.0199547	1.17636	0.071449	0.696898	0.0600231	0.908616	0.0101703	1.26683	0.0909215	1.28481	0.0100414	1.12358	0.152358	1.11516	0.0271151	1.24841
PMM0195	PMED4_02011	pgk, cbbK Phosphoglycerate kinase	17.1245	0	9.4	0.975518	2	0.883562	15.0 Other categories	15.7 Other	4.94009	0.255404	4.86645	0.166309	2.97057	0.191027	1.16746	0.125492	0.841304	0.174139	0.339103	0.0637808	0.275463	0.0279589	0.299773	0.0418036	0.341171	0.00889606	0.583336	0.043869	1.16202	0.0241182	1.94532	0.247727	4.72206	0.149501	4.0559	0.0390568	2.51143	0.168393	1.16011	0.0361465	1.10328	0.122601	0.391892	0.0513286	0.280419	0.00323671	0.245959
PMM0196	PMED4_02021	conserved hypothetical protein	14.866	0.0034965	18.6	0.846896	6	0.938504	16.0 Hypothetical	16.1 Conserved hypothetical protein	0.94006	0.228057	0.782353	0.0432216	0.836226	0.0326138	0.822152	0.109037	1.15545	0.297607	1.45507	0.180436	1.62458	0.390703	1.13876	0.0512959	1.04986	0.0224275	0.875484	0.00742281	0.879988	0.215965	0.859065	0.0369558	0.944109	0.175782	0.730403	0.0398765	0.917726	0.0434112	1.83806	0.0238576	1.85682	0.00691919	1.71033	0.474879	1.73099	0.54818	1.28393
PMM0197	PMED4_02031	murG Undecaprenyl-PP-MurNAc-pentapeptide-UDPGlcNAcGlcNAc transferase	15.1477	0.00148571	18.6	0.862941	6	0.679005	3.0 Cell envelope	3.2 Murein sacculus and peptidoglycan	0.963942	0.0617042	0.886436	0.00931593	0.920081	0.0947967	1.16424	0.148441	1.54817	0.0971843	1.52861	0.226347	1.3341	0.118293	1.23045	0.188843	1.0247	0.203507	0.837127	0.238256	0.894856	0.119647	0.94924	0.0113867	0.933056	0.0635809	0.727682	0.0527717	0.958408	0.112884	1.03959	0.048289	1.46284	0.0655978	1.37883	0.141014	1.53683	0.0469507	1.08756
PMM0198	PMED4_02041	hisC/cobC Aminotransferases class-I	12.4971	0.0401396	22	0.715169	8	0.600364	1.0 Amino acid biosynthesis	1.1 Aromatic amino acid family	0.968884	0.0860532	0.807026	0.0485872	0.780636	0.0959711	1.00426	0.0422754	0.878118	0.0111035	1.10356	0.0935697	1.01592	0.0321858	1.0653	0.0312879	0.978473	0.0392007	0.930331	0.123561	0.977373	0.14876	0.898388	0.087313	0.948305	0.10741	0.859725	0.14398	0.910077	0.0271292	1.05016	0.0850055	1.0383	0.141434	1.0053	0.0874248	1.16109	0.154365	1.20889
PMM0199	PMED4_02051	pyrD Dihydroorotate dehydrogenase	13.8514	0.011782	0	0.808107	10	0.950815	9.0 Purines, pyrimidines, nucleosides, and nucleotides	9.3 Pyrimidine ribonucleotide biosynthesis	0.875011	0.00133108	0.752022	0.138796	0.764005	0.0271339	0.744592	0.18673	0.738111	0.169441	0.89684	0.0977661	1.08756	0.143751	1.24124	0.0139973	1.12875	0.0218198	1.10262	0.0580233	1.14428	0.18598	1.12313	0.153951	0.914248	0.0837743	0.80325	0.0198675	0.860224	0.190571	1.00629	0.0149437	0.978776	0.048892	0.918299	0.0782156	1.2159	0.207598	1.33791
PMM0200	PMED4_02061	rnhA possible ribonuclease HI	14.9492	0.00283613	2.6	0.879661	13	0.970095	12.0 Transcription	12.1 Degradation of RNA	1.00621	0.315162	1.13338	0.172384	0.711716	0.130604	0.36967	0.104548	0.307794	0.0168944	0.474369	0.0679116	1.11487	0.235006	1.7094	0.0535947	1.6051	0.205263	1.51476	0.0590464	1.61482	0.0564947	1.48832	0.304465	0.994127	0.115095	0.843129	0.226244	0.505316	0.0241182	0.39614	0.0253469	0.308902	0.0023365	0.389681	0.068156	0.907631	0.28472	1.42427
PMM0201	PMED4_02071	rpl12, rplL, rpl7 50S ribosomal protein L7/L12	14.3544	0.00683333	2.6	0.84493	13	0.977899	13.0 Translation	13.2 Ribosomal proteins	1.0094	0.150484	0.992709	0.0101776	0.846167	0.146362	0.57092	0.140172	0.35337	0.0353698	0.444207	0.0173866	1.19774	0.0680501	1.59325	0.0949875	1.58786	0.0816727	1.36587	0.003898	1.19922	0.0313573	1.14556	0.0173314	0.929499	0.0334372	0.93208	0.0106363	0.761662	0.018706	0.46788	0.0389596	0.332101	0.0296274	0.41523	0.0226486	0.974934	0.0351055	1.62638
PMM0202	PMED4_02081	rpl10, rplJ 50S ribosomal protein L10	14.018	0.00960366	2.4	0.825459	13	0.959147	13.0 Translation	13.2 Ribosomal proteins	1.02817	0.0338736	1.02509	0.0168259	0.786308	0.0949817	0.553275	0.0535115	0.319562	0.0164587	0.482947	0.00624185	1.26344	0.0269458	1.6069	0.0156088	1.47849	0.0515175	1.28587	0.0735657	1.12891	0.046781	1.0727	0.0117371	0.846146	0.0689838	0.85356	0.0599694	0.726561	0.0416486	0.438748	0.0392668	0.319486	0.0214261	0.446047	0.00413356	0.963641	0.0208744	1.40975
PMM0203	PMED4_02091	rpl1, rplA 50S ribosomal protein L1	14.6198	0.00468468	2.6	0.86048	13	0.978677	13.0 Translation	13.2 Ribosomal proteins	1.04345	0.0632428	0.9713	0.0503877	0.75519	0.0472603	0.532231	0.0308684	0.424331	0.0040152	0.46114	0.0261089	1.02714	0.0384898	1.43912	0.0507241	1.3509	0.0807951	1.17451	0.150588	1.06967	0.0454761	1.04149	0.00940443	0.903559	0.0293252	0.8432	0.0877326	0.662229	0.0236997	0.485878	0.0275427	0.396979	0.0413353	0.465352	0.0196027	0.914077	0.0684172	1.45349
PMM0204	PMED4_02101	rpl11, rplK 50S ribosomal protein L11	15.7837	0.000359066	3.4	0.924958	13	0.998035	13.0 Translation	13.2 Ribosomal proteins	1.14135	0.0347647	1.00533	0.067465	0.80016	0.00414866	0.648082	0.0194687	0.49353	0.0861397	0.661065	0.0428625	0.928376	0.0604282	1.12931	0.0173858	1.23176	0.0759772	1.26711	0.0546246	1.17865	0.00519816	1.17933	0.121333	1.02834	0.116592	0.935568	0.0458181	0.740364	0.0438904	0.598887	0.0222867	0.54961	0.0669133	0.56493	0.0143319	0.807338	0.118035	1.04776
PMM0205	PMED4_02111	nusG transcription antitermination protein, NusG	16.0572	0.000472813	2.6	0.94456	13	0.882085	12.0 Transcription	12.2 RNA synthesis, modification, and DNA transcription	1.10714	0.0705151	0.968226	0.0434922	0.865571	0.0364015	0.76509	0.00132444	0.647359	0.109549	0.783242	0.120463	0.934506	0.0976244	1.10284	0.0220421	1.18462	0.15556	1.18416	0.00423071	1.23519	0.11615	1.07843	0.050538	0.925539	0.170901	0.775925	0.129504	0.784542	0.0698181	0.764456	0.0664423	0.727882	0.17405	0.707521	0.0269172	0.886596	0.09106	1.05053
PMM0206	PMED4_02121	secE putative preprotein translocase, SecE subunit	15.7576	0.000351494	2.8	0.926914	12	0.47764	4.0 Cellular processes	4.6 Protein and peptide secretion	1.01043	0.0763708	0.917648	0.178912	0.621887	0.154941	0.649742	0.240944	0.511306	0.032687	0.851207	0.0291847	0.979831	0.167768	1.11483	0.234997	1.28461	0.197502	1.3482	0.151755	1.4682	0.0234426	1.33433	0.154557	1.07639	0.327238	0.807416	0.260744	0.726993	0.141073	0.746654	0.029522	0.636139	0.139051	0.611952	0.0766846	0.759795	0.0798751	1.08496
PMM0207	PMED4_02131	clpB2 putative ATP-dependent Clp protease, Hsp 100,ATP-binding subunit ClpB	14.7702	0.00402685	20.6	0.838235	8	0.859559	13.0 Translation	13.3 Degradation of proteins, peptides, and glycopeptides	0.84668	0.0829362	0.692389	0.04205	0.780056	0.0638323	0.835865	0.00734789	0.853707	0.273454	1.10277	0.00931532	1.21387	0.208538	1.10547	0.0381033	1.06803	0.0926809	0.974326	0.0704708	0.912347	0.121565	0.855308	0.188784	0.805503	0.0955652	0.641988	0.0582249	0.834219	0.03985	1.27337	0.0748351	1.35142	0.156839	1.38118	0.00490849	1.28645	0.214901	1.43107
PMM0208	PMED4_02141	eno Enolase	17.1204	0	19.2	0.972197	6	0.535857	15.0 Other categories	15.7 Other	0.380021	0.025003	0.422331	0.0603878	0.884674	0.0250611	1.61764	0.148702	1.76785	0.334864	2.47794	0.220513	2.26054	0.0218041	1.77019	0.0686405	1.18518	0.0792992	0.951677	0.00718071	0.671558	0.0100535	0.414032	0.00633844	0.27403	0.0546246	0.340132	0.0218061	0.736202	0.0424714	1.43078	0.205426	1.9676	0.291728	2.29315	0.0669972	2.16589	0.0832692	1.68163
PMM0209	PMED4_02151	possible kinase	11.8897	0.0632653	1.8	0.700413	12	0.501401	15.0 Other categories	15.7 Other	1.01935	0.112528	0.843304	0.206095	0.74035	0.0291482	0.707199	0.0838898	0.782091	0.105499	0.826414	0.0344774	0.92575	0.143776	1.06253	0.0239956	1.01475	0.0846658	1.03369	0.0150903	1.10367	0.1123	1.04619	0.15746	1.11367	0.161392	0.933326	0.0395641	0.892293	0.0283998	0.985501	0.0134243	1.09279	0.0339871	0.957772	0.058655	0.985598	0.132951	1.04115
PMM0210	PMED4_02161	possible (AF128446) repeat motif protein bdrA3[Borreli...	10.4873	0.135665	0.2	0.612838	17	1	7.0 Fatty acid, phospholipid and sterol metabolism	7.0 Fatty acid, phospholipid and sterol metabolism	0.78407	0.202457	0.714834	0.109698	0.564643	0.0681422	0.586821	0.155759	0.668571	0.176358	0.926517	0.0607875	0.851936	0.203416	1.24771	0.0828383	1.035	0.027218	1.04518	0.227073	1.09649	0.0414545	1.05002	0.0117237	0.945433	0.182051	0.882851	0.0865043	0.884927	0.276565	1.15669	0.197653	1.06648	0.275691	1.00898	0.0854299	1.08795	0.169307	1.14542
PMM0211	PMED4_02171	trxB FAD-dependent pyridine nucleotide-disulphideoxidoreductase	16.6363	0	15.6	0.97244	4	0.989604	15.0 Other categories	15.7 Other	0.880756	0.0157044	1.01991	0.0302468	1.41288	0.198625	2.65582	0.11225	2.30687	0.728135	2.06462	0.236211	1.55237	0.0244205	0.96204	0.114527	0.701636	0.00851834	0.596985	0.00624353	0.619346	0.00918203	0.703236	0.0849335	0.91601	0.115718	0.870347	0.156514	1.49835	0.268145	2.51411	0.245619	2.65625	0.0507881	2.04038	0.354294	1.37977	0.007493	0.960096
PMM0212	PMED4_02181	conserved hypothetical protein	5.97109	0.552927	0.8	0.350513	17	1	16.0 Hypothetical	16.1 Conserved hypothetical protein	1.48716	0.200062	1.01069	0.168693	0.930894	0.194839	0.80225	0.32359	1.07444	0.1652	1.2763	0.0351319	1.29984	0.178678	1.02422	0.173145	0.952094	0.0240609	0.97151	0.0764556	1.1227	0.0799597	1.15119	0.02681	1.06987	0.048342	0.919296	0.0116916	0.659969	0.0468071	0.775823	0.0690232	0.920832	0.414199	1.10076	0.18143	1.26268	0.0997152	0.921221
PMM0213	PMED4_02191	sbtA putative sodium-dependent bicarbonatetransporter	16.043	0.0004662	5.8	0.919697	16	0.998332	14.0 Transport and binding proteins	14.0 Transport and binding proteins	1.82185	0.160331	1.38145	0.0394829	1.22439	0.501796	0.789055	0.261987	0.541775	0.211709	0.397222	0.0520821	0.706947	0.0235474	0.761008	0.0465782	0.969915	0.0531664	1.14338	0.175759	1.31694	0.0627047	1.38602	0.211905	1.35434	0.146877	1.22101	0.216483	0.937941	0.103567	0.62459	0.112437	0.350172	0.0195039	0.361185	0.0211678	0.586638	0.0419873	0.775127
PMM0214	PMED4_02201	putative sulfate transporter	16.1312	0.000510204	6	0.921895	16	0.99356	10.0 Regulatory functions	10.0 Regulatory functions	1.62549	0.0564357	1.48473	0.107913	1.24041	0.301012	0.839429	0.291226	0.460705	0.102196	0.345835	0.00529017	0.626329	0.0332487	0.784389	0.0196639	0.867883	0.0619723	1.08582	0.161576	1.25444	0.0480573	1.33271	0.0992535	1.25339	0.122229	1.18922	0.049995	0.979116	0.0611407	0.611813	0.0210881	0.366369	0.015177	0.361207	0.0130655	0.527607	0.111763	0.66291
PMM0215	PMED4_02211	Delta-aminolevulinic acid dehydratase	16.9839	0	5.8	0.973649	16	0.999851	7.0 Fatty acid, phospholipid and sterol metabolism	7.0 Fatty acid, phospholipid and sterol metabolism	1.78814	0.166321	1.55632	0.257026	0.988908	0.0417764	0.534749	0.0465993	0.347832	0.0981303	0.391034	0.00892521	0.509069	0.0798912	0.725145	0.0951835	1.0135	0.10462	1.31362	0.152552	1.51655	0.0495607	1.70719	0.265484	1.65904	0.240157	1.2434	0.0675513	0.840836	0.0294384	0.603249	0.0433981	0.387927	0.0354151	0.338611	0.0148131	0.514544	0.0947234	0.659372
PMM0216	PMED4_02221	Glyoxalase/Bleomycin resistanceprotein/Dioxygenase superfamily	15.799	0.000364964	7.2	0.896626	1	0.932873	15.0 Other categories	15.1 Adaptations and atypical conditions	1.92218	0.0148251	1.34476	0.0550573	1.13506	0.0809078	0.996783	0.0458861	0.809753	0.173608	0.768219	0.0344638	0.73596	0.071483	0.930651	0.0630735	0.956331	0.0373266	1.06704	0.0501851	1.25339	0.131258	1.39936	0.167	1.47674	0.141431	1.13443	0.0408069	1.08072	0.108116	0.91344	0.0481746	0.855357	0.0674468	0.621132	0.0959665	0.718138	0.0164327	0.817514
PMM0217	PMED4_02231	mutS putative DNA mismatch repair protein MutS family	9.36205	0.216077	2.4	0.551423	18	1	11.0 DNA replication, recombination, and repair	11.0 DNA replication, recombination, and repair	1.27994	0.210361	0.782859	0.0543605	0.88833	0.199085	0.749768	0.0806571	0.86165	0.230466	0.833071	0.0247348	0.981313	0.0456369	1.14397	0.159114	1.03656	0.328458	1.10107	0.23385	1.04662	0.310421	0.968976	0.0442233	1.14234	0.0487828	0.935442	0.122329	0.970445	0.171299	0.963513	0.117088	1.06242	0.235971	0.901382	0.0447613	1.09554	0.143126	1.02618
PMM0218	PMED4_02241	GTP1/OBG family	16.7397	0	18.2	0.955442	6	0.719871	15.0 Other categories	15.7 Other	0.752942	0.116739	0.712176	0.0166109	1.10466	0.0886499	1.37796	0.0438001	1.44567	0.344909	1.88442	0.00305042	1.83215	0.157094	1.39294	0.189918	0.933751	0.0107842	0.864633	0.091596	0.805338	0.0725788	0.766943	0.0609508	0.77173	0.0126025	0.69824	0.0827434	0.941087	0.0352051	1.54231	0.00105509	1.71621	0.34728	1.98739	0.169247	1.96938	0.397192	1.21195
PMM0220	NA	unnamed product	16.2383	0.000282486	20.2	0.92073	7	0.560415			0.27131	0.00366778	0.159713	0.0817375	0.373063	0.015326	0.770176	0.141092	1.16096	0.405118	2.45099	1.08015	2.08919	0.999496	2.32392	0.739047	1.8181	0.0622314	1.1884	0.252331	0.711489	0.0174095	0.432902	0.0172111	0.300871	0.108108	0.295178	0.0296065	0.929207	0.0640868	2.3251	0.181069	2.95718	0.0901457	3.01595	0.493263	2.83015	0.157887	2.70952
PMM0221	PMED4_02261	Glutathione S-transferase C terminus	8.58831	0.285174	2	0.506071	18	1	15.0 Other categories	15.7 Other	1.24512	0.0120206	0.875546	0.00691316	0.917316	0.0568447	0.938335	0.0701851	0.80062	0.325002	0.735814	0.0648671	0.945889	0.0298745	1.09472	0.00949142	1.12913	0.0743153	1.20544	0.0669301	1.19333	0.38144	0.950582	0.113156	1.04621	0.124276	0.84768	0.176193	0.890086	0.0605409	1.17535	0.113598	1.08078	0.228829	0.910769	0.026196	1.04725	0.0610186	1.03112
PMM0222	PMED4_02271	putative aspartoacylase	12.1832	0.0527355	2.2	0.71766	12	0.616721	10.0 Regulatory functions	10.0 Regulatory functions	1.01823	0.278593	0.675682	0.122677	0.573314	0.0728303	0.614203	0.169217	0.619254	0.134976	0.908394	0.17031	0.903201	0.140312	1.07146	0.095773	0.909148	0.331337	1.05609	0.0533299	1.29704	0.00258856	1.25603	0.408508	1.08213	0.528772	0.769393	0.290821	0.831357	0.0603428	0.936604	0.0945496	0.858004	0.147287	0.893115	0.265682	1.04916	0.108126	0.996496
PMM0223	PMED4_02281	psbA Photosystem II PsbA protein (D1)	16.5083	0	12.2	0.963398	3	0.997541	8.0 Photosynthesis and respiration	8.6 Photosystem II	1.53851	0.00964045	1.69629	0.0791995	1.81252	0.209839	1.66518	0.21281	1.54231	0.166125	1.04085	0.0334983	0.868189	0.0434791	0.689156	0.0362816	0.618206	0.00922995	0.751823	0.121635	0.809502	0.0450903	0.835781	0.00636149	1.60741	0.0127845	1.75589	0.0378309	1.85419	0.000946532	1.69593	0.0450758	1.5279	0.0255449	1.17748	0.0254826	0.752858	0.0416171	0.739506
PMM0224	PMED4_02291	aroC Chorismate synthase	16.9172	0	20.4	0.959144	7	0.895541	1.0 Amino acid biosynthesis	1.1 Aromatic amino acid family	0.468634	0.00427099	0.396224	0.00273743	0.681207	0.0988166	1.03096	0.0235712	1.16786	0.284377	1.50768	0.0337751	1.62065	0.0637399	1.69754	0.153641	1.33929	0.186841	0.962553	0.178327	0.782265	0.100999	0.589994	0.0116852	0.523479	0.0211369	0.425359	0.00745083	0.637202	0.0832782	1.11789	0.204834	1.51839	0.307424	1.56951	0.112337	1.61515	0.0510917	1.64919
PMM0225	PMED4_02301	possible 2-keto-3-deoxy-6-phosphogluconatealdolase	11.3993	0.082635	6.6	0.649433	15	0.330263	6.0 Energy metabolism	6.3 Pentose phosphate pathway	2.62957	1.32105	1.12428	0.204839	1.11022	0.157147	0.803081	0.316549	0.774631	0.182469	0.937293	0.00893426	0.863854	0.030753	0.882827	0.0132518	0.97869	0.285521	0.990388	0.0887138	1.25722	0.158032	1.14348	0.230894	1.46251	0.273527	1.08521	0.133661	1.00076	0.0545245	0.973638	0.0743265	0.984123	0.262103	0.828094	0.0303935	0.867532	0.130687	0.972749
PMM0226	PMED4_02311	ftsH2 cell division protein FtsH2	15.1296	0.00147225	8.8	0.8592	2	0.697741	4.0 Cellular processes	4.1 Cell division	1.49668	0.00490868	1.45729	0.0619771	1.29013	0.151437	1.03614	0.215721	1.01074	0.0439323	0.715028	0.0561279	0.80714	0.0379487	0.876743	0.0395052	0.891928	0.0259846	0.958194	0.0485068	0.990293	0.0233046	1.03226	0.00149799	1.39441	0.101778	1.32287	0.0301343	1.24743	0.064492	1.05581	0.000383033	1.10552	0.0665275	0.733148	0.0062211	0.745375	0.0424351	0.895341
PMM0227	PMED4_02321	cysD ATP-sulfurylase	16.4452	0	7.4	0.933301	1	0.980915	1.0 Amino acid biosynthesis	1.5 Serine family / Sulfur assimilation	2.08567	0.00829694	1.99925	0.195245	1.72671	0.408319	1.09249	0.418328	0.628579	0.0496596	0.486995	0.0433456	0.499149	0.0509082	0.558992	0.00518797	0.931972	0.138193	1.03867	0.149537	1.30878	0.0816901	1.42012	0.134876	1.39553	0.0458211	1.28043	0.0795083	0.999909	0.0190787	0.7497	0.138861	0.577547	0.0441702	0.438367	0.00459456	0.522562	0.0358505	0.556104
PMM0228	PMED4_02331	psbO Photosystem II manganese-stabilizing protein	16.5268	0	7.6	0.937382	1	0.998499	8.0 Photosynthesis and respiration	8.6 Photosystem II	1.7052	0.0073526	1.48961	0.0839713	1.29018	0.0192139	1.03492	0.0852456	0.686762	0.113399	0.506326	0.140109	0.619096	0.0354972	0.709475	0.0384561	0.795389	0.0766377	1.03545	0.0634123	1.16489	0.0743399	1.31067	0.0651587	1.30226	0.125329	1.20028	0.113895	1.18327	0.0896673	0.877262	0.0672893	0.600597	0.0230505	0.44935	0.0344163	0.56637	0.0516034	0.622275
PMM0229	PMED4_02341	dfp (coaBC) putative p-pantothenate cysteine ligase andp-pantothenenoylcysteine decarboxylase	8.98238	0.249027	9.6	0.511893	17	1	10.0 Regulatory functions	10.0 Regulatory functions	1.29004	0.00280869	0.981354	0.0826776	1.0071	0.0286507	1.14089	0.124082	0.930942	0.156716	0.913018	0.151539	0.931879	0.0514367	0.845459	0.0490555	0.890294	0.09783	1.02484	0.0616148	1.11588	0.051357	1.05706	0.202453	1.03358	0.192034	0.96459	0.101948	0.98244	0.182392	1.11125	0.0609327	1.13228	0.219556	0.93096	0.0837896	0.910499	0.131664	0.908022
PMM0231	PMED4_02361	conserved hypothetical protein	3.15858	0.840739	3.8	0.184569	17	1	16.0 Hypothetical	16.1 Conserved hypothetical protein	0.931742	0.236224	0.975686	0.201982	0.664924	0.187618	0.726796	0.125148	0.632499	0.227203	0.976572	0.0951104	0.961976	0.324582	1.15484	0.21172	0.951177	0.0275107	0.941985	0.0770092	1.01627	0.0110628	1.03296	0.044393	1.14135	0.446128	1.14533	0.0936645	1.22828	0.113379	1.24073	0.122652	0.911389	0.21467	0.853533	0.113326	0.988772	0.0235179	1.10703
PMM0232	PMED4_02371	conserved hypothetical protein	10.3671	0.142902	20	0.587762	17	1	16.0 Hypothetical	16.1 Conserved hypothetical protein	1.40556	0.105576	0.897884	0.0634484	0.970445	0.0697587	0.991285	0.0117873	0.962624	0.173122	1.31527	0.311244	1.26985	0.0310539	1.30047	0.0501018	1.02585	0.0365409	0.892768	0.194541	1.02374	0.0117448	0.875377	0.10933	0.946558	0.311584	0.795695	0.159118	1.01246	0.129232	0.998264	0.0363324	0.969722	0.238624	0.971006	0.0720641	1.14934	0.12458	1.12334
PMM0233	PMED4_02381	pyrB aspartate carbamoyltransferase	15.293	0.00086741	20.8	0.868513	8	0.730039	9.0 Purines, pyrimidines, nucleosides, and nucleotides	9.3 Pyrimidine ribonucleotide biosynthesis	0.884875	0.0463422	0.448666	0.120486	0.634577	0.0863545	0.803036	0.136718	1.07004	0.116166	1.44739	0.0877687	1.56489	0.406319	1.39845	0.0559777	1.08798	0.0928671	1.05676	0.115943	0.97014	0.155662	0.821504	0.00288926	0.772046	0.055843	0.577258	0.0531629	0.743711	0.0562217	1.07759	0.10074	1.51888	0.330996	1.43008	0.321824	1.56716	0.081351	1.31008
PMM0234	PMED4_02391	possible Methylpurine-DNA glycosylase (MPG)	13.5079	0.0166551	20.6	0.766252	8	0.776818	11.0 DNA replication, recombination, and repair	11.0 DNA replication, recombination, and repair	0.904882	0.18829	0.51027	0.0460836	0.606651	0.120386	0.683903	0.0605933	0.918993	0.298491	1.4016	0.0809718	1.39666	0.154968	1.21853	0.0803554	0.95097	0.0526235	1.01499	0.106474	1.01315	0.0401722	0.963382	0.0255499	0.880934	0.223008	0.784207	0.0257921	0.783696	0.096104	1.37023	0.385456	1.36222	0.242418	1.44952	0.137098	1.2714	0.129795	1.21344
PMM0235	PMED4_02401	gatC Glutamyl-tRNA(Gln) amidotransferase subunit C	15.7066	0.000330579	16.6	0.910595	4	0.892105	13.0 Translation	13.1 Aminoacyl tRNA synthetases and tRNA modification	0.908207	0.573696	0.901972	0.301528	0.759886	0.231062	0.870972	0.442947	0.736344	0.710692	1.43698	0.150944	1.17323	0.274777	1.1553	0.12469	0.832499	0.0789963	0.736963	0.122948	0.85622	0.0149498	0.890106	0.110234	0.951211	0.410081	0.988318	0.292901	1.13721	0.0786558	1.5693	0.168687	1.65511	0.529053	1.32059	0.257832	1.31194	0.094324	1.14627
PMM0236	NA	unnamed product	13.6818	0.0145324	18.4	0.780521	6	0.632339			1.02176	0.124224	0.745163	0.0384051	0.840614	0.0239376	1.03245	0.221586	1.23653	0.110563	1.32622	0.0028874	1.56711	0.235774	1.17532	0.0722822	0.982314	0.052963	0.809387	0.0344003	0.858699	0.101146	0.798699	0.126654	1.08289	0.225994	0.880408	0.0254889	0.993947	0.049226	1.21681	0.0034047	1.51194	0.346533	1.3131	0.0756019	1.47073	0.112769	1.15656
PMM0237	PMED4_02421	conserved hypothetical protein	15.2191	0.000948992	22.2	0.872023	9	0.942725	16.0 Hypothetical	16.1 Conserved hypothetical protein	0.889858	0.0698519	0.68394	0.0177381	0.597793	0.0060738	0.668964	0.0513732	0.839332	0.192501	1.31794	0.162817	1.49049	0.10666	1.47205	0.0635314	1.39259	0.135539	1.11175	0.0154622	1.00795	0.155347	0.940336	0.0900089	0.945696	0.0338245	0.825694	0.110662	0.813168	0.0630057	1.01178	0.0353126	1.13659	0.227173	1.34399	0.115049	1.47732	0.459363	1.35673
PMM0238	PMED4_02431	ileS Isoleucyl-tRNA synthetase	14.678	0.00454545	1	0.862142	11	0.84507	13.0 Translation	13.1 Aminoacyl tRNA synthetases and tRNA modification	1.1496	0.0713754	0.892313	0.11913	0.723505	0.0436045	0.59798	0.0106455	0.554132	0.159254	0.920505	0.0171004	1.12647	0.193768	1.25926	0.0712334	1.18626	0.0659753	1.09095	0.0148533	1.11983	0.0355249	1.02631	0.10279	0.944443	0.12786	0.845064	0.0993139	0.790755	0.0144914	0.765814	0.0445149	0.794317	0.0162476	1.01368	0.0171122	1.17755	0.219761	1.31051
PMM0239	PMED4_02441	conserved hypothetical protein	15.694	0.000323102	8.6	0.890671	2	0.675555	16.0 Hypothetical	16.1 Conserved hypothetical protein	1.27651	0.0753158	1.33263	0.0769125	1.00598	0.111959	0.911103	0.244189	0.74212	0.191885	0.820904	0.109318	0.600269	0.0186696	0.520741	0.0734583	0.594163	0.032264	0.861779	0.0278136	1.11041	0.0306588	1.20552	0.01908	1.10727	0.123014	1.20778	0.196336	1.04277	0.0613806	1.06682	0.0269231	0.873819	0.0211493	0.743263	0.0397781	0.666739	0.070674	0.535912
PMM0240	PMED4_02451	conserved hypothetical protein	10.1576	0.156997	4	0.591842	18	1	16.0 Hypothetical	16.1 Conserved hypothetical protein	1.10221	0.35131	0.858887	0.0598623	0.796229	0.0191158	0.702993	0.0613766	0.997058	0.200238	0.780267	0.159708	0.91081	0.111563	0.92217	0.00998736	0.887318	0.0475868	1.00163	0.0127493	1.21126	0.250645	1.07892	0.0333155	1.10317	0.171361	0.981748	0.0417808	1.08366	0.11258	1.22743	0.0599228	1.02467	0.0207092	0.882114	0.0185668	0.980935	0.0977694	1.10117
PMM0241	PMED4_02461	Phosphotransferase superclass	15.6849	0.000321543	21	0.891265	8	0.778496	15.0 Other categories	15.7 Other	0.899063	0.0723648	0.717887	0.0722177	0.754287	0.136323	0.811175	0.0561961	0.905009	0.24935	1.13818	0.0647346	1.43909	0.309451	1.37205	0.0534065	1.0583	0.0836382	0.972055	0.163	0.875683	0.150085	0.791298	0.0188207	0.808586	0.147986	0.662763	0.0083435	0.889005	0.10671	1.13059	0.0706622	1.18504	0.0869113	1.31375	0.0889151	1.45373	0.0702392	1.54219
PMM0242	PMED4_02471	txlA thioredoxin-like protein TxlA	15.0904	0.00155729	7.8	0.855565	2	0.499854	2.0 Biosynthesis of cofactors, prosthetic groups, and carriers	2.11 Thiamine	1.41381	0.0769594	1.20291	0.234503	1.00811	0.153481	0.679688	0.205252	0.779077	0.326652	0.918204	0.0913752	0.709617	0.151628	0.80929	0.0942257	0.890035	0.140043	1.02644	0.141133	1.20113	0.104758	1.40228	0.267246	1.67643	0.453338	1.24936	0.248367	1.16029	0.111013	0.964381	0.0351397	0.970692	0.106528	0.7148	0.0163673	0.804136	0.06698	0.834258
PMM0243	PMED4_02481	possible Thy1 protein homolog	17.0444	0	19.2	0.967945	6	0.820726	9.0 Purines, pyrimidines, nucleosides, and nucleotides	9.3 Pyrimidine ribonucleotide biosynthesis	0.407381	0.0606893	0.363474	0.0313871	0.809196	0.0428539	1.39954	0.16353	1.53114	0.27736	2.48338	0.0191317	1.91024	0.661767	1.81456	0.0885859	1.23281	0.0314914	0.800918	0.0435132	0.697127	0.0724045	0.488321	0.0325302	0.407823	0.0598414	0.37151	0.107907	0.895013	0.053534	1.62758	0.0616246	2.11915	0.258854	2.26494	0.0801244	2.07593	0.121322	1.77328
PMM0244	PMED4_02491	dcd dCTP Deaminase	17.0731	0	19.2	0.969615	6	0.791329	9.0 Purines, pyrimidines, nucleosides, and nucleotides	9.2 Purine ribonucleotide biosynthesis	0.24437	0.0213058	0.247964	0.0552101	0.712046	0.0665038	1.43324	0.033161	1.58663	0.56805	2.87342	0.030273	2.36697	0.434263	1.9622	0.0183725	1.12091	0.0443609	0.716473	0.150962	0.492239	0.0630474	0.368149	0.0138168	0.238132	0.0235638	0.290765	0.0295058	0.83781	0.103244	1.83172	0.199983	2.44731	0.390577	2.70221	0.0861334	2.55099	0.214939	2.11709
PMM0245	PMED4_02501	cob(I)alamin adenosyltransferase	16.7384	0	19.4	0.949919	6	0.754448	2.0 Biosynthesis of cofactors, prosthetic groups, and carriers	2.3 Cobalamin, heme, phycobilin and porphyrin	0.224373	0.0333313	0.187569	0.06623	0.508912	0.0676143	1.15506	0.162644	1.25723	0.765063	2.38141	0.497326	2.21017	0.857119	1.89877	0.279853	1.26101	0.0331381	0.725976	0.0894345	0.486466	0.0597288	0.346994	0.00806001	0.233564	0.0303625	0.287898	0.00266547	0.90615	0.195122	2.05037	0.100679	2.77437	0.639377	2.74922	0.0304129	2.45318	0.198431	2.20768
PMM0246	PMED4_02511	ntcA Global nitrogen regulatory protein, CRP family oftranscriptional regulators	5.11912	0.647402	7.8	0.290219	18	1	14.0 Transport and binding proteins	14.0 Transport and binding proteins	1.83802	0.983308	1.21978	0.129056	0.991627	0.196867	0.912417	0.191383	0.74843	0.49355	0.808203	0.101665	1.06713	0.015311	1.19637	0.179247	1.07103	0.149508	1.20191	0.298187	1.05382	0.0792364	0.80924	0.160332	1.20414	0.0910792	0.996296	0.0919081	1.14693	0.0485544	0.990277	0.251093	0.831749	0.0605342	0.792361	0.0341199	0.918053	0.109497	0.924635
PMM0247	PMED4_02521	conserved hypothetical protein	11.8592	0.0645265	22.6	0.681828	9	0.738484	16.0 Hypothetical	16.1 Conserved hypothetical protein	0.99269	0.0291548	0.74659	0.00418884	0.591429	0.140888	0.672319	0.00728135	0.996085	0.132675	1.03388	0.0252833	1.16909	0.167567	1.32216	0.150351	0.94811	0.0164085	0.968116	0.0276221	0.971217	0.15241	0.988174	0.19871	0.906033	0.0121395	0.761562	0.0187728	0.785452	0.00166619	1.14157	0.000382279	1.04773	0.191724	0.952273	0.0822856	1.12067	0.0943832	1.2427
PMM0248	PMED4_02531	conserved hypothetical protein	9.35029	0.217277	1.2	0.550021	18	1	16.0 Hypothetical	16.1 Conserved hypothetical protein	1.04619	0.0982157	0.671424	0.332424	0.801497	0.214271	0.612667	0.0816048	0.687109	0.287043	0.804222	0.0980763	0.976263	0.175826	1.02883	0.0549454	1.04456	0.0990309	0.970384	0.195132	1.0554	0.234847	0.99372	0.037986	1.00932	0.0523792	0.893611	0.0101021	1.14447	0.13421	0.998695	0.135481	1.11049	0.00564113	1.01535	0.163205	1.06852	0.178201	1.1974
PMM0249	PMED4_02541	conserved hypothetical protein	10.5079	0.134612	23.2	0.608117	18	1	16.0 Hypothetical	16.1 Conserved hypothetical protein	1.25005	0.041742	0.640084	0.0644988	0.884523	0.113164	0.696463	0.166862	0.958375	0.321455	0.954618	0.0918453	1.10189	0.0110724	1.25643	0.207536	1.1507	0.136596	1.11018	0.239206	1.09434	0.236427	0.951177	0.00584092	0.993172	0.0425723	0.795949	0.0846391	1.02102	0.00245067	0.949714	0.093376	1.0177	0.127558	0.947766	0.292944	1.02781	0.106142	0.990646
PMM0250	PMED4_02551	pth Peptidyl-tRNA hydrolase	10.1678	0.156247	5.2	0.586137	18	1	13.0 Translation	13.1 Aminoacyl tRNA synthetases and tRNA modification	2.3467	1.54898	0.907245	0.235378	1.03041	0.0745887	0.950391	0.139589	0.606031	0.21444	0.819948	0.0666178	0.830731	0.0618572	1.01363	0.00809194	0.986668	0.245248	1.03657	0.0472431	1.2356	0.0109329	1.05174	0.0761917	1.08085	0.253956	0.829879	0.429686	0.990141	0.180053	0.888602	0.0254035	0.960688	0.0554996	0.699826	0.107833	0.848881	0.0954317	0.997083
PMM0251	PMED4_02561	psbH Photosystem II PsbH protein	16.8356	0	7.8	0.954692	1	0.998231	8.0 Photosynthesis and respiration	8.6 Photosystem II	1.55446	0.279397	1.45856	0.190133	0.811815	0.487031	0.749042	0.269062	0.436205	0.438486	0.650224	0.00238092	0.553516	0.154038	0.70081	0.0955521	0.725939	0.213532	1.02022	0.0972077	1.39398	0.226775	1.52248	0.134725	1.40113	0.403161	1.31266	0.241492	1.34039	0.135703	1.0162	0.0818308	0.735582	0.0933583	0.512757	0.0127112	0.576625	0.0841731	0.565101
PMM0252	PMED4_02571	psbN Photosystem II reaction centre N protein (psbN)	15.8798	0.000389105	12.6	0.930615	3	0.997594	8.0 Photosynthesis and respiration	8.6 Photosystem II	1.2106	0.00287282	1.37764	0.0126134	1.30027	0.144107	1.22618	0.0716948	1.43877	0.250864	1.19587	0.0834497	0.883565	0.154664	0.64665	0.0364165	0.506458	0.0393443	0.545355	0.0637838	0.726747	0.0434591	0.931265	0.0952804	1.58	0.0956997	1.3968	0.00732919	1.2941	0.0471724	1.16936	0.0844822	1.4531	0.150634	1.00443	0.0123361	0.685243	0.0223459	0.483271
PMM0253	PMED4_02581	photosystem II reaction center PsbI protein	16.373	0.00035461	8.8	0.929859	1	0.9643	8.0 Photosynthesis and respiration	8.6 Photosystem II	1.82386	0.0703554	1.69684	0.128536	1.11364	0.259379	1.07099	0.0332497	0.660357	0.395883	0.919027	0.10482	0.834935	0.212536	0.770086	0.153803	0.777577	0.260836	1.04793	0.0455196	1.29784	0.0243458	1.39776	0.116857	1.55515	0.351814	1.5463	0.23532	1.50939	0.215744	1.05078	0.224072	0.838205	0.0733934	0.70366	0.0471906	0.698319	0.087744	0.717233
PMM0254	PMED4_02591	conserved hypothetical protein	10.8394	0.114443	5.4	0.623724	17	1	16.0 Hypothetical	16.1 Conserved hypothetical protein	1.91117	0.24867	1.02935	0.429175	0.96315	0.0894255	0.826384	0.222364	0.646273	0.227773	0.908054	0.00128636	0.996894	0.214092	0.998652	0.0531318	0.979845	0.154252	0.988153	0.0458721	1.21779	0.0944165	1.30195	0.311483	1.32039	0.258411	0.962822	0.0667963	0.961327	0.0459571	0.902457	0.0700821	0.840742	0.00187731	0.803636	0.12497	0.981495	0.083991	0.997485
PMM0255	PMED4_02601	leuD 3-isopropylmalate dehydratase small subunit	15.5207	0.000574713	17.4	0.89274	5	0.788274	1.0 Amino acid biosynthesis	1.3 Branched chain family	1.02648	0.163884	0.783915	0.150567	1.05544	0.0683593	1.14718	0.0722134	1.14084	0.213399	1.33837	0.0492159	1.30074	0.00123414	1.03269	0.0479326	0.938961	0.111381	0.810823	0.153178	0.825208	0.0704721	0.827573	0.0538088	0.844619	0.0149011	0.828995	0.0650283	1.02781	0.213218	1.3223	0.12737	1.62876	0.276741	1.35932	0.0656775	1.23641	0.0873523	0.995746
PMM0256	PMED4_02611	leuC 3-isopropylmalate dehydratase large subunit	16.2704	0.000296736	15.2	0.954443	4	0.993919	1.0 Amino acid biosynthesis	1.3 Branched chain family	0.847237	0.0768639	0.941054	0.0990628	1.45411	0.139599	1.62268	0.299569	1.64549	0.0637108	1.44326	0.0999775	1.05377	0.0263404	0.941695	0.0348097	0.75176	0.0768845	0.698617	0.0156057	0.752583	0.0360295	0.812243	0.0411188	0.941648	0.127283	1.09486	0.104452	1.38766	0.0716715	1.93639	0.230703	1.75834	0.044448	1.51453	0.0812249	1.13489	0.0237406	0.90771
PMM0257	PMED4_02621	Molybdenum cofactor biosynthesisprotein	15.5265	0.0004329	17.2	0.894839	5	0.778519	2.0 Biosynthesis of cofactors, prosthetic groups, and carriers	2.7 Molybdopterin	0.945742	0.136857	0.674153	0.208817	1.31832	0.322239	1.48796	0.6972	1.88675	0.268864	2.16927	0.273565	1.53556	0.362438	1.0323	0.154425	0.853555	0.0837536	0.760222	0.199507	0.767785	0.270438	0.629484	0.0381615	0.800559	0.115857	0.759101	0.057948	1.27176	0.0994334	1.91513	0.178362	2.68166	0.165475	2.39685	0.304845	1.66609	0.0890147	1.10353
PMM0258	PMED4_02631	glyA Serine hydroxymethyltransferase (SHMT)	16.6734	0	16.6	0.966225	5	0.903666	15.0 Other categories	15.7 Other	0.664449	0.0146985	0.879215	0.0180734	2.30313	0.182918	4.38079	0.0802895	5.07209	1.33618	5.3439	0.694109	2.67638	0.0158645	1.44066	0.161434	0.759552	0.0301435	0.747135	0.104564	0.657813	0.0480966	0.615858	1.07784e-05	0.664031	0.0788406	0.916383	0.0207211	2.4441	0.316705	5.38589	0.682558	6.10228	0.723943	5.72032	0.402537	3.14843	0.174702	1.55708
PMM0259	PMED4_02641	conserved hypothetical protein	12.0422	0.0575055	7.4	0.683117	1	0.486897	16.0 Hypothetical	16.1 Conserved hypothetical protein	1.23307	0.110643	1.03001	0.175867	0.835647	0.141652	0.833655	0.108045	0.775904	0.29728	0.82914	0.129847	0.935127	0.169214	0.973259	0.0323292	0.927267	0.104085	0.960641	0.0679355	1.1454	0.0352057	1.25507	0.396196	1.31002	0.275909	1.12401	0.259137	1.10199	0.047593	1.01122	0.00575611	0.974716	0.215806	0.696381	0.00484962	0.763764	0.0196759	0.843989
PMM0260	PMED4_02651	conserved hypothetical protein	9.46759	0.208158	6	0.541771	18	1	16.0 Hypothetical	16.1 Conserved hypothetical protein	1.48943	0.329445	1.15737	0.228244	0.931157	0.0520482	0.974959	0.49858	0.784474	0.328334	0.95259	0.177641	0.952967	0.0284152	0.98457	0.154254	0.927031	0.0758382	0.999982	0.00837379	1.20094	0.0964947	1.25743	0.361089	1.22386	0.374846	0.865052	0.41936	0.995925	0.134428	0.985056	0.0898752	1.04115	0.375747	0.744968	0.131594	0.908914	0.148476	0.956358
PMM0261	PMED4_02661	conserved hypothetical protein	15.1432	0.00148233	19.2	0.860013	6	0.620871	16.0 Hypothetical	16.1 Conserved hypothetical protein	0.957572	0.122294	0.564536	0.114106	0.846111	0.00101532	1.12826	0.177504	1.18575	0.52371	1.37428	0.044048	1.59467	0.134125	1.41997	0.138933	1.0334	0.108056	0.915472	0.101422	0.965333	0.19581	0.598783	0.114974	0.828348	0.146938	0.654436	0.116425	0.954986	0.179784	1.1536	0.0368134	1.52471	0.0480597	1.30034	0.0481443	1.28818	0.0795387	1.11357
PMM0262	PMED4_02671	putative sugar fermentation stimulation protein	14.1306	0.00852895	18.6	0.804907	6	0.80894	10.0 Regulatory functions	10.0 Regulatory functions	0.915153	0.220982	0.579418	0.107035	0.883805	0.0200646	0.840255	0.00518321	1.07678	0.385463	1.31508	0.106117	1.21493	0.0371077	1.22267	0.0209216	1.0267	0.0317816	0.808131	0.155763	0.854196	0.201391	0.816138	0.157622	0.906158	0.156491	0.965988	0.196103	1.0564	0.0888294	1.33811	0.116452	1.43568	0.0441511	1.33003	0.0680189	1.40063	0.00569783	1.10236
PMM0263	PMED4_02681	amt1 Ammonium transporter family	16.87	0	19.2	0.957962	6	0.355385	14.0 Transport and binding proteins	14.0 Transport and binding proteins	0.677532	0.0141077	0.796504	0.0339696	0.9194	0.0430116	1.13197	0.0173702	1.24384	0.0270472	1.34045	0.00566589	1.33253	0.0873014	1.20579	0.0391736	1.04807	0.0103084	0.971961	0.0115631	0.843096	0.00294166	0.622695	0.00318593	0.543686	0.0485486	0.634041	0.0362576	0.862257	0.0113547	1.08482	0.0403487	1.16647	0.0143167	1.2668	0.0452146	1.28027	0.0211432	1.16835
PMM0264	PMED4_02691	lytB LytB protein homolog	15.6792	0.000319489	18.6	0.892285	6	0.554071	3.0 Cell envelope	3.2 Murein sacculus and peptidoglycan	0.979831	0.0470678	0.790551	0.139454	1.05803	0.263774	1.43736	0.76802	1.73015	0.927814	1.81739	0.0469055	1.96125	0.0168341	1.2865	0.0984087	0.949831	0.079129	0.86778	0.0619412	0.835494	0.107293	0.762289	0.122312	0.812588	0.135252	0.836682	0.0408931	0.912959	0.0854642	1.07527	0.0352897	1.40215	0.215016	1.47374	0.235293	1.56815	0.223966	1.09257
PMM0265	PMED4_02701	conserved hypothetical protein	16.8952	0	7.4	0.958644	1	0.988356	16.0 Hypothetical	16.1 Conserved hypothetical protein	1.68653	0.0664957	1.28448	0.0884994	1.24507	0.347984	1.02506	0.35912	0.870876	0.179482	0.53193	0.111222	0.522167	0.0461244	0.654226	0.0462209	0.783429	0.0214228	1.03306	0.056328	1.21282	0.0380938	1.26768	0.00946559	1.36665	0.101072	1.25609	0.114463	1.09011	0.00826103	0.87745	0.0683614	0.768679	0.103831	0.485442	0.0251857	0.517995	0.0160239	0.595068
PMM0266	PMED4_02711	purH AICARFT/IMPCHase bienzyme	16.2448	0.0002849	19.4	0.921869	6	0.837104	9.0 Purines, pyrimidines, nucleosides, and nucleotides	9.2 Purine ribonucleotide biosynthesis	0.72485	0.0543795	0.592267	0.1559	0.81596	0.112007	1.19113	0.251234	1.20526	0.294342	1.9236	0.0995038	1.54192	0.131939	1.23746	0.0432919	1.02524	0.0605199	0.872233	0.0739984	0.889962	0.0667789	0.702691	0.0911722	0.62619	0.0668344	0.559219	0.095782	0.839931	0.00164099	1.24769	0.124006	1.74692	0.353067	1.88769	0.192233	1.75776	0.0945642	1.17598
PMM0267	PMED4_02721	probable esterase	15.8871	0.000395257	2.6	0.934748	13	0.94606	15.0 Other categories	15.7 Other	1.26952	0.244334	0.950798	0.00908493	0.652891	0.051507	0.486194	0.00747289	0.452288	0.172378	0.65592	0.00218092	0.99854	0.0078061	1.32843	0.192211	1.47013	0.0487214	1.39135	0.00696844	1.44117	0.00251954	1.27767	0.141945	0.970428	0.00838539	0.74832	0.110477	0.654333	0.048092	0.511754	0.03541	0.471875	0.00227368	0.497117	0.00142927	0.892637	0.139053	1.20833
PMM0268	PMED4_02731	conserved hypothetical protein	16.3169	0.000316456	0.4	0.954927	10	0.76961	16.0 Hypothetical	16.1 Conserved hypothetical protein	0.646747	0.0264067	0.626141	0.087207	0.546253	0.0462816	0.52441	0.0902145	0.590757	0.0865551	1.02089	0.0399695	1.34399	0.23706	1.58971	0.0181269	1.46628	0.137201	1.45727	0.0881669	1.37626	0.0956593	1.16054	0.0750301	0.700804	0.240499	0.693526	0.260271	0.584747	0.126521	0.598438	0.0363883	0.662889	0.239711	0.893643	0.0478012	1.34278	0.030297	1.66022
PMM0269	PMED4_02741	two-component sensor histidine kinase	14.9243	0.00320248	19.6	0.846519	7	0.83593	10.0 Regulatory functions	10.0 Regulatory functions	1.08923	0.189522	0.627222	0.0534795	0.794548	0.00535729	0.957365	0.0853527	1.14543	0.312543	1.7565	0.108184	2.02117	0.0841128	1.47795	0.000484576	1.00915	0.00764231	0.81194	0.0957248	0.934359	0.171525	0.84279	0.0330833	0.896986	0.133867	0.747633	0.0582567	0.900815	0.147514	1.05423	0.128286	1.3352	0.227447	1.67055	0.210878	1.98424	0.0498539	1.37646
PMM0270	PMED4_02751	CobS Cobalamin-5-phosphate synthase CobS	5.53162	0.600719	18	0.316443	18	1	2.0 Biosynthesis of cofactors, prosthetic groups, and carriers	2.3 Cobalamin, heme, phycobilin and porphyrin	1.33109	0.443936	1.03697	0.0636212	1.04214	0.0381771	1.08912	0.339437	0.856429	0.282658	1.11224	0.105729	1.32039	0.0791618	1.27104	0.267557	1.02535	0.0300286	0.899197	0.214465	1.06439	0.421037	0.910232	0.10895	1.07826	0.0844601	0.835459	0.151208	0.971107	0.0130386	1.06439	0.196539	0.997664	0.109994	0.866837	0.0667813	1.01454	0.0730422	0.911292
PMM0271	PMED4_02761	tgt tRNA-guanine transglycosylase	9.63015	0.195652	23	0.555835	18	1	13.0 Translation	13.1 Aminoacyl tRNA synthetases and tRNA modification	0.960797	0.0555261	0.860354	0.127286	0.878063	0.0950147	0.776044	0.187956	0.798432	0.0157522	1.03499	0.058786	0.92616	0.133641	1.13073	0.00273794	0.977394	0.021432	0.915618	0.181725	1.00965	0.374821	0.824069	0.162974	1.01428	0.000417507	0.985423	0.019297	0.915366	0.182213	1.06182	0.104696	1.20639	0.0018349	1.08468	0.100534	1.31521	0.176781	1.31006
PMM0272	PMED4_02771	Photosystem II protein PsbK	15.6433	0.000311042	8.2	0.887078	1	0.997299	8.0 Photosynthesis and respiration	8.6 Photosystem II	1.93256	0.0108976	1.98976	0.025993	1.63124	0.0835589	1.29882	0.00971646	0.879341	0.117846	0.670026	0.0217748	0.668467	0.0149658	0.832853	0.0327911	0.93103	0.114355	1.20602	0.00619352	1.4375	0.247032	1.64009	0.144941	1.61963	0.285913	1.57027	0.103726	1.39128	0.217855	0.967485	0.053023	0.682707	0.0335205	0.425837	0.0387932	0.457412	0.0416438	0.569188
PMM0273	PMED4_02781	probable oxidoreductase	16.3787	0.000358423	4.6	0.948691	15	0.659064	15.0 Other categories	15.7 Other	1.46867	0.210373	0.889618	0.356092	0.798666	0.00620994	0.671305	0.161737	0.591882	0.00525276	0.572296	0.0156496	0.715604	0.151773	1.00554	0.0221751	1.04915	0.0564399	1.28361	0.0519818	1.38668	0.150726	1.34011	0.027456	1.27844	0.0839525	1.05613	0.205337	0.781599	0.0464987	0.674867	0.04459	0.604427	0.0329733	0.521023	0.0472614	0.729303	0.037594	0.780694
PMM0274	PMED4_02791	conserved hypothetical protein	6.06662	0.542843	1.4	0.3571	17	1	16.0 Hypothetical	16.1 Conserved hypothetical protein	1.21694	0.146312	0.875126	0.00630206	0.800009	0.0805693	0.770853	0.0343136	0.963588	0.0677808	0.965016	0.0227368	0.922225	0.167175	1.05043	0.231158	0.994817	0.0588357	1.01515	0.00096314	1.02473	0.104325	1.06305	0.0971104	1.05365	0.18877	0.796606	0.103763	0.89331	0.0338232	1.0921	0.131426	1.12398	0.0305626	1.03966	0.0168611	0.974317	0.0490375	0.918011
PMM0275	PMED4_02801	pyrE Orotate phosphoribosyltransferase	14.4613	0.00598802	15.8	0.844631	4	0.953222	9.0 Purines, pyrimidines, nucleosides, and nucleotides	9.3 Pyrimidine ribonucleotide biosynthesis	0.827132	0.084045	0.884193	0.171045	0.938128	0.0837759	1.13475	0.0184985	1.06956	0.455413	1.36883	0.140512	1.07222	0.112116	1.03704	0.018411	0.750663	0.0616623	0.816411	0.0307289	0.926919	0.239668	0.969947	0.0500379	0.882223	0.24393	1.02104	0.233946	1.30743	0.154649	1.81495	0.0125122	1.33213	0.0905695	1.2312	0.273645	1.11218	0.0551672	0.945713
PMM0276	PMED4_02811	conserved hypothetical protein	6.66814	0.477452	23.2	0.385298	18	1	16.0 Hypothetical	16.1 Conserved hypothetical protein	0.984816	0.209324	0.521314	0.0526044	0.830138	0.0846077	0.809877	0.0268173	0.740332	0.279574	0.895765	0.0995412	0.899699	0.187859	1.00731	0.0840724	1.10356	0.0387311	0.885168	0.140668	1.1162	0.139999	0.864859	0.155985	0.959188	0.189958	0.979312	0.116168	1.0411	0.0696754	1.33792	0.210108	1.2983	0.251451	1.15856	0.239105	1.02077	0.159723	1.1278
PMM0277	PMED4_02821	conserved hypothetical protein	15.9474	0.000429185	22.8	0.917875	9	0.957862	16.0 Hypothetical	16.1 Conserved hypothetical protein	0.822968	0.0015664	0.535839	0.100746	0.516517	0.0249561	0.569859	0.0633283	0.640296	0.445806	1.16514	0.215279	1.54459	0.579571	1.65085	0.00719958	1.43713	0.0748695	1.19136	0.297349	1.13072	0.0121019	0.864165	0.0748979	0.824951	0.187633	0.631301	0.0138409	0.794081	0.154319	0.850838	0.0731309	1.04423	0.176316	1.43923	0.032506	1.69484	0.171059	1.92556
PMM0278	PMED4_02831	Phosphotransferase superclass	14.5377	0.0054386	2.8	0.855009	12	0.860948	15.0 Other categories	15.7 Other	1.20797	0.0254931	0.81777	0.0966542	0.642937	0.0806445	0.543648	0.155187	0.596987	0.274955	0.704427	0.0251361	1.02755	0.0405205	1.16839	0.034642	1.03485	0.095385	1.18761	0.0269453	1.28006	0.0266302	1.17029	0.0428469	1.10842	0.0729546	0.844569	0.0230123	0.964954	0.0496725	0.860342	0.0952898	0.770268	0.00783139	0.79395	0.107144	0.85517	0.0978858	1.1128
PMM0279	PMED4_02841	conserved hypothetical protein	12.0835	0.0557714	22.4	0.693797	9	0.435286	16.0 Hypothetical	16.1 Conserved hypothetical protein	1.02387	0.1147	0.577938	0.105393	0.592233	0.137517	0.584776	0.0537156	0.629004	0.179901	1.05305	0.151056	1.33035	0.224596	1.2507	0.107651	1.10791	0.10974	0.884755	0.119273	0.887536	0.0704412	0.882505	0.0825265	0.964415	0.308084	0.84726	0.0939365	0.854262	0.0812777	1.09198	0.0754962	1.21942	0.212305	1.14289	0.0225558	1.31723	0.0740329	1.22747
PMM0280	PMED4_02851	Retinal pigment epithelial membrane protein	16.5127	0	9.2	0.939618	2	0.996637	15.0 Other categories	15.7 Other	2.15199	0.370859	1.82167	0.107482	1.30078	0.171235	0.76916	0.0322394	0.811125	0.322912	0.515264	0.0481555	0.612607	0.0841016	0.569329	0.178418	0.57024	0.16005	0.751091	0.103411	1.05413	0.0376003	1.27279	0.165392	2.37838	0.339078	1.72075	0.0499856	1.54415	0.123898	1.10185	0.103534	1.10171	0.0723896	0.60254	0.0405945	0.617773	0.180314	0.587195
PMM0281	PMED4_02861	hisB Imidazoleglycerol-phosphate dehydratase	16.0262	0.000455581	3.8	0.936643	13	0.464797	1.0 Amino acid biosynthesis	1.1 Aromatic amino acid family	1.55872	0.113967	0.975418	0.191127	0.748119	0.206763	0.528287	0.3136	0.50819	0.100175	0.653179	0.00539671	0.892133	0.217691	0.960592	0.0334716	1.15208	0.207327	1.40031	0.184416	1.614	0.185404	1.66067	0.185242	1.26732	0.210344	0.884839	0.261944	0.637651	0.106543	0.495875	0.0308676	0.539062	0.171671	0.642617	0.0683162	0.771954	0.143138	0.88285
PMM0282	PMED4_02871	fabI enoyl-[acyl-carrier-protein] reductase	16.8879	0	5	0.975395	16	0.984916	7.0 Fatty acid, phospholipid and sterol metabolism	7.0 Fatty acid, phospholipid and sterol metabolism	1.69477	0.101679	1.49219	0.0400542	0.888304	0.0395299	0.525256	0.099576	0.355586	0.0812055	0.464153	0.0266066	0.714375	0.0240342	0.91636	0.00519205	1.07554	0.197736	1.46203	0.0395505	1.7553	0.0861598	1.86335	0.128723	1.62564	0.262805	1.17055	0.173684	0.752109	0.0790457	0.491379	0.0652693	0.417159	0.103915	0.43387	0.0929767	0.628642	0.0417986	0.781697
PMM0283	PMED4_02881	conserved hypothetical protein	16.7964	0	4.4	0.975197	15	0.462039	16.0 Hypothetical	16.1 Conserved hypothetical protein	1.45075	0.281934	1.10454	0.159537	0.98546	0.227623	0.650553	0.144855	0.410567	0.0228227	0.458105	0.163634	0.609496	0.112404	0.997652	0.0211935	1.07827	0.274949	1.50473	0.494855	2.11901	0.141755	1.59179	0.297981	1.30877	0.471851	0.963877	0.0265324	0.868847	0.15653	0.578448	0.0530857	0.475901	0.170122	0.408796	0.0216837	0.599049	0.022012	0.955052
PMM0284	PMED4_02891	degT putative pleiotropic regulatory protein	15.2452	0.000839329	3.8	0.89096	12	0.606797	10.0 Regulatory functions	10.0 Regulatory functions	1.23232	0.0687777	0.65584	0.227632	0.623514	0.0968185	0.480954	0.20371	0.480631	0.0077413	0.490938	0.116107	0.748452	0.15172	0.909701	0.123794	1.13381	0.112592	1.21342	0.189418	1.30162	0.167888	1.34393	0.142834	1.26318	0.168984	1.03286	0.136726	0.931357	0.0423702	0.800456	0.0124008	0.618818	0.0293625	0.581184	0.00457497	0.875787	0.0152058	1.09312
PMM0285	PMED4_02901	phr putative DNA photolyase	15.1902	0.00116686	6.4	0.866451	16	0.560558	11.0 DNA replication, recombination, and repair	11.0 DNA replication, recombination, and repair	1.3995	0.111074	1.30297	0.174914	1.02109	0.0756596	0.730574	0.250312	0.847585	0.164693	0.636151	0.0162675	0.733623	0.0289454	0.87128	0.0733307	0.947648	0.0777111	0.927424	0.0352181	1.30346	0.268484	1.18153	0.0949672	1.59915	0.500404	1.12371	0.102558	1.13074	0.0322308	0.802347	0.162611	0.814892	0.00764268	0.64878	0.0198158	0.76098	0.171978	0.781652
PMM0286	PMED4_02911	NUDIX hydrolase	16.9422	0	8	0.960538	1	0.992114	15.0 Other categories	15.7 Other	1.73149	0.23556	1.59297	0.0803268	1.36705	0.219391	0.849832	0.0889546	0.694592	0.334994	0.601666	0.0645058	0.678239	0.178685	0.687721	0.187511	0.833603	0.0819878	1.01379	0.0554009	1.36018	0.159575	1.50736	0.00959523	1.75385	0.00477583	1.48146	0.198186	1.47913	0.0238367	0.940767	0.168474	0.758236	0.192633	0.533603	0.149318	0.568103	0.0350723	0.671652
PMM0287	PMED4_02921	folK possible2-amino-4-hydroxy-6-hydroxymethyldihydropteridinepyrophosphokinase	11.9491	0.0614674	4.6	0.692542	15	0.619896	2.0 Biosynthesis of cofactors, prosthetic groups, and carriers	2.4 Folic acid	1.23338	0.276345	0.994191	0.0421995	0.714154	0.190858	0.621007	0.142811	0.633823	0.376603	0.613357	0.134408	0.908927	0.0237758	0.972283	0.0505391	1.05051	0.261486	1.11143	0.110713	1.14542	0.300865	1.11887	0.0125551	1.24687	0.0825737	0.985945	0.111035	0.977767	0.0404091	1.00918	0.0227066	0.957562	0.0175883	0.860671	0.0018497	1.01691	0.229906	0.97937
PMM0288	PMED4_02931	chlD Protoporphyrin IX Magnesium chelatase, ChlDsubunit	16.6806	0	5.2	0.96027	16	0.956201	2.0 Biosynthesis of cofactors, prosthetic groups, and carriers	2.3 Cobalamin, heme, phycobilin and porphyrin	1.42669	0.0255681	1.13958	0.111375	0.826934	0.0580161	0.53016	0.000895213	0.462475	0.134011	0.540591	0.0150024	0.716457	0.0571082	0.876575	0.0292782	0.939105	0.0835697	1.12541	0.0734108	1.32207	0.0875907	1.49487	0.145315	1.34442	0.210711	1.13842	0.109943	0.939465	0.0877941	0.715676	0.0941023	0.592045	0.0718825	0.566239	0.0387876	0.751383	0.0224404	0.885028
PMM0289	PMED4_02941	possible ABC transporter	15.4179	0.000806452	19	0.875646	6	0.799833	14.0 Transport and binding proteins	14.0 Transport and binding proteins	0.681251	0.134524	0.72919	0.240147	1.01303	0.213421	1.22613	0.610125	1.45931	0.0258254	1.81272	0.0273236	1.36729	0.322651	1.12721	0.0238822	0.899329	0.129233	1.02242	0.0302427	0.937424	0.0979152	0.940018	0.0201531	0.746482	0.176327	0.754488	0.0982868	0.849014	0.0754368	1.32617	0.15679	1.59753	0.695054	1.85826	0.115935	1.69407	0.159896	1.19024
PMM0290	PMED4_02951	possible ABC transporter, ATP binding component	16.3495	0.000341297	19.2	0.92848	6	0.842016	14.0 Transport and binding proteins	14.0 Transport and binding proteins	0.762516	0.0396246	0.604832	0.0705954	0.764241	0.117693	1.21103	0.155005	1.3241	0.625068	2.00811	0.0741245	1.4947	0.0263695	1.37566	0.0305303	1.07193	0.0890449	0.931775	0.0978367	0.952442	0.0397618	0.784452	0.00384262	0.644869	0.0317707	0.595005	0.0160212	0.80376	0.00126747	1.25413	0.15606	1.89068	0.365801	1.72104	0.145912	1.51571	0.0461674	1.27901
PMM0291	PMED4_02961	conserved hypothetical protein	15.7958	0.000362319	1.8	0.930676	11	0.73766	16.0 Hypothetical	16.1 Conserved hypothetical protein	1.03169	0.0491445	0.800802	0.119183	0.778789	0.0936643	0.725993	0.198513	0.736102	0.0531167	0.762828	0.0454929	0.972682	0.0968715	1.16962	0.051333	1.13682	0.041741	1.23483	0.00965534	1.20863	0.00703022	1.07373	0.131208	0.92414	0.102559	0.797237	0.0469169	0.722633	0.0426355	0.763232	0.0621048	0.881957	0.0880795	0.827585	0.00694289	1.00134	0.000960864	1.13996
PMM0292	PMED4_02971	ndhJ putative respiratory-chain NADH dehydrogenasesubunit	15.1856	0.00128205	19.4	0.861331	7	0.549036	8.0 Photosynthesis and respiration	8.4 NADH dehydrogenase	0.923214	0.0636216	0.675601	0.0977542	0.919323	0.346572	1.0156	0.366773	1.04555	0.297151	1.72008	0.332104	1.52299	0.228442	1.26774	0.119371	0.954641	0.0893529	0.89965	0.109486	0.932996	0.0464877	0.92965	0.153188	0.878939	0.0698821	0.793191	0.187014	0.918017	0.0850479	1.12182	0.0125254	1.6073	0.167975	1.54104	0.0913123	1.43531	0.102531	1.28333
PMM0293	PMED4_02981	ndhK putative respiratory-chain NADH dehydrogenasesubunit	15.5638	0.000445765	19.2	0.883802	6	0.857108	8.0 Photosynthesis and respiration	8.4 NADH dehydrogenase	0.737548	0.0465723	0.728541	0.0514816	0.791281	0.215544	1.14111	0.375443	1.47942	0.152634	2.02004	0.207047	1.59913	0.180451	1.32886	0.0813621	1.00732	0.195803	0.999959	0.0128396	0.980087	0.0135422	0.842968	0.0856542	0.833505	0.161239	0.699093	0.111078	0.900251	0.11627	1.45046	0.151911	1.84665	0.599767	1.84672	0.12553	1.60267	0.169837	1.40429
PMM0294	PMED4_02991	ndhC putative NADH Dehydrogenase (complex I) subunit(chain 3)	16.344	0.000337838	18	0.934831	5	0.653172	8.0 Photosynthesis and respiration	8.4 NADH dehydrogenase	0.837651	0.0595326	0.699195	0.0364223	1.04228	0.136706	1.76636	0.640717	2.09164	0.154808	2.40405	0.239679	2.24979	0.192951	1.56941	0.0803926	1.01696	0.115703	0.907035	0.0216998	0.88703	0.0847441	0.843241	0.105572	0.780754	0.201989	0.702307	0.0918965	0.992416	0.127361	1.5623	0.160811	2.05024	0.748146	1.89763	0.0955064	1.78464	0.0977317	1.24932
PMM0295	PMED4_03001	rub probable rubredoxin	17.1714	0	7.6	0.973739	1	0.997595	15.0 Other categories	15.7 Other	2.24455	0.284628	2.22918	0.0359044	1.29931	0.377427	0.722835	0.179669	0.380469	0.309452	0.40962	0.0388232	0.481576	0.113075	0.593501	0.0723536	0.728176	0.163826	0.999861	0.0235578	1.54417	0.0576463	1.78806	0.235534	2.26044	0.515007	1.72072	0.362516	1.42881	0.0334652	0.856572	0.00777046	0.680122	0.1416	0.36858	0.118817	0.468599	0.0274972	0.514569
PMM0296	PMED4_03011	conserved hypothetical protein	16.7772	0	6.6	0.955829	16	0.940575	16.0 Hypothetical	16.1 Conserved hypothetical protein	1.68179	0.148367	1.55092	0.0556023	1.16986	0.0994457	0.708685	0.0818173	0.45611	0.145007	0.413542	0.0448597	0.587653	0.0286565	0.732136	0.0318127	0.866738	0.0283375	1.05662	0.128186	1.26651	0.0468208	1.33098	0.136869	1.54228	0.237336	1.28598	0.190521	0.974664	0.0761541	0.70357	0.00305409	0.543204	0.095395	0.413812	0.0497063	0.541491	0.0915875	0.666558
PMM0297	PMED4_03021	psbE Cytochrome b559 alpha-subunit	16.4312	0	11.2	0.951068	3	0.98774	8.0 Photosynthesis and respiration	8.6 Photosystem II	1.22278	0.110672	1.34713	0.136275	1.21775	0.100953	1.11829	0.043779	1.07636	0.119156	0.997437	0.0640018	0.820393	0.0524234	0.797515	0.0450906	0.743432	0.0709631	0.86459	0.0949202	0.972506	0.0444602	1.06569	0.0221633	1.18524	0.0976933	1.31604	0.109803	1.31138	0.080897	1.23041	0.0365841	1.06902	0.0569424	0.885416	0.0276743	0.737265	0.00267478	0.709331
PMM0298	PMED4_03031	psbF Cytochrome b559 beta-subunit	15.9644	0.000436681	11.8	0.928734	3	0.998943	8.0 Photosynthesis and respiration	8.6 Photosystem II	1.33624	0.157454	1.48336	0.062092	1.53763	0.0717344	1.43111	0.0967793	1.43382	0.127518	1.0558	0.116048	0.934227	0.0411296	0.789479	0.13833	0.755358	0.00774832	0.873238	0.00770306	0.995221	0.0140017	1.09756	0.0852944	1.23542	0.0369747	1.38657	0.0611021	1.41766	0.0355611	1.25096	0.0936912	1.15759	0.0209707	0.915173	0.108392	0.729577	0.0400249	0.667954
PMM0299	PMED4_03041	psbL photosystem II PsbL protein	15.2924	0.000865266	9.8	0.87292	2	0.898063	8.0 Photosynthesis and respiration	8.6 Photosystem II	1.33123	0.13845	1.29536	0.417384	1.35803	0.503267	1.14791	0.567727	1.13236	0.638021	0.883528	0.107723	0.556597	0.196456	0.571401	0.147141	0.625645	0.256061	0.810005	0.16407	1.12206	0.0664864	1.09895	0.208997	1.26994	0.344996	1.37709	0.425397	1.27012	0.0166983	1.23514	0.080413	1.2464	0.11197	0.838571	0.0639924	0.663599	0.189305	0.574942
PMM0300	PMED4_03051	psbJ photosytem II PsbJ protein	15.9274	0.00041841	11.6	0.923993	3	0.995287	8.0 Photosynthesis and respiration	8.6 Photosystem II	1.48494	0.0268589	1.56294	0.0426748	1.58597	0.0641716	1.36527	0.010098	1.30767	0.0179213	1.04549	0.0786694	0.851921	0.00418574	0.781908	0.0691662	0.752817	0.085374	0.82756	0.0105328	0.994218	0.0517079	1.10824	0.085784	1.22432	0.208511	1.27951	0.10331	1.28429	0.0986179	1.20383	0.00903883	1.0994	0.134508	0.901072	0.000453333	0.75261	0.0409518	0.631106
PMM0301	PMED4_03061	5'-methylthioadenosine phosphorylase	15.6785	0.000318979	21.4	0.892626	8	0.538382	15.0 Other categories	15.7 Other	0.777891	0.00372946	0.637806	0.00358626	0.901046	0.0965838	0.999652	0.359134	0.88384	0.109085	1.1897	0.000450456	1.38842	0.203909	1.39334	0.0484514	1.13521	0.0459322	1.02235	0.037466	0.975104	0.0960347	0.874981	0.060788	0.787969	0.114741	0.67459	0.0137067	0.774815	0.00901859	0.974769	0.0404672	1.28043	0.236619	1.30391	0.122308	1.46761	0.0861961	1.50839
PMM0302	PMED4_03071	selD Selenide,water dikinase	15.1523	0.00148741	22	0.866747	9	0.869423	6.0 Energy metabolism	6.5 Sugars	0.927885	0.141004	0.637196	0.0413102	0.814051	0.0370845	0.831556	0.159199	0.961955	0.164384	1.1294	0.0156526	1.19886	0.0854385	1.18868	0.147218	1.04261	0.0356961	0.997408	0.0433951	1.12002	0.320311	0.906001	0.131181	0.875424	0.0387486	0.658106	0.00704022	0.814637	0.0722504	0.971408	0.0102019	1.03457	0.0389114	1.17675	0.00131372	1.28317	0.0239723	1.21035
PMM0303	PMED4_03081	tRNA nucleotidyltransferase/poly(A) polymerase	12.6633	0.0343284	21.6	0.721928	9	0.414541	12.0 Transcription	12.2 RNA synthesis, modification, and DNA transcription	1.03322	0.218539	0.89467	0.056293	0.843833	0.173351	0.770216	0.0577613	1.00924	0.0713874	1.07249	0.139031	1.04303	0.0249245	1.00932	0.0170456	1.14187	0.0824968	0.922463	0.113928	0.94487	0.151554	0.915263	0.0795755	0.951626	0.102319	0.860382	0.0265672	0.881716	0.152704	0.973703	0.060857	1.14508	0.117962	1.12139	0.108175	1.26856	0.243326	1.1624
PMM0304	PMED4_03091	uvrD UvrD/REP helicase	13.4899	0.0167355	21.2	0.767069	8	0.65757	11.0 DNA replication, recombination, and repair	11.0 DNA replication, recombination, and repair	1.04054	0.0552364	0.654337	0.0630147	0.708114	0.0826105	0.667812	0.0443284	0.860783	0.274927	1.11447	0.00730241	1.27143	0.142504	1.22447	0.0483975	1.11703	0.193936	0.957309	0.0982959	0.882951	0.064601	0.781593	0.0449836	0.94234	0.0734833	0.860584	0.083409	0.89227	0.0146512	1.03371	0.00562655	1.23717	0.0981734	1.23207	0.0632504	1.29542	0.217343	1.22024
PMM0305	PMED4_03111	cpeB Phycobilisome protein	15.0199	0.00237325	8.2	0.851733	2	0.486773	8.0 Photosynthesis and respiration	8.7 Phycobilisome	1.19866	0.332872	1.4067	0.459693	0.908747	0.0596719	0.8134	0.329925	0.61309	0.204159	0.879855	0.0051816	0.70057	0.0775938	0.791326	0.145394	0.827096	0.0928191	0.928014	0.0369259	1.26931	0.118484	1.39022	0.227221	1.56343	0.375665	1.37983	0.27263	1.40942	0.0043274	1.25254	0.034164	1.11413	0.16642	0.827766	0.0594329	0.699989	0.0936911	0.767272
PMM0306	PMED4_03121	cpeS phycoerythrin linker protein CpeS homolog	15.6835	0.000320513	7	0.89068	1	0.837866	8.0 Photosynthesis and respiration	8.7 Phycobilisome	2.6595	0.694355	1.43828	0.0764106	1.19846	0.195025	0.705871	0.0138521	0.648103	0.221839	0.637976	0.00621511	0.734031	0.112082	0.819183	0.00791185	0.88632	0.120511	1.01285	0.0825179	1.28707	0.145455	1.30869	0.0201654	1.46458	0.0708458	1.45381	0.140568	1.10674	0.0629465	0.948119	0.0103739	0.636128	0.0227345	0.541683	0.0349171	0.660187	0.141428	0.732468
PMM0307	PMED4_03131	hypothetical	16.4458	0	7.6	0.932715	1	0.996931	16.0 Hypothetical	16.2 No similarity	1.67716	0.25895	1.68044	0.297224	1.10535	0.483832	0.672509	0.320321	0.406396	0.343695	0.564684	0.0446116	0.602104	0.162382	0.750184	0.109588	0.905253	0.0438397	1.05126	0.0529093	1.28372	0.00773972	1.41905	0.0198842	1.44534	0.0158144	1.64059	0.0476348	1.37247	0.0396578	0.912843	0.0991253	0.560796	0.0673616	0.493957	0.0184542	0.593971	0.0656534	0.696281
PMM0308	PMED4_03141	conserved hypothetical protein	14.2293	0.00748792	4.8	0.823325	16	0.76049	16.0 Hypothetical	16.1 Conserved hypothetical protein	1.46563	0.114761	1.14273	0.0569386	1.08437	0.0710227	0.783635	0.0120524	0.58037	0.176701	0.691355	0.108512	0.997534	0.058773	0.995901	0.111763	1.03917	0.0940834	1.04363	0.0656658	1.20205	0.146694	1.17097	0.0393963	1.09599	0.102645	0.903259	0.11842	0.902547	0.0114123	0.714649	0.0947646	0.660014	0.0995528	0.625152	0.0223601	0.879527	0.0208211	0.926022
PMM0309	PMED4_03151	possible Pollen allergen	15.0211	0.00237581	22	0.859685	9	0.988021	15.0 Other categories	15.7 Other	1.00917	0.00202828	0.610659	0.00265889	0.720691	0.0446603	0.652992	0.0653405	0.734999	0.169473	1.18272	0.149009	1.74785	0.325592	1.77287	0.186426	1.25036	0.021291	1.09821	0.119904	0.995913	0.104529	0.84628	0.00243302	0.922676	0.0951289	0.750923	0.0322513	0.709737	0.0233428	1.02188	0.0881852	1.09112	0.352889	1.21207	0.180499	1.73435	0.210479	1.62153
PMM0310	PMED4_03161	Carbohydrate kinase, FGGY family	14.8275	0.00382728	4	0.865032	15	0.447446	15.0 Other categories	15.7 Other	1.33953	0.0760403	0.959542	0.0935798	0.947912	0.0714809	0.780279	0.00536593	0.73042	0.218174	0.782772	0.0140857	0.985643	0.00610606	1.06655	0.0569084	0.976408	0.110064	1.11411	0.058694	1.16932	0.0899803	1.17759	0.27548	1.15866	0.0761576	0.967742	0.141395	0.890076	0.113316	0.771373	0.012933	0.802765	0.00636521	0.787924	0.00961941	0.933809	0.075134	1.1305
PMM0311	PMED4_03171	metK S-adenosylmethionine synthetase	16.0234	0.000454545	5.4	0.921521	16	0.995889	1.0 Amino acid biosynthesis	1.2 Aspartate family	1.29352	0.103815	1.18684	0.0846441	0.950777	0.0478361	0.629118	0.0231256	0.454378	0.0995639	0.551195	0.0315837	0.698933	0.0807316	0.917356	0.010124	0.929369	0.0972098	1.04249	0.0482019	1.11699	0.0536607	1.1381	0.112322	1.13773	0.128905	1.06859	0.0727644	0.976123	0.0498652	0.732982	0.0352333	0.579297	0.0441584	0.553778	0.0197007	0.684587	0.142678	0.896892
PMM0312	PMED4_03181	rps1a, rpsA1 30S ribosomal protein S1, homolog A	16.2681	0.000295858	4.2	0.946928	13	0.916413	13.0 Translation	13.2 Ribosomal proteins	1.25008	0.0876022	1.05109	0.17042	0.612154	0.0509526	0.327797	0.00853907	0.182622	0.100423	0.308752	0.0175534	0.597244	0.152963	0.924011	0.164897	1.28555	0.127579	1.34002	0.0587986	1.38293	0.0409016	1.36964	0.0508867	1.1281	0.216363	1.0275	0.0195486	0.71664	0.0654357	0.444377	0.0306895	0.286574	0.0286412	0.328112	0.0438865	0.59432	0.102199	0.927083
PMM0313	PMED4_03191	conserved hypothetical protein	14.2106	0.00752	23	0.820882	9	0.589186	16.0 Hypothetical	16.1 Conserved hypothetical protein	0.826096	0.0690294	0.628666	0.14563	0.538126	0.00763082	0.428347	0.1144	0.538148	0.186048	1.29961	0.14387	1.309	0.429281	1.30893	0.270555	1.26807	0.12293	1.11126	0.0650377	0.994527	0.00571839	1.03304	0.0134664	0.747499	0.16735	0.635566	0.210761	0.716973	0.111484	0.969315	0.00419325	1.06008	0.0173995	1.46653	0.296883	1.6367	0.182454	1.62946
PMM0314	PMED4_03201	psbT Photosystem II PsbT protein	16.9639	0	9.8	0.968762	2	0.622381	8.0 Photosynthesis and respiration	8.6 Photosystem II	1.38688	0.0458461	1.41132	0.0117806	1.32269	0.0302421	1.22843	0.170716	1.11936	0.175403	0.707672	0.101732	0.642058	0.0119731	0.582085	0.0154295	0.656176	0.0607541	0.83591	0.0676807	1.00073	0.00474955	1.11572	0.0576832	1.2876	0.00673796	1.28667	0.0718848	1.28761	0.0102426	1.16337	0.172125	0.940926	0.0929892	0.745097	0.160351	0.616452	0.0264068	0.568825
PMM0315	PMED4_03211	psbB Photosystem II PsbB protein (CP47)	16.4218	0	10	0.938359	1	0.651533	8.0 Photosynthesis and respiration	8.6 Photosystem II	1.34539	0.0351163	1.33441	0.0755764	1.32205	0.0580374	1.18472	0.00740761	1.05683	0.0267751	0.782726	0.0682712	0.778235	0.0660568	0.715597	0.044785	0.745056	0.00856769	0.91159	0.033215	1.00309	0.0391844	1.15467	0.0469939	1.21811	0.0606758	1.23602	0.0725461	1.24936	0.0346354	1.07377	0.0503493	0.927992	0.0247281	0.746882	0.104407	0.68138	0.0204981	0.627986
PMM0316	PMED4_03221	possible ferredoxin	17.1845	0	9.6	0.980357	2	0.97097	8.0 Photosynthesis and respiration	8.8 Soluble electron carriers	2.2375	0.042816	2.23086	0.256075	1.63021	0.174499	1.0869	0.087057	0.940523	0.158302	0.534224	0.0666728	0.411998	0.00539364	0.381497	0.0487112	0.420513	0.0347726	0.595645	0.0760881	1.06551	0.127566	1.4869	0.215186	2.81213	0.465224	2.29731	0.0418114	1.8542	0.0966918	1.07074	0.0725886	1.10426	0.11716	0.49222	0.00905465	0.419158	0.0498754	0.373252
PMM0317	PMED4_03231	psbM possible Photosystem II reaction center M protein(PsbM)	16.4706	0	9.4	0.938183	2	0.579407	8.0 Photosynthesis and respiration	8.6 Photosystem II	1.26918	0.19012	1.36086	0.243383	1.12958	0.0237435	1.04887	0.0307757	0.804437	0.235275	0.750032	0.0461845	0.586697	0.132386	0.569628	0.0737946	0.679282	0.174962	0.877273	0.185162	1.14638	0.192394	1.27984	0.160342	1.38348	0.363154	1.32121	0.227821	1.39068	0.100122	1.27221	0.105219	0.996176	0.0262667	0.688366	0.107651	0.559069	0.00756859	0.640115
PMM0318	PMED4_03241	hemK putative protein methyltransferase	14.759	0.00410305	7.6	0.837188	1	0.823326	2.0 Biosynthesis of cofactors, prosthetic groups, and carriers	2.3 Cobalamin, heme, phycobilin and porphyrin	1.49709	0.538096	1.23785	0.249664	0.9999	0.0317691	1.14754	0.236403	0.768502	0.200239	0.872267	0.107261	0.911102	0.173089	0.953377	0.0679971	0.941057	0.22122	1.10502	0.178908	1.35635	0.00249882	1.50375	0.401126	1.38957	0.346206	1.14476	0.223817	1.10837	0.132384	1.05035	0.0266248	0.984119	0.163284	0.73832	0.0189626	0.708288	0.186752	0.75715
PMM0319	PMED4_03251	conserved hypothetical protein	13.4692	0.0171016	23.6	0.782888	10	0.932237	16.0 Hypothetical	16.1 Conserved hypothetical protein	0.928646	0.0681199	0.570398	0.0549109	0.514644	0.0354152	0.69934	0.142137	0.797212	0.15151	1.06274	0.104265	1.04269	0.226277	1.19018	0.0980836	1.10492	0.143563	1.02212	0.100782	1.17149	0.12126	0.946362	0.00705301	0.887826	0.0413078	0.798614	0.015215	0.803206	0.116445	0.953167	0.0260778	1.097	0.213408	1.03267	0.164872	1.31985	0.291668	1.23142
PMM0320	PMED4_03271	minE possible septum site-determining protein MinE	17.0661	0	16.8	0.987542	5	0.874711	4.0 Cellular processes	4.1 Cell division	0.58553	0.047868	0.855853	0.207491	1.50617	0.447671	2.26989	0.530269	2.34598	1.13729	3.40831	0.119763	2.13722	0.1998	1.36539	0.155229	0.697805	0.00261005	0.539365	0.120504	0.49231	0.0711357	0.448988	0.0448137	0.449662	0.0523508	0.816435	0.0280153	1.72332	0.0159702	2.87035	0.197724	3.54438	0.00771542	3.63736	0.147071	2.22929	0.126854	1.29185
PMM0321	PMED4_03281	minD putative septum site-determining protein MinD	16.9401	0	16.4	0.984082	4	0.882497	4.0 Cellular processes	4.1 Cell division	0.467184	0.13018	0.811083	0.257058	1.73686	0.313581	2.79807	0.125335	2.45798	1.38511	3.51483	0.593694	2.07544	0.347371	1.19822	0.0985949	0.512833	0.0134218	0.422789	0.010481	0.361215	0.109696	0.386541	0.0351754	0.427543	0.111443	1.0107	0.0287525	2.33862	0.22244	4.00207	0.840774	4.42335	0.139489	3.33803	0.409623	2.14528	0.460502	1.05918
PMM0322	PMED4_03291	minC possible septum site-determining protein	12.7726	0.031269	17	0.737924	4	0.525648	4.0 Cellular processes	4.1 Cell division	1.19875	0.186821	0.825723	0.0682684	0.810241	0.176124	0.85802	0.0273332	1.01663	0.532657	1.44522	0.212268	1.35538	0.0710964	1.21195	0.116059	0.850148	0.0897084	0.677397	0.180099	0.849829	0.0431754	0.803837	0.011129	1.02628	0.289035	0.913526	0.125555	1.03986	0.0396625	1.46947	0.478303	1.24129	0.136469	1.15335	0.0935115	1.31789	0.00687877	0.967435
PMM0323	PMED4_03301	conserved hypothetical protein	16.1275	0.000508906	22	0.922932	9	0.934805	16.0 Hypothetical	16.1 Conserved hypothetical protein	0.907672	0.0859896	0.509327	0.0897668	0.593677	0.100017	0.643696	0.0863103	0.838964	0.248106	1.39281	0.0582168	1.44561	0.164239	1.59119	0.175439	1.2378	0.162278	1.22178	0.0176321	1.25219	0.238438	0.802871	0.0869335	0.678019	0.0394021	0.477706	0.0232522	0.675646	0.155962	0.874015	0.120968	1.08471	0.0618069	1.30666	0.141777	1.47491	0.33304	1.55081
PMM0324	PMED4_03311	ctpA PDZ domain (also known as DHR or GLGF)	16.5134	0	21	0.938656	7	0.827991	4.0 Cellular processes	4.5 Detoxification	0.602678	0.0133479	0.485667	0.051911	0.673963	0.0986926	0.931264	0.163854	1.18349	0.0964519	1.60637	0.0990412	1.42451	0.0392492	1.46393	0.146289	1.17066	0.078543	1.06832	0.0619619	0.956652	0.0375226	0.806389	0.0390717	0.524071	0.0686679	0.423014	0.0456253	0.54371	0.0959472	0.899047	0.197388	1.12067	0.209159	1.36233	0.119115	1.4131	0.0560576	1.31247
PMM0325	PMED4_03321	petB Cytochrome b6	16.6838	0	15.6	0.976647	4	0.999168	8.0 Photosynthesis and respiration	8.3 Cytochrome b6/f complex	0.928401	0.100135	1.18869	0.0116463	1.55503	0.485014	1.87129	0.56466	2.18831	0.542368	1.70778	0.142656	1.34367	0.0652223	0.961313	0.051286	0.671287	0.071638	0.662828	0.0965452	0.728333	0.0023583	0.734171	0.052702	0.95161	0.140308	1.06327	0.136019	1.46676	0.122749	1.88233	0.0648543	1.83292	0.224693	1.68216	0.00546966	1.35547	0.0241783	0.917119
PMM0326	PMED4_03331	petD PetD protein (subunit IV of the Cytochrome b6fcomplex)	16.4225	0	15.8	0.959648	4	0.991827	8.0 Photosynthesis and respiration	8.3 Cytochrome b6/f complex	1.02428	0.0406706	1.07134	0.0445756	1.21934	0.0229414	1.40226	0.0131515	1.52655	0.0695331	1.53735	0.0944919	1.32828	0.10464	0.995148	0.0125556	0.749784	0.0272156	0.812082	0.0424616	0.766952	0.0481066	0.765787	0.007909	0.856363	0.081309	0.966404	0.086138	1.19867	0.140466	1.43506	0.0788681	1.48605	0.172067	1.36836	0.0560928	1.11655	0.0188249	0.864378
PMM0327	PMED4_03341	putative neutral invertase-like protein	15.3525	0.000909091	22.6	0.882162	9	0.500553	15.0 Other categories	15.7 Other	0.823336	0.0383087	0.630325	0.0649042	0.678945	0.0498688	0.768242	0.0694298	0.917615	0.117839	1.1162	0.00126154	1.20439	0.122216	1.19932	0.0533025	1.17973	0.0165435	1.26667	0.00414111	1.17336	0.0808415	0.907742	0.00431375	0.736207	0.0942372	0.688504	0.0604876	0.835367	0.0183859	0.973959	0.0301834	1.19774	0.183734	1.16826	0.0646328	1.21761	0.000241761	1.21095
PMM0328	PMED4_03351	FPG Formamidopyrimidine-DNA glycolase (FAPY-DNAglycolase)	14.8631	0.00348953	5.6	0.853548	16	0.932571	11.0 DNA replication, recombination, and repair	11.0 DNA replication, recombination, and repair	1.6693	0.204893	1.26839	0.3182	1.05041	0.200367	0.784267	0.359575	0.659941	0.049288	0.584126	0.0352657	0.734843	0.131885	0.804269	0.00154923	0.933082	0.124626	1.1621	0.0325405	1.23207	0.108502	1.20718	0.148989	1.14564	0.158852	1.08293	0.0131188	0.924102	0.115853	0.812726	0.0371999	0.565376	0.00082082	0.592685	0.0457601	0.793218	0.0191323	0.842368
PMM0329	PMED4_03361	psaE Photosystem I PsaE protein (subunit IV)	16.3364	0.000333333	7.4	0.927052	1	0.991776	8.0 Photosynthesis and respiration	8.5 Photosystem I	1.4627	0.595666	1.67091	0.172601	1.00435	0.528795	0.81754	0.24427	0.432263	0.360139	0.597444	0.0161539	0.596949	0.0884814	0.736087	0.116642	0.924599	0.103384	1.15766	0.0298623	1.34628	0.294279	1.5595	0.11975	1.44655	0.256909	1.35611	0.212636	1.22949	0.0968564	0.913948	0.0241245	0.56654	0.0289337	0.479414	0.0363961	0.53208	0.0325852	0.633662
PMM0330	PMED4_03371	possible LysM domain	15.9236	0.000416667	17.6	0.913957	5	0.966838	10.0 Regulatory functions	10.0 Regulatory functions	0.537273	0.00368926	0.423084	0.0953696	1.25341	0.0999548	1.9862	0.729347	2.94618	0.58575	3.56452	0.0560189	1.71074	0.543034	1.19642	0.0240294	0.755353	0.0649304	0.76231	0.0497473	0.624895	0.0875578	0.684405	0.107587	0.504763	0.208812	0.507845	0.0277474	1.33592	0.199492	3.36165	0.315213	4.04885	1.05923	3.79107	0.0350257	2.5015	0.462044	1.41415
PMM0331	PMED4_03381	Putative aldehyde dehydrogenase	15.9959	0.000444444	6.8	0.909994	16	0.36038	6.0 Energy metabolism	6.4 Pyruvate and acetyl-CoA metabolism	1.30434	0.0459232	1.14519	0.316774	0.97876	0.0663941	0.695527	0.110472	0.693539	0.170991	0.778161	0.00601631	0.730764	0.041174	0.789703	0.0722511	0.852133	0.0962534	0.932567	0.0662518	1.26614	0.128367	1.26269	0.224887	1.21905	0.327764	1.16245	0.199235	1.10206	0.117066	1.02326	0.0512137	0.851427	0.0201557	0.819346	0.0440788	0.868244	0.0493574	0.829204
PMM0332	PMED4_03391	possible Rhomboid family	13.9606	0.0105184	8.4	0.79189	2	0.529668	15.0 Other categories	15.7 Other	1.10898	0.00673266	1.15513	0.167072	1.08824	0.152234	0.875668	0.0831051	0.904734	0.125397	0.906182	0.162143	0.953074	0.0511333	0.857707	0.119656	0.894454	0.163331	0.906754	0.105017	1.1474	0.0721788	1.01883	0.120195	1.15535	0.071555	1.0665	0.0344137	1.36104	0.552575	0.941259	0.0957937	0.889823	0.151202	0.840314	0.018039	0.879669	0.21692	0.861831
PMM0333	PMED4_03401	rimI GCN5-related N-acetyltransferase	1.63858	0.955722	11.6	0.0951678	18	1	15.0 Other categories	15.7 Other	1.43808	0.214932	0.870642	0.13047	0.762197	0.0406422	0.735739	0.111758	0.900653	0.276929	1.07208	0.0404124	1.01222	0.0721092	1.03362	0.0841232	0.834619	0.232393	0.846781	0.102932	1.08975	0.244888	0.931477	0.0257184	1.17571	0.0562474	0.975082	0.12139	0.93712	0.165992	0.972161	0.0627202	1.33894	0.294223	1.04598	0.0732244	0.980795	0.131637	0.864888
PMM0334	PMED4_03411	conserved hypothetical protein	9.55495	0.200719	7.4	0.542119	17	1	16.0 Hypothetical	16.1 Conserved hypothetical protein	1.44578	0.68764	0.896132	0.134391	0.851676	0.20115	0.814549	0.0346027	0.83548	0.428563	0.9715	0.120602	0.785472	0.0862009	0.892333	0.0143661	0.90531	0.000549763	0.936649	0.060967	1.14334	0.0500155	1.09825	0.045457	1.22248	0.155056	0.875468	0.0269719	0.959694	0.00483506	1.22017	0.0694915	1.27395	0.146629	0.927167	0.0446028	0.814212	0.146786	0.811096
PMM0335	PMED4_03451	possible NADH-PLASTOQUINONE OXIDOREDUCTASE CHAIN5 pir|...	10.4113	0.140693	23.2	0.602007	17	1	15.0 Other categories	15.7 Other	0.790379	0.0500632	0.546789	0.146917	0.63737	0.136531	0.817268	0.267713	0.936613	0.130704	1.05637	0.0263714	0.930656	0.0849971	0.9313	0.0783623	0.934863	0.0555572	0.944242	0.0594385	1.06715	0.078714	0.907887	0.134255	0.946308	0.196084	0.726764	0.106847	0.918771	0.126835	1.12605	0.0897508	1.1537	0.0821961	0.937658	0.105386	1.07616	0.0108358	1.11795
PMM0336	PMED4_03461	conserved hypothetical	13.2832	0.020396	18.2	0.75841	6	0.566888	16.0 Hypothetical	16.1 Conserved hypothetical protein	0.0659672	0.00794152	0.145127	0.020495	0.429952	0.153729	1.11093	0.192908	2.60311	0.282157	3.60033	0.0804044	1.27366	0.00387448	1.03328	0.879284	0.717355	0.37426	0.448107	0.157017	0.481846	0.38106	0.40676	0.227197	0.609087	0.184499	0.962699	0.0110984	1.57163	0.47808	3.19825	0.084999	4.3904	0.687474	4.9062	0.100801	2.95858	1.11375	1.64465
PMM0337	PMED4_03481	conserved hypothetical protein	15.8847	0.000392157	16.6	0.920474	5	0.944014	16.0 Hypothetical	16.1 Conserved hypothetical protein	0.777847	0.0345599	0.573157	0.0112156	1.90255	0.704938	5.31924	1.99512	4.52111	4.99751	6.09408	0.359562	2.38741	0.349162	1.29854	0.175423	0.846059	0.152933	0.735315	0.0868309	0.728339	0.0267423	0.738807	0.0599841	0.601031	0.0468596	0.546328	0.162122	2.0736	0.20306	6.92702	0.64427	8.88437	2.13115	6.49254	0.278665	3.12317	0.490907	1.25813
PMM0338	PMED4_03501	conserved hypothetical	13.2015	0.0217957	4.2	0.768746	15	0.358535	16.0 Hypothetical	16.1 Conserved hypothetical protein	0.961028	0.15513	0.950539	0.116484	0.790173	0.0615839	0.857315	0.162428	0.919357	0.0316243	0.98119	0.0389596	0.8743	0.072604	0.957847	0.0417807	1.067	0.0199558	1.10913	0.00619225	1.24687	0.120804	1.23729	0.108649	1.20361	0.0631358	1.00705	0.0014614	0.927595	0.0681336	0.950764	0.00833317	0.944592	0.152208	0.883249	0.0124753	0.828209	0.0104953	0.900198
PMM0339	PMED4_03521	T8L23.23 Bacterial-type phytoene dehydrogenase	8.81858	0.263076	1.8	0.519579	18	1	2.0 Biosynthesis of cofactors, prosthetic groups, and carriers	2.2 Carotenoid	1.02393	0.17342	0.663208	0.0515772	0.82285	0.0464315	0.858823	0.0696317	0.924562	0.0239265	0.854798	0.0587634	0.928054	0.12905	1.021	0.174759	0.943382	0.060309	1.03027	0.00391124	1.14415	0.222023	0.993213	0.0120322	1.04193	0.00744488	0.862203	0.0950345	1.01389	0.0685641	0.875718	0.171869	1.17653	0.0505307	0.942061	0.0813763	0.975553	0.0709728	1.05523
PMM0340	PMED4_03541	conserved hypothetical protein	11.9153	0.0624393	17	0.68732	6	0.450048	16.0 Hypothetical	16.1 Conserved hypothetical protein	0.929608	0.0146872	0.814368	0.00858661	0.941801	0.204674	0.863647	0.261287	0.915352	0.397672	1.34739	0.124884	1.0128	0.267034	1.08703	0.0111432	0.836532	0.0235116	0.836643	0.0333957	0.957069	0.0192358	0.942457	0.0405432	1.00512	0.206469	0.870707	0.00721819	1.10757	0.00912785	1.46927	0.0950388	1.58406	0.305012	1.2208	0.108642	1.42247	0.0209552	1.07514
PMM0341	PMED4_03551	conserved hypothetical	6.5948	0.484346	21	0.374546	17	1	16.0 Hypothetical	16.1 Conserved hypothetical protein	0.987077	0.0078383	0.83377	0.184372	0.813035	0.0280464	0.711497	0.0396802	0.706659	0.369913	1.048	0.00935369	1.04204	0.150767	1.10714	0.0260853	0.943764	0.0849951	0.966031	0.0163413	1.08519	0.0992929	1.04278	0.125984	0.946138	0.281265	0.845249	0.117936	1.02241	0.0331624	1.32928	0.0636871	1.28581	0.0950223	0.991211	0.0222678	1.07987	0.0768526	0.968675
PMM0342	PMED4_03561	possible Helper component proteinase	14.9082	0.00337769	18	0.852112	6	0.93733	15.0 Other categories	15.7 Other	0.845922	0.19722	0.575933	0.0681196	0.944241	0.0320978	1.07139	0.258504	1.30226	0.135655	1.64625	0.170396	1.4203	0.206442	1.39872	0.165429	0.909462	0.0297803	0.707372	0.106336	0.860941	0.115717	0.809966	0.0747862	0.809814	0.108533	0.795455	0.258257	1.21276	0.0519631	1.68731	0.114166	2.26265	0.184983	1.68551	0.143131	1.56701	0.0759969	1.30031
PMM0343	PMED4_03581	mttA/Hcf106 family	14.5266	0.00557977	18.4	0.827852	6	0.940102	15.0 Other categories	15.7 Other	0.721792	0.246798	0.71139	0.235737	0.596991	0.228725	0.844742	0.127147	0.964779	0.450285	1.80692	0.38813	1.33164	0.764093	1.24511	0.444779	0.91294	0.356785	0.789597	0.0686095	0.897688	0.0065225	0.785751	0.286606	0.743759	0.451654	0.760792	0.294862	1.21649	0.150299	2.13573	0.152939	2.23383	0.636125	2.07139	0.526189	1.8159	0.413957	1.32824
PMM0344	PMED4_03601	possible Influenza non-structural protein (NS2	14.6295	0.00471869	17.2	0.843541	4	0.450439	10.0 Regulatory functions	10.0 Regulatory functions	0.889819	0.00615973	0.951577	0.0833504	0.942121	0.128336	1.19383	0.560927	1.60862	0.161515	1.50727	0.231002	1.58213	0.0327431	1.15447	0.0411429	0.69698	0.113649	0.666323	0.0410186	0.950488	0.051716	0.76298	0.0404492	0.989268	0.242092	0.821096	0.107789	1.0747	0.159887	1.24298	0.0607862	1.56299	0.649965	1.179	0.179465	1.42261	0.0288313	1.07085
PMM0345	PMED4_03621	putative bacterioferritin comigratory protein	13.9899	0.0100834	10.8	0.805832	2	0.873361	14.0 Transport and binding proteins	14.0 Transport and binding proteins	1.4808	0.136563	1.62426	0.326665	1.17287	0.0476525	0.894972	0.14411	0.786703	0.240179	0.927393	0.120012	1.08358	0.220449	0.928566	0.149018	0.714113	0.0514522	0.826413	0.177062	0.855945	0.0071914	1.14447	0.165985	2.09679	0.834123	1.55552	0.466643	1.43124	0.338239	1.02956	0.0455995	1.25494	0.16506	0.972054	0.0101476	0.897519	0.224819	0.74354
PMM0346	PMED4_03631	conserved hypothetical protein	16.7122	0	6.4	0.953413	16	0.974661	16.0 Hypothetical	16.1 Conserved hypothetical protein	1.79765	0.397725	1.69721	0.0639765	1.18518	0.119527	0.575624	0.0581656	0.359137	0.0623626	0.330292	0.0399255	0.443274	0.100222	0.682313	0.0409451	0.988929	0.013471	1.35796	0.0304407	1.66914	0.28032	2.17215	0.290675	1.86762	0.521319	1.35488	0.231906	1.04572	0.0639527	0.530947	0.0254974	0.342691	0.0150056	0.263551	0.0401902	0.392718	0.097202	0.532821
PMM0347	PMED4_03641	conserved hypothetical	1.44209	0.964648	2.2	0.0849608	17	1	16.0 Hypothetical	16.1 Conserved hypothetical protein	1.36988	0.177195	0.808136	0.142706	0.799049	0.106295	0.828142	0.363944	0.809589	0.078074	0.856316	0.193523	1.11894	0.140816	0.907134	0.121135	0.74241	0.323881	0.857838	0.202281	0.879994	0.16617	0.852959	0.103057	1.35279	0.245032	1.23421	0.207276	1.3022	0.197618	0.947653	0.149709	1.20959	0.397246	1.00156	0.403238	1.86325	0.960143	1.42551
PMM0348	PMED4_03661	possible Spectrin repeat	7.48144	0.392938	22.4	0.429042	17	1	15.0 Other categories	15.7 Other	0.413527	0.16038	0.304356	0.0404315	0.297787	0.135593	0.365696	0.101922	0.330951	0.185669	0.977306	0.400017	0.945338	0.684589	0.702996	0.172482	0.739866	0.327814	0.909296	0.125321	0.847624	0.218147	1.00795	0.136266	0.84607	0.209313	0.797443	0.112446	1.47994	0.534763	1.71266	0.522716	1.59912	0.852029	1.865	0.894231	2.76386	0.718037	2.09084
PMM0349	PMED4_03671	Class I peptide chain release factor	7.06774	0.434784	23	0.408244	18	1	13.0 Translation	13.5 Protein modification and translation factors	1.22449	0.15717	0.866454	0.234615	0.689228	0.00381873	0.581938	0.0863538	0.801647	0.157786	0.956095	0.226263	1.11384	0.00351117	0.906379	0.0055136	0.834991	0.0177076	0.933733	0.091634	0.98782	0.0997005	0.876322	0.0658445	1.00275	0.268043	0.765005	0.302449	0.882068	0.095529	0.98111	0.0481046	1.32266	0.444588	1.14744	0.159317	1.38697	0.294264	1.1707
PMM0350	PMED4_03681	possible TIR domain	4.21184	0.739768	12.8	0.24706	18	1	10.0 Regulatory functions	10.0 Regulatory functions	1.30909	0.21519	1.00976	0.119673	1.03658	0.0710058	0.875292	0.0538058	1.01621	0.232568	1.17585	0.183428	1.01216	0.321273	0.93508	0.10445	0.759934	0.102161	0.757904	0.00463833	1.10261	0.103296	1.07199	0.158187	1.16394	0.226246	0.882169	0.0812623	1.04117	0.12002	1.07858	0.0739132	1.09942	0.141885	0.919007	0.00151341	1.1741	0.24293	0.963738
PMM0351	PMED4_03701	possible Small, acid-soluble spore proteins, a	16.0935	0.000496278	18	0.920557	5	0.887994	2.0 Biosynthesis of cofactors, prosthetic groups, and carriers	2.3 Cobalamin, heme, phycobilin and porphyrin	0.644995	0.0736013	0.394141	0.0754766	0.882157	0.10549	1.3814	0.212775	1.58519	1.20795	2.51023	0.0683973	2.00537	0.260191	1.56379	0.0780272	1.10275	0.0867958	0.841726	0.230004	0.807799	0.165052	0.614148	0.079597	0.616955	0.173116	0.551858	0.0891834	1.45582	0.00749703	2.24977	0.0959014	2.7557	0.0858611	2.04371	0.0994589	1.94246	0.0778891	1.11741
PMM0352	PMED4_03711	Abortive infection protein	13.3608	0.019383	17.6	0.766552	6	0.624451	14.0 Transport and binding proteins	14.0 Transport and binding proteins	0.969714	0.047558	0.855217	0.316667	1.02907	0.124248	1.01776	0.029493	1.03997	0.062641	1.21723	0.155765	1.15019	0.225044	1.00693	0.0369997	0.79949	0.138395	0.801924	0.00434254	0.943285	0.180447	0.894599	0.0851658	0.939384	0.215618	0.839133	0.0977652	1.00071	0.00999997	1.09288	0.282066	1.37242	0.0810522	1.10782	0.176808	1.20592	0.113651	1.03669
PMM0353	PMED4_03721	Glycosyl transferase family 11	10.7779	0.117703	21.8	0.615814	18	1	15.0 Other categories	15.7 Other	1.1273	0.0300861	0.842504	0.0827877	0.867477	0.12569	0.919684	0.279405	0.905402	0.117959	1.07313	0.0670114	1.23599	0.148674	1.06947	0.103587	0.955166	0.0484205	0.944239	0.0650174	1.00093	0.188433	0.98003	0.0174808	0.954281	0.099354	0.758437	0.169426	1.00243	0.0275375	1.00338	0.0654369	1.13388	0.0840163	0.978117	0.0322246	1.2614	0.111865	1.15281
PMM0354	PMED4_03731	possible Glycosyl transferase	5.52948	0.600654	5.4	0.318195	18	1	15.0 Other categories	15.7 Other	1.40526	0.250962	0.952344	0.097116	0.933621	0.0908488	0.648465	0.0174517	0.795872	0.209611	0.861489	0.120916	0.87998	0.0781631	0.912813	0.122849	0.827884	0.0820028	0.907424	0.0955992	1.13218	0.16263	1.2707	0.246579	0.903778	0.0351285	1.07351	0.371981	1.02883	0.284284	1.14925	0.045633	1.13513	0.204796	0.984101	0.0253302	1.1542	0.0435724	1.04659
PMM0355	PMED4_03761	conserved hypothetical protein	16.6093	0	18.4	0.947305	5	0.883468	16.0 Hypothetical	16.1 Conserved hypothetical protein	0.560038	0.0584005	0.659771	0.132528	1.11413	0.129575	1.59581	0.0356412	1.37945	0.666892	1.99488	0.319784	1.82868	0.119238	1.49991	0.124844	1.05943	0.213442	0.939509	0.0347552	0.820171	0.0823313	0.731245	0.0758231	0.526423	0.0390771	0.573927	0.0496229	0.979766	0.0316219	1.4211	0.20338	1.4192	0.154718	1.54278	0.114745	1.51394	0.30352	1.24821
PMM0356	PMED4_03791	Alpha/beta hydrolasefold	16.2904	0.00030303	9.8	0.930804	2	0.621162	7.0 Fatty acid, phospholipid and sterol metabolism	7.0 Fatty acid, phospholipid and sterol metabolism	1.574	0.181022	2.04519	0.223577	2.41074	0.371557	1.34737	0.301577	0.950417	0.062683	0.769622	0.0272583	0.856104	0.143037	0.791689	0.00441427	0.679132	0.0236086	0.964292	0.123176	1.24147	0.128641	1.60358	0.227899	1.84091	0.16559	2.24993	0.0745921	2.12915	0.254082	1.53629	0.237284	0.950321	0.0443701	0.779235	0.0105737	0.740126	0.0809876	0.637822
PMM0357	PMED4_03811	TENA/THI-4 protein	11.312	0.0880201	4.8	0.654797	15	0.47328	15.0 Other categories	15.7 Other	1.53246	0.137582	1.11466	0.0660942	0.905458	0.0122327	0.713608	0.0980383	0.653264	0.250598	0.821671	0.0339175	0.932499	0.0688862	1.10559	0.00977491	0.868439	0.0750656	0.857695	0.0851546	1.29483	0.182702	1.07444	0.350054	1.3417	0.0409235	0.852732	0.187289	0.951091	0.0837786	0.854493	0.182061	0.947728	0.112041	0.839241	0.0590748	1.02013	0.0325045	1.01159
PMM0358	PMED4_03821	thiD Phosphomethylpyrimidine kinase	11.2442	0.0916376	1.8	0.662403	11	0.833336	2.0 Biosynthesis of cofactors, prosthetic groups, and carriers	2.11 Thiamine	1.33748	0.127171	0.896219	0.0126209	0.813002	0.144477	0.694343	0.095529	0.760391	0.138081	0.881627	0.182917	1.2285	0.0289855	1.18953	0.125253	0.990841	0.0213083	1.06543	0.0464458	1.10315	0.261803	1.08102	0.0293568	1.11716	0.0885645	0.793952	0.0982299	0.860322	0.0433392	0.89108	0.042135	0.848123	0.236859	0.795301	0.152907	1.17149	0.325366	1.11354
PMM0359	PMED4_03831	hypothetical	16.0973	0.000498753	18	0.92064	6	0.594759	16.0 Hypothetical	16.2 No similarity	0.892368	0.15157	0.585441	0.0941606	0.906355	0.158446	1.24511	0.0251994	1.63256	0.836278	2.79562	0.26406	1.98204	0.0226833	1.36422	0.284657	0.895933	0.0193077	0.866028	0.345054	0.76781	0.163465	0.707406	0.162382	0.712148	0.0731027	0.536216	0.0941144	0.893372	0.136413	1.89744	0.0695094	2.69583	0.238394	2.32573	0.453177	1.79486	0.11213	1.36984
PMM0360	PMED4_03851	conserved hypothetical protein	8.55018	0.289308	4.8	0.494664	18	1	16.0 Hypothetical	16.1 Conserved hypothetical protein	1.06314	0.0709046	0.890235	0.188385	0.94541	0.317899	0.869638	0.167917	0.860826	0.0638086	0.892817	0.0630464	0.860775	0.10388	1.07204	0.0237917	0.9929	0.222334	1.02831	0.0993615	1.06086	0.370242	0.948091	0.0678394	1.08818	0.0889294	1.05345	0.109367	1.17994	0.0102099	0.983291	0.261794	1.01582	0.0231397	0.828587	0.0372659	1.037	0.15159	0.942717
PMM0361	PMED4_03861	possible Phosphoenolpyruvate carboxykinase	7.6985	0.371625	23.6	0.446728	18	1	6.0 Energy metabolism	6.4 Pyruvate and acetyl-CoA metabolism	1.14918	0.139918	0.888918	0.0871922	0.75919	0.045431	1.02005	0.251693	0.884839	0.297265	0.909922	0.0392961	1.11624	0.14195	1.15318	0.15316	0.975968	0.127532	0.98553	0.264187	1.03431	0.170434	0.920157	0.057504	0.987711	0.0722242	0.909047	0.0297646	1.07664	0.254431	1.06106	0.121378	0.908822	0.122935	1.04062	0.139144	1.06937	0.174695	0.978915
PMM0362	PMED4_03871	hypothetical	4.61044	0.700343	12.4	0.269884	18	1	16.0 Hypothetical	16.2 No similarity	1.0814	0.161819	0.901221	0.0277353	1.2213	0.413809	0.94798	0.0118663	1.07901	0.027984	1.02375	0.303585	0.95323	0.152271	1.04453	0.310149	0.944862	0.148493	1.05571	0.15886	1.05228	0.241429	1.04593	0.0739552	1.15627	0.671698	1.2402	0.0559841	1.13893	0.472969	1.02594	0.205457	1.20422	0.435974	0.927293	0.121711	0.975602	0.191223	1.26593
PMM0363	PMED4_03881	possible MarR family	13.2113	0.0214193	2.4	0.778047	12	0.815113	10.0 Regulatory functions	10.0 Regulatory functions	1.02486	0.433402	0.570523	0.124445	0.443051	0.146653	0.390261	0.0771195	0.516146	0.185186	0.791079	0.0366738	0.883251	0.15804	1.04636	0.0771506	1.03502	0.0524396	1.05255	0.0664925	1.24493	0.0448401	1.17123	0.0984442	1.06037	0.216247	0.775037	0.107333	0.763649	0.0895737	0.929144	0.165468	0.966917	0.316545	0.831551	0.00919153	0.980659	0.196508	1.15782
PMM0364	PMED4_03911	possible Malic enzyme	16.5405	0	18.6	0.942241	5	0.675134	15.0 Other categories	15.7 Other	0.261368	0.0218437	0.550159	0.0598965	0.984479	0.143256	1.4987	0.0821351	1.33406	0.531782	2.15093	0.215956	2.02931	0.00730625	1.61724	0.227953	1.11388	0.192658	0.753089	0.0438641	0.512233	0.0276717	0.183328	0.00145335	0.21527	0.0134968	0.440831	0.0765863	1.05299	0.181089	1.37955	0.0963448	1.5286	0.324816	1.79027	0.0196392	1.7493	0.416357	1.51997
PMM0365	PMED4_03921	possible DsrE-like protein	16.7479	0	18.2	0.956803	5	0.851342	15.0 Other categories	15.7 Other	0.448971	0.0351427	0.507043	0.0584319	0.999857	0.0239158	1.22859	0.106897	1.40686	0.641492	1.79955	0.127948	1.72994	0.158627	1.4261	0.0105584	0.925449	0.0284274	0.709196	0.00107154	0.489219	0.077768	0.302569	0.0131055	0.379419	0.0579618	0.606341	0.0679857	1.24346	0.203084	1.78209	0.0498012	1.83107	0.437504	1.78315	0.135724	1.6632	0.202308	1.37435
PMM0366	PMED4_03931	Type-1 copper (blue) domain	12.5891	0.0367986	17.4	0.723271	6	0.327408	14.0 Transport and binding proteins	14.0 Transport and binding proteins	0.869912	0.0818862	0.947656	0.0604229	0.977635	0.0390923	0.798546	0.0428253	1.07835	0.0518004	1.28034	0.113329	1.18016	0.0528309	1.12687	0.0392025	0.971518	0.0346671	0.761557	0.0625788	0.844619	0.0150418	0.780595	0.0850502	1.16186	0.180247	0.894444	0.141431	1.02668	0.0165078	1.02255	0.0293467	1.13733	0.0866004	1.16115	0.0377359	1.17498	0.0481656	1.08087
PMM0367	PMED4_03941	conserved hypothetical protein	15.4579	0.000831025	19.4	0.876989	7	0.645817	16.0 Hypothetical	16.1 Conserved hypothetical protein	0.965574	0.226126	0.857553	0.00708559	1.24288	0.0418473	1.33661	0.214581	1.44772	0.172086	2.62766	0.350468	3.5554	0.299928	2.35162	0.470709	1.45717	0.110325	0.964667	0.0897982	0.828947	0.0687954	0.656895	0.0352007	0.530174	0.0156303	0.521374	0.0210099	0.742544	0.0157278	0.806076	0.170664	1.04067	0.0333078	1.75046	0.0656658	2.51446	0.259252	1.60833
PMM0368	PMED4_03951	conserved hypothetical protein	16.9507	0	20.6	0.961997	7	0.875519	16.0 Hypothetical	16.1 Conserved hypothetical protein	0.363031	0.109441	0.301614	0.0125324	0.710303	0.143834	0.984681	0.151138	1.40435	0.0662827	1.67933	0.03101	2.06721	0.00259636	1.89912	0.167087	1.42235	0.0950114	1.05304	0.0735857	0.783967	0.0401037	0.577034	0.0633262	0.420025	0.00678854	0.320619	0.0403945	0.599167	0.0177313	0.992065	0.00790599	1.34986	0.193019	1.76482	0.0816179	1.89182	0.0120394	2.09334
PMM0369	PMED4_04021	possible Ribosomal protein S14p/S29e	15.164	0.00149597	0	0.883307	10	0.6811	15.0 Other categories	15.7 Other	0.958167	0.00345006	0.625719	0.128236	0.670352	0.224685	0.705831	0.0449052	0.862167	0.132945	0.928088	0.107475	1.2612	0.193616	1.32335	0.00402595	1.13077	0.0592201	1.21459	0.201662	1.17809	0.26358	1.02465	0.0318111	0.937625	0.0049986	0.702551	0.112786	0.845568	0.128344	0.868915	0.0298161	0.8748	0.163911	0.980666	0.133951	1.22489	0.0715857	1.24451
PMM0370	PMED4_04031	putative cyanate ABC transporter, substratebinding protein	12.2229	0.0510783	10.6	0.703341	3	0.641515	14.0 Transport and binding proteins	14.0 Transport and binding proteins	3.12507	1.02227	2.54827	0.611638	2.20948	0.0644605	1.69555	0.0270246	1.36278	0.742018	0.764723	0.313628	0.482962	0.170539	0.420641	0.0933698	0.858267	0.014255	1.45282	1.03806	1.00769	0.0393648	0.671853	0.0236359	1.22525	0.31216	1.34824	0.109389	1.35625	0.2934	1.44134	0.451408	1.30285	0.210864	0.805665	0.0969222	0.436164	0.0646929	0.33825
PMM0371	PMED4_04041	putative cyanate ABC transporter	8.75407	0.269139	11	0.50544	17	1	14.0 Transport and binding proteins	14.0 Transport and binding proteins	2.69088	0.679148	1.88077	0.234566	1.95947	0.386761	1.62992	0.670303	1.28257	0.113094	0.871098	0.109601	0.761903	0.124418	0.851263	0.00662926	0.959153	0.148636	0.975785	0.0516762	1.07158	0.268452	0.796139	0.0378655	1.05822	0.0576105	0.921975	0.0419692	1.11242	0.169007	1.10302	0.0583528	1.09826	0.0286058	0.847893	0.0953922	0.843104	0.131036	0.762249
PMM0372	PMED4_04051	putative cyanate ABC transporter	8.35888	0.307695	12.4	0.488923	18	1	14.0 Transport and binding proteins	14.0 Transport and binding proteins	1.52657	0.430832	1.24454	0.346054	1.20528	0.263562	1.03306	0.15739	1.08521	0.197402	0.879303	0.137487	1.0352	0.0660049	0.81901	0.0346032	0.94891	0.0716146	0.902156	0.114579	0.929429	0.278711	0.827736	0.0983516	0.951723	0.201932	1.04131	0.00279071	1.17192	0.237142	0.956846	0.135113	1.10091	0.0153652	1.04944	0.242645	0.886604	0.15092	0.99549
PMM0373	PMED4_04061	cynS Cyanate lyase	13.3814	0.0191375	11.2	0.774286	3	0.910896	15.0 Other categories	15.7 Other	1.68321	0.0555479	1.7343	0.360027	1.93885	0.371006	1.47146	0.114516	1.25139	0.489564	0.872408	0.0946609	0.616102	0.0266332	0.502428	0.0228428	0.860183	0.0750284	0.839254	0.180225	1.10163	0.0324779	0.985308	0.0968205	1.10538	0.102282	1.16443	0.0351426	1.18488	0.102352	1.20604	0.0883161	1.12601	0.00443142	1.04682	0.0520417	0.472263	0.0758434	0.513414
PMM0374	PMED4_04071	mttA/Hcf106 family	7.03358	0.437865	22.8	0.405069	18	1	15.0 Other categories	15.7 Other	1.22386	0.0398078	0.912525	0.100196	0.868797	0.0392567	1.05012	0.167839	1.01097	0.28541	0.926956	0.225566	1.20176	0.0577286	1.24981	0.0105355	1.17049	0.228477	1.02909	0.14756	0.98282	0.0212354	1.09325	0.204716	1.08593	0.113642	0.807549	0.047692	0.859383	0.30317	0.990649	0.0192472	1.01907	0.0266569	0.952569	0.0405923	1.03129	0.112278	1.00407
PMM0375	PMED4_04081	possible Type II intron maturase	8.9573	0.252005	10.6	0.514614	18	1	14.0 Transport and binding proteins	14.0 Transport and binding proteins	1.14705	0.139553	1.0581	0.0868205	1.22678	0.207199	1.07756	0.277639	0.999545	0.164342	1.06299	0.0138489	0.889882	0.0491994	0.99284	0.107959	0.846275	0.0961759	1.07796	0.000737147	1.08316	0.144349	1.06638	0.127038	1.15174	0.0252954	0.900736	0.287242	1.06968	0.018931	1.04747	0.131112	1.00875	0.0225773	0.912416	0.0686876	0.847834	0.00460877	0.88695
PMM0376	PMED4_04091	hypothetical	16.8513	0	18	0.963683	5	0.711533	16.0 Hypothetical	16.2 No similarity	0.606654	0.0973397	0.690894	0.0841579	0.938075	0.0928117	1.53213	0.398936	1.79312	0.44455	2.26552	0.402778	2.11184	0.00241731	1.48837	0.152113	0.970084	0.121672	0.753218	0.0880954	0.765961	0.17155	0.677044	0.0250672	0.596774	0.0131942	0.710489	0.293548	1.31585	0.266759	2.01847	0.0935753	2.04769	0.350023	2.00359	0.239367	2.09143	0.294079	1.52947
PMM0377	PMED4_04101	hypothetical	17.3417	0	18.8	0.986781	6	0.651546	16.0 Hypothetical	16.2 No similarity	0.427364	0.0667553	0.532207	0.0782213	0.947797	0.080236	1.45508	0.23952	1.54329	0.650843	2.43066	0.360866	2.74736	0.182289	2.05412	0.326202	1.03811	0.184058	0.708723	0.0649022	0.613293	0.133322	0.442449	0.022751	0.423811	0.0185162	0.546465	0.149243	1.05945	0.095979	1.56288	0.00427519	1.90822	0.00783024	1.94952	0.126868	2.4797	0.400274	1.83951
PMM0378	PMED4_04111	conserved hypothetical protein	16.9324	0	20.6	0.960946	7	0.816816	16.0 Hypothetical	16.1 Conserved hypothetical protein	0.512786	0.0900186	0.724358	0.168912	0.966771	0.353942	0.85084	0.00835967	1.14383	0.343626	3.26077	0.457129	4.21893	0.636814	3.79099	0.202587	2.28714	0.00653949	1.42353	0.0594856	0.989895	0.061072	0.61089	0.096944	0.543762	0.033293	0.733398	0.296919	0.787669	0.0425334	0.829537	0.0488242	1.29452	0.0476937	3.16188	0.0579839	4.81161	0.192625	4.00417
PMM0379	PMED4_04161	hypothetical	16.8505	0	16.2	0.980769	4	0.940704	16.0 Hypothetical	16.2 No similarity	0.724629	0.110749	1.04927	0.0775117	1.54195	0.0837517	1.58844	0.151018	1.60263	0.927278	2.1584	0.0887499	1.45422	0.140587	1.1732	0.261451	0.751102	0.0581597	0.668123	0.15909	0.717839	0.0638016	0.721261	0.000161	0.773457	0.00405841	0.943412	0.134766	1.42269	0.160581	1.96356	0.389034	2.06401	0.231979	2.05576	0.159298	1.43253	0.0898949	1.02427
PMM0380	PMED4_04171	conserved hypothetical protein	12.6944	0.0334334	14	0.748027	4	0.566306	16.0 Hypothetical	16.1 Conserved hypothetical protein	1.06579	0.0877877	0.973538	0.018507	1.2629	0.044147	0.815578	0.264484	1.1233	0.310687	1.17195	0.0402798	1.0174	0.0927697	1.15546	0.0259661	0.816318	0.116449	0.715218	0.184971	0.976078	0.0600215	0.943871	7.89408e-05	1.30237	0.254032	1.03941	0.13577	1.28726	0.14867	1.2296	0.0328855	1.34604	0.0606704	1.02296	0.1095	1.06933	0.210389	0.954304
PMM0381	PMED4_04191	hypothetical	14.5275	0.00558952	20	0.823667	7	0.795706	16.0 Hypothetical	16.2 No similarity	1.07746	0.0150531	0.82514	0.0119308	0.988633	0.0741413	0.879342	0.0164584	1.18872	0.303028	2.4461	0.135221	3.07764	0.0170502	1.62019	0.101081	1.07715	0.260436	0.96456	0.247367	1.05247	0.216894	0.879516	0.0221837	0.904238	0.0580089	0.677413	0.11676	0.819411	0.0010291	1.03382	0.197247	1.12316	0.0958226	1.83169	0.00493359	2.56091	0.0678465	1.39771
PMM0382	PMED4_04201	possible Ribosomal RNA adenine dimethylase	13.8776	0.011547	20.6	0.787591	7	0.62899	11.0 DNA replication, recombination, and repair	11.0 DNA replication, recombination, and repair	1.0286	0.132912	0.775911	0.187469	0.925007	0.268972	0.863207	0.145682	1.05867	0.0447527	3.2946	0.406449	3.6271	0.497375	2.00918	0.294013	1.20858	0.214011	0.885029	0.154258	0.985765	0.202909	0.985286	0.0992526	0.681533	0.113172	0.593367	0.107305	0.694214	0.267514	0.780006	0.148439	0.853175	0.00662497	1.91069	0.0889756	3.57375	1.23949	1.51803
PMM0383	PMED4_04221	probable periplasmic protein	14.6102	0.0047491	20.6	0.829103	7	0.703664	14.0 Transport and binding proteins	14.0 Transport and binding proteins	1.03903	0.199001	0.660078	0.0261085	1.14343	0.307127	1.08023	0.734489	2.02828	1.14012	5.24579	0.261966	6.5932	0.0564979	3.08378	0.751622	1.40949	0.0845232	0.956305	0.0808492	0.94515	0.190683	0.904506	0.132619	0.598126	0.0213095	0.447413	0.0760513	0.579807	0.0563872	0.548992	0.0861363	0.953412	0.0606564	3.50303	0.0710914	7.70061	0.0572811	2.9091
PMM0384	PMED4_04231	spnII-interrupted-C possible uncharacterized restriction enzyme,interrupted-C	15.6623	0.000314961	20	0.88807	7	0.700118	14.0 Transport and binding proteins	14.0 Transport and binding proteins	0.761217	0.0577909	0.618335	0.0992312	0.632292	0.0879946	0.857136	0.0261076	1.0246	0.267718	1.52175	0.0939819	1.49636	0.246314	1.33289	0.0414739	1.0241	0.0212123	0.967163	0.0968863	0.870168	0.161112	0.786555	0.00463265	0.782714	0.0750424	0.686256	0.0723276	0.917425	0.0961623	1.21051	0.0547983	1.70292	0.141294	1.84586	0.101291	1.75982	0.0528169	1.482
PMM0385	NA	possible degenerate restriction endonuclease	16.3637	0.000348432	19.4	0.928672	6	0.881949	11.0 DNA replication, recombination, and repair	11.0 DNA replication, recombination, and repair	0.554218	0.047948	0.444216	0.00825387	0.695755	0.105943	1.00117	0.0942295	1.63927	0.263837	2.27455	0.0382423	1.9122	0.10093	1.51766	0.183694	1.06726	0.140624	0.872041	0.20785	0.798802	0.173601	0.674257	0.0678215	0.58313	0.0561849	0.525259	0.017059	0.866829	0.0142806	1.50396	0.143085	2.35877	0.385196	2.59488	0.255508	2.16742	0.0460667	1.65826
PMM0386	PMED4_04251	possible uncharacterized DNA methylase	14.2647	0.00731707	18	0.816288	6	0.667192	15.0 Other categories	15.7 Other	0.884996	0.0399144	0.57464	0.120388	0.826015	0.088406	1.29554	0.150538	1.46425	0.467658	1.47326	0.14656	1.32087	0.0684738	1.38191	0.347689	0.92469	0.152081	0.699961	0.214997	0.862608	0.367507	0.778073	0.100645	0.83195	0.162544	0.625193	0.0202611	0.965778	0.0471556	1.72812	0.103667	2.48646	0.0409501	1.22117	0.128068	1.60533	0.831416	1.09587
PMM0387	PMED4_04281	aroD Dehydroquinase class II	16.3875	0.000369004	20.4	0.929563	7	0.769174	1.0 Amino acid biosynthesis	1.1 Aromatic amino acid family	0.418081	0.0771506	0.382603	0.0997046	0.370576	0.0278753	0.967341	0.464853	1.25486	0.349837	2.6326	0.242982	1.97925	0.611069	1.68857	0.00195342	1.26583	0.433574	0.845895	0.0335657	0.904787	0.128396	0.692181	0.11338	0.463286	0.176107	0.479314	0.044056	0.665001	0.156046	1.35013	0.141301	2.12696	0.953491	2.32289	0.478826	2.51164	0.460948	2.01318
PMM0388	PMED4_04291	putative similar totRNA-(MS[2]IO[6]A)-hydroxylase	16.4915	0	20.2	0.935069	7	0.991661	4.0 Cellular processes	4.4 Chemotaxis	0.729715	0.239847	0.40479	0.0352504	0.654451	0.110218	0.920666	0.0945073	1.39919	0.0880573	2.2782	0.0758197	2.10596	0.225366	1.65792	0.181901	1.28293	0.0653413	1.04182	0.0538913	0.842472	0.0992231	0.75533	0.0111323	0.532785	0.075512	0.40499	0.0501437	0.610786	0.0851225	1.12571	0.197065	1.72864	0.293736	2.13156	0.122724	2.0656	0.0435636	1.63296
PMM0389	PMED4_04301	cobI/cbiL PRECORRIN-2 C20-METHYLTRANSFERASE	15.6511	0.0003125	20.8	0.88826	7	0.874085	2.0 Biosynthesis of cofactors, prosthetic groups, and carriers	2.3 Cobalamin, heme, phycobilin and porphyrin	1.05447	0.367559	0.470759	0.126244	0.763009	0.0769767	0.806693	0.0881708	1.17373	0.424769	1.54528	0.0769147	1.85915	0.362749	1.61745	0.21533	1.19349	0.274981	0.973605	0.171985	0.985766	0.225276	0.702671	0.109845	0.777852	0.126742	0.542446	0.0307758	0.817274	0.269059	0.937997	0.0393913	1.30898	0.0110435	1.65197	0.110939	1.74732	0.301372	1.54104
PMM0390	PMED4_04311	conserved hypothetical protein	14.6596	0.00459137	20.6	0.831962	8	0.608153	16.0 Hypothetical	16.1 Conserved hypothetical protein	0.722749	0.0813281	0.481801	0.0782731	0.594291	0.131592	0.529942	0.0912927	0.825057	0.420991	1.63159	0.157998	1.33953	0.389799	1.35977	0.166123	1.01211	0.113739	0.892208	0.253345	0.963559	0.11884	0.791754	0.104541	0.819931	0.0883031	0.486731	0.0591688	0.883791	0.319018	1.06927	0.115336	1.39746	0.55883	1.51518	0.0618358	1.55994	0.070377	1.24371
PMM0391	PMED4_04321	GTP-binding protein (HSR1-related)	15.7976	0.000364299	21.8	0.901829	9	0.553702	10.0 Regulatory functions	10.0 Regulatory functions	0.846422	0.0463881	0.634426	0.0592208	0.722179	0.17023	0.722792	0.0436576	1.0493	0.0707232	1.35039	0.113958	1.50262	0.227863	1.33492	0.0638265	1.22147	0.111857	1.07844	0.179671	0.937369	0.0999408	0.883304	0.0753096	0.805973	0.0449604	0.72265	0.01743	0.754958	0.0174504	1.0339	0.0495204	1.14702	0.111808	1.38391	0.0824278	1.48649	0.00966792	1.38464
PMM0392	PMED4_04331	possible cobalt transport protein	9.78575	0.183658	21.4	0.557407	18	1	14.0 Transport and binding proteins	14.0 Transport and binding proteins	1.04201	0.192973	0.940591	0.0605783	0.926624	0.212233	0.966124	0.224111	1.05375	0.175228	1.11779	0.173188	1.12401	0.00410974	1.09326	0.0508662	1.12676	0.119944	0.878139	0.00764746	1.08061	0.276369	0.908084	0.0244133	0.966848	0.042768	0.877255	0.0675102	0.942859	0.0877469	0.807531	0.0167039	1.01319	0.187201	1.1874	0.0106388	1.23066	0.176009	0.944106
PMM0393	PMED4_04341	conserved hypothetical protein	16.5889	0	17.8	0.949518	5	0.973395	16.0 Hypothetical	16.1 Conserved hypothetical protein	0.628949	0.0997933	0.626192	0.09917	1.00531	0.0708474	1.90392	0.397769	1.66669	1.51779	2.9961	0.417728	2.55156	0.381015	1.69166	0.0322203	1.03655	0.0769247	0.861401	0.125343	0.789638	0.157773	0.78032	0.0887751	0.646733	0.0230652	0.680949	0.0345076	1.60148	0.262686	2.3098	0.38979	2.55616	0.344416	2.59929	0.0782291	2.24074	0.219334	1.2923
PMM0394	PMED4_04351	conserved hypothetical protein	12.1428	0.0540359	20.6	0.688849	8	0.775663	16.0 Hypothetical	16.1 Conserved hypothetical protein	0.86501	0.119842	0.749504	0.00481198	0.84127	0.0892453	0.862623	0.0979732	0.943377	0.23102	1.12072	0.0189581	1.24328	0.113784	1.06227	0.0692178	0.969692	0.102923	0.863169	0.120272	1.06022	0.193403	0.957029	0.231797	0.99309	0.0385999	0.910953	0.0524734	0.879228	0.142827	1.24132	0.0558804	1.22884	0.135411	1.40456	0.138176	1.19327	0.0963467	1.12167
PMM0395	PMED4_04361	conserved hypothetical protein	17.0798	0	18.4	0.974308	5	0.785556	16.0 Hypothetical	16.1 Conserved hypothetical protein	0.445859	0.0576967	0.478419	0.00208818	1.04236	0.110563	2.22004	0.378259	2.77539	1.13897	4.0354	0.0319265	3.38394	0.179223	2.02248	0.420064	1.05555	0.176339	0.797768	0.0412487	0.649899	0.0501367	0.586549	0.0463154	0.416286	0.00493345	0.466078	0.014914	0.931624	0.136506	2.16862	0.198727	3.21799	0.420804	3.7894	0.181424	3.21083	0.161936	1.86921
PMM0396	PMED4_04371	proC Delta 1-pyrroline-5-carboxylate reductase	15.5367	0.000437956	18.6	0.885077	6	0.907623	1.0 Amino acid biosynthesis	1.4 Glutamate family / Nitrogen assimilation	0.989828	0.015915	0.518136	0.122871	0.877352	0.110153	1.20758	0.0990769	2.14667	0.389197	5.00963	0.240088	2.6375	0.603401	1.51603	0.214502	0.917291	0.110907	0.850239	0.011392	0.828963	0.213563	0.807079	0.150725	0.706216	0.111979	0.647429	0.0502227	0.763876	0.0231391	1.80908	0.076788	2.80796	0.580726	4.04808	0.215968	2.71252	0.397328	1.49113
PMM0397	PMED4_04381	possible Glycosyl transferase, group 1	15.8236	0.000373832	5.6	0.908578	15	0.756863	15.0 Other categories	15.7 Other	1.41972	0.157739	1.0546	0.171085	1.008	0.0910412	0.694249	0.135005	0.682973	0.101701	0.816253	0.0517307	0.857516	0.0355413	0.825775	0.0563373	0.965553	0.0314095	1.05389	0.0156409	1.24716	0.194304	1.36404	0.0519489	1.21957	0.0671456	1.19446	0.0110023	0.966666	0.0627005	0.828688	0.0811649	0.911184	0.0496554	0.772907	0.00981499	0.832059	0.0343915	0.859574
PMM0398	PMED4_04391	possible Recombination protein O (RecO)	13.0012	0.0257881	23.4	0.753197	9	0.564632	11.0 DNA replication, recombination, and repair	11.0 DNA replication, recombination, and repair	0.952131	0.0614279	0.734349	0.0543511	0.778406	0.0934125	0.958901	0.243895	0.92631	0.162622	0.973278	0.153398	1.27839	0.103077	1.08009	0.136202	1.08169	0.0211668	1.11233	0.0916207	1.12367	0.247178	1.02445	0.0851873	1.04022	0.00795572	0.839512	0.0656884	0.862505	0.100731	0.979638	0.0760759	1.02685	0.0472309	0.941573	0.0849561	1.06477	0.0106997	0.995701
PMM0399	PMED4_04401	Putative deoxyribose-phosphate aldolase	13.859	0.0117257	19.2	0.786828	6	0.568924	9.0 Purines, pyrimidines, nucleosides, and nucleotides	9.1 Interconversions and salvage of nucleosides and nucleotides	0.713397	0.058061	0.548702	0.159763	1.00324	0.274494	1.35758	0.730173	1.24395	0.0342419	1.39606	0.0146133	1.19928	0.243437	1.19746	0.0738696	0.925467	0.265693	0.95785	0.0218193	1.15309	0.154696	1.00556	0.183117	0.609715	0.231509	0.539037	0.232925	0.886046	0.187946	1.44398	0.306169	1.41579	0.256889	1.17206	0.003795	1.15728	0.307277	1.10276
PMM0400	PMED4_04411	lrtA light repressed protein A homolog	12.6919	0.0334733	17.8	0.726563	5	0.620259	15.0 Other categories	15.1 Adaptations and atypical conditions	0.587421	0.010314	0.71537	0.104548	0.968264	0.168114	1.18124	0.0261323	1.13971	0.247428	1.26725	0.0539223	0.963284	0.313514	0.958676	0.0744746	0.88262	0.19099	0.903876	0.104078	0.98399	0.0212604	0.929301	0.0676406	0.652142	0.0481799	0.665332	0.114398	1.18019	0.0543576	1.60026	0.175124	1.89913	0.174982	1.29206	0.0230201	1.12746	0.140066	1.06242
PMM0401	PMED4_04421	lipB putative lipoate-protein ligase B	14.5296	0.00551664	21.8	0.829953	9	0.502075	10.0 Regulatory functions	10.0 Regulatory functions	0.956158	0.0162343	0.731558	0.059057	0.808738	0.0896941	0.848852	0.127542	0.97631	0.0503796	1.01138	0.047438	1.30636	0.115962	1.16201	0.206391	1.05884	0.0175937	0.981386	0.0791218	0.951479	0.0584895	0.906914	0.0573999	0.902833	0.0508626	0.806518	0.064113	0.802992	5.60111e-05	0.940399	0.0962619	1.11783	0.109221	1.19376	0.011346	1.4075	0.182509	1.22037
PMM0402	PMED4_04431	fadD putative long-chain-fatty-acid--CoA ligase	7.57609	0.383561	10.8	0.436742	18	1	7.0 Fatty acid, phospholipid and sterol metabolism	7.0 Fatty acid, phospholipid and sterol metabolism	0.992895	0.0476396	1.05031	0.156746	1.15356	0.149304	0.823511	0.12086	0.822589	0.165974	0.872078	0.0814351	0.820729	0.140151	0.834782	0.0171219	0.821446	0.0433246	0.882649	0.0103541	1.04135	0.0715802	0.984465	0.194003	1.14129	0.260447	1.14079	0.317829	1.37977	0.0255936	1.38018	0.0768664	1.08839	0.0762924	1.08595	0.0558552	1.00042	0.00249918	0.9426
PMM0403	PMED4_04441	conserved hypothetical protein	16.3526	0.000342466	17	0.944678	5	0.966452	16.0 Hypothetical	16.1 Conserved hypothetical protein	0.54656	0.079695	0.792782	0.160866	1.54728	0.397012	2.10872	0.354805	1.91256	1.17794	2.30879	0.0601049	1.72884	0.241235	1.31443	0.0416523	0.952746	0.150568	0.8182	0.0236531	0.826111	0.0129135	0.759732	0.072284	0.696607	0.126456	0.708903	0.165442	1.62127	0.381876	2.40548	0.391375	2.3201	0.442629	1.98559	0.170097	1.65238	0.0707361	1.29864
PMM0404	PMED4_04451	hypothetical	9.56675	0.200169	11	0.551756	18	1	16.0 Hypothetical	16.2 No similarity	1.42389	0.173455	0.907425	0.0713392	1.1131	0.0806834	1.06084	0.145141	0.978809	0.216785	0.889239	0.303298	0.999256	0.201383	1.0015	0.322361	0.917501	0.125654	0.924148	0.107357	0.987731	0.254083	1.01023	0.0188238	1.12657	0.164539	1.01327	0.046146	1.24849	0.507993	1.01553	0.134317	1.04237	0.342777	0.923742	0.111498	0.864167	0.237206	0.784074
PMM0405	PMED4_04481	pdhC Dihydrolipoamide acetyltransferase component (E2)of pyruvate de	15.5864	0.000454545	21.8	0.889297	8	0.889087	14.0 Transport and binding proteins	14.0 Transport and binding proteins	0.762248	0.0308632	0.663286	0.0564577	0.66066	0.0889693	0.750278	0.100677	0.880587	0.161692	1.40785	0.0513377	1.33173	0.232352	1.2426	0.00575754	1.2068	0.00279627	1.01971	0.0304617	1.03591	0.0954017	0.890128	0.0109323	0.800203	0.0408561	0.741357	0.0673072	0.781457	0.0191321	0.969869	0.0273747	1.30251	0.181784	1.57368	0.099722	1.62535	0.0223672	1.51205
PMM0406	PMED4_04491	queA Queuosine biosynthesis protein	15.2539	0.000845411	21.4	0.868995	9	0.469253	15.0 Other categories	15.7 Other	1.01551	0.148693	0.704087	0.156628	0.753608	0.0749527	0.866115	0.0773573	1.05771	0.118387	1.38167	0.0505668	1.5217	0.454584	1.18314	0.182245	1.11799	0.158525	0.928885	0.0178655	1.08173	0.107085	0.914504	0.138886	0.784229	0.140053	0.627366	0.0923894	0.720706	0.0491363	0.829868	0.0116056	1.11739	0.0553079	1.33696	0.190018	1.51194	0.196256	1.23713
PMM0407	PMED4_04501	cysK1 O-acetylserine (thiol)-lyase A	17.2031	0	20.2	0.975378	7	0.938845	1.0 Amino acid biosynthesis	1.5 Serine family / Sulfur assimilation	0.465827	0.00504933	0.467539	0.0196956	0.720122	0.0107392	0.952695	0.0385112	1.19066	0.141437	1.63672	0.0389292	1.97417	0.146515	1.73607	0.108341	1.2342	0.135241	1.05291	0.0477643	0.78576	0.0443619	0.54541	0.0174214	0.512406	0.0636179	0.49397	0.0150099	0.789904	0.179056	1.21255	0.233438	1.55759	0.400983	1.82911	0.138183	2.18061	0.032123	1.99424
PMM0408	PMED4_04511	possible Cystathionine gamma-synthase	15.0679	0.00176406	2.6	0.886976	12	0.769599	13.0 Translation	13.5 Protein modification and translation factors	1.29848	0.100399	0.816006	0.077661	0.675239	0.118968	0.557851	0.0984773	0.648873	0.0592025	0.673788	0.0338173	1.00447	0.128539	1.15568	0.0412061	1.20723	0.0834646	1.19325	0.115107	1.19419	0.255377	1.37592	0.205642	0.99327	0.0129202	0.814092	0.0892732	0.809861	0.149889	0.69959	0.0846053	0.746687	0.206455	0.776689	0.113152	0.995075	0.00349971	1.25827
PMM0409	PMED4_04521	metB putative Cystathionine gamma-synthase	15.5918	0.000455927	3	0.916295	13	0.93397	1.0 Amino acid biosynthesis	1.2 Aspartate family	1.24651	0.173403	0.865668	0.199125	0.708124	0.196398	0.496508	0.326434	0.432034	0.00282181	0.601718	0.0686629	0.873098	0.334861	1.24625	0.132365	1.23895	0.318099	1.28425	0.201407	1.42901	0.118468	1.52556	0.482243	1.1175	0.385304	0.807512	0.287197	0.581967	0.0386383	0.459425	0.034164	0.444858	0.0287877	0.473188	0.00544166	0.904048	0.108159	1.18267
PMM0410	PMED4_04531	rpsD,rps4 30S ribosomal protein S4	14.9178	0.0032888	2.8	0.877146	13	0.974593	13.0 Translation	13.2 Ribosomal proteins	1.13864	0.148401	1.12238	0.243255	0.781863	0.178599	0.592221	0.0727637	0.378928	0.0387093	0.660713	0.0948276	1.02992	0.323279	1.27663	0.109747	1.25011	0.226621	1.22498	0.156856	1.39893	0.0306532	1.31652	0.294267	1.0606	0.294239	0.811751	0.167251	0.676543	0.0611891	0.437928	0.0251845	0.407818	0.0416062	0.546969	0.0385026	1.00491	0.0981688	1.19101
PMM0411	PMED4_04541	conserved hypothetical protein	15.7117	0.000333333	1.4	0.924834	11	0.94075	16.0 Hypothetical	16.1 Conserved hypothetical protein	1.14127	0.260054	0.78353	0.117405	0.709893	0.0731709	0.698945	0.00125846	0.603278	0.142944	0.902679	0.118798	1.07014	0.241064	1.35078	0.0373802	1.20697	0.152977	1.15015	0.0514311	1.35904	0.17951	1.20772	0.0569516	0.914948	0.411699	0.674293	0.164786	0.748384	0.00630347	0.747446	0.0278148	0.708553	0.141773	0.833727	0.229975	1.01873	0.166018	1.17287
PMM0412	PMED4_04551	conserved hypothetical protein	14.657	0.00457875	1	0.860506	11	0.833401	16.0 Hypothetical	16.1 Conserved hypothetical protein	1.27566	0.137318	0.700603	0.0510019	0.68854	0.152166	0.70122	0.0612798	0.640155	0.217304	0.947211	0.0830045	1.10971	0.276238	1.3507	0.188808	1.06911	0.112951	1.32401	0.0370163	1.26488	0.00152479	1.21541	0.216069	0.868368	0.223419	0.630947	0.226447	0.751124	0.00336379	0.792904	0.105046	0.821731	0.0350655	0.880876	0.0426853	1.16573	0.190959	1.20168
PMM0413	PMED4_04561	murE UDP-N-acetylmuramyl-tripeptide synthetase	13.2277	0.0211765	1.2	0.778054	11	0.396095	3.0 Cell envelope	3.2 Murein sacculus and peptidoglycan	1.0502	0.258436	0.920137	0.0916062	0.813258	0.0898461	0.854325	0.187386	0.894654	0.0817528	0.830878	0.031552	0.996255	0.00219686	1.05876	0.15869	1.07262	0.0805598	1.07347	0.162022	1.00308	0.178191	1.02506	0.0327116	1.02818	0.230069	0.857315	0.0454743	0.98307	0.201218	0.945767	0.121775	0.96897	0.102519	0.969218	0.0688825	1.07342	0.0335954	1.21589
PMM0414	PMED4_04571	putative short chain dehydrogenase	10.4827	0.1358	9.2	0.596132	17	1	10.0 Regulatory functions	10.0 Regulatory functions	1.25678	0.0921727	1.0277	0.0485629	1.05753	0.0437645	0.781615	0.0186777	0.848498	0.0271007	0.867875	0.128208	0.878699	0.0613909	0.95182	0.0171641	0.886048	0.141716	0.833823	0.0651728	0.973749	0.176905	0.939169	0.0299967	1.29105	0.0168298	1.34981	0.104974	1.34688	0.105879	1.1337	0.0344997	1.29496	0.060033	0.854464	0.0455143	0.932225	0.100416	0.989226
PMM0415	PMED4_04581	putative L-cysteine/cystine lyase	6.96778	0.443655	23.2	0.403339	18	1	10.0 Regulatory functions	10.0 Regulatory functions	1.10968	0.0400313	0.710979	0.137884	0.836706	0.0223772	0.744615	0.111901	0.955734	0.0785349	0.892716	0.0278898	1.28536	0.0926832	1.09292	0.0888272	0.856117	0.0899045	0.839932	0.232361	0.947976	0.249171	0.914997	0.107378	1.16682	0.0887146	0.958965	0.0365768	0.919214	0.231569	0.902353	0.0770349	1.06463	0.00166413	0.970638	0.0266913	1.33066	0.126829	1.22466
PMM0416	PMED4_04591	SAM (and some other nucleotide) bindingmotif	13.3128	0.0197744	19.6	0.755063	7	0.52705	12.0 Transcription	12.2 RNA synthesis, modification, and DNA transcription	0.865733	0.0360698	0.795417	0.142324	1.00346	0.217255	0.947413	0.107924	1.26672	0.184541	1.47538	0.0744202	2.2066	0.208331	1.70208	0.0969968	0.879095	0.0738412	0.802164	0.141605	0.838027	0.0688863	0.847943	0.0363712	0.948161	0.0911445	1.01097	0.0152394	0.958623	0.167803	0.952964	0.0646577	1.28606	0.439387	1.3116	0.413485	2.29612	0.393537	1.74963
PMM0417	PMED4_04611	hypothetical	8.37158	0.306308	13.6	0.493008	17	1	16.0 Hypothetical	16.2 No similarity	0.982078	0.20216	1.1096	0.126063	1.18977	0.0359984	1.04789	0.206087	0.985262	0.164597	1.17251	0.0485391	0.89249	0.142733	0.904103	0.110448	0.855786	0.253095	0.867336	0.106985	1.04668	0.0520423	1.02365	0.130119	1.08232	0.633322	0.987296	0.331305	1.02315	0.149775	1.24571	0.157175	1.03888	0.0540736	0.930828	0.0463665	1.01988	0.0923073	0.905129
PMM0418	PMED4_04621	NifU-like protein	16.1159	0.000507614	19.4	0.914147	6	0.725438	15.0 Other categories	15.7 Other	0.605444	0.0328086	0.524474	0.10708	0.56836	0.179271	0.773601	0.291876	0.819333	0.687617	1.73894	0.0112376	1.4997	0.386562	1.44139	0.0120706	1.07182	0.0643787	0.956128	0.0590088	0.903278	0.0136653	0.853483	0.0215628	0.668015	0.216108	0.618024	0.0734685	1.02961	0.0541386	1.42819	0.00948766	1.60971	0.0550111	1.74208	0.0361821	1.58168	0.149642	1.26214
PMM0419	PMED4_04631	mqo putative malate/quinone oxidoreductase	15.6843	0.000321027	20.8	0.890471	7	0.574006	10.0 Regulatory functions	10.0 Regulatory functions	0.979004	0.0948796	0.676586	0.037118	0.880673	0.0899316	0.852691	0.118256	0.985343	0.164189	1.38049	0.0505717	1.86911	0.125822	1.65461	0.0886905	1.20713	0.196471	1.03653	0.175968	0.91521	0.158061	0.816764	0.0584366	0.956108	0.0572416	0.743657	0.088844	0.919901	0.111768	0.970692	0.0379465	1.53739	0.00901172	1.56884	0.19553	2.0561	0.0491333	1.7996
PMM0420	PMED4_04641	lepA GTP-binding protein LepA	3.35662	0.821616	23.2	0.19416	17	1	4.0 Cellular processes	4.6 Protein and peptide secretion	1.1472	0.0279261	0.91611	0.0734802	0.866087	0.0689092	0.71916	0.0545775	0.776948	0.240913	0.971474	0.00103049	1.16185	0.206662	1.11889	0.0242381	0.954125	0.0586187	0.957805	0.105815	0.99035	0.0408458	0.954163	0.107375	1.32664	0.212373	1.04075	0.112927	1.04266	0.0564137	0.931922	0.0246122	1.20211	0.123905	0.992189	0.0410322	1.1477	0.130092	1.18475
PMM0421	PMED4_04651	putative ABC transporter, oligopeptides	15.8451	0.000377358	18.8	0.901352	6	0.931732	14.0 Transport and binding proteins	14.0 Transport and binding proteins	0.89923	0.207249	0.531298	0.00836457	0.852085	0.319466	1.59975	0.701845	2.58856	0.264553	3.2052	0.484589	2.97237	0.253254	1.70571	0.361714	0.937802	0.0273991	0.853238	0.032151	0.904918	0.137558	0.763256	0.0831824	0.733237	0.229267	0.586582	0.0212344	0.894901	0.0628987	1.57495	0.00962718	2.6645	0.469222	2.72475	0.0540026	2.4014	0.0333489	1.55343
PMM0422	PMED4_04661	tRNA/rRNA methyltransferase (SpoU)	11.2323	0.0922962	17.2	0.64744	6	0.33799	12.0 Transcription	12.2 RNA synthesis, modification, and DNA transcription	0.902112	0.0411399	0.844736	0.23632	0.933124	0.11813	0.899756	0.0965769	0.916053	0.183074	1.11805	0.170433	1.0091	0.125782	1.06912	0.0482789	0.843978	0.0948567	0.745592	0.0632754	0.907774	0.119038	0.87078	0.0564475	0.959011	0.0839445	0.98816	0.0486838	1.2014	0.0328355	1.31156	0.142976	1.23021	0.111276	1.10683	0.0353213	1.19353	0.0163916	1.13
PMM0423	PMED4_04681	conserved hypothetical protein	9.15891	0.234032	5	0.528118	18	1	16.0 Hypothetical	16.1 Conserved hypothetical protein	1.89428	0.575012	1.07394	0.2854	0.988605	0.0850851	0.623001	0.118727	0.517856	0.179174	0.86816	0.0581682	1.05124	0.122856	1.36957	0.135185	0.859338	0.293081	0.961567	0.0810846	1.17962	0.079854	1.08414	0.313992	1.4486	0.861192	1.09371	0.243712	1.01904	0.224156	0.97893	0.0941707	0.913883	0.458523	0.693191	0.10719	1.02665	0.146613	1.08676
PMM0424	PMED4_04691	conserved hypothetical protein	6.71312	0.472187	6.6	0.382465	18	1	16.0 Hypothetical	16.1 Conserved hypothetical protein	1.35296	0.609549	0.872133	0.0814158	0.954662	0.154421	0.731929	0.0931145	0.729877	0.180754	0.817011	0.0641625	0.960156	0.0970081	1.22082	0.127371	0.935926	0.00768051	0.868517	0.107002	1.09856	0.266693	1.11907	0.244145	1.37374	0.33695	1.1674	0.0664045	1.12509	0.0879467	0.943833	0.0795364	1.3117	0.308494	1.00862	0.120377	0.880678	0.0905326	1.04238
PMM0425	PMED4_04701	conserved hypothetical protein	0.565968	0.99581	8.4	0.0320975	18	1	16.0 Hypothetical	16.1 Conserved hypothetical protein	1.16424	0.195691	0.889808	0.0218595	0.934944	0.213216	0.79491	0.0532659	0.947389	0.263933	0.849715	0.0531314	1.17451	0.24233	1.00919	0.159604	0.945111	0.316292	0.82051	0.0885679	1.01183	0.247871	1.02893	0.0242423	1.19264	0.144569	0.991916	0.0212657	0.971974	0.234879	0.96933	0.161742	1.1026	0.295513	0.969751	0.149011	1.12988	0.220484	1.00312
PMM0426	PMED4_04731	Sun protein (Fmu protein)	12.148	0.0538979	2.4	0.715514	11	0.559007	13.0 Translation	13.4 Nucleoproteins	1.22933	0.00937641	0.803959	0.0642762	0.982287	0.0461834	0.681137	0.0783684	0.882868	0.214607	0.881897	0.0483385	1.03215	0.00363003	1.12506	0.213962	1.06493	0.135847	1.03439	0.207185	1.25498	0.209503	1.0795	0.157458	1.1776	0.302234	0.960783	0.0547524	1.00722	0.23365	0.865644	0.0455709	0.898004	0.129037	0.985569	0.0038513	1.10377	0.151273	1.10992
PMM0427	PMED4_04741	putative penicillin binding protein	14.3139	0.00692498	3.2	0.840247	12	0.913997	3.0 Cell envelope	3.2 Murein sacculus and peptidoglycan	1.19308	0.0626502	0.812165	0.0332925	0.830527	0.00829337	0.69687	0.0962465	0.753391	0.143689	0.818876	0.00355417	1.02664	0.1148	1.06953	0.230055	1.06908	0.0324739	1.11461	0.0860421	1.23554	0.394502	1.16322	0.0931043	1.04488	0.0662123	0.943359	0.0518986	0.977755	0.0944288	0.799824	0.0660991	0.876448	0.311514	0.806645	0.0325365	0.962101	0.00651899	0.967237
PMM0428	PMED4_04751	chlG chlorophyll synthase 33 kD subunit	16.2066	0.000539084	4.8	0.93819	16	0.918822	2.0 Biosynthesis of cofactors, prosthetic groups, and carriers	2.3 Cobalamin, heme, phycobilin and porphyrin	1.42538	0.136845	1.30994	0.171167	1.05806	0.163747	0.732204	0.350937	0.56711	0.0232284	0.630899	0.0936738	0.80882	0.185657	0.952129	0.0526976	1.06241	0.285216	1.30772	0.248327	1.50402	0.0553439	1.48543	0.287398	1.23274	0.145003	1.01773	0.332514	0.803893	0.0432812	0.610588	0.0845761	0.569211	0.0786826	0.532348	0.00743916	0.691933	0.12455	0.88093
PMM0429	PMED4_04761	conserved hypothetical protein	16.4914	0	5	0.951606	16	0.978952	16.0 Hypothetical	16.1 Conserved hypothetical protein	1.34227	0.164526	1.24332	0.275907	0.687157	0.209418	0.523827	0.000965092	0.312574	0.156619	0.522381	0.00781584	0.685004	0.236777	0.844459	0.198513	1.10414	0.219585	1.35759	0.151971	1.58438	0.0266676	1.76849	0.185468	1.34593	0.237097	1.11555	0.155722	0.962014	0.107866	0.720817	0.124365	0.509108	0.00210312	0.498017	0.018077	0.626436	0.124231	0.840053
PMM0430	PMED4_04771	hisF Imidazole glycerol phosphate synthase subunitHisF (cyclase)	14.0878	0.00874613	6	0.805194	16	0.762454	1.0 Amino acid biosynthesis	1.1 Aromatic amino acid family	1.80722	0.174841	1.18079	0.000461418	0.883879	0.269451	0.732935	0.15023	0.666423	0.330408	0.779363	0.0858822	1.0569	0.049647	1.0002	0.0567751	0.921629	0.0277631	1.04285	0.245605	1.22123	0.137188	1.35413	0.275921	1.17452	0.0886404	1.00888	0.126596	0.979721	0.0275701	0.827345	0.168844	0.709941	0.013377	0.756479	0.00874191	0.863856	0.00851169	0.785789
PMM0431	PMED4_04781	SAM (and some other nucleotide) bindingmotif	4.62898	0.699344	12	0.27007	18	1	2.0 Biosynthesis of cofactors, prosthetic groups, and carriers	2.6 Menaquinone and ubiquinone	1.38109	0.269705	0.853837	0.116554	0.882153	0.239155	0.908695	0.0675862	0.902458	0.383294	1.00522	0.0097644	1.08834	0.179801	0.9893	0.163552	1.02652	0.199254	0.876097	0.221963	0.95191	0.21069	1.1237	0.00548889	1.20136	0.148203	0.861862	0.0737958	1.08836	0.137122	1.03157	0.0429493	1.15657	0.115991	1.04524	0.136651	0.979005	0.0259372	0.881456
PMM0432	PMED4_04791	conserved hypothetical protein	1.08566	0.979755	4.2	0.0632195	18	1	16.0 Hypothetical	16.1 Conserved hypothetical protein	1.44802	0.105062	0.841768	0.257215	0.886827	0.12161	0.863067	0.0631522	0.922989	0.325355	0.849077	0.184762	0.961896	0.208339	1.05658	0.126079	0.941851	0.153374	1.02342	0.394919	0.907616	0.350796	0.99576	0.0636573	1.0453	0.0110876	0.832746	0.197527	0.893045	0.0118656	1.16884	0.10776	1.18454	0.0501465	1.03022	0.0722082	0.971071	0.287934	0.959336
PMM0433	PMED4_04801	BirA putative Biotin--acetyl-CoA-carboxylase ligase	14.2439	0.00744337	3.6	0.833538	12	0.77033	2.0 Biosynthesis of cofactors, prosthetic groups, and carriers	2.1 Biotin	1.1924	0.266967	0.821119	0.18302	0.668482	0.127315	0.553059	0.0297687	0.590047	0.160809	0.798682	0.157945	0.89798	0.0220273	1.08376	0.131587	0.971431	0.115379	1.12335	0.0861255	1.14868	0.035008	1.26245	0.245846	1.32843	0.20797	0.960863	0.0612178	0.857529	0.123326	0.855544	0.0181256	0.967443	0.20736	0.729322	0.0588164	0.952444	0.142694	1.09207
PMM0434	PMED4_04811	possible ABC transporter, ATP binding protein	13.9604	0.0105105	1.4	0.821817	11	0.978516	14.0 Transport and binding proteins	14.0 Transport and binding proteins	1.31845	0.0981735	0.828881	0.306559	0.650106	0.00259508	0.486702	0.0620342	0.50562	0.242278	0.954395	0.143481	1.232	0.281853	1.24934	0.153523	1.13587	0.310715	1.18434	0.203696	1.10616	0.159614	1.23385	0.278129	0.871717	0.297903	0.704024	0.229219	0.745996	0.0504894	0.641426	0.068984	0.801721	0.105449	0.82555	0.0941347	1.05056	0.206877	1.05106
PMM0435	PMED4_04821	ndhB putative NADH dehydrogenase (complex I) subunit(chain 2)	15.0787	0.00177187	1.8	0.888412	11	0.864588	8.0 Photosynthesis and respiration	8.4 NADH dehydrogenase	1.05314	0.0850328	0.855159	0.0959445	0.921763	0.403327	0.807156	0.287158	0.881098	0.208868	0.863384	0.0257435	1.17566	0.0364992	1.16552	0.0379754	1.09243	0.0449036	1.16111	0.11465	1.11046	0.0870754	1.05449	0.021636	0.970912	0.12515	0.847631	0.0642323	0.763534	0.113379	0.69823	0.0641569	0.724969	0.0924645	0.767947	0.0279817	0.955419	0.0956021	1.02537
PMM0436	PMED4_04831	topA Prokaryotic DNA topoisomerase	16.9775	0	19.8	0.962671	7	0.977813	11.0 DNA replication, recombination, and repair	11.0 DNA replication, recombination, and repair	0.796359	0.0105406	0.74032	0.114248	1.00894	0.319216	1.09107	0.344332	1.18462	0.0343436	1.37716	0.00145109	1.49001	0.190144	1.26937	0.0148063	1.0422	0.0528308	0.923938	0.0336535	0.904691	0.0522264	0.792731	0.0995345	0.742701	0.0538634	0.708276	0.0367321	0.88303	0.00697516	1.04557	0.0220345	1.24589	0.00508427	1.41818	0.0310009	1.51993	0.101923	1.36424
PMM0437	PMED4_04841	hypothetical	14.0961	0.00877329	22	0.806666	9	0.809005	16.0 Hypothetical	16.2 No similarity	0.903331	0.00786681	0.644165	0.151148	0.601834	0.280999	0.564397	0.00497827	0.587237	0.404	1.31424	0.0883598	1.39727	0.639234	1.24869	0.247974	1.22853	0.0762331	0.97773	0.0048029	1.06089	0.164433	1.0371	0.0570994	0.923685	0.101551	0.645132	0.136063	0.919448	0.200075	1.06833	0.0972332	1.09857	0.0414716	1.30352	0.137585	1.38683	0.187898	1.39154
PMM0438	PMED4_04851	conserved hypothetical protein	12.5862	0.036954	22	0.720234	9	0.802763	16.0 Hypothetical	16.1 Conserved hypothetical protein	1.04158	0.0580745	0.718397	0.165916	0.858738	0.0844799	0.797979	0.248938	0.872526	0.209678	0.990238	0.10792	1.14512	0.0676281	1.26769	0.201314	0.949153	0.0954026	0.970713	0.0389778	1.03494	0.206179	0.945377	0.108385	0.904848	0.074531	0.748651	0.117122	0.929851	0.0505706	1.02239	0.119577	1.15074	0.0546985	1.0719	0.0709857	1.20333	0.215655	1.15365
PMM0439	PMED4_04861	conserved hypothetical protein	9.53566	0.202196	23	0.550874	18	1	16.0 Hypothetical	16.1 Conserved hypothetical protein	0.991926	0.026238	0.740774	0.00582585	0.835723	0.160824	0.886894	0.156557	0.844995	0.207907	0.942211	0.042844	1.19906	0.0532329	1.07453	0.0988995	0.913462	0.00501672	0.981842	0.0348227	1.07751	0.156396	1.11535	0.0024285	0.860937	0.1024	0.920303	0.116657	0.923742	0.139351	0.879173	0.0853097	1.0134	0.0233961	0.928215	0.144699	1.1838	0.0628908	1.14148
PMM0440	PMED4_04871	conserved hypothetical protein	11.0459	0.102575	0	0.643302	18	1	16.0 Hypothetical	16.1 Conserved hypothetical protein	1.0996	0.0189535	0.686209	0.00559294	0.817087	0.0636358	0.759073	0.115162	0.859526	0.00490613	0.975638	0.0313933	1.11038	0.247371	1.035	0.00855127	0.990227	0.0792583	0.939971	0.171293	1.02975	0.279175	0.899869	0.0269066	0.908942	0.0801424	0.861513	0.0545686	0.990931	0.0154485	0.927128	0.0168223	1.03181	0.0160857	1.13265	0.130812	1.20036	0.182657	1.10517
PMM0441	PMED4_04881	Aldo/keto reductase family	6.62361	0.482046	1.4	0.389918	18	1	15.0 Other categories	15.7 Other	1.26769	0.0877156	0.803159	0.0732342	0.869411	0.132976	0.70682	0.184498	0.916022	0.117738	0.944031	0.0732576	1.01858	0.0405296	1.10249	0.135727	0.876544	0.0416651	0.939347	0.168185	1.13001	0.178132	0.990176	0.0195145	1.08939	0.192932	0.844416	0.104814	0.950706	0.149867	1.01671	0.0767885	1.05271	0.0944817	1.02443	0.14933	1.10871	0.051554	1.01287
PMM0442	PMED4_04891	ribE Putative Riboflavin synthase alpha chain	14.3755	0.0065272	3.6	0.841323	12	0.766141	2.0 Biosynthesis of cofactors, prosthetic groups, and carriers	2.10 Riboflavin	1.24611	0.10577	0.81597	0.150855	0.737841	0.0757296	0.614523	0.00716147	0.565162	0.109799	0.642206	0.0979878	0.90452	0.14395	1.07347	0.00621737	0.998965	0.035367	1.01445	0.195036	1.24836	0.0320625	1.05246	0.0635993	1.08436	0.367059	0.889296	0.194491	0.941923	0.0252705	0.776991	0.0357599	0.861941	0.0810393	0.66213	0.0269017	0.999991	0.00602868	1.05654
PMM0443	PMED4_04901	conserved hypothetical protein	15.9179	0.000412371	22.6	0.916003	9	0.957076	16.0 Hypothetical	16.1 Conserved hypothetical protein	0.938406	0.11027	0.606389	0.144003	0.543372	0.00630965	0.593512	0.159	0.656624	0.429182	1.14363	0.0101987	1.38024	0.30218	1.33342	0.196848	1.22405	0.00339998	1.15078	0.153702	1.04559	0.00573529	0.994155	0.0764648	0.738321	0.154514	0.627879	0.00287391	0.823305	0.0452019	0.872457	0.00624591	1.00132	0.280422	1.03346	0.0580846	1.24866	0.00655277	1.39733
PMM0444	PMED4_04911	ctaE Cytochrome c oxidase, subunit III	16.728	0	18	0.956817	5	0.99337	8.0 Photosynthesis and respiration	8.9 Respiratory terminal oxidases	0.411594	0.0792099	0.414108	0.0295084	1.23345	0.136493	2.19575	0.281944	2.60867	1.00382	3.31498	0.69881	2.29202	0.296957	1.58146	0.20802	0.99195	0.0211761	0.728982	0.0454313	0.550429	0.0426269	0.400953	0.0161825	0.279921	0.0207427	0.319242	0.0119676	1.04245	0.0717857	2.04522	0.0894054	2.83321	0.133064	2.73967	0.288684	1.88138	0.0172187	1.17806
PMM0445	PMED4_04921	ctaD (coxA) Cytochrome c oxidase, subunit I	16.713	0	18.2	0.954938	5	0.988959	8.0 Photosynthesis and respiration	8.9 Respiratory terminal oxidases	0.345477	0.108175	0.334052	0.0307882	1.18567	0.0531994	2.40461	0.121607	3.08766	0.278224	2.90935	0.461153	2.34869	0.3521	1.68483	0.312804	0.971746	0.0488042	0.707343	0.0233384	0.545789	0.0571065	0.38632	0.0245516	0.265052	0.00152867	0.329822	0.0195801	1.14343	0.049986	2.26581	0.0450503	2.82478	0.0258281	2.83675	0.419099	1.88027	0.0140688	1.28046
PMM0446	PMED4_04931	ctaC (coxB) putative cytochrome c oxidase, subunit 2	16.6917	0	18	0.955078	5	0.995328	8.0 Photosynthesis and respiration	8.9 Respiratory terminal oxidases	0.306827	0.108899	0.288168	0.042352	1.09489	0.147905	2.22641	0.220654	2.93085	0.825096	2.9249	0.221777	2.41952	0.197015	1.58747	0.084173	0.953945	0.0696569	0.665936	0.0739538	0.459879	0.0731963	0.375581	0.036103	0.280981	0.0280136	0.35029	0.036058	1.34596	0.116145	2.65176	0.0776281	3.28944	0.0276709	3.05783	0.337582	1.84229	0.195172	1.24339
PMM0447	PMED4_04941	conserved hypothetical protein	17.0792	0	17.4	0.982856	5	0.999326	16.0 Hypothetical	16.1 Conserved hypothetical protein	0.345072	0.0840393	0.50091	0.0162132	2.44314	0.273643	5.33463	0.0690282	7.83898	1.28359	8.86031	1.76858	5.92165	0.0301853	2.38016	0.339588	0.750377	0.0386567	0.554586	0.113002	0.437135	0.306428	0.25543	0.0325197	0.352326	0.0735942	0.437041	0.0887186	2.48356	0.424905	5.89712	0.216432	8.49504	1.64826	7.68792	0.600214	4.82266	0.180889	1.90124
PMM0448	PMED4_04951	ctaB putative protoheme IX farnesyltransferase	16.853	0	17.2	0.970811	5	0.999464	2.0 Biosynthesis of cofactors, prosthetic groups, and carriers	2.3 Cobalamin, heme, phycobilin and porphyrin	0.583981	0.191224	0.587564	0.0093487	2.24757	0.580679	4.83537	1.27506	5.94285	0.492172	5.91197	1.68458	3.77633	0.00843312	1.92331	0.252044	0.90362	0.116348	0.629513	0.0492036	0.614803	0.133073	0.423682	0.0202811	0.437871	0.0807148	0.516229	0.0579327	1.93484	0.0385626	3.96061	0.185605	5.93453	0.100886	5.60284	1.09865	3.11116	0.247795	1.46093
PMM0449	PMED4_04961	putative multidrug efflux ABC transporter	13.9597	0.0105026	19.8	0.791538	8	0.394756	14.0 Transport and binding proteins	14.0 Transport and binding proteins	0.713367	0.0575583	0.668655	0.110076	0.777534	0.195355	0.985577	0.00250327	1.10267	0.0326629	1.48668	0.128359	1.11129	0.34939	1.18489	0.0903701	0.971422	0.0571527	0.978233	0.217903	0.833786	0.0449724	0.90866	0.103253	0.830313	0.42625	0.751597	0.104704	0.920483	0.0497516	1.271	0.178934	1.3812	0.137198	1.34324	0.139624	1.35042	0.0659274	1.06783
PMM0450	PMED4_04971	putative multidrug efflux ABC transporter	16.0075	0.00044843	18.8	0.910752	6	0.924523	14.0 Transport and binding proteins	14.0 Transport and binding proteins	0.892128	0.0110565	0.520285	0.0124763	0.90647	0.135865	1.06136	0.0100877	1.56102	0.101497	1.64061	0.450596	1.46221	0.16533	1.33166	0.210128	1.0109	0.137666	0.791989	0.0752751	0.830481	0.160582	0.682189	0.0476233	0.675943	0.12342	0.563114	0.172018	0.946473	0.064005	1.31985	0.0262328	1.57252	0.118281	1.5339	0.192259	1.38267	0.0647175	1.19252
PMM0451	PMED4_04981	possible Arenavirus glycoprotein	15.1005	0.00156425	19.6	0.856458	7	0.602384	15.0 Other categories	15.7 Other	0.873419	0.0714233	0.561562	0.149435	0.719014	0.0999652	1.05123	0.2419	1.34868	0.0582497	2.02229	0.019024	1.7305	0.180369	1.34022	0.0782757	1.0385	0.0756175	0.974307	0.032439	0.928542	0.100918	0.906703	0.0253637	0.825136	0.0567717	0.702782	0.0530773	0.867291	0.0614351	1.30916	0.0390734	1.82901	0.306304	1.98284	0.628849	1.98968	0.254813	1.34808
PMM0452	PMED4_04991	groEL2,cpn60-2 GroEL2 protein (Chaperonin cpn60 2)	12.4455	0.0419504	22.6	0.715999	10	0.468885	4.0 Cellular processes	4.3 Chaperones	0.62428	0.116122	0.549132	0.0865903	0.562865	0.057933	0.606334	0.0589166	0.539846	0.0973344	0.92846	0.124352	1.15534	0.269757	1.19768	0.278379	1.18031	0.24442	1.14046	0.0361288	0.895561	0.0291167	0.687134	0.0755721	0.808794	0.176521	0.947539	0.120858	1.14481	0.330676	1.00265	0.178152	1.03235	0.319695	1.27977	0.219684	1.73747	0.275153	1.65075
PMM0453	PMED4_05011	fabG 3-oxoacyl-[acyl-carrier protein] reductase	16.9729	0	5.8	0.97305	16	0.996973	7.0 Fatty acid, phospholipid and sterol metabolism	7.0 Fatty acid, phospholipid and sterol metabolism	1.76956	0.150373	1.57357	0.0937472	0.967957	0.0416269	0.389368	0.00721696	0.172319	0.0635096	0.186696	0.0481854	0.32	0.115653	0.547867	0.0903242	0.886673	0.154701	1.36591	0.103736	1.69283	0.239471	2.08211	0.292238	1.73597	0.343245	1.44917	0.264894	0.96681	0.246303	0.47186	0.0368286	0.243491	0.0466838	0.248963	0.0292518	0.39347	0.0696053	0.624399
PMM0454	PMED4_05021	ispD putative 2-C-methyl-D-erythritol 4-phosphatecytidylyltransferase	15.1608	0.00149425	3.6	0.887422	13	0.808881	10.0 Regulatory functions	10.0 Regulatory functions	0.982917	0.0303506	1.00922	0.0114931	0.780271	0.129862	0.617781	0.0748513	0.592219	0.247681	0.711862	0.0725327	0.941597	0.0945898	1.10808	0.0266334	1.10843	0.000464121	1.04795	0.0819093	1.2359	0.0351248	1.25245	0.0832935	1.11345	0.0653221	0.933786	0.0716244	0.920592	0.0100988	0.728578	0.0271584	0.683352	0.0361132	0.764117	0.0404666	0.956903	0.0581462	0.968092
PMM0455	PMED4_05031	conserved hypothetical protein	11.4652	0.0799082	1.6	0.675242	11	0.792797	16.0 Hypothetical	16.1 Conserved hypothetical protein	1.25884	0.281099	0.782103	0.0433006	0.742658	0.177151	0.829073	0.344627	0.777854	0.260341	0.866362	0.105777	1.14917	0.0771654	1.16247	0.22431	1.01321	0.176923	0.982602	0.11983	1.03102	0.248877	0.92827	0.00344602	1.13202	0.0388443	0.885831	0.0635768	0.895323	0.0655628	0.740931	0.168348	0.826933	0.108251	0.860346	0.0541092	1.13048	0.0319392	1.03712
PMM0456	PMED4_05041	ubiA probable 4-hydroxybenzoate-octaprenyltransferase	8.79436	0.26592	15.2	0.515863	17	1	2.0 Biosynthesis of cofactors, prosthetic groups, and carriers	2.6 Menaquinone and ubiquinone	1.05771	0.148412	0.832688	0.0565379	1.02004	0.150225	0.983692	0.201048	1.07554	0.155699	1.11916	0.0130345	1.22658	0.0365729	1.04422	0.102631	0.8186	0.00814004	0.80055	0.110402	0.913433	0.283438	0.858013	0.00180225	1.16002	0.0103694	1.09321	0.0763087	1.11004	0.107891	1.06131	0.132425	1.34568	0.03847	0.971507	0.00779611	1.06126	0.0721469	0.879944
PMM0457	PMED4_05051	ppx putative exopolyphosphatase	16.7531	0	6	0.958578	16	0.852282	5.0 Central intermediary metabolism	5.1 Phosphorus compounds	1.25991	0.139563	1.06381	0.00614656	0.943016	0.012767	0.562377	0.0825359	0.611374	0.123406	0.528103	0.0885251	0.593903	0.05563	0.744089	0.0245974	0.977544	0.0470131	1.0474	0.0415593	1.23645	0.0123037	1.4816	0.305265	1.38951	0.181522	1.15716	0.10085	1.02577	0.0325336	0.788668	0.10391	0.685666	0.0466563	0.629975	0.04954	0.690957	0.0322158	0.718735
PMM0458	PMED4_05061	conserved hypothetical protein	16.0402	0.000464037	19.8	0.909544	7	0.78945	16.0 Hypothetical	16.1 Conserved hypothetical protein	0.909375	0.0137964	0.580765	0.0230158	0.697017	0.0380975	0.932803	0.0331452	1.1507	0.302401	2.4123	0.359698	1.62981	0.780024	1.59452	0.25179	1.25042	0.043036	0.980308	0.125447	0.858094	0.239513	0.688727	0.0109176	0.685957	0.0556476	0.624812	0.0140956	0.870816	0.0331111	1.70928	0.161096	1.92479	0.62071	2.12324	0.398507	2.3526	0.196949	1.63404
PMM0459	PMED4_05071	cobM PUTATIVE PRECORRIN-4 C11-METHYLTRANSFERASE	9.61138	0.196854	21.2	0.546844	17	1	2.0 Biosynthesis of cofactors, prosthetic groups, and carriers	2.3 Cobalamin, heme, phycobilin and porphyrin	0.898305	0.13795	0.809276	0.144035	0.784874	0.0863898	0.797287	0.0837716	0.813059	0.290225	1.05842	0.0431579	1.05799	0.133482	0.95619	0.0754278	0.884036	0.0885714	0.896268	0.0267054	0.912781	0.0321052	0.902869	0.183023	1.09451	0.000893937	0.956606	0.131781	0.926988	0.0987364	0.997177	0.0526765	1.07709	0.138798	1.1356	0.100852	1.25501	0.14889	1.19509
PMM0460	PMED4_05081	yvoC, lgt, umpA putative prolipoprotein diacylglyceryltransferase	10.1778	0.155857	10.2	0.58318	17	1	3.0 Cell envelope	3.1 Membranes, lipoproteins and porins	1.18685	0.152415	1.08321	0.10912	0.932139	0.0115004	1.15956	0.533058	1.07564	0.134456	1.12141	0.122184	0.966689	0.0988508	0.90627	0.037353	0.848655	0.0374454	0.914968	0.0312686	1.04235	0.039699	1.2098	0.13604	1.17089	0.272223	1.14543	0.128996	1.13781	0.0296045	1.12304	0.000313494	0.960944	0.0768337	0.901097	0.0722002	0.928357	0.125571	0.81842
PMM0461	PMED4_05091	petA Cytochrome f	16.0143	0.00045045	12.8	0.939039	3	0.999935	8.0 Photosynthesis and respiration	8.3 Cytochrome b6/f complex	1.24118	0.0296597	1.41652	0.000356301	1.2941	0.0287016	1.24104	0.129139	1.18119	0.223859	1.12148	0.0735002	0.90546	0.0826889	0.758591	0.0616327	0.762434	0.0197954	0.81975	0.0321028	0.859862	0.0539347	0.936487	0.00836462	1.10122	0.0587509	1.15193	0.0487327	1.25399	0.0182022	1.2532	0.0264476	1.27381	0.0467181	1.12342	0.0897295	0.828076	0.0210248	0.694491
PMM0462	PMED4_05101	petC Rieske iron-sulfur protein	15.8266	0.000374532	12.2	0.924836	3	0.99997	8.0 Photosynthesis and respiration	8.3 Cytochrome b6/f complex	1.31358	0.0675639	1.40513	0.0907326	1.23989	0.161591	1.20813	0.27648	1.00221	0.416704	1.09354	0.167676	0.972287	0.0635183	0.860387	0.000840367	0.777008	0.0457036	0.860047	0.0383563	0.935348	0.00499999	1.11729	0.00109101	1.20393	0.180277	1.21077	0.113904	1.3335	0.0104215	1.27903	0.166167	1.20759	0.0365131	1.0442	0.115139	0.805386	0.0456259	0.682127
PMM0463	PMED4_05111	conserved hypothetical protein	16.1452	0.000515464	21	0.916904	8	0.827223	16.0 Hypothetical	16.1 Conserved hypothetical protein	0.714873	0.0672625	0.555011	0.185959	0.683153	0.129882	0.693177	0.00922938	0.767446	0.33261	1.25357	0.0345413	1.47284	0.427816	1.28551	0.0209562	1.06287	0.0329383	1.02969	0.0579012	0.897676	0.0689681	0.820535	0.0123456	0.62985	0.124736	0.760247	0.0438244	0.880245	0.0125308	1.12649	0.136757	1.22285	0.0911234	1.3958	0.0838982	1.54173	0.335776	1.64301
PMM0464	PMED4_05121	protein secretion component, Tat family	6.77062	0.466001	10.2	0.387991	17	1	4.0 Cellular processes	4.2 Cell killing	1.20188	0.299339	1.01864	0.0116012	0.951592	0.0741109	1.01167	0.0412447	1.11255	0.124855	0.980959	0.115119	0.978291	0.00327675	0.949191	0.0332336	0.964907	0.056229	0.988618	0.0016554	1.05116	0.0176055	1.03492	0.0643359	1.04347	0.00873756	1.0002	0.0999141	1.0425	0.0357728	0.982277	0.0182619	1.11607	0.0972534	0.90376	0.0102672	0.878262	0.16104	0.798673
PMM0465	PMED4_05131	hypothetical	14.4451	0.00613288	11.2	0.836084	3	0.819087	16.0 Hypothetical	16.2 No similarity	1.15205	0.217741	1.15455	0.189853	0.946039	0.121596	0.997074	0.198349	0.896485	0.234584	1.00027	0.0128436	0.824044	0.128261	0.772891	0.00012977	0.793934	0.0831736	0.87369	0.0304683	1.01498	0.0993938	1.06655	0.0589599	1.1895	0.192112	1.27823	0.130707	1.35743	0.00249988	1.38986	0.131964	1.25278	0.010105	0.946002	0.153297	0.764547	0.0578721	0.768632
PMM0466	PMED4_05141	possible secreted protein MPB70 precursor	11.8985	0.0627757	1	0.699243	10	0.831266	15.0 Other categories	15.7 Other	0.899904	0.128347	0.795186	0.0980294	0.844258	0.0153187	0.67057	0.0562124	0.691279	0.171725	0.910121	0.145203	0.992124	0.334545	1.16251	0.0413199	0.966038	0.00401783	0.942868	0.0107117	1.13586	0.121008	1.00624	0.0164317	0.999276	0.0594349	0.924168	0.192729	1.07092	0.0477606	0.932614	0.0990142	0.901095	0.0985095	0.945477	0.0195574	1.1959	0.189574	1.27881
PMM0467	PMED4_05151	gmk Guanylate kinase	14.8869	0.00344478	17	0.859873	5	0.718842	15.0 Other categories	15.7 Other	0.978038	0.143733	0.850195	0.146966	1.18314	0.133651	1.18197	0.200095	1.1716	0.203736	1.28087	0.0257437	1.10632	0.101561	0.984507	0.00329758	0.770053	0.162704	0.858114	0.0470349	0.997218	0.0657469	0.881703	0.182622	0.861087	0.111176	0.779688	0.133905	1.10362	0.133974	1.38248	0.0914667	1.41568	0.542904	1.45502	0.283328	1.25051	0.141463	1.1232
PMM0468	PMED4_05161	psaJ Photosystem I PsaJ protein (subunit IX)	16.6583	0	8.6	0.945391	1	0.98908	8.0 Photosynthesis and respiration	8.5 Photosystem I	1.38891	0.0675919	1.38358	0.0969736	1.32672	0.0667543	1.07329	0.184857	0.935655	0.0983625	0.728827	0.0619136	0.637548	0.0120219	0.648213	0.0113453	0.811236	0.00863905	0.946876	0.0511246	1.04397	0.095134	1.1519	0.0765586	1.15932	0.0312334	1.27693	0.0586077	1.25284	0.0170127	1.02465	0.0307945	0.814605	0.0468894	0.717445	0.0670609	0.604504	0.0512172	0.64781
PMM0469	PMED4_05171	psaF Photosystem I PsaF protein (subunit III)	16.8564	0	8	0.955734	1	0.995564	8.0 Photosynthesis and respiration	8.5 Photosystem I	1.28352	0.086362	1.35255	0.19035	1.19478	0.175832	1.00615	0.177476	0.852098	0.198881	0.643305	0.016438	0.584298	0.106328	0.631485	0.0960775	0.806686	0.0477274	0.959209	0.259072	1.08772	0.00366974	1.22763	0.0844902	1.23644	0.138929	1.34738	0.157884	1.2936	0.156598	0.98991	0.0102631	0.743721	0.0420769	0.566898	0.0346976	0.547411	0.0470239	0.684634
PMM0470	PMED4_05181	probable o-sialoglycoprotein endopeptidase	15.3196	0.000882724	21	0.87077	8	0.945242	15.0 Other categories	15.7 Other	0.623162	0.0590623	0.530666	0.142074	0.730593	0.208016	0.7772	0.322497	0.974527	0.0402548	1.41688	0.0578933	1.24576	0.393001	1.50177	0.0526962	1.10177	0.0512619	0.96996	0.0391848	0.96886	0.178934	0.818294	0.0986437	0.761771	0.00531041	0.713553	0.183825	0.876931	0.0381595	1.14075	0.167564	1.22426	0.21354	1.475	0.1978	1.66135	0.163484	1.62673
PMM0471	PMED4_05191	hli20 possible high light inducible protein	15.7963	0.000363636	16.6	0.91613	5	0.688026	15.0 Other categories	15.1 Adaptations and atypical conditions	0.811791	0.078218	0.83156	0.150502	1.8263	0.476685	2.3902	0.128989	2.48899	0.153682	2.51874	0.138602	1.36257	0.0518766	1.31906	0.0799308	0.860341	0.0314449	0.849375	0.154917	0.958519	0.0437932	0.790837	0.0561607	0.708016	0.211409	0.72322	0.118503	1.59264	0.246873	2.52147	1.0884	2.38336	0.770033	1.74619	0.289926	1.44953	0.0454881	1.05821
PMM0472	PMED4_05201	putative Na+/H+ antiporter, CPA1 family	14.7468	0.00419048	18.2	0.842086	6	0.515627	14.0 Transport and binding proteins	14.0 Transport and binding proteins	0.966694	0.26693	0.817254	0.0622512	0.928169	0.0931888	1.22672	0.11737	1.50346	0.0715905	1.54038	0.221091	1.51595	0.00203071	1.12608	0.0443677	1.00271	0.145455	0.899618	0.101237	0.953684	0.0930154	0.95125	0.0633291	0.99827	0.0270608	0.790164	0.0162343	0.950968	0.101003	1.08954	0.0959047	1.29304	0.098021	1.38552	0.0194148	1.35259	0.0834014	1.03785
PMM0473	PMED4_05211	gltX Glutamyl-tRNA synthetase	14.425	0.00626058	4.2	0.839959	15	0.469923	13.0 Translation	13.1 Aminoacyl tRNA synthetases and tRNA modification	1.5634	0.198293	1.0127	0.129896	0.784134	0.128131	0.548947	0.0908101	0.454592	0.222766	0.742736	0.0377775	0.898902	0.128626	0.981771	0.175756	1.07082	0.0496158	1.08196	0.108102	1.19717	0.112705	1.17971	0.0952444	1.13667	0.0563184	0.980572	0.0483475	0.856141	0.0811741	0.74973	0.0320335	0.72777	0.0342067	0.764344	0.0167939	0.934926	0.019721	0.937964
PMM0474	PMED4_05221	Conserved hypothetical protein	9.84546	0.180104	5.2	0.567672	17	1	16.0 Hypothetical	16.1 Conserved hypothetical protein	1.5601	0.471083	1.18401	0.153488	0.969486	0.128693	0.865048	0.0528799	0.669347	0.232931	0.728821	0.199539	1.24814	0.0992196	1.22349	0.145548	1.09418	0.0803861	1.17243	0.0254303	0.988294	0.0301995	1.08504	0.0739073	1.22741	0.122508	1.15461	0.086977	0.995556	0.107841	0.696607	0.124933	0.807468	0.0683229	0.737817	0.0932804	0.853002	0.161917	0.839134
PMM0475	PMED4_05231	rpl19 Ribosomal protein L19	15.3623	0.000913838	3.6	0.897964	13	0.999508	13.0 Translation	13.2 Ribosomal proteins	1.23184	0.313462	0.980846	0.0352048	0.626927	0.174452	0.472361	0.100101	0.340924	0.161216	0.588835	0.0552132	0.918145	0.103102	1.14581	0.184485	1.13773	0.0463512	1.1844	0.0402118	1.11807	0.148448	1.1495	0.0231518	1.1067	0.183685	0.998691	0.0940656	0.838682	0.0824822	0.602062	0.0589324	0.505955	0.135097	0.543181	0.120664	0.812523	0.077592	1.03735
PMM0476	PMED4_05241	conserved hypothetical protein	14.4641	0.0059126	20	0.82013	7	0.636552	16.0 Hypothetical	16.1 Conserved hypothetical protein	0.884141	0.076088	0.60733	0.132139	0.886202	0.164056	1.02639	0.181262	0.959229	0.230892	1.29021	0.0428488	1.26003	0.261518	1.31158	0.0307925	0.913056	0.117511	0.896326	0.0304064	0.992587	0.0109024	0.791072	0.0711992	0.795346	0.270069	0.630911	0.101232	0.89187	0.0543567	1.20551	0.0349342	1.24288	0.246998	1.05227	0.0119546	1.1847	0.208357	1.08494
PMM0477	PMED4_05251	map putative methionine aminopeptidase	13.3321	0.0196536	17.6	0.765761	6	0.492915	13.0 Translation	13.5 Protein modification and translation factors	0.71609	0.0661396	0.78945	0.0027433	0.9759	0.292734	0.889971	0.161685	1.09601	0.117473	1.16314	0.0895112	1.21999	0.0114589	1.02771	0.0557201	0.744584	0.0420772	0.684391	0.0194888	0.707297	0.0218006	0.717958	0.0054507	0.976343	0.0958015	0.987847	0.0601515	1.04508	0.0242727	1.20305	0.162725	1.30994	0.346041	1.39515	0.200721	1.46992	0.0958215	1.17465
PMM0478	PMED4_05261	conserved hypothetical protein	15.6777	0.000318471	4.6	0.908561	16	0.782626	16.0 Hypothetical	16.1 Conserved hypothetical protein	1.54837	0.418082	1.11422	0.177765	0.840207	0.153197	0.558768	0.0484947	0.502601	0.125339	0.567196	0.015423	0.908761	0.0499828	1.04579	0.0993241	1.15001	0.00539264	1.28302	0.0815722	1.2766	0.00894373	1.45028	0.0215372	1.36679	0.224597	1.19315	0.143453	0.893228	0.00332797	0.654039	0.015337	0.565994	0.0412957	0.515928	0.0360747	0.82221	0.0736321	0.904824
PMM0479	PMED4_05271	conserved hypothetical protein	16.5087	0	17.2	0.951792	5	0.998588	16.0 Hypothetical	16.1 Conserved hypothetical protein	0.7779	0.0468217	0.767871	0.134725	1.44834	0.173315	1.7808	0.166146	1.74296	0.421918	2.28501	0.118303	1.51466	0.23859	1.22517	0.109867	0.882129	0.122495	0.740086	0.00243256	0.755644	0.0417885	0.654887	0.0569609	0.683584	0.0934949	0.69247	0.146679	1.48723	0.0562294	2.19006	0.131505	2.53078	0.185979	2.31217	0.0479729	1.77518	0.203716	1.16931
PMM0480	PMED4_05281	conserved hypothetical protein	16.9739	0	17.6	0.9739	5	0.998541	16.0 Hypothetical	16.1 Conserved hypothetical protein	0.72025	0.0668615	0.566566	0.0466811	1.47441	0.423723	2.02241	0.304069	2.28491	0.287422	2.46969	0.37569	2.16192	0.26635	1.51603	0.00277975	0.968036	0.0421016	0.681067	0.064035	0.583224	0.0776152	0.459664	0.0176298	0.524797	0.0110572	0.61439	0.0562611	1.36807	0.13266	2.08062	0.100553	2.30453	0.295046	2.21882	0.107581	1.76018	0.00848161	1.29244
PMM0481	PMED4_05291	conserved hypothetical protein	11.6079	0.0748434	9.4	0.661233	2	0.775618	16.0 Hypothetical	16.1 Conserved hypothetical protein	0.99541	0.191275	1.22441	0.264336	0.925888	0.245276	0.680647	0.0721938	0.497169	0.396536	0.888598	0.0177325	0.767053	0.260665	0.696533	0.157975	0.736101	0.13099	0.851626	0.0302444	1.14184	0.229383	1.22009	0.198258	1.26212	0.283777	1.35827	0.207898	1.47917	0.20818	1.25564	0.0789003	1.00208	0.0997874	0.990447	0.02457	0.842489	0.222658	0.909771
PMM0482	PMED4_05311	phb Band 7 protein	16.7254	0	15.4	0.98049	4	0.991489	15.0 Other categories	15.7 Other	0.964488	0.0491352	1.45175	0.0322999	2.03941	0.122841	2.32059	0.0889034	2.30926	0.164444	2.20773	0.317251	1.6418	0.186839	0.942731	0.00789398	0.520248	0.0556881	0.538679	0.026961	0.573029	0.055857	0.595655	0.0415158	0.832571	0.0775995	1.12536	0.129336	1.73892	0.156411	2.04756	0.0776402	2.20547	0.28846	1.96746	0.102433	1.64719	0.0228977	0.889971
PMM0483	PMED4_05321	hemL, gsa glutamate-1-semialdehyde 2,1-aminomutase	15.492	0.000702247	22.8	0.892703	9	0.918937	2.0 Biosynthesis of cofactors, prosthetic groups, and carriers	2.3 Cobalamin, heme, phycobilin and porphyrin	1.09353	0.00262524	0.78982	0.061711	0.81958	0.109443	0.779505	0.225787	0.878708	0.121529	1.17861	0.0111528	1.83035	0.125827	1.60153	0.13778	1.52773	0.166606	1.25815	0.129823	1.03898	0.0796933	0.858573	0.0323642	0.877547	0.105546	0.73202	0.1163	0.794573	0.0892368	0.716051	0.0311337	0.880071	0.382902	1.25474	0.14907	1.92247	0.229621	1.59541
PMM0484	PMED4_05331	xthA exodeoxyribonuclease III	11.9832	0.0598141	1.8	0.706016	11	0.592455	11.0 DNA replication, recombination, and repair	11.0 DNA replication, recombination, and repair	1.08181	0.107824	0.862752	0.293245	0.761065	0.125408	0.609692	0.0823299	0.539831	0.335873	0.882628	0.0290784	0.985855	0.320623	1.10272	0.116919	1.04191	0.256365	1.0851	0.0328392	1.11553	0.00731725	1.17378	0.147619	1.00913	0.292207	0.908468	0.0966807	0.984222	0.202191	0.924384	0.0920289	0.845023	0.0335532	0.890537	0.0637149	1.11577	0.141709	1.15475
PMM0485	PMED4_05341	conserved hypothetical protein	10.2136	0.153152	1.6	0.601388	17	1	16.0 Hypothetical	16.1 Conserved hypothetical protein	1.02631	0.323887	0.752407	0.128259	0.50931	0.0821771	0.421846	0.195531	0.507865	0.338617	0.83083	0.188582	0.979518	0.166862	1.10952	0.136106	0.966584	0.0524328	0.956818	0.0972092	1.05174	0.074924	0.988364	0.144802	1.0681	0.338964	1.07946	0.0726654	0.940975	0.109246	0.971279	0.0397199	1.08804	0.132535	1.00816	0.015844	1.01589	0.0715452	1.13767
PMM0486	PMED4_05351	conserved hypothetical protein	11.632	0.0742408	1.6	0.685119	10	0.478271	16.0 Hypothetical	16.1 Conserved hypothetical protein	1.24739	0.490711	0.66975	0.166953	0.450012	0.155906	0.397929	0.0925846	0.375188	0.389328	0.848602	0.00981821	0.849658	0.283026	1.10969	0.00717041	1.04205	0.0227187	1.12421	0.0583415	1.14599	0.0583662	0.968204	0.0315464	1.03665	0.287425	1.00015	0.317401	0.85526	0.0288579	1.00257	0.188569	1.01818	0.115153	1.02412	0.0530476	0.993887	0.0990184	1.18223
PMM0487	PMED4_05361	conserved hypothetical protein	15.7156	0.000335008	3	0.923271	13	0.823511	16.0 Hypothetical	16.1 Conserved hypothetical protein	1.19142	0.043165	0.85174	0.12195	0.754703	0.0791169	0.682377	0.110138	0.525065	0.12182	0.672845	0.0191695	0.852372	0.0520598	1.09115	0.0872639	1.01529	0.0161471	1.20324	0.0363831	1.17887	0.158322	1.16508	0.126612	1.01161	0.121875	0.915406	0.109713	0.794108	0.147094	0.652593	0.0173292	0.707466	0.00743375	0.695827	0.0556127	0.914198	0.149938	1.12517
PMM0488	PMED4_05371	conserved hypothetical protein	10.6007	0.129776	1.4	0.623938	18	1	16.0 Hypothetical	16.1 Conserved hypothetical protein	1.20851	0.185527	0.91324	0.187149	0.875134	0.0953139	0.874849	0.210835	0.832257	0.0753907	0.950305	0.04199	1.13412	0.162507	0.971057	0.0184801	1.10825	0.0355211	0.921546	0.0854333	1.17864	0.309437	1.01333	0.158248	1.04863	0.0472138	0.824658	0.122853	0.993595	0.371977	0.976381	0.117797	0.922661	0.186517	0.816471	0.021483	1.11017	0.10937	1.09025
PMM0489	PMED4_05381	futB,hitB putative iron ABC transporter	14.9175	0.00328542	18	0.852754	6	0.871469	14.0 Transport and binding proteins	14.0 Transport and binding proteins	0.973419	0.0110588	0.729629	0.159845	1.05185	0.318616	1.3981	0.88661	1.51959	0.278896	1.80494	0.236175	1.5072	0.0949179	1.07201	0.00385999	0.859451	0.164705	0.85133	0.00430119	0.935779	0.0884552	0.902976	0.130603	0.780688	0.105067	0.736589	0.154884	1.05571	0.026613	1.70205	0.258103	1.7127	0.077101	1.86819	0.374703	1.49599	0.290985	1.18966
PMM0490	PMED4_05391	conserved hypothetical protein	15.304	0.000872818	17	0.883135	5	0.928603	16.0 Hypothetical	16.1 Conserved hypothetical protein	0.967575	0.0579742	0.843761	0.111604	1.32831	0.178931	1.36304	0.27143	1.18626	0.61486	1.47154	0.189548	1.45826	0.00706214	1.00242	0.0397732	0.925694	0.0105681	0.913811	0.0745036	1.03714	0.0997887	0.735255	0.0492929	0.770311	0.129545	0.753056	0.101356	1.30781	0.0189282	1.58157	0.0676916	1.53361	0.245694	1.30183	0.0583567	1.40156	0.291422	1.11392
PMM0491	PMED4_05401	4a-hydroxytetrahydrobiopterin dehydratase (PCD)	12.1825	0.0527057	16.6	0.706099	5	0.587178	2.0 Biosynthesis of cofactors, prosthetic groups, and carriers	2.13 Others	0.737041	0.106785	0.653777	0.11041	1.1466	0.0568036	1.1839	0.0218695	0.819937	0.551567	1.22504	0.131286	0.930202	0.340335	1.01233	0.00665133	0.755315	0.133206	0.854647	0.0175652	0.946132	0.0658751	0.939488	0.0289554	0.71468	0.23914	0.766883	0.305745	1.57211	0.204684	1.71631	0.018975	1.53671	0.256073	1.23981	0.0830955	1.07732	0.137011	1.07753
PMM0492	PMED4_05411	conserved hypothetical protein	12.5191	0.0393357	1.6	0.737289	10	0.552891	16.0 Hypothetical	16.1 Conserved hypothetical protein	0.884983	0.30282	0.651509	0.39552	0.671436	0.086353	0.530916	0.174041	0.48671	0.342063	0.900582	0.00311706	0.874638	0.149681	1.04167	0.25022	0.981197	0.346928	1.00748	0.0363657	1.30781	0.0926165	1.09186	0.247323	0.98793	0.502126	0.775547	0.345549	0.975943	0.052442	1.09101	0.0352808	0.904876	0.206031	0.807462	0.19342	1.03144	0.209656	1.12193
PMM0493	PMED4_05421	cxp Carboxypeptidase Taq (M32) metallopeptidase	14.1493	0.00849057	19.6	0.802458	8	0.479283	15.0 Other categories	15.7 Other	0.829145	0.0471579	0.703915	0.106064	0.807695	0.0481527	0.944056	0.069131	1.03733	0.0452479	1.06937	0.0440449	1.11707	0.0976537	1.14429	0.0353339	0.952572	0.018055	0.963653	0.0041691	0.853099	0.0704841	0.820646	0.0906626	0.941952	0.0397974	0.910926	0.113069	1.07017	0.0510786	1.05507	0.00768563	1.19215	0.0302856	1.2163	0.117603	1.09842	0.0575866	1.18156
PMM0494	PMED4_05431	ppa (ipyR) putative inorganic pyrophosphatase	16.8814	0	5.8	0.966673	16	0.996944	5.0 Central intermediary metabolism	5.1 Phosphorus compounds	1.77055	0.263366	1.66271	0.00306326	0.973618	0.224154	0.645775	0.0779332	0.343859	0.248227	0.400541	0.019196	0.553306	0.0435887	0.741013	0.0447581	0.993436	0.199996	1.44787	0.163463	1.79196	0.00895317	1.95396	0.102823	1.68601	0.143085	1.21496	0.304335	0.86656	0.10585	0.612855	0.0514945	0.392388	0.0423331	0.329111	0.00746	0.489664	0.0604615	0.682158
PMM0495	PMED4_05441	hemC Porphobilinogen deaminase	16.2824	0.0003003	5.2	0.938331	16	0.970001	2.0 Biosynthesis of cofactors, prosthetic groups, and carriers	2.3 Cobalamin, heme, phycobilin and porphyrin	1.60821	0.0234525	1.21869	0.354754	0.894798	0.0151177	0.590142	0.026705	0.495082	0.11075	0.7132	0.0296378	0.800706	0.0677559	0.881715	0.0594992	1.01793	0.165304	1.15131	0.0933006	1.45994	0.0614226	1.47845	0.200991	1.3661	0.286417	1.1556	0.232313	0.949363	0.0256522	0.724893	0.0594948	0.53079	0.143146	0.607545	0.145718	0.812509	0.260898	0.859023
PMM0496	PMED4_05451	sigA, rpoD Putative principal RNA polymerase sigma factor	14.9564	0.00273684	23.6	0.868972	10	0.4502	12.0 Transcription	12.2 RNA synthesis, modification, and DNA transcription	0.738342	0.201102	0.635459	0.136205	0.541675	0.166609	0.401817	0.179343	0.468506	0.0328377	1.11011	0.177427	1.84607	0.80906	2.02072	0.0874098	1.49768	0.253892	1.24575	0.181345	1.1559	0.106826	1.02403	0.297447	0.833466	0.299164	0.63922	0.149745	0.530418	0.0532471	0.466164	0.0601536	0.760618	0.292521	1.14198	0.203419	1.98969	0.192103	2.3717
PMM0497	PMED4_05461	priA primosomal protein N' (replication factor Y)	9.06419	0.242344	19.4	0.514339	18	1	11.0 DNA replication, recombination, and repair	11.0 DNA replication, recombination, and repair	1.07485	0.263083	0.807132	0.00179673	1.08861	0.143906	0.819322	0.0869343	1.04974	0.278508	1.00972	0.129695	1.27197	0.10535	1.07646	0.324228	1.03302	0.292093	1.03528	0.117328	1.0001	0.328854	0.862558	0.100136	1.06216	0.28962	0.852446	0.205107	1.14517	0.342332	1.05447	0.136852	1.12449	0.219255	1.12619	0.106288	1.22631	0.115254	1.0686
PMM0498	PMED4_05471	conserved hypothetical protein	12.5467	0.0383939	2.2	0.739181	11	0.869277	16.0 Hypothetical	16.1 Conserved hypothetical protein	1.44115	0.0579486	0.846651	0.137438	0.570363	0.266121	0.678604	0.113057	0.690957	0.221433	0.873797	0.0930158	1.13253	0.0208022	1.05452	0.148906	0.996114	0.0159324	1.05302	0.134276	1.23504	0.206465	1.07601	0.193022	1.11176	0.177247	0.856416	0.194067	0.952188	0.0897652	0.798259	0.0754782	0.837246	0.0182304	0.919208	0.153352	1.2029	0.30293	1.0662
PMM0499	PMED4_05481	argB Aspartokinase superfamily	15.2544	0.000846433	3.4	0.894165	13	0.305533	1.0 Amino acid biosynthesis	1.4 Glutamate family / Nitrogen assimilation	1.20507	0.107275	1.00856	0.197448	1.01945	0.314796	0.803242	0.264305	0.82212	0.0837436	0.869037	0.0274658	0.952363	0.0663509	0.998382	0.0183937	1.05224	0.0486636	1.13875	0.00975854	1.17837	0.0484355	1.17116	0.0682154	0.991196	0.0481681	0.882171	0.0353734	0.82741	0.092878	0.803289	0.0940422	0.838275	0.00669202	0.887778	0.004931	0.891447	0.0111475	0.98659
PMM0500	PMED4_05491	conserved hypothetical protein	16.335	0.000331126	4.2	0.950663	15	0.975601	16.0 Hypothetical	16.1 Conserved hypothetical protein	1.26975	0.00575491	0.854136	0.291611	0.890111	0.380019	0.690465	0.421388	0.614775	0.172434	0.60123	0.00942236	0.665302	0.238503	0.822373	0.0538095	0.958326	0.27604	1.34904	0.248019	1.47576	0.0774961	1.52799	0.205571	1.15791	0.394674	0.947477	0.324525	0.795092	0.153002	0.758719	0.0347772	0.655698	0.215973	0.583907	0.00250884	0.730212	0.308034	1.00829
PMM0502	PMED4_05511	conserved hypothetical protein	16.4243	0	17.6	0.94183	5	0.998211	16.0 Hypothetical	16.1 Conserved hypothetical protein	0.340194	0.0270241	0.368336	0.0827033	1.55417	0.165617	3.15817	0.573938	2.96871	0.610167	3.46597	0.283931	1.83664	0.367054	1.17639	0.047336	0.868737	0.0408205	0.664558	0.017291	0.534317	0.120815	0.335245	0.00441692	0.275136	0.0383717	0.35521	0.0880638	1.60677	0.187088	3.04842	0.208028	3.91536	0.432887	3.18508	0.418206	2.15399	0.0340011	1.33798
PMM0503	PMED4_05521	possible precorrin-6X reductase	14.5238	0.00557491	0.2	0.847673	11	0.504002	2.0 Biosynthesis of cofactors, prosthetic groups, and carriers	2.3 Cobalamin, heme, phycobilin and porphyrin	1.12722	0.0474993	0.79106	0.132153	0.684482	0.0380875	0.620001	0.182124	0.765909	0.089774	1.00112	0.0117366	1.6192	0.0989348	1.6098	0.173493	1.17864	0.186066	1.25933	0.0123031	1.05078	0.212991	1.08827	0.0813083	0.95471	0.0430585	0.694758	0.179131	0.667432	0.0447611	0.820753	0.0787352	0.714604	0.0454434	0.94044	0.0913536	1.43647	0.0687624	1.34286
PMM0504	PMED4_05531	CutA1 divalent ion tolerance protein	9.74944	0.186649	23	0.562748	18	1	3.0 Cell envelope	3.1 Membranes, lipoproteins and porins	1.02461	0.141077	0.854163	0.0872361	0.817686	0.108155	0.824639	0.0154404	0.908921	0.0995507	1.07399	0.135342	1.08682	0.149388	1.11756	0.10278	1.06338	0.0845243	0.858905	0.0103572	0.962093	0.0895572	1.06543	0.285849	0.99859	0.0896311	0.909473	0.0806423	1.07227	0.0398948	0.919812	0.116477	1.08487	0.00671504	0.979645	0.0505039	1.28633	0.0210232	1.07042
PMM0505	PMED4_05541	Possible carbohydrate kinase	12.7208	0.0328701	1.4	0.748805	11	0.951392	15.0 Other categories	15.7 Other	1.74102	0.192047	0.83492	0.211965	0.700478	0.194385	0.513971	0.073205	0.541005	0.301378	0.924451	0.0272461	1.44213	0.165655	1.34492	0.088916	1.33698	0.130842	1.19835	0.163515	1.10052	0.241901	1.26969	0.0654498	1.0482	0.387772	0.790007	0.0322849	0.83029	0.213311	0.798258	0.073722	0.655765	0.0484786	0.858711	0.0293401	1.11729	0.0269875	1.27604
PMM0506	PMED4_05551	purA,adeK Adenylosuccinate synthetase	13.4446	0.0174625	6	0.769046	16	0.874784	9.0 Purines, pyrimidines, nucleosides, and nucleotides	9.2 Purine ribonucleotide biosynthesis	1.56029	0.0253813	1.37231	0.18337	1.24319	0.257493	0.879416	0.162377	0.625825	0.066104	0.680038	0.0215398	1.00415	0.023694	1.02549	0.0379251	0.985112	0.0127107	1.07646	0.00149427	1.09688	0.0149264	1.20455	0.0930947	1.1972	0.241913	1.11562	0.185102	1.04285	0.01101	0.759992	0.0437992	0.668603	0.0222935	0.681513	0.016519	0.873827	0.0618153	0.862297
PMM0507	PMED4_05561	psb27 possible Photosystem II reaction center Psb27protein	15.9103	0.000408998	5	0.917877	16	0.905766	8.0 Photosynthesis and respiration	8.6 Photosystem II	1.28448	0.107172	1.15898	0.0658358	0.969463	0.133985	0.572585	0.0533356	0.357413	0.0281614	0.480638	9.366e-05	0.649563	0.143733	0.900142	0.0906531	0.894245	0.103883	1.13066	0.122331	1.25024	0.0424817	1.21313	0.0916915	1.13346	0.221201	1.09369	0.121413	1.05463	0.126264	0.704521	0.0397155	0.426936	0.0464692	0.480951	0.0595629	0.673334	0.0899334	0.8739
PMM0508	PMED4_05571	proS Prolyl-tRNA synthetase	15.1287	0.00147059	0.6	0.885953	10	0.778777	13.0 Translation	13.1 Aminoacyl tRNA synthetases and tRNA modification	0.913579	0.0716313	0.876627	0.230235	0.786846	0.00191073	0.725614	0.0278053	0.599209	0.113595	0.924946	0.0799082	1.11122	0.263914	1.37615	0.107855	1.63425	0.200487	1.72881	0.0349339	1.35774	0.0733467	0.930682	0.0130253	0.816455	0.0995437	0.824884	0.0795999	1.00981	0.00688297	0.970549	0.0217612	0.933332	0.0846791	1.04966	0.114377	1.33069	0.302674	1.69237
PMM0509	PMED4_05581	possible Helix-turn-helix domain of resolvase	11.4018	0.0824242	18.6	0.649564	6	0.534534	10.0 Regulatory functions	10.0 Regulatory functions	0.855666	0.0558994	0.686222	0.0092134	0.830672	0.0629705	0.957892	0.219033	0.819113	0.399715	1.24634	0.23217	0.994614	0.251	1.04903	0.0131481	0.96419	0.153062	0.972849	0.0145283	0.976755	0.106753	0.784725	0.111853	0.727664	0.220266	0.839539	0.115315	1.13313	0.176273	1.64603	0.345829	1.6636	0.0680089	1.19009	0.065256	1.04519	0.0534519	1.0422
PMM0510	PMED4_05591	possible Reverse transcriptase (RNA-dependent	16.3819	0.000361011	3.8	0.957442	13	0.784057	15.0 Other categories	15.6 Transposon-related functions	1.09868	0.00654544	0.839545	0.11721	0.592393	0.0234259	0.433926	0.030087	0.405669	0.103837	0.596863	0.0627412	0.790994	0.208479	1.12168	0.0169921	1.2525	0.447295	1.4727	0.20963	1.9805	0.042418	1.71328	0.00460869	1.23638	0.343352	1.08139	0.278062	0.787755	0.0242449	0.597411	0.0216786	0.480595	0.0597304	0.455652	0.10189	0.73001	0.134489	1.04253
PMM0511	PMED4_05601	ppa (ipyR) Inorganic pyrophosphatase	16.6992	0	3.4	0.978969	13	0.959833	15.0 Other categories	15.7 Other	1.06849	0.0248463	0.771762	0.0277113	0.698376	0.140565	0.444662	0.011849	0.375137	0.0839966	0.503324	0.0242484	0.789596	0.0491847	1.1739	0.0182851	1.20918	0.0622613	1.45542	0.168891	1.59651	0.00710779	1.40975	0.0777338	1.08367	0.165071	0.812479	0.119956	0.602541	0.0819608	0.462593	0.0490152	0.402217	0.0645427	0.494462	0.0633164	0.72252	0.010639	1.05699
PMM0512	PMED4_05611	putative arsenate reductase	14.6937	0.00459662	3.6	0.859776	12	0.509364	4.0 Cellular processes	4.5 Detoxification	1.53208	0.193631	0.861005	0.0277888	0.758025	0.230772	0.709116	0.110861	0.653673	0.178656	0.935787	0.0312514	0.98255	0.0169177	1.10245	0.302967	1.05355	0.0324122	1.24182	0.186839	1.38336	0.0794755	1.30251	0.195153	1.11136	0.158254	0.880562	0.00545329	0.852947	0.111431	0.869826	0.00272661	0.839489	0.126947	0.747364	0.154617	0.981794	0.144015	0.984637
PMM0513	PMED4_05621	lepB Signal peptidase I	14.1408	0.00854232	2.6	0.832428	12	0.608748	4.0 Cellular processes	4.6 Protein and peptide secretion	1.26194	0.0932672	0.79233	0.10493	0.625085	0.274309	0.53035	0.0459911	0.516977	0.204853	0.882389	0.0856403	1.04216	0.0621749	1.22211	0.124222	1.12591	0.126004	1.16153	0.119853	1.26258	0.167127	1.18333	0.0361508	0.980926	0.112785	0.836069	0.00494739	0.899116	0.0720416	0.825603	0.093693	0.871752	0.0435213	0.806948	0.0601032	1.02161	0.030932	0.870205
PMM0514	PMED4_05631	putative dihydroorotase	15.1149	0.00146396	3.4	0.886052	12	0.533006	10.0 Regulatory functions	10.0 Regulatory functions	1.28046	0.00228697	0.877217	0.159343	0.82004	0.0427401	0.523199	0.143351	0.483349	0.200553	0.658521	0.0446062	0.901741	0.125595	1.0314	0.00048958	1.12647	0.0417694	1.13941	0.026242	1.31135	0.127532	1.09663	0.209656	1.09102	0.0493587	0.952789	0.0700915	0.873779	0.0481805	0.72048	0.119459	0.665787	0.111605	0.748986	0.0193621	0.942874	0.0382816	1.03927
PMM0515	PMED4_05641	cobC possible alpha-ribazole-5'-P phosphatase	16.2405	0.000283286	4.2	0.945115	15	0.870947	2.0 Biosynthesis of cofactors, prosthetic groups, and carriers	2.3 Cobalamin, heme, phycobilin and porphyrin	1.07172	0.0645228	1.02694	0.234568	0.795413	0.0433811	0.503829	0.038829	0.487032	0.0556856	0.579092	0.014598	0.756871	0.0966404	0.964883	0.0358994	1.04	0.134467	1.23209	0.132526	1.33249	0.000204423	1.32613	0.197899	1.17137	0.126309	1.0915	0.121061	0.893778	0.0461335	0.751883	0.00656876	0.636699	0.0368536	0.680448	0.0455386	0.781138	0.158695	1.00012
PMM0516	PMED4_05651	Possible membrane associated protease	13.6712	0.0145104	1.4	0.804175	11	0.646386	13.0 Translation	13.3 Degradation of proteins, peptides, and glycopeptides	1.09149	0.118616	0.782188	0.115106	0.825278	0.0684635	0.800113	0.228556	0.758308	0.051344	0.897934	0.00611568	1.14457	0.235131	1.13696	0.0384101	1.10855	0.245584	1.23466	0.106166	1.3765	0.0761705	1.09392	0.036437	1.07534	0.300087	0.953196	0.085844	0.889467	0.0750113	0.888239	0.0219201	0.971927	0.0786933	0.948205	0.0603517	1.18444	0.106504	0.980114
PMM0517	PMED4_05661	hypothetical protein	15.9151	0.000410678	18.8	0.905494	6	0.847772	16.0 Hypothetical	16.2 No similarity	0.93531	0.109762	0.787024	0.105474	0.696499	0.0945445	1.05142	0.206111	1.61423	0.252743	4.67881	0.198727	2.9026	0.634386	1.7299	0.115095	0.941979	0.143647	0.867196	0.156283	0.876506	0.132269	0.795614	0.0852977	0.873949	0.0305504	0.718207	0.0476031	1.02742	0.149883	1.72632	0.523078	2.94455	1.37959	3.72411	0.0973125	3.48873	0.773281	1.95239
PMM0518	PMED4_05671	ftsI putative peptidoglycan synthetase (pbptranspeptidase domain)	15.3749	0.000924703	19.2	0.872871	7	0.55571	10.0 Regulatory functions	10.0 Regulatory functions	0.930352	0.0378821	0.681061	0.0384687	0.802377	0.0161352	0.952053	0.148857	1.36632	0.0398927	2.54919	0.0532687	1.83001	0.352775	1.43098	0.00990839	1.02532	0.0286139	0.848828	0.11721	0.861932	0.059735	0.835347	0.0924744	0.777121	0.0586957	0.711039	0.012517	0.894434	0.12134	1.1976	0.0620584	1.72009	0.0140854	2.33579	0.114898	2.0254	0.0202073	1.5169
PMM0519	PMED4_05681	tal Transaldolase	17.0381	0	17.6	0.978544	5	0.998669	15.0 Other categories	15.7 Other	0.369334	0.0543615	0.576882	0.0964553	1.83487	0.00335428	3.22536	0.0198977	3.30566	1.14022	4.39054	0.598344	2.85886	0.116513	1.7874	0.0427388	0.896079	0.0442977	0.673278	0.00702848	0.51517	0.0166196	0.344427	0.0476553	0.305392	0.00505537	0.530126	0.0681902	2.00515	0.198837	3.41751	0.0528498	4.6331	0.708171	4.37195	0.155149	3.36842	0.0905604	1.84436
PMM0520	PMED4_05691	NAD binding site	12.2393	0.0505688	0.2	0.715071	10	0.723966	15.0 Other categories	15.7 Other	1.05594	0.0843184	0.7857	0.160978	0.771722	0.0993108	0.860707	0.0902233	0.897822	0.115012	1.05781	0.0403839	0.97947	0.260864	1.08377	0.248642	1.02743	0.00142676	1.02715	0.0209743	1.09881	0.227446	1.1503	0.0827916	0.942568	0.0637675	0.883526	0.0175973	0.905318	0.103281	0.962761	0.108736	0.946871	0.0743473	1.01662	0.0289991	1.28912	0.0593844	1.10104
PMM0521	PMED4_05701	frr,rrf Ribosome recycling factor	12.4634	0.0416763	23.6	0.724414	9	0.488966	15.0 Other categories	15.7 Other	1.01085	0.113533	0.943202	0.0293223	0.746926	0.100866	0.772081	0.00771523	0.744637	0.330896	1.04324	0.00920912	1.15042	0.39279	1.07626	0.0479244	1.08709	0.112982	1.09043	0.033107	1.14504	0.00483418	1.11949	0.105647	0.884997	0.213558	0.775268	0.00700596	0.736539	0.190297	0.809625	0.0349023	0.921453	0.23534	0.958478	0.0632332	1.09666	0.118545	1.00992
PMM0522	PMED4_05711	pyrH,smbA uridylate kinase	8.70225	0.274065	0.8	0.510392	17	1	9.0 Purines, pyrimidines, nucleosides, and nucleotides	9.3 Pyrimidine ribonucleotide biosynthesis	1.32362	0.165498	0.961433	0.10561	0.761857	0.0141424	0.684922	0.163299	0.729384	0.444516	1.02982	0.0688767	1.23247	0.0490191	1.225	0.0708717	1.07889	0.0117772	1.05159	0.0478612	1.05535	0.0675741	1.1031	0.092954	1.01743	0.260677	0.831663	0.209699	0.755007	0.0412773	0.73739	0.0381194	0.842773	0.0481028	0.842675	0.0281434	1.04157	0.0729308	0.93257
PMM0523	PMED4_05721	cobO possible cob(I)alamin adenosyltransferase	16.1146	0.000506329	19	0.915893	6	0.916513	2.0 Biosynthesis of cofactors, prosthetic groups, and carriers	2.3 Cobalamin, heme, phycobilin and porphyrin	0.615207	0.112278	0.64913	0.0797949	0.878461	0.0426893	0.830985	0.185344	0.912713	0.46981	1.42019	0.0691744	1.33565	0.456593	1.26927	0.125098	0.990296	0.141029	0.977239	0.0521908	0.807668	0.0688381	0.791399	0.0853361	0.768381	0.100032	0.765309	0.0138754	1.10074	0.0804967	1.36763	0.0710889	1.64535	0.593197	1.6031	0.22764	1.41878	0.033448	1.38564
PMM0524	PMED4_05731	Phage integrase family	14.0778	0.00880309	19.4	0.798556	6	0.427797	15.0 Other categories	15.6 Transposon-related functions	0.805235	0.0197817	0.788331	0.00341058	0.773641	0.0376824	0.78042	0.110466	1.11252	0.0372119	1.5016	0.539857	1.40124	0.221008	1.05234	0.00599222	0.842831	0.0198112	0.953089	0.0701932	0.921822	0.06319	0.959127	0.0512502	0.94778	0.101825	0.755265	0.0628036	0.901064	0.182851	1.22794	0.0321204	1.58583	0.083185	1.97565	0.29264	1.68176	0.0921688	1.45214
PMM0525	PMED4_05741	Ferrochelatase	15.2467	0.000840336	4.6	0.883151	15	0.887395	15.0 Other categories	15.7 Other	1.4383	0.249011	0.898536	0.100561	0.86068	0.0404631	0.59295	0.0514497	0.497064	0.192524	0.627221	0.0377532	0.816605	0.0571528	0.994076	0.105314	0.96334	0.0233852	1.05922	0.0898493	1.19961	0.109247	1.09759	0.0262149	1.21584	0.188187	1.02115	0.0866948	1.06005	0.0481524	0.794878	0.0673145	0.668615	0.0088092	0.624397	0.00333437	0.836778	0.0138117	1.02949
PMM0526	PMED4_05751	ilvH Acetolactate synthase large subunit	17.302	0	18.8	0.984271	6	0.868989	1.0 Amino acid biosynthesis	1.3 Branched chain family	0.626709	0.0230305	0.638418	0.0634859	0.939152	0.0481161	1.18053	0.0604122	1.44082	0.22996	2.00157	0.154959	1.75704	0.100906	1.44887	0.0247851	1.10626	0.0146407	0.858328	0.00371025	0.758133	0.0805497	0.579894	0.0482044	0.505463	0.0292016	0.59776	0.0535263	0.985698	0.00529641	1.492	0.0201497	1.80012	0.14254	2.09699	0.00301841	1.82053	0.101942	1.49746
PMM0527	PMED4_05761	conserved hypothetical protein	14.6736	0.00463392	20.2	0.831982	7	0.635076	16.0 Hypothetical	16.1 Conserved hypothetical protein	1.00931	0.20537	0.654014	0.10293	0.817624	0.378492	0.841312	0.099312	0.837319	0.240263	1.85689	0.0636664	1.31339	0.571452	1.26339	0.0731283	1.05774	0.148027	0.871144	0.0764978	1.04404	0.127529	0.789048	0.124047	0.789702	0.209934	0.626848	0.108841	0.915731	0.207004	1.34695	0.0137232	1.28768	0.0665733	1.54969	0.167931	1.46847	0.290502	1.27807
PMM0528	PMED4_05771	DUF152	12.7607	0.0314165	3	0.749575	12	0.502409	16.0 Hypothetical	16.1 Conserved hypothetical protein	1.48043	0.306941	0.844353	0.0909508	0.786425	0.0518824	0.558502	0.0433872	0.681991	0.190338	0.763303	0.191043	1.06629	0.272894	1.06025	0.198931	1.1023	0.0822332	0.997713	0.0122537	1.43517	0.270059	1.02308	0.256809	1.28328	0.466625	0.874198	0.176972	0.871459	0.10726	0.956639	0.116691	0.807581	0.230641	0.707618	0.0634692	1.06433	0.095644	1.1532
PMM0529	PMED4_05781	conserved hypothetical protein	13.9817	0.0103631	1.8	0.82369	12	0.413126	16.0 Hypothetical	16.1 Conserved hypothetical protein	1.12453	0.337854	0.949367	0.183501	0.705282	0.124921	0.535893	0.07678	0.48676	0.211726	0.858845	0.0363117	0.886227	0.475734	1.23769	0.268058	1.20108	0.295636	1.21169	0.0483791	1.26354	0.106584	1.07387	0.157735	0.867672	0.166471	0.842687	0.12783	0.886799	0.161315	0.858733	0.00250918	0.838382	0.00182538	0.883204	0.0232403	1.10998	0.254324	1.33806
PMM0530	PMED4_05791	rps1b, rpsA2, nbp1 30S ribosomal protein S1 homolog B, putativeNbp1	15.1827	0.00139697	2	0.894634	12	0.648334	13.0 Translation	13.2 Ribosomal proteins	0.936553	0.0375543	0.885064	0.0900812	0.695391	0.174696	0.709098	0.0246689	0.45075	0.364923	0.853204	0.0455068	0.950313	0.192463	1.10148	0.0243377	1.25179	0.03423	1.22986	0.0939904	1.16693	0.0250502	1.02712	0.017346	0.916113	0.180928	0.898227	0.00458808	0.9089	0.10378	0.916574	0.0498866	0.826445	0.188904	0.823205	0.061758	0.942896	0.145126	1.17614
PMM0531	PMED4_05801	Creatininase	15.7182	0.000336134	1.4	0.925251	11	0.881727	15.0 Other categories	15.7 Other	1.04199	0.205472	0.634668	0.146191	0.563189	0.0132695	0.457942	0.11718	0.469427	0.107088	0.807747	0.00162375	1.04852	0.242858	1.22086	0.0637165	1.16444	0.223788	1.34534	0.0519721	1.23437	0.0440461	1.0364	0.0675035	0.909987	0.22987	0.672665	0.157874	0.63689	0.0439078	0.668766	0.0349958	0.684342	0.0956643	0.810669	0.103853	1.08186	0.10509	1.43861
PMM0532	PMED4_05811	conserved hypothetical protein	13.7066	0.0143687	8.2	0.777185	2	0.750757	16.0 Hypothetical	16.1 Conserved hypothetical protein	1.73987	0.448084	1.28489	0.130883	0.956425	0.165615	0.753538	0.0547154	0.693155	0.241322	0.970611	0.0972317	0.829334	0.0490716	0.799409	0.09467	0.779866	0.15514	0.913979	0.107259	1.01733	0.000169768	1.08193	0.243225	1.40417	0.306528	1.20963	0.0419468	1.07824	0.0208282	0.93194	0.131754	0.959848	0.17287	0.885392	0.0697998	0.885375	0.116076	0.849982
PMM0533	PMED4_05821	conserved hypothetical protein	16.5681	0	5	0.956705	16	0.986265	16.0 Hypothetical	16.1 Conserved hypothetical protein	2.20788	0.515173	1.03221	0.092178	0.785392	0.0325023	0.525806	0.0822738	0.377875	0.101015	0.421911	0.0632672	0.702274	0.124724	0.875587	0.0764456	1.06022	0.0421721	1.35912	0.0232191	1.42056	0.0736422	1.61101	0.115917	1.3531	0.192792	1.13326	0.139707	0.84154	0.0365785	0.559433	0.0268264	0.40851	0.0098418	0.39551	0.0229319	0.580719	0.0198619	0.813748
PMM0534	PMED4_05831	accA acetyl-CoA carboxylase, alpha subunit	16.45	0	4.4	0.955089	15	0.89847	7.0 Fatty acid, phospholipid and sterol metabolism	7.0 Fatty acid, phospholipid and sterol metabolism	1.80252	0.291964	1.06049	0.0914185	0.794895	0.103667	0.526318	0.106711	0.418658	0.0201248	0.477767	0.049822	0.781073	0.178996	0.948018	0.183671	1.11505	0.182503	1.31835	0.141111	1.50307	0.0232204	1.59738	0.296293	1.33125	0.351034	1.08754	0.126253	0.824569	0.113439	0.658353	0.0202714	0.473494	0.0672806	0.538242	0.0829256	0.787126	0.130696	0.963861
PMM0535	PMED4_05841	putative short-chain dehydrogenase	15.7342	0.00034188	4.2	0.915561	15	0.920813	10.0 Regulatory functions	10.0 Regulatory functions	1.65519	0.22899	0.941127	0.0765426	0.658639	0.106093	0.419187	0.0160589	0.435223	0.294708	0.457895	0.0283111	0.767075	0.0728314	0.950461	0.0129736	1.18581	0.0206549	1.24014	0.00913861	1.36136	0.070078	1.44372	0.194421	1.30171	0.133952	1.04577	0.0614393	0.957881	0.163327	0.648513	0.0823101	0.481597	0.250705	0.526079	0.136118	0.833618	0.156959	0.904058
PMM0536	PMED4_05851	folE putative GTP cyclohydrolase I	15.5387	0.000438596	4.2	0.904164	13	0.855744	2.0 Biosynthesis of cofactors, prosthetic groups, and carriers	2.4 Folic acid	1.25075	0.254209	0.91121	0.122697	0.585605	0.0194156	0.393342	0.081598	0.21166	0.10109	0.400012	0.00897806	0.775672	0.110871	0.931954	0.0907127	1.02962	0.0293057	1.11287	0.0297015	1.09328	0.0330869	1.15795	0.0611941	1.15257	0.0880838	1.06829	0.134608	0.852254	0.0525866	0.573283	0.0510499	0.409592	0.11619	0.447559	0.0305105	0.716895	0.0352891	1.00179
PMM0537	PMED4_05861	trpF phosphoribosylanthranilate isomerase	4.55037	0.707061	22.4	0.261191	18	1	1.0 Amino acid biosynthesis	1.1 Aromatic amino acid family	1.16224	0.212453	0.788216	0.113803	0.849933	0.0833862	0.762975	0.0622245	0.910389	0.239264	0.936824	0.125199	1.0665	0.0662692	0.944263	0.094433	0.855368	0.0237964	0.921297	0.361686	0.906538	0.271664	0.911616	0.101707	0.914481	0.130316	0.853063	0.0500163	0.958363	0.0917747	1.144	0.178143	1.0946	0.170613	1.03892	0.0665402	1.0292	0.0817215	0.937526
PMM0538	PMED4_05871	conserved hypothetical protein	15.3176	0.000881612	18.6	0.872629	6	0.974776	16.0 Hypothetical	16.1 Conserved hypothetical protein	0.748569	0.000689545	0.645533	0.029782	0.810286	0.0195665	1.02315	0.0760985	1.1182	0.340282	1.63578	0.0891225	1.32676	0.0509384	1.20269	0.0357765	0.998055	0.0479155	0.848318	0.0166003	0.918513	0.280255	0.789884	0.112678	0.888573	0.0831693	0.761586	0.22771	1.05266	0.0240966	1.56851	0.265342	1.64395	0.366858	1.47699	0.138161	1.57441	0.166399	1.04531
PMM0539	PMED4_05881	Biotin/lipoate A/B protein ligase family	11.5632	0.0761781	22.4	0.663445	9	0.696153	2.0 Biosynthesis of cofactors, prosthetic groups, and carriers	2.5 Lipoate	0.969889	0.182847	0.847909	0.015663	0.906291	0.0309469	0.749209	0.0231762	0.916766	0.05057	1.2647	0.07977	1.09835	0.0137735	1.1729	0.207889	1.01143	0.111297	1.01766	0.227612	0.949842	0.0605621	0.962823	0.180549	1.01109	0.0650759	0.747492	0.0384936	0.853846	0.0488553	0.963564	0.13439	1.09284	0.051511	0.923194	0.0212553	1.14521	0.0732272	1.06635
PMM0540	PMED4_05891	psaM possible photosystem I reaction centre subunitXII (PsaM)	16.7933	0	8	0.952201	1	0.999007	8.0 Photosynthesis and respiration	8.5 Photosystem I	1.56927	0.0316054	1.48205	0.0155963	1.21104	0.160963	0.837026	0.247441	0.526585	0.312094	0.51716	0.0198122	0.530224	0.0476325	0.661266	0.013217	0.745363	0.0717229	1.03669	0.072748	1.19749	0.206913	1.31321	0.00978744	1.39967	0.189936	1.54362	0.0806467	1.41415	0.0814193	0.98619	0.0380283	0.639397	0.0517338	0.485565	0.0067497	0.424958	0.00409249	0.536509
PMM0541	PMED4_05901	conserved hypothetical protein	16.4836	0	7.2	0.935583	1	0.969104	16.0 Hypothetical	16.1 Conserved hypothetical protein	2.76749	0.136554	1.61486	0.0237106	1.33228	0.0633976	0.944799	0.0686513	0.556769	0.132497	0.609133	0.0488567	0.719308	0.0697819	0.774384	0.0735162	0.79042	0.187462	1.10394	0.105237	1.42267	0.0173437	1.60473	0.0286073	1.51897	0.670069	1.46636	0.404673	1.22263	0.265398	0.876551	0.0450113	0.597595	0.120461	0.535575	0.00317669	0.559594	0.0621945	0.611337
PMM0542	PMED4_05911	por, pcr Light dependent protochlorophyllideoxido-reductase	15.3609	0.000911458	6.4	0.8761	16	0.681188	2.0 Biosynthesis of cofactors, prosthetic groups, and carriers	2.3 Cobalamin, heme, phycobilin and porphyrin	2.13996	0.544844	1.36546	0.423396	0.940384	0.203707	0.7515	0.314457	0.583359	0.0175977	0.59283	0.0312712	0.712857	0.219059	0.884061	0.0425726	0.835639	0.0370402	1.0195	0.109136	1.32898	0.0247164	1.65398	0.350468	1.66778	0.578545	1.6142	0.627421	1.22623	0.0476702	0.995312	0.00893867	0.682734	0.00692724	0.56991	0.0201731	0.801412	0.117441	0.931917
PMM0543	PMED4_05921	chlL,frxC Protochlorophyllide reductase iron-sulfurATP-binding protein	14.8405	0.00356436	17.8	0.850571	5	0.463835	2.0 Biosynthesis of cofactors, prosthetic groups, and carriers	2.3 Cobalamin, heme, phycobilin and porphyrin	0.944062	0.0727769	1.08847	0.104077	1.02342	0.0289879	1.02714	0.0158193	0.910808	0.306726	1.26351	0.23029	1.27119	0.247572	1.14736	0.0572506	0.947434	0.0888732	0.89871	0.123646	0.827608	0.00193884	0.833422	0.0666988	0.766334	0.068105	0.927823	0.0449897	1.01277	0.0730508	0.998937	0.0410588	1.10659	0.058383	1.13299	0.0575386	1.07657	0.0559452	1.04915
PMM0544	PMED4_05931	chlB Light-independent protochlorophyllide reductasesubunit B	16.9291	0	20.4	0.960247	7	0.884344	2.0 Biosynthesis of cofactors, prosthetic groups, and carriers	2.3 Cobalamin, heme, phycobilin and porphyrin	0.469255	0.099057	0.448859	0.00184156	0.768653	0.24338	1.08251	0.313006	1.40562	0.310664	1.71496	0.108002	1.4998	0.250897	1.36828	0.024292	1.22458	0.00129803	0.989728	0.0742508	0.808568	0.157622	0.577319	0.0211005	0.354209	0.0106405	0.362612	0.0112982	0.661689	0.0504201	1.01894	0.187506	1.37524	0.150034	1.86913	0.175026	1.81133	0.0159783	1.58724
PMM0545	PMED4_05941	chlN Light-independent protochlorophyllide reductasesubunit N	17.0857	0	20.2	0.968671	7	0.903988	2.0 Biosynthesis of cofactors, prosthetic groups, and carriers	2.3 Cobalamin, heme, phycobilin and porphyrin	0.463923	0.0578974	0.470001	0.0237471	0.803968	0.129723	1.07878	0.135102	1.40491	0.0123998	1.77805	0.0309374	1.78614	0.0181171	1.55087	0.00517894	1.15052	0.00389547	0.996535	0.0221355	0.776439	0.0239534	0.597973	0.00899259	0.339392	0.00707248	0.343958	0.0384082	0.600916	0.0354132	0.974876	0.0553898	1.29388	0.097645	1.75333	0.0523121	1.75986	0.0173652	1.49939
PMM0546	PMED4_05951	conserved hypothetical	16.391	0.00037037	18.4	0.934554	6	0.86548	16.0 Hypothetical	16.1 Conserved hypothetical protein	0.51967	0.05762	0.497792	0.140917	0.897496	0.0212228	1.96952	0.129758	2.77843	0.697079	4.26102	0.146928	3.18939	0.312718	1.71377	0.0648875	0.918672	0.165963	0.871478	0.0126999	0.850547	0.0401959	0.737027	0.0610309	0.594921	0.115983	0.453385	0.12507	1.11832	0.326476	2.40739	0.0208597	3.73032	0.408115	4.24156	0.279529	3.41965	0.0125218	1.92372
PMM0547	PMED4_05961	conserved hypothetical protein	16.4155	0	5	0.948229	16	0.642822	16.0 Hypothetical	16.1 Conserved hypothetical protein	3.45555	2.29682	1.29532	0.288835	0.762121	0.0387837	0.64355	0.194842	0.482013	0.0927324	0.497321	0.0588672	0.872414	0.0141245	0.928613	0.152778	1.15891	0.366394	2.03867	0.0697283	2.59286	0.867062	2.7028	0.608664	2.00262	0.922556	1.15894	0.426743	0.891949	0.0819315	0.556286	0.0757948	0.617799	0.0335301	0.456328	0.0501887	0.684087	0.0437898	0.914075
PMM0548	PMED4_05971	HAM1 family protein	14.547	0.00536028	2.6	0.856354	12	0.858729	15.0 Other categories	15.7 Other	1.20316	0.124267	0.755891	0.0617423	0.633195	0.00220049	0.569417	0.0950693	0.546148	0.0183667	0.814667	0.0889574	0.957142	0.190612	1.1466	0.0605619	1.03686	0.0309161	1.06496	0.0485813	1.12877	0.0903472	0.996249	0.0933173	1.00467	0.10296	0.883759	0.00288592	0.834085	0.045059	0.747169	0.060464	0.713355	0.0651059	0.787188	0.0679539	1.00768	0.0518296	1.06642
PMM0549	PMED4_05981	csoS1 carboxysome shell protein CsoS1	16.7632	0	5.2	0.965926	16	0.986264	8.0 Photosynthesis and respiration	8.2 CO2 fixation	2.29908	0.0781773	1.7834	0.132861	0.771331	0.0422754	0.445004	0.00163432	0.275909	0.011849	0.352418	0.212483	0.74247	0.29024	0.772111	0.328982	1.03597	0.381116	2.0324	0.390379	2.13493	0.430411	2.30231	0.0986778	2.06879	0.206403	1.5072	0.0258209	0.733158	0.257189	0.328593	0.195668	0.32367	0.295897	0.293426	0.197631	0.419079	0.0690319	0.682305
PMM0550	PMED4_05991	rbcL, cbbL Ribulose bisphosphate carboxylase, large chain	17.1375	0	5.8	0.981516	16	0.993401	8.0 Photosynthesis and respiration	8.2 CO2 fixation	4.09273	0.0154943	3.20945	0.0942341	0.999659	0.250015	0.177857	0.0678344	0.103627	0.0213656	0.090149	0.0203558	0.15307	0.0325757	0.247484	0.0346219	0.821737	0.335319	2.59546	0.903159	3.45962	0.623542	3.92937	0.0615129	3.7319	0.169598	2.82287	0.0176599	0.906372	0.0127655	0.144307	0.00972532	0.0913386	0.0206682	0.100042	0.0226578	0.0931906	0.0076801	0.277921
PMM0551	PMED4_06001	rbcS, cbbS Ribulose bisphosphate carboxylase, small chain	17.1447	0	6	0.98109	16	0.978951	8.0 Photosynthesis and respiration	8.2 CO2 fixation	4.66983	0.0399534	3.3232	0.416527	1.00278	0.45139	0.143815	0.114018	0.0811703	0.0305512	0.0804772	0.0188505	0.116237	0.0361154	0.199158	0.0333733	0.678403	0.271122	2.45301	0.989602	3.99055	0.195154	4.44334	0.273419	4.4185	0.156738	3.60042	0.443397	1.02727	0.034346	0.163798	0.029217	0.107817	0.0102309	0.0984305	0.01855	0.0920411	0.00916717	0.233886
PMM0552	PMED4_06011	csoS2 carboxysome shell protein CsoS2	17.0708	0	5.8	0.977737	16	0.947284	8.0 Photosynthesis and respiration	8.2 CO2 fixation	5.41398	1.24338	3.90016	0.722145	0.920668	0.255548	0.151618	0.0568907	0.104963	0.0210152	0.16424	0.00178739	0.20812	0.0445492	0.297536	0.0354283	0.824898	0.229633	3.0347	1.09864	4.9191	0.344471	5.68093	0.127889	5.21075	0.537883	3.84221	0.31943	0.98418	0.0212423	0.251576	0.0140581	0.187291	0.00456084	0.203925	0.0391687	0.241133	0.00720449	0.358012
PMM0553	PMED4_06021	csoS3 carboxysome shell protein CsoS3	16.716	0	6	0.956115	16	0.835336	8.0 Photosynthesis and respiration	8.2 CO2 fixation	3.62889	0.422896	1.83794	0.145177	0.995358	0.0715492	0.560587	0.00165077	0.696922	0.0949571	0.708789	0.0737053	0.726694	0.0822994	0.789322	0.199793	0.979562	0.0493148	1.72509	0.108206	2.57685	0.0303542	2.93734	0.406703	3.21802	0.0453633	2.31623	0.0301609	0.928783	0.0772714	0.648085	0.00387108	0.603212	0.136069	0.607315	0.102946	0.716978	0.147755	0.76166
PMM0554	PMED4_06031	putative carboxysome peptide A	12.5231	0.039171	5.4	0.72067	15	0.4308	8.0 Photosynthesis and respiration	8.2 CO2 fixation	1.32315	0.142079	1.04887	0.032036	0.952297	0.242494	0.753968	0.0401824	0.868686	0.0290071	1.08351	0.189662	1.03085	0.0505566	0.978244	0.230332	0.917157	0.03183	1.03927	0.076453	1.18657	0.0446618	1.3015	0.0808702	1.19023	0.0854244	1.08854	0.0222131	0.863081	0.053339	0.812434	0.0930972	0.835592	0.12657	0.928907	0.0494017	0.881398	0.0347515	0.781359
PMM0555	PMED4_06041	putative carboxysome peptide B	14.0565	0.00892995	5.8	0.805389	15	0.402541	8.0 Photosynthesis and respiration	8.2 CO2 fixation	1.37582	0.0963259	1.22416	0.106223	0.956886	0.146145	0.829572	0.0554753	0.774697	0.111944	1.06889	0.0919548	0.941424	0.0365709	0.93352	0.064423	0.918436	0.0794247	1.08365	0.044141	1.35166	0.034718	1.51783	0.207518	1.44928	0.0905556	1.08042	0.168049	0.880912	0.00317818	0.878683	0.146851	0.867518	0.111004	0.98227	0.0552727	0.920954	0.0073421	0.863956
PMM0556	PMED4_06051	conserved hypothetical protein	11.2261	0.0921627	0.2	0.655655	10	0.796056	16.0 Hypothetical	16.1 Conserved hypothetical protein	0.910201	0.11226	0.826053	0.154435	0.641715	0.175851	0.60472	0.181303	0.508646	0.205287	0.996553	0.174548	0.989419	0.168161	1.33026	0.568291	1.18103	0.15609	0.947227	0.102999	1.03937	0.0842632	0.963537	0.0826165	0.884783	0.384672	0.880667	0.247081	1.17406	0.217579	1.14555	0.0845602	0.837891	0.13517	0.938777	0.0760553	1.16938	0.18951	1.4933
PMM0557	PMED4_06061	conserved hypothetical	16.2109	0.000540541	5.6	0.930542	16	0.952892	16.0 Hypothetical	16.1 Conserved hypothetical protein	1.55965	0.117532	1.13272	0.156131	0.671458	0.132533	0.520457	0.0742736	0.409422	0.184086	0.524489	0.027307	0.782113	0.0831241	0.905606	0.121238	0.997878	0.00988815	1.1985	0.0122779	1.35168	0.209004	1.51332	0.0392057	1.54014	0.380662	1.28727	0.12168	1.12544	0.00515206	0.777311	0.0658363	0.597856	0.00701751	0.568292	0.0426979	0.626275	0.0107254	0.730283
PMM0558	PMED4_06071	conserved hypothetical protein	16.465	0	19	0.935432	6	0.912268	16.0 Hypothetical	16.1 Conserved hypothetical protein	0.637298	0.0851584	0.527768	0.00629239	0.973174	0.205242	1.02099	0.0201928	1.21869	0.253613	1.51289	0.0277564	1.38862	0.0542481	1.23813	0.195876	0.994279	0.0315086	0.883947	0.146654	0.862644	0.122437	0.733382	0.00447921	0.622095	0.151607	0.648254	0.0325427	1.03489	0.13911	1.3342	0.210794	1.35229	0.00785116	1.49602	0.0152682	1.30159	0.0242985	1.26646
PMM0559	PMED4_06081	Putative hydroxyacylglutathione hydrolase	12.0977	0.0552031	23.2	0.699756	10	0.762187	15.0 Other categories	15.7 Other	0.864605	0.15124	0.513942	0.156598	0.716117	0.0235078	0.486848	0.0516195	0.618094	0.258065	0.915545	0.13004	1.35724	0.287347	1.33157	0.155025	0.99686	0.162375	1.04558	0.158963	0.909363	0.118064	0.997421	0.260675	0.884004	0.169271	0.834778	0.068619	0.88369	0.082799	1.17681	0.0442116	1.08233	0.164558	1.04833	0.0647361	1.55083	0.47755	1.32164
PMM0560	PMED4_06091	possible ATP phosphoribosyltransferase	15.2602	0.000850547	3.4	0.894381	13	0.998601	15.0 Other categories	15.7 Other	1.24438	0.316724	0.93923	0.0847446	0.728693	0.154117	0.463686	0.15557	0.357098	0.105417	0.571944	0.0143302	0.950241	0.03416	1.25226	0.118266	1.26331	0.13391	1.1847	0.193528	1.26186	0.0469667	1.14629	0.11554	1.01821	0.0239052	0.923313	0.0919745	0.868943	0.0103088	0.637784	0.0264832	0.465383	0.00124719	0.551671	0.00335696	0.771444	0.0531412	1.14801
PMM0561	PMED4_06101	putative multidrug efflux ABC transporter	14.2638	0.00731113	4.8	0.825664	15	0.659676	14.0 Transport and binding proteins	14.0 Transport and binding proteins	1.34567	0.038319	1.0637	0.0719888	0.892256	0.0259878	0.571191	0.0462641	0.595494	0.180141	0.625397	0.0810572	0.865277	0.0796968	1.09783	0.0867182	1.03014	0.115223	1.14049	0.0441201	1.11983	0.0439331	1.11307	0.0574685	1.40377	0.273806	1.09561	0.145402	0.996284	0.017545	0.749697	0.0136803	0.775993	0.0362183	0.625351	0.0033588	0.833156	0.0358006	0.989461
PMM0562	PMED4_06111	possible acetyltransferase	13.3892	0.0186361	3	0.786293	13	0.728379	15.0 Other categories	15.7 Other	1.58153	0.26227	0.953698	0.0525343	0.749908	0.0390427	0.627873	0.0600204	0.581666	0.198728	0.763989	0.0718838	1.21141	0.0693399	1.34656	0.193729	1.27075	0.0542931	1.17693	0.191924	1.10317	0.0577741	1.19354	0.113256	1.12375	0.0350607	0.9302	0.00581555	0.908087	0.0425808	0.689747	0.0848946	0.65425	0.0825023	0.656151	0.0451619	0.894585	0.00344522	1.0057
PMM0563	PMED4_06121	conserved hypothetical protein	15.2141	0.000943396	2.6	0.895616	12	0.545507	16.0 Hypothetical	16.1 Conserved hypothetical protein	1.15972	0.188128	0.915517	0.130626	0.673828	0.194518	0.700405	0.0593031	0.739588	0.154875	0.809654	0.0362673	0.976245	0.234461	1.01003	0.0110518	1.04335	0.27865	1.15584	0.0902129	1.13473	0.3422	1.11567	0.0693244	0.971094	0.0372023	0.913604	0.0147915	0.737606	0.0500867	0.757374	0.192991	0.825565	0.0738397	0.824816	0.0272663	1.02457	0.0956103	1.09383
PMM0564	PMED4_06131	conserved hypothetical protein	15.7261	0.000338983	3.4	0.921928	13	0.483771	16.0 Hypothetical	16.1 Conserved hypothetical protein	1.30518	0.18125	0.908265	0.0307351	0.708791	0.0213715	0.519559	0.0830104	0.488491	0.205192	0.701637	0.00438688	0.907029	0.265307	1.17139	0.00863167	1.14478	0.127826	1.23076	0.135866	1.27211	0.0754665	1.25358	0.148739	1.09822	0.176338	0.898547	0.161059	0.86434	0.059189	0.865971	0.0957672	0.667251	0.0107095	0.663613	0.0238468	0.888215	0.0769247	1.03312
PMM0565	PMED4_06141	dnaA chromosomal replication initiator protein DnaA	16.9211	0	16.4	0.982444	4	0.963841	11.0 DNA replication, recombination, and repair	11.0 DNA replication, recombination, and repair	0.791217	0.00510136	0.941714	0.0840298	1.35772	0.0840034	1.6121	0.0571419	1.51779	0.651697	2.13759	0.0810838	1.83639	0.338117	1.306	0.0499773	0.755984	0.0155959	0.45828	0.0371373	0.477891	0.0895765	0.474278	0.0206613	0.773316	0.132396	0.910911	0.116913	1.61185	0.0343538	2.03737	0.270248	2.26088	0.000221118	2.26646	0.171337	1.81206	0.0729376	1.16087
PMM0566	PMED4_06151	conserved hypothetical protein	8.28523	0.314275	23	0.478486	18	1	16.0 Hypothetical	16.1 Conserved hypothetical protein	1.03713	0.0892392	0.819124	0.0500034	0.854614	0.11492	0.799462	0.0656266	0.98319	0.0781435	0.910619	0.0942957	0.986436	0.0727875	1.07464	0.184767	1.03936	0.163931	0.944352	0.166734	0.988795	0.126617	0.980767	0.00952706	1.05778	0.328467	0.912688	0.0148531	1.01855	0.00639675	1.09476	0.0428268	1.10896	0.143352	1.0342	0.235883	1.22106	0.0726941	1.14576
PMM0567	PMED4_06161	gshR probable glutathione reductase (NADPH)	12.8612	0.0290104	3.4	0.753504	13	0.492996	2.0 Biosynthesis of cofactors, prosthetic groups, and carriers	2.12 Thioredoxin, glutaredoxin, and glutathione	1.20593	0.191421	1.08697	0.130626	0.915063	0.00424622	0.738208	0.0477969	0.707758	0.0884605	0.754347	0.0215335	1.02017	0.174347	1.09824	0.0826846	0.993542	0.263036	1.03935	0.0783235	1.08095	0.0758617	1.18803	0.232293	1.08395	0.130056	0.871322	0.171006	1.09345	0.138264	0.783953	0.0253021	0.809173	0.181597	0.754879	0.0726654	1.14281	0.24589	1.06832
PMM0568	PMED4_06171	putative CaCA family sodium/calcium exchanger	14.1282	0.00851563	1	0.830283	10	0.760953	14.0 Transport and binding proteins	14.0 Transport and binding proteins	1.01271	0.123223	0.585044	0.136884	0.700875	0.00168235	0.554041	0.127182	0.573081	0.0279976	0.862435	0.166223	1.05576	0.0625875	1.29142	0.0483101	1.15472	0.0946346	1.10685	0.00229389	1.14127	0.244167	1.05769	0.0351267	0.91834	0.0847555	0.803001	0.0719681	0.881007	0.0599542	0.880859	0.0683741	0.956287	0.109474	0.781271	0.0863892	1.07498	0.0999068	1.14765
PMM0569	PMED4_06181	pyrC Dihydroorotase	11.6173	0.0747517	23.6	0.674442	10	0.490406	9.0 Purines, pyrimidines, nucleosides, and nucleotides	9.3 Pyrimidine ribonucleotide biosynthesis	1.10896	0.141471	0.809768	0.0892095	0.859485	0.101203	0.775849	0.156415	0.81116	0.053764	1.12279	0.377213	1.16188	0.28033	1.10481	0.0347319	0.924818	0.104933	1.04026	0.0969578	0.981773	0.181846	0.92542	0.110402	1.09241	0.231656	0.860198	0.0186821	0.842571	0.144675	0.884123	0.0861814	1.00146	0.00754731	1.20378	0.233835	1.401	0.278301	1.16867
PMM0570	PMED4_06191	ndhL NADH dehydrogenase subunit NdhL (ndhL)	16.1827	0.000529101	19.8	0.917437	7	0.910127	8.0 Photosynthesis and respiration	8.4 NADH dehydrogenase	0.818959	0.0230992	0.730781	0.0607034	0.865972	0.0890803	0.974819	0.200531	1.21555	0.501821	2.67248	0.0285384	3.00323	0.516428	2.45166	0.522818	1.38225	0.110787	1.06345	0.125304	1.11045	0.13192	0.921612	0.199814	0.775044	0.163146	0.688433	0.197473	0.812455	0.093144	1.06835	0.304417	1.29662	0.567751	1.89051	0.378038	2.37735	0.58954	1.92877
PMM0571	PMED4_06201	conserved hypothetical protein	15.2236	0.000951249	21.2	0.865728	9	0.577595	16.0 Hypothetical	16.1 Conserved hypothetical protein	1.14517	0.0968327	0.656379	0.0994515	0.711274	0.123409	0.851836	0.404047	0.986115	0.0136391	1.94744	0.130823	2.26319	1.06365	1.89755	0.0655369	1.22438	0.0430227	1.00574	0.0338648	1.04688	0.122884	0.894542	0.147262	0.75766	0.112872	0.563091	0.252486	0.904761	0.0901519	0.911167	0.0581348	1.23533	0.540903	1.6564	0.324348	2.28162	0.119683	1.99152
PMM0572	PMED4_06211	trpA Tryptophan synthase alpha chain	13.3418	0.0195725	22.6	0.767502	9	0.833786	1.0 Amino acid biosynthesis	1.1 Aromatic amino acid family	1.04982	0.215968	0.735242	0.284446	0.822075	0.225554	0.681039	0.241707	0.822724	0.0737249	1.2752	0.141383	1.30896	0.421769	1.31388	0.0984954	1.12198	0.275803	0.981914	0.0168291	1.00923	0.00540848	0.972137	0.160882	0.856526	0.31027	0.861001	0.146194	0.888711	0.0607711	0.861885	0.0272394	1.09269	0.207837	1.2663	0.0508112	1.54421	0.0609702	1.40999
PMM0573	PMED4_06221	conserved hypothetical protein	15.6244	0.000308642	1	0.917412	11	0.729216	16.0 Hypothetical	16.1 Conserved hypothetical protein	0.887906	0.0723389	0.751572	0.0269442	0.564429	0.104214	0.423019	0.141089	0.423086	0.198492	0.941695	0.0691164	1.35091	0.033451	1.41464	0.211247	1.18683	0.0177573	1.17057	0.0328435	1.14567	0.0836391	1.09493	0.0929682	0.86146	0.0837303	0.751335	0.0420595	0.628845	0.0159931	0.531727	0.0819234	0.556119	0.0522705	0.851478	0.0462487	1.20507	0.0175922	1.28387
PMM0574	PMED4_06231	conserved hypothetical protein	11.3949	0.0830979	3.6	0.667029	15	0.23674	16.0 Hypothetical	16.1 Conserved hypothetical protein	1.31709	0.333112	1.09346	0.361415	0.75156	0.264875	0.604141	0.00294264	0.62709	0.331185	1.09265	0.184576	0.956828	0.201049	1.23992	0.0426684	1.16889	0.311407	1.06534	0.0848073	1.33014	0.282779	1.46792	0.0615891	1.19662	0.448205	0.843374	0.205977	0.826818	0.204526	0.834055	0.0224346	0.90806	0.129273	0.780541	0.25301	0.923227	0.262413	0.96129
PMM0575	PMED4_06241	conserved hypothetical	16.512	0	17	0.95272	5	0.935846	16.0 Hypothetical	16.1 Conserved hypothetical protein	0.623968	0.028473	0.680228	0.102727	1.42489	0.106899	2.25346	0.337244	3.12647	0.329557	3.34017	0.0454992	2.55642	0.774063	1.42954	0.10913	0.736601	0.133948	0.634048	0.120746	0.647913	0.103849	0.677354	0.0472003	0.649014	0.026097	0.901424	0.239396	2.17344	0.127995	3.5682	0.314739	4.26202	0.109285	4.51794	0.295785	2.99055	0.125766	1.69875
PMM0576	PMED4_06251	conserved hypothetical protein	16.8721	0	17	0.9744	5	0.943677	16.0 Hypothetical	16.1 Conserved hypothetical protein	0.519452	0.119965	0.627068	0.322869	2.10891	0.315698	3.20403	0.701411	4.08622	0.521563	5.48103	0.886166	3.55431	0.887301	1.86344	0.385633	0.654864	0.0280343	0.404224	0.0217507	0.430834	0.206384	0.397219	0.0073252	0.415136	0.0169268	0.779346	0.297083	3.16228	0.13354	5.08904	0.396715	6.75924	0.768734	6.25267	0.78574	3.95587	0.136585	1.67803
PMM0577	PMED4_06261	Putative type II alternative sigma factor,sigma70 family	17.0351	0	16.6	0.987131	4	0.521245	12.0 Transcription	12.2 RNA synthesis, modification, and DNA transcription	0.464512	0.0581429	0.799748	0.126992	2.17962	0.537508	3.34359	0.745275	3.42873	2.15445	5.67032	0.247811	3.40096	0.804627	1.58866	0.0472576	0.633033	0.0108317	0.368614	0.0201708	0.354893	0.0636328	0.318612	0.0409607	0.352944	0.00323142	0.997382	0.102452	3.34079	0.649191	6.09136	1.03706	6.95365	0.138983	6.43263	0.31602	3.78592	0.215433	1.52927
PMM0578	PMED4_06271	Phosphoribosyl-AMPcyclohydrolase	14.7285	0.00426136	0.6	0.863461	10	0.792584	1.0 Amino acid biosynthesis	1.1 Aromatic amino acid family	1.06227	0.205957	0.812234	0.0309078	0.743268	0.00221845	0.732174	0.101794	0.674663	0.176775	0.965396	0.0417036	1.05586	0.221101	1.01403	0.0132889	1.0712	0.0264482	1.11608	0.0602261	1.10614	0.114587	1.00561	0.0586938	0.91125	0.180393	0.810664	0.161826	0.87148	0.164358	0.929115	0.00602333	0.856397	0.242218	1.00046	0.152097	1.17954	0.213413	1.1424
PMM0579	PMED4_06281	conserved hypothetical protein	16.7089	0	17.8	0.956868	5	0.941629	16.0 Hypothetical	16.1 Conserved hypothetical protein	0.715462	0.224566	0.609781	0.104581	1.31436	0.15506	1.94174	0.317307	2.21303	0.806669	3.28128	0.570999	2.94513	0.162396	2.05872	0.257285	0.915837	0.0496289	0.702463	0.0502001	0.717782	0.0529236	0.619864	0.0369376	0.609203	0.0431087	0.507044	0.0621354	1.12976	0.119723	1.92374	0.0657429	2.26616	0.179669	2.45726	0.247403	2.37923	0.24296	1.26358
PMM0580	PMED4_06291	clpB1 ATP-dependent Clp protease, Hsp 100, ATP-bindingsubunit ClpB	11.4847	0.0793967	0.8	0.674149	10	0.899073	13.0 Translation	13.3 Degradation of proteins, peptides, and glycopeptides	1.04365	0.110451	0.741605	0.111617	0.84182	0.0864133	0.771952	0.155962	0.775739	0.0672928	0.851764	0.0487064	1.06883	0.214008	1.05644	0.0914055	1.0253	0.092395	1.02479	0.0145605	1.07916	0.143404	0.959604	0.0400069	1.05481	0.16385	0.981247	0.111584	0.965799	0.142702	1.01499	0.0251044	0.949469	0.203071	1.02057	0.110853	1.29751	0.104908	1.34698
PMM0581	PMED4_06301	petE plastocyanin	16.7224	0	9.2	0.951039	1	0.640896	8.0 Photosynthesis and respiration	8.8 Soluble electron carriers	1.29899	0.15039	1.3235	0.267623	1.35118	0.331298	1.06755	0.118571	0.876087	0.0587666	0.809374	0.0185612	0.809997	0.119624	0.824994	0.0397453	0.803326	0.177187	0.966762	0.19264	1.04258	0.0426791	1.12299	0.0921838	1.23898	0.151079	1.27861	0.18408	1.29111	0.108972	1.1086	0.131819	0.977738	0.11674	0.783107	0.0115415	0.74099	0.105871	0.713182
PMM0582	PMED4_06311	conserved hypothetical protein	16.0767	0.000478469	5.2	0.926575	16	0.94251	16.0 Hypothetical	16.1 Conserved hypothetical protein	2.1166	0.112448	1.31316	0.45518	0.909771	0.00186622	0.601376	0.201602	0.483852	0.0698728	0.529805	0.00412605	0.710226	0.230127	0.879995	0.190944	1.23143	0.355628	1.29238	0.163848	1.71401	0.140435	1.57475	0.115492	1.52907	0.233804	1.1521	0.246659	0.933886	0.0250027	0.732029	0.0989326	0.577911	0.0427158	0.561391	0.0337045	0.801774	0.0643544	0.907305
PMM0583	PMED4_06321	hemE Uroporphyrinogen decarboxylase (URO-D)	16.7335	0	6	0.957554	16	0.997642	2.0 Biosynthesis of cofactors, prosthetic groups, and carriers	2.3 Cobalamin, heme, phycobilin and porphyrin	1.53574	0.0812879	1.52047	0.150819	1.1574	0.364702	0.588949	0.129502	0.330416	0.00807568	0.323227	0.00416839	0.498686	0.0297863	0.665061	0.0629401	0.862389	0.151782	1.11888	0.200841	1.44684	0.00565321	1.59112	0.202801	1.4963	0.200656	1.40794	0.273897	1.08748	0.0274297	0.62283	0.0174403	0.349566	0.0401063	0.322603	0.00877224	0.530491	0.0796244	0.739318
PMM0584	PMED4_06331	glgB 1,4-alpha-glucan branching enzyme	16.7056	0	4.8	0.967107	16	0.936664	5.0 Central intermediary metabolism	5.3 Polysaccharides and glycoproteins	1.44781	0.0146239	1.06162	0.0682723	0.79137	0.0262379	0.460119	0.000599618	0.362007	0.0442502	0.389794	0.00795213	0.646914	0.0577201	0.818504	0.0984439	1.11723	0.0130826	1.29669	0.00708728	1.31099	0.00534915	1.38867	0.108818	1.24518	0.045852	1.01177	0.0376082	0.785909	0.0422925	0.527003	0.0189107	0.381593	0.0727123	0.435507	0.0340849	0.610959	0.0367626	0.825873
PMM0585	PMED4_06341	conserved hypothetical protein	14.0876	0.00873937	1.2	0.828592	11	0.523949	16.0 Hypothetical	16.1 Conserved hypothetical protein	1.02535	0.144176	0.71598	0.0364157	0.814275	0.110347	0.686274	0.13664	0.709075	0.0790953	0.820049	0.0117885	1.1319	0.145676	1.18362	0.112581	1.16391	0.0883296	1.12158	0.129154	1.03036	0.174069	1.0604	0.036298	1.01847	0.0833757	0.887922	0.143178	0.888273	0.0722189	0.851133	0.0459322	0.86357	0.0389477	0.999945	0.194498	0.978412	0.0693167	1.18224
PMM0586	PMED4_06351	conserved hypothetical	13.9523	0.0105697	1.4	0.821134	10	0.715095	16.0 Hypothetical	16.1 Conserved hypothetical protein	0.794622	0.0928259	0.615461	0.113856	0.587729	0.0551757	0.517905	0.136007	0.502361	0.336801	0.959161	0.103858	0.861853	0.12771	1.03117	0.052072	1.15178	0.0034719	1.23815	0.0482632	1.22348	0.0363433	1.07787	0.0249147	0.843843	0.14458	0.784571	0.0110376	0.859271	0.0090182	0.915436	0.057702	0.941121	0.198488	0.957912	0.0650472	0.948094	0.148135	1.18292
PMM0587	PMED4_06361	conserved hypothetical	13.4286	0.0177793	1.2	0.789507	11	0.799034	16.0 Hypothetical	16.1 Conserved hypothetical protein	1.13905	0.22028	0.772583	0.212704	0.863145	0.073082	0.661643	0.0522716	0.643154	0.320098	0.920998	0.0296995	1.08333	0.0356907	1.23125	0.074059	1.06354	0.0755568	1.01274	0.086828	1.1923	0.182767	1.10227	0.0364994	1.03231	0.0754784	0.954231	0.04261	0.764061	0.119077	0.9043	0.136155	0.934198	0.117171	0.943146	0.0334701	1.13799	0.183047	1.17357
PMM0588	PMED4_06371	conserved hypothetical protein	12.6513	0.0346635	4.6	0.733824	15	0.48444	16.0 Hypothetical	16.1 Conserved hypothetical protein	1.38096	0.263142	0.721446	0.227146	0.72973	0.0601479	0.64507	0.0702114	0.683669	0.231599	0.741168	0.0523845	0.89099	0.146411	0.959778	0.171513	0.927652	0.0521376	1.06474	0.0146669	1.30028	0.121047	1.27891	0.0462609	1.26519	0.142911	0.847533	0.281116	0.976671	0.0513955	1.12838	0.0370643	0.930356	0.0952271	0.823126	0.0388499	0.876756	0.0231056	0.891386
PMM0589	PMED4_06381	conserved hypothetical	14.7753	0.00404235	19.6	0.838112	7	0.664449	16.0 Hypothetical	16.1 Conserved hypothetical protein	0.908472	0.111341	0.822128	0.0418258	0.900866	0.0523584	0.905304	0.166193	1.05792	0.0834901	1.3903	0.0168617	1.37508	0.0879068	1.15697	0.049319	0.927313	0.157414	0.858824	0.0305255	0.949594	0.137655	0.859476	0.000323976	0.857079	0.0826777	0.838664	0.0274543	0.969526	0.122862	1.06401	0.0649972	1.32121	0.0225342	1.49805	0.0176252	1.5499	0.304161	1.2716
PMM0590	PMED4_06391	proA Gamma-glutamyl phosphate reductase	15.6175	0.000307692	3.6	0.914201	12	0.873653	1.0 Amino acid biosynthesis	1.4 Glutamate family / Nitrogen assimilation	1.16488	0.0436988	0.836534	0.0590235	0.801562	0.0113185	0.640466	0.0991913	0.57855	0.0521514	0.716207	0.0287272	0.865011	0.0810397	1.00747	0.0517357	1.0858	0.0834713	1.18339	0.00043774	1.34528	0.0713429	1.2774	0.136519	1.07718	0.202355	0.957006	0.13016	0.933302	0.0152828	0.867352	0.00636875	0.732115	0.0874957	0.733617	0.0165769	0.870887	0.0485907	1.14131
PMM0591	PMED4_06401	folB Possible dihydroneopterin aldolase	14.8836	0.00343088	2.8	0.875511	12	0.757064	2.0 Biosynthesis of cofactors, prosthetic groups, and carriers	2.4 Folic acid	1.19386	0.0484219	0.901951	0.167991	0.86517	0.0471009	0.567895	0.00118886	0.664794	0.0779689	0.847592	0.138061	0.897968	0.0509777	1.13173	0.133611	1.13725	0.0469206	1.10869	0.0409632	1.38911	0.361159	1.05418	0.0804756	1.19753	0.310585	0.808355	0.151473	0.833072	0.171008	0.821568	0.127665	0.888532	0.018367	0.834791	0.0135737	0.95287	0.0918783	1.03427
PMM0592	PMED4_06411	lipase family protein	9.36558	0.215958	22.8	0.539761	18	1	7.0 Fatty acid, phospholipid and sterol metabolism	7.0 Fatty acid, phospholipid and sterol metabolism	1.45331	0.445633	0.608695	0.152859	0.928454	0.0483192	0.748442	0.0738657	0.860576	0.23851	1.00679	0.0772675	1.27647	0.124139	1.29742	0.432962	1.22131	0.319009	0.909469	0.0888566	1.04295	0.411334	0.939732	0.0470601	0.996803	0.152595	0.809968	0.118953	0.95328	0.082406	0.978196	0.050559	1.21133	0.180192	0.897278	0.231445	1.13391	0.330679	1.11868
PMM0593	PMED4_06421	Peptidase family M3	15.4411	0.000819672	7.6	0.875584	2	0.807665	15.0 Other categories	15.7 Other	1.88372	0.000164541	1.5518	0.147586	1.10944	0.0268817	0.502554	0.0183961	0.577933	0.175668	0.55719	0.00980544	0.64459	0.0262488	0.696475	0.00135236	0.718682	0.0276843	0.88517	0.0200941	1.19715	0.044846	1.38015	0.134572	2.16224	0.351171	1.82965	0.194435	1.67351	0.138749	0.986307	0.0516114	0.910135	0.0756751	0.688058	0.0452697	0.745933	0.055223	0.779519
PMM0594	PMED4_06431	ndhD putative NADH Dehydrogenase (complex I) subunit(chain 4)	16.4449	0	5.6	0.944365	16	0.939241	8.0 Photosynthesis and respiration	8.4 NADH dehydrogenase	1.37069	0.0242006	1.05708	0.0910153	1.00281	0.214625	0.755678	0.261091	0.609856	0.0112443	0.616585	0.00517189	0.796042	0.0198782	0.908075	0.00321918	0.899069	0.0861723	1.04345	0.0409219	1.27239	0.163829	1.29665	0.0996397	1.37714	0.240177	1.16046	0.120313	0.988058	0.0241072	0.690446	0.0250616	0.625558	0.0865173	0.57871	0.0655886	0.731523	0.0344239	0.804579
PMM0595	PMED4_06441	thrB Homoserine kinase	16.0833	0.000487805	5	0.92913	16	0.801955	1.0 Amino acid biosynthesis	1.2 Aspartate family	1.55185	0.131735	1.14665	0.0263578	0.839672	0.0413714	0.600154	0.025687	0.560331	0.124993	0.681354	0.0957966	0.929961	0.0572901	0.960262	0.0477324	1.12111	0.193902	1.22557	0.134514	1.20035	0.124326	1.32407	0.0638032	1.28037	0.0279102	1.13135	0.0306074	0.878603	0.0700901	0.743694	0.00817382	0.691543	0.0770945	0.726512	0.0112464	0.75626	0.10524	0.935155
PMM0596	PMED4_06451	Putative glucokinase	13.5054	0.0166436	1.8	0.795631	11	0.907314	6.0 Energy metabolism	6.2 Glycolysis	1.30256	0.218272	0.765652	0.118933	0.734566	0.124139	0.777853	0.0989897	0.799267	0.148385	0.888982	0.00692294	0.963987	0.0549077	1.22105	0.114356	1.13786	0.0558364	1.1322	0.105145	1.05506	0.151343	1.08966	0.0819931	1.0413	0.140612	0.8744	0.0864378	0.865984	0.243658	0.867181	0.0899683	0.870731	0.188418	0.921532	0.023385	1.08812	0.135984	1.05232
PMM0597	PMED4_06461	thrS Threonyl-tRNA synthetase	12.9958	0.0259912	1	0.76373	11	0.771328	1.0 Amino acid biosynthesis	1.2 Aspartate family	1.2265	0.0161059	0.871772	0.149542	0.722592	0.0422918	0.5283	0.0923555	0.660147	0.159524	1.01189	0.00968769	1.03706	0.200117	1.12579	0.0318971	1.1702	0.0356764	1.06472	0.13632	1.1307	0.145966	1.03838	0.103426	1.0086	0.121253	0.827791	0.0468723	0.740718	0.0730239	0.692459	0.0340913	0.848243	0.0719304	1.09855	0.0773069	1.14375	0.089967	1.1484
PMM0598	PMED4_06471	trpS Tryptophanyl-tRNA synthetase	15.873	0.0003861	3.2	0.931774	13	0.769907	13.0 Translation	13.1 Aminoacyl tRNA synthetases and tRNA modification	1.48528	0.400028	0.97031	0.233539	0.624453	0.0125105	0.527315	0.00233643	0.423726	0.157393	0.720845	0.0213134	0.872566	0.130063	1.0564	0.0867052	1.36149	0.0387009	1.34507	0.0535045	1.40412	0.0224976	1.35719	0.115236	0.97438	0.434743	0.864264	0.0800332	0.723299	0.0716511	0.69038	0.0409209	0.611631	0.099201	0.676345	0.105014	0.967654	0.19515	0.992838
PMM0599	PMED4_06481	conserved hypothetical protein	16.4479	0	4.8	0.950434	16	0.963486	16.0 Hypothetical	16.1 Conserved hypothetical protein	1.11069	0.17981	1.0854	0.112776	0.633207	0.265841	0.367458	0.15286	0.230781	0.14602	0.34993	0.0146624	0.546002	0.125697	0.769104	0.06879	1.06036	0.0212829	1.22496	0.0602816	1.23894	0.0407827	1.20546	0.0187767	1.15813	0.0712331	1.04516	0.0111003	0.742348	0.0564623	0.527663	0.00860918	0.38897	0.00905073	0.351973	0.0352246	0.505022	0.0501722	0.815286
PMM0600	PMED4_06491	conserved hypothetical protein	9.49734	0.205729	6.6	0.541082	17	1	16.0 Hypothetical	16.1 Conserved hypothetical protein	1.08524	0.0189108	0.976748	0.157758	0.689826	0.11041	0.769099	0.212255	0.741146	0.0107528	0.880523	0.00335485	0.773849	0.207163	0.846372	0.0349728	0.852049	0.060818	0.909396	0.121739	1.02847	0.0479594	1.13476	0.174246	1.15428	0.102446	1.22782	0.238973	1.17045	0.0600297	1.08977	0.0656106	1.09561	0.0180677	1.02005	0.0275804	0.838093	0.153381	0.885285
PMM0601	PMED4_06501	ABC transporter, substrate binding protein,possibly Mn	6.24466	0.524056	4	0.363834	17	1	14.0 Transport and binding proteins	14.0 Transport and binding proteins	1.55923	0.257373	0.92977	0.276876	0.858579	0.134466	0.712067	0.12857	0.706384	0.279269	1.03607	0.0458304	1.1332	0.110461	1.07609	0.030282	0.907434	0.0468131	0.973929	0.00734015	1.09352	0.0359652	1.22006	0.091189	1.14683	0.33494	0.96197	0.173885	0.872398	0.164686	0.950008	0.0170782	0.982482	0.000466272	1.04274	0.0504106	0.995501	0.203189	0.913851
PMM0602	PMED4_06511	ABC transporter, ATP binding domain, possibly Mntransporter	8.14885	0.3272	6.4	0.46475	17	1	14.0 Transport and binding proteins	14.0 Transport and binding proteins	1.65586	0.357357	1.00375	0.0364758	1.08999	0.252204	0.904465	0.130362	0.853694	0.0220511	0.966149	0.15641	0.99691	0.0353922	1.02712	0.120703	1.01097	0.17898	0.945423	0.105426	0.973303	0.155941	1.04851	0.0717784	1.16104	0.196833	1.09849	0.0634068	1.01303	0.044691	0.942828	0.0746449	0.981109	0.00468295	0.930282	0.0519798	0.98063	0.0420825	0.944929
PMM0603	PMED4_06521	ABC transporter component, possibly Mn transport	4.30157	0.731202	7	0.24449	17	1	14.0 Transport and binding proteins	14.0 Transport and binding proteins	1.76357	0.839284	1.23728	0.20025	1.12697	0.267448	0.944733	0.0948255	1.108	0.182086	1.03251	0.290223	1.33894	0.0688109	1.08637	0.178054	0.951902	0.000212796	0.998461	0.05345	1.08205	0.114332	1.15079	0.0733586	1.23797	0.00865594	0.946021	0.144908	0.96626	0.0444843	0.96082	0.129676	0.898194	0.147864	0.964231	0.113101	1.01873	0.147677	0.879832
PMM0604	PMED4_06531	conserved hypothetical protein	11.0665	0.10146	4	0.645619	17	1	16.0 Hypothetical	16.1 Conserved hypothetical protein	1.38958	0.369202	0.954687	0.0635179	0.925238	0.0175889	0.838548	0.0816564	0.773036	0.0396526	0.93798	0.0797077	1.04956	0.0728142	0.951517	0.0396829	0.998757	0.0438865	1.00694	0.092169	1.07977	0.110368	1.07645	0.023499	1.18368	0.038939	0.922061	0.0973556	0.925161	0.10876	0.88336	0.0926972	1.05246	0.0721156	0.914323	0.0699846	1.01265	0.0295012	0.978673
PMM0605	PMED4_06541	conserved hypothetical protein	16.385	0.000364964	4.6	0.949583	16	0.477324	16.0 Hypothetical	16.1 Conserved hypothetical protein	1.48404	0.177588	1.10798	0.169403	0.591489	0.128966	0.31588	0.0114214	0.235925	0.0700104	0.321021	0.0267573	0.577051	0.113782	0.850876	0.15384	1.14885	0.219408	1.41638	0.0715243	1.54081	0.112571	1.62835	0.195042	1.4902	0.247846	1.17242	0.222599	0.826201	0.0651911	0.541701	0.0205403	0.326079	0.0197778	0.357006	0.0476022	0.600001	0.124901	0.914732
PMM0606	PMED4_06551	lepB leader peptidase I	15.0833	0.00166482	2.4	0.888089	12	0.592349	4.0 Cellular processes	4.6 Protein and peptide secretion	1.01238	0.218992	0.831386	0.154792	0.628894	0.147789	0.545253	0.115711	0.47685	0.275185	0.868977	0.105135	1.06347	0.130363	1.02691	0.144726	0.986667	0.0525666	1.18792	0.00216373	1.30123	0.0111097	1.28145	0.180575	1.00891	0.0825862	0.788386	0.206758	0.81483	0.0699401	0.794552	0.0849965	0.766089	0.0805812	0.844279	0.145249	1.11033	0.0739532	1.12288
PMM0607	PMED4_06561	menD Menaquinone biosynthesis protein; probable2-succinyl-6-hydroxy-2,4-cyclohexadiene-1-carboxylatesynthase	15.1331	0.00147727	2.8	0.890185	12	0.748556	2.0 Biosynthesis of cofactors, prosthetic groups, and carriers	2.6 Menaquinone and ubiquinone	1.08522	0.0263574	0.801687	0.0323926	0.74964	0.072946	0.72575	0.0721109	0.653242	0.0955379	0.787992	0.0142976	0.964143	0.0212086	1.11717	0.171886	1.00649	0.00601195	1.1772	0.219123	1.23353	0.156945	1.00733	0.0193463	1.07703	0.0597497	0.837149	0.00336492	0.931612	0.0298855	0.741225	0.0502497	0.830189	0.0410635	0.807388	0.000540918	0.974012	0.0431938	1.08859
PMM0608	PMED4_06571	menB Napthoate synthase	16.5701	0	4.8	0.95918	16	0.809089	2.0 Biosynthesis of cofactors, prosthetic groups, and carriers	2.6 Menaquinone and ubiquinone	1.51618	0.0754606	1.10453	0.134294	0.993335	0.156446	0.585735	0.100758	0.500597	0.147243	0.594834	0.00250685	0.811626	0.0374448	0.892489	0.0163434	1.03245	0.0204337	1.13004	0.0806924	1.38072	0.0149538	1.31289	0.14941	1.26497	0.11975	0.975682	0.0562702	0.811114	0.021285	0.592888	0.030818	0.547124	0.070864	0.557887	0.0224637	0.728322	0.0306497	0.89464
PMM0609	PMED4_06581	Putative ADPglucose--glucosyltransferase (GlgA)	16.8882	0	4.8	0.977243	15	0.56126	5.0 Central intermediary metabolism	5.3 Polysaccharides and glycoproteins	1.44377	0.0239698	1.1205	0.21794	0.93703	0.469541	0.501186	0.220971	0.354001	0.0494658	0.404981	0.0325775	0.611467	0.0931966	0.752726	0.118106	0.997123	0.204719	1.32599	0.191753	1.62304	0.08508	1.71798	0.12913	1.41417	0.235713	1.11222	0.133185	0.799799	0.0635536	0.516233	0.00773569	0.414007	0.00782334	0.445674	0.00121674	0.606398	0.0606676	0.812374
PMM0610	PMED4_06591	murF Cytoplasmic peptidoglycan synthetases,N-terminal	12.0819	0.0559068	5	0.697985	15	0.442913	3.0 Cell envelope	3.2 Murein sacculus and peptidoglycan	1.19276	0.0470606	0.945004	0.141533	0.97102	0.0681675	0.844886	0.00514101	0.844436	0.0443662	0.905492	0.00970576	0.923432	0.0130428	0.998994	0.0278059	1.06339	0.0162663	0.992214	0.0102472	1.19755	0.00147076	1.17433	0.144836	1.279	0.105996	1.02364	0.0226889	0.918306	0.0867261	0.874146	0.0633507	0.973687	0.102224	0.827867	0.0531791	0.947918	0.222255	0.825387
PMM0611	PMED4_06601	glmU UDP-N-acetylglucosamine pyrophosphorylase	16.8538	0	21.4	0.960114	8	0.603482	15.0 Other categories	15.7 Other	0.736189	0.0658754	0.554337	0.102179	0.711337	0.0448511	0.756592	0.00281922	0.792351	0.200324	1.4435	0.078263	1.54396	0.462443	1.70018	0.04951	1.40823	0.0891541	1.17383	0.0537305	1.0131	0.0474803	0.756126	0.0518753	0.628816	0.0693342	0.587427	0.034988	0.791911	0.0633949	1.12149	0.151278	1.16898	0.205424	1.44417	0.342095	1.81728	0.390196	1.80292
PMM0612	PMED4_06611	conserved hypothetical protein	11.5158	0.0781538	2	0.678478	11	0.540222	16.0 Hypothetical	16.1 Conserved hypothetical protein	1.54679	0.140693	0.735555	0.0639512	0.705232	0.0382557	0.630641	0.241052	0.815733	0.216447	0.83738	0.218725	0.968988	0.0464388	0.990451	0.0651481	1.09115	0.0110862	0.984429	0.264275	1.08703	0.322962	1.02749	0.0782937	1.03082	0.0113369	0.814751	0.012281	0.953357	0.196618	0.783742	0.0120326	0.875473	0.174763	0.915951	0.00511349	1.08462	0.128691	1.11358
PMM0613	PMED4_06621	aroA EPSP synthase (3-phosphoshikimate1-carboxyvinyltransferase)	14.8115	0.00380859	3.4	0.86764	12	0.831822	1.0 Amino acid biosynthesis	1.1 Aromatic amino acid family	1.23277	0.0475458	0.867434	0.156288	0.643232	0.102477	0.55566	0.0342081	0.490194	0.225596	0.78825	0.00839391	0.939387	0.19175	1.06708	0.156327	1.16407	0.0632834	1.09889	0.107865	1.21301	0.0239486	1.22711	0.164192	1.11883	0.256125	1.03055	0.127829	0.892437	0.042614	0.857451	0.00901124	0.780136	0.11189	0.673686	0.0303132	0.952183	0.144771	1.00507
PMM0614	PMED4_06631	conserved hypothetical protein	12.9848	0.0263026	3.4	0.761217	12	0.417098	16.0 Hypothetical	16.1 Conserved hypothetical protein	1.22911	0.0721069	0.905565	0.048008	0.843421	0.0689511	0.755049	0.0872022	0.52928	0.221692	0.83874	0.140071	1.1112	0.0995118	1.21187	0.0793725	1.08656	0.0652642	1.16236	0.0433932	1.20143	0.0630211	1.16837	0.156581	1.27969	0.268308	1.02014	0.136888	0.978409	0.00234855	0.877796	0.0187208	0.881111	0.104768	0.892506	0.00303913	0.945976	0.0537494	0.972441
PMM0615	PMED4_06641	Possible nitrilase	14.7391	0.00418251	2.4	0.868026	11	0.837754	15.0 Other categories	15.7 Other	1.3384	0.0376261	0.804288	0.0652552	0.708163	0.0587478	0.610255	0.0553706	0.551491	0.105783	0.71966	0.210288	1.24078	0.0620323	1.27027	0.0483794	1.26409	0.0909018	1.17979	0.0235809	1.23173	0.0866423	1.19597	0.121623	1.15516	0.240667	0.781951	0.267511	0.746394	0.0481545	0.7425	0.0121452	0.635867	0.0751051	0.679639	0.0204165	0.979585	0.0306854	1.11361
PMM0616	PMED4_06651	Cell wall hydrolase/autolysin	12.6695	0.0342105	3.4	0.74275	12	0.691478	4.0 Cellular processes	4.1 Cell division	1.00186	0.0920548	0.85254	0.0789821	0.877222	0.126256	0.71022	0.0321708	0.734744	0.144306	0.844335	0.0146597	1.11279	0.206305	1.03922	0.0508503	1.03512	0.0381509	1.02917	0.0855226	1.15361	0.238549	1.15778	0.225532	1.13715	0.0524949	1.04758	0.0492093	0.92385	0.112482	0.952455	0.100209	0.902725	0.00115908	0.947187	0.023851	0.932681	0.0997302	1.01109
PMM0617	PMED4_06661	murI Putative aspartate and glutamateracemases	7.80478	0.361184	1.6	0.459683	18	1	3.0 Cell envelope	3.2 Murein sacculus and peptidoglycan	1.30163	0.556554	0.806747	0.0793364	0.922746	0.129893	0.85116	0.0192582	0.937955	0.298555	0.837413	0.0649136	1.01604	0.0508103	1.20618	0.155612	1.16253	0.167327	1.12746	0.139183	1.00615	0.24171	1.03417	0.0598025	1.06912	0.21527	0.93355	0.152681	1.09789	0.183936	0.902163	0.0621077	1.01967	0.197574	0.921518	0.0675455	1.07977	0.1436	1.01636
PMM0618	PMED4_06671	sds polyprenyl synthetase; solanesyl diphosphatesynthase (sds)	9.4313	0.210934	9.2	0.536667	17	1	2.0 Biosynthesis of cofactors, prosthetic groups, and carriers	2.2 Carotenoid	1.38579	0.012417	1.02496	0.25294	0.967365	0.0478488	0.724934	0.131909	0.834922	0.0279501	0.963088	0.0988213	0.973282	0.200616	0.893384	0.0225462	0.786975	0.0544204	0.859153	0.0154093	1.03706	0.126442	1.08973	0.198537	1.65716	0.399635	1.43209	0.142494	1.32795	0.0172365	1.18315	0.0505171	1.14946	0.0576106	0.971651	0.0850236	1.05434	0.0579893	1.01297
PMM0619	PMED4_06681	acs acetyl-coenzyme A synthetase	16.3433	0.0003367	15.8	0.954111	4	0.994153	6.0 Energy metabolism	6.4 Pyruvate and acetyl-CoA metabolism	0.926096	0.0114518	1.03743	0.0997549	1.13414	0.087549	1.18276	0.0735762	1.05217	0.515803	1.29453	0.12453	1.15389	0.0561557	1.00288	0.00608866	0.869749	0.0277433	0.849635	0.00747053	0.933224	0.0374596	0.913894	0.0364665	0.939193	0.0662883	0.989046	0.0216188	1.22266	0.0152382	1.43063	0.0847509	1.41345	0.0325725	1.34586	0.110951	1.17049	0.0503695	0.997742
PMM0620	PMED4_06691	conserved hypothetical protein	10.0405	0.164672	7.4	0.569813	18	1	16.0 Hypothetical	16.1 Conserved hypothetical protein	1.45149	0.0770723	0.932461	0.210191	1.17315	0.0236441	0.742148	0.00418432	0.847257	0.125523	0.899773	0.11804	0.870393	0.00597621	1.02217	0.0785759	0.9573	0.0889026	0.961712	0.0652779	1.05701	0.277953	1.01593	0.146508	1.14305	0.0496997	1.08499	0.078965	1.19554	0.148465	0.989418	0.10524	1.07978	0.155838	0.829928	0.0341599	0.970809	0.0283501	0.962947
PMM0621	PMED4_06701	dnaQ possible DNA polymerase III, epsilon subunit	16.4077	0.000381679	16.6	0.951584	5	0.811417	11.0 DNA replication, recombination, and repair	11.0 DNA replication, recombination, and repair	0.892867	0.150497	0.848037	0.222666	1.56712	0.176563	1.91143	0.187999	1.61252	0.831813	2.23118	0.162869	1.57923	0.201386	1.15025	0.0129954	0.906303	0.0648746	0.702578	0.133872	0.737467	0.236687	0.656587	0.0491938	0.708626	0.188828	0.674696	0.108075	1.6091	0.0559006	2.48129	0.391075	2.74342	0.136675	2.17779	0.347358	1.6627	0.155894	1.03949
PMM0622	PMED4_06711	conserved hypothetical protein	14.9364	0.003125	6.2	0.852263	16	0.895333	16.0 Hypothetical	16.1 Conserved hypothetical protein	1.82217	0.207982	1.60924	0.143932	1.30376	0.108341	0.818513	0.126353	0.531963	0.0670064	0.493953	0.0466911	0.838917	0.0176689	0.941639	0.10371	1.06126	0.0132416	1.24025	0.0744959	1.40018	0.0965304	1.66851	0.0615199	1.5695	0.00933087	1.35029	0.0983113	1.09634	0.106406	0.579687	0.0662626	0.366182	0.0106323	0.363052	0.0209638	0.541187	0.0496509	0.703167
PMM0623	PMED4_06721	hisS Histidyl-tRNA synthetase	14.5529	0.00529101	22.4	0.835862	9	0.848403	13.0 Translation	13.1 Aminoacyl tRNA synthetases and tRNA modification	0.88747	0.22321	0.70419	0.0595344	0.591705	0.0299706	0.515529	0.115372	0.693343	0.216129	1.23638	0.0513211	1.26078	0.177298	1.23792	0.0780116	1.18204	0.199456	1.03946	0.0122585	0.939535	0.0302319	0.903447	0.0290322	0.882544	0.167234	0.728146	0.159278	0.88434	0.000740225	1.0154	0.0333396	1.00067	0.243606	1.21087	0.0692752	1.51769	0.2835	1.37305
PMM0624	PMED4_06731	possible Hantavirus glycoprotein G2	12.4713	0.0414112	21.4	0.709838	8	0.663163	15.0 Other categories	15.7 Other	0.775832	0.103667	0.672765	0.216128	0.521192	0.168594	0.493745	0.12202	0.564407	0.341813	1.1807	0.238408	1.14237	0.391748	1.19627	0.0577994	1.04673	0.0273512	0.971094	0.0206025	0.951552	0.0883153	0.883563	0.190939	0.827424	0.188049	0.703647	0.159388	1.10887	0.0756703	1.21076	0.0961287	1.12452	0.228164	1.08018	0.000663227	1.24788	0.0976065	1.3031
PMM0625	PMED4_06741	hypothetical	7.20968	0.419784	20	0.408764	18	1	16.0 Hypothetical	16.2 No similarity	1.16903	0.126903	1.01881	0.0843757	1.01596	0.16201	0.835173	0.0475064	0.948253	0.369515	1.03588	0.122323	1.09789	0.182591	1.09319	0.0538583	0.952267	0.0273432	1.02782	0.058105	1.13828	0.379254	0.925711	0.129445	0.961995	0.070391	0.881091	0.0304063	1.15672	0.313907	0.947729	0.0674218	0.974883	0.00162586	1.16245	0.0715715	1.09169	0.132802	1.1035
PMM0626	PMED4_06751	hypothetical	16.1048	0.000502513	18.4	0.917972	6	0.978117	16.0 Hypothetical	16.2 No similarity	0.682052	0.0804088	0.597791	0.0212477	0.821167	0.104667	1.33253	0.0257474	1.41933	0.524753	3.26463	1.00009	2.26455	0.757517	1.45337	0.408565	0.958361	0.0721851	0.795179	0.208071	0.914844	0.0628669	0.798608	0.0331414	0.787494	0.065935	0.733034	0.0843292	1.02057	0.14139	2.10622	0.310506	2.79851	1.09315	3.88509	0.737627	3.06301	0.0073266	1.62071
PMM0627	PMED4_06771	pcb light-harvesting complex protein	14.9699	0.00254237	11.4	0.867261	3	0.97621	8.0 Photosynthesis and respiration	8.6 Photosystem II	1.13379	0.00110864	1.20414	0.0349952	1.18298	0.00960976	1.1499	0.00828024	1.04267	0.00948814	1.02589	0.0357467	0.928494	0.0177799	0.876496	0.0273588	0.840462	0.00696678	0.933657	0.0589297	1.00322	0.0155705	1.03406	0.0109105	1.00536	0.0264941	1.14316	0.103209	1.17602	0.0147069	1.11947	0.0214687	0.983984	0.0242007	0.970943	0.0810935	0.858535	0.00845981	0.798168
PMM0628	PMED4_06781	possible sodium	11.6703	0.0723158	23.6	0.677611	9	0.50756	14.0 Transport and binding proteins	14.0 Transport and binding proteins	1.19856	0.0999343	0.851662	0.240158	0.942931	0.124182	0.970594	0.489308	0.939643	0.0785834	1.16309	0.013376	1.41251	0.0342269	1.34287	0.170477	1.14716	0.0984489	1.11051	0.0596806	1.19019	0.148574	1.09225	0.193064	0.901564	0.136997	0.587537	0.190656	0.679314	0.0375338	0.687787	0.00326335	0.827749	0.0726176	0.898881	0.0106388	1.21437	0.0588097	0.967648
PMM0629	PMED4_06791	conserved hypothetical protein	14.9258	0.00320911	16.4	0.867383	4	0.762206	16.0 Hypothetical	16.1 Conserved hypothetical protein	0.936039	0.0912649	0.744938	0.151949	0.817036	0.201628	0.91299	0.435098	0.81933	1.08742	1.52537	0.340556	1.23413	0.0593137	1.055	0.0358556	0.846531	0.020161	0.794435	0.0809966	0.88147	0.0111461	0.883206	0.0224201	0.916658	0.109712	1.02288	0.0023856	1.35947	0.206099	1.84887	0.0783538	1.58586	0.0598731	1.57869	0.0331953	1.20648	0.0417327	0.952623
PMM0630	PMED4_06801	GSTTLp28,P28,GSTO1 Glutathione S-transferase N terminus	13.6791	0.0145938	2.4	0.805693	12	0.859174	15.0 Other categories	15.7 Other	1.03338	0.0888878	0.851848	0.199136	0.811028	0.0954058	0.751061	0.140834	0.799553	0.0254036	0.859482	0.081267	0.880394	0.11724	1.07209	0.0380461	1.01559	0.1692	0.965703	0.117197	1.12088	0.000187974	1.11255	0.203395	1.12691	0.0490298	0.835926	0.0610258	0.859923	0.0838706	0.86585	0.135236	0.934097	0.0865904	0.925033	0.0332665	1.05836	0.0780352	1.21665
PMM0631	PMED4_06811	possible NADH-Ubiquinone/plastoquinone (comple	15.5718	0.000447761	16.4	0.904075	4	0.832024	15.0 Other categories	15.7 Other	0.998446	0.180108	0.867122	0.00547007	1.09946	0.00883854	1.0994	0.0596063	0.944859	0.378347	1.25862	0.0527195	1.20046	0.137799	1.10647	0.00370572	0.920524	0.086522	0.827724	0.117584	0.828067	0.035819	0.826989	0.0605355	0.912493	0.139928	0.83904	0.0361296	1.20716	0.077206	1.44305	0.124612	1.22473	0.0932202	1.24754	0.110671	1.19401	0.0105317	0.927509
PMM0632	PMED4_06821	Short-chain dehydrogenase/reductase (SDR)superfamily	12.5207	0.039242	2.2	0.737703	11	0.888667	15.0 Other categories	15.1 Adaptations and atypical conditions	1.5976	0.159221	0.832143	0.193001	0.720115	0.111998	0.501003	0.00688053	0.489523	0.277768	0.967419	0.0202409	1.07047	0.1198	1.11275	0.0790368	1.10098	0.029507	0.998427	0.375409	1.13234	0.126836	1.13609	0.0330575	1.07853	0.106004	0.896405	0.166143	0.773262	0.114484	0.689979	0.0289735	0.833483	0.100757	0.887502	0.0132788	1.04562	0.209952	1.08177
PMM0633	PMED4_06831	crtL2 putative lycopene epsilon cyclase	15.3278	0.00089172	4.4	0.89079	13	0.504099	2.0 Biosynthesis of cofactors, prosthetic groups, and carriers	2.2 Carotenoid	1.57813	0.193691	1.07303	0.0170952	0.800921	0.0324818	0.643199	0.109293	0.493177	0.0597767	0.714172	0.00505494	0.913518	0.153993	1.02215	0.000882976	1.07313	0.12322	1.12127	0.0671706	1.20191	0.0152776	1.41205	0.142768	1.2943	0.260705	0.930923	0.189821	0.802413	0.0765884	0.592021	0.0556005	0.572555	0.000803866	0.635949	0.0916993	0.853978	0.0754203	0.907553
PMM0634	PMED4_06841	por, pcr possible light-dependent protochlorophyllideoxido-reductase	11.5386	0.0776975	4.2	0.671892	15	0.341364	2.0 Biosynthesis of cofactors, prosthetic groups, and carriers	2.3 Cobalamin, heme, phycobilin and porphyrin	1.03199	0.0431909	1.03819	0.057893	0.83554	0.0674043	0.930621	0.289384	0.7604	0.0863844	0.922083	0.0298375	0.986827	0.196162	0.934929	0.00604128	0.899519	0.032393	1.16633	0.295383	1.12478	0.120849	1.04203	0.00924208	1.0354	0.297936	1.11683	0.217193	1.05507	0.00873925	1.01937	0.0739538	0.81319	0.0547811	0.810422	0.0286468	0.997967	0.266135	0.977513
PMM0635	PMED4_06851	small mechanosensitive ion channel, MscS family	16.0788	0.000480769	19.4	0.912512	6	0.812206	15.0 Other categories	15.1 Adaptations and atypical conditions	0.552455	0.0193352	0.519446	0.00279869	0.800961	0.271127	1.00909	0.0559101	1.60707	0.245892	2.62188	0.610326	1.81641	0.207837	1.27928	0.00642699	0.973244	0.0220886	0.883773	0.0262276	0.879562	0.0804724	0.697426	0.143113	0.511743	0.0602859	0.511986	0.0567928	0.900012	0.154756	1.61604	0.256358	2.44598	0.625888	3.02534	0.518693	2.58933	0.0930462	1.85503
PMM0636	PMED4_06861	Isochorismatase hydrolase family	14.2854	0.00711365	2.6	0.840934	12	0.745866	15.0 Other categories	15.7 Other	1.16444	0.194529	0.876295	0.084433	0.799041	0.130756	0.515987	0.0246998	0.619801	0.202879	0.744457	0.053618	0.983332	0.237337	1.00374	0.0284706	1.1892	0.267719	1.17232	0.0361994	1.55787	0.267361	0.995812	0.397819	1.05491	0.12228	0.91815	0.0847509	0.924186	0.0554599	0.842611	0.0558013	0.77774	0.0121793	0.798348	0.138562	1.21977	0.0725147	1.06952
PMM0637	PMED4_06871	fur Ferric uptake regulator family	15.361	0.000912647	18.8	0.873887	6	0.59974	10.0 Regulatory functions	10.0 Regulatory functions	1.15887	0.0887596	0.803043	0.074848	0.646369	0.234706	0.921701	0.344729	0.853601	0.599139	1.86725	0.0275725	2.11377	0.133118	1.52327	0.11304	0.980775	0.0251351	0.840802	0.00704084	0.885005	0.033113	0.839525	0.0745931	0.810367	0.259847	0.845019	0.0626015	0.959247	0.0582485	1.23992	0.194259	1.55019	0.00283457	1.77986	0.0372886	1.61946	0.0307176	1.16948
PMM0638	PMED4_06881	conserved hypothetical protein	11.8211	0.0664	21.6	0.673577	8	0.874071	16.0 Hypothetical	16.1 Conserved hypothetical protein	0.720646	0.260608	0.540749	0.115639	0.763512	0.122019	0.760796	0.467034	0.619941	0.22857	1.29478	0.104688	1.00672	0.591779	1.16113	0.00738924	0.915381	0.204618	0.991771	0.0941097	0.9606	0.0406119	0.935416	0.10213	0.737423	0.184372	0.801995	0.172502	0.999671	0.129054	1.36	0.221391	1.346	0.192981	1.40602	0.0813844	1.2808	0.303508	1.35363
PMM0639	PMED4_06891	stpA putative glucosylglycerolphosphate phosphatase	13.2116	0.0214332	2.4	0.778152	12	0.774976	10.0 Regulatory functions	10.0 Regulatory functions	0.997762	0.276553	0.706802	0.196074	0.756532	0.102458	0.547193	0.0448107	0.555244	0.213967	0.783752	0.0690217	0.877751	0.204171	0.928064	0.149703	0.936916	0.152651	1.08648	0.168244	1.12409	0.0696897	1.10897	0.106946	0.965469	0.125949	0.848906	0.0533422	0.880806	0.128619	0.852785	0.0688077	0.895442	0.174197	0.992597	0.0700716	1.01619	0.227533	1.07821
PMM0640	PMED4_06901	conserved hypothetical protein	13.7716	0.0129009	19.4	0.781157	7	0.510811	16.0 Hypothetical	16.1 Conserved hypothetical protein	1.01816	0.0809673	0.783604	0.206964	0.961378	0.15945	1.05323	0.371909	1.08917	0.0166987	1.39565	0.0889434	1.32911	0.229323	1.01408	0.126171	0.866097	0.158571	0.999187	0.0132394	0.984817	0.00928977	0.935087	0.0716131	0.807822	0.173802	0.726141	0.123374	0.975495	0.00570929	1.11339	0.074825	1.25765	0.118689	1.32798	0.189194	1.47713	0.103932	1.04867
PMM0641	PMED4_06911	conserved hypothetical protein	13.652	0.0149148	1.4	0.803667	11	0.487524	16.0 Hypothetical	16.1 Conserved hypothetical protein	0.891574	0.0785422	0.746971	0.126491	0.476853	0.0907281	0.512484	0.0886399	0.485553	0.277587	1.06408	0.00237624	1.06249	0.249736	1.12873	0.0250816	1.11839	0.102543	1.08307	0.0889068	1.34787	0.128886	1.27585	0.0891389	0.962076	0.207572	0.92923	0.104333	0.752788	0.086453	0.787204	0.145988	0.72418	0.133512	0.960558	0.0468405	1.10331	0.00388005	1.10405
PMM0642	PMED4_06921	cysD putative O-Acetyl homoserine sulfhydrylase	12.9616	0.0266417	13	0.761717	3	0.979665	1.0 Amino acid biosynthesis	1.5 Serine family / Sulfur assimilation	1.15922	0.0301125	1.23404	0.127943	1.43029	0.290245	1.46753	0.427666	1.36452	0.0996144	1.21697	0.130883	0.901404	0.0368625	0.817658	0.0277378	0.760916	0.142835	0.908693	0.101375	1.03483	0.0654741	1.07597	0.0958585	0.965312	0.137922	0.896463	0.183414	1.08854	0.0962298	1.1523	0.141891	1.08936	0.0948497	1.10318	0.10245	0.910811	0.0867474	0.764144
PMM0643	PMED4_06931	metA putative homoserine O-succinyltransferase	0.818576	0.989244	11.2	0.0473703	17	1	1.0 Amino acid biosynthesis	1.2 Aspartate family	1.31425	0.0967193	1.07263	0.230993	1.10844	0.363562	1.32778	0.638657	1.15506	0.245308	1.19089	0.00142938	1.0885	0.158455	0.881293	0.115241	0.895124	0.264084	1.01697	0.0179411	1.13197	0.0214236	1.14618	0.248287	0.967606	0.205554	0.834619	0.287884	0.896433	0.109903	1.06697	0.0530443	0.929659	0.043722	0.979712	0.0447882	0.952692	0.175805	0.928871
PMM0644	PMED4_06941	putative sulfate transporter	16.5504	0	5.6	0.950175	16	0.998043	10.0 Regulatory functions	10.0 Regulatory functions	1.88474	0.240249	1.47535	0.016478	1.14726	0.214785	0.740016	0.250917	0.625095	0.0671946	0.577426	0.0647691	0.800195	0.0491571	0.879278	0.0462948	0.975537	0.0202456	1.26544	0.0934168	1.40711	0.082796	1.54166	0.0411584	1.55337	0.0236804	1.13931	0.17668	0.930888	0.00927449	0.625274	0.0237052	0.541666	0.0514057	0.587393	0.00247882	0.694585	0.000553641	0.773277
PMM0645	PMED4_06951	FAD linked oxidase, N-terminal	10.7724	0.118208	23.2	0.623491	18	1	15.0 Other categories	15.7 Other	1.02406	0.119029	0.613288	0.053674	0.691621	0.138594	0.640846	0.0783695	0.786226	0.225788	0.888631	0.0203169	1.05345	0.055797	1.2612	0.257602	1.04586	0.26138	0.983862	0.398497	0.915992	0.259909	0.853832	0.0158141	0.962048	0.229344	0.740725	0.104249	1.02949	0.325761	1.03922	0.10966	1.12581	0.00769128	1.05848	0.0754195	1.17301	0.133689	1.2193
PMM0646	PMED4_06961	conserved hypothetical protein	14.7057	0.00432738	18.6	0.837808	6	0.737755	16.0 Hypothetical	16.1 Conserved hypothetical protein	0.925128	0.0807192	0.637312	0.0983817	0.924179	0.105068	0.949491	0.0944483	1.11601	0.173482	1.20804	0.0332873	1.38735	0.205146	1.23602	0.046143	0.951836	0.043754	0.833112	0.0667062	0.921374	0.162808	0.783373	0.043919	0.933335	0.00949623	0.80696	0.0126144	1.06125	0.028709	1.15313	0.127459	1.4337	0.0382637	1.19037	0.0698512	1.32885	0.0342777	1.07952
PMM0647	PMED4_06971	conserved hypothetical protein	16.4354	0	16.2	0.956777	4	0.970203	16.0 Hypothetical	16.1 Conserved hypothetical protein	0.676273	0.10766	1.07101	0.429418	1.51622	0.116337	1.6581	0.431296	1.30686	0.911313	2.66236	0.31461	1.49516	0.489152	1.08783	0.133333	0.655128	0.0165561	0.467811	0.137668	0.531893	0.167625	0.522526	0.01417	0.543698	0.0280389	1.18706	0.178025	2.70969	0.0336488	3.16601	1.17865	2.45001	0.115803	2.70278	0.330277	1.9483	0.235716	0.991668
PMM0648	PMED4_06981	Glucose-methanol-choline (GMC) oxidoreductase	16.4007	0.000377358	3.8	0.958309	13	0.639625	15.0 Other categories	15.7 Other	1.3725	0.0227431	0.806844	0.186163	0.849683	0.165175	0.56275	0.127132	0.539224	0.0293835	0.511272	0.0711895	0.776455	0.0581137	0.978515	0.0661255	1.27744	0.0359085	1.39482	0.00596582	1.40599	0.193036	1.2627	0.118023	1.27637	0.0893488	0.931401	0.0539022	0.823221	0.0906236	0.666024	0.0605183	0.514408	0.168678	0.575048	0.0153835	0.868005	0.00560552	1.06576
PMM0649	PMED4_06991	Pentapeptide repeats	16.6739	0	4.8	0.964868	15	0.827494	15.0 Other categories	15.7 Other	1.36324	0.0715475	1.04675	0.0993267	0.91056	0.148434	0.615479	0.0944518	0.480316	0.0266059	0.545503	0.0241149	0.676525	0.0319967	0.790718	0.125704	1.03536	0.0933019	1.27386	0.00415982	1.49348	0.108863	1.42506	0.104834	1.3004	0.160092	1.05161	0.235619	0.985847	0.100394	0.756745	0.0409014	0.609856	0.0908357	0.553819	0.0158248	0.747733	0.039599	0.928793
PMM0650	PMED4_07001	possible LEM domain	15.92	0.0004158	22	0.909794	9	0.906515	10.0 Regulatory functions	10.0 Regulatory functions	0.88698	0.241253	0.55581	0.0735917	0.579829	0.0368494	0.582564	0.0153924	0.924104	0.128384	2.22606	0.557069	2.05027	0.791992	2.51598	0.657266	1.28525	0.0648053	1.01695	0.0277875	1.06933	0.0977956	0.769136	0.00218848	0.779148	0.190423	0.560503	0.0193037	0.597125	0.0674592	0.634665	0.0638604	1.04815	0.00110079	1.91598	0.278382	2.43524	0.208224	2.1819
PMM0651	PMED4_07011	possible VHS domain	16.146	0.000516796	22	0.923995	9	0.847166	10.0 Regulatory functions	10.0 Regulatory functions	0.603939	0.0249679	0.425515	0.024743	0.262264	0.0558238	0.254528	0.108534	0.76716	0.414194	2.50381	0.26033	3.24405	1.36993	3.13744	0.579507	2.19929	0.00211785	1.27599	0.124307	0.976659	0.0257109	1.01807	0.0186143	0.603445	0.022612	0.587723	0.0887487	0.521423	0.055168	0.542931	0.190574	1.4735	0.0334836	2.95103	0.0128903	3.09085	0.292859	3.10746
PMM0652	PMED4_07021	possible 5'-3' exonuclease, C-terminal SAM fol	16.397	0.000373134	22.4	0.941572	9	0.885667	12.0 Transcription	12.2 RNA synthesis, modification, and DNA transcription	0.767487	0.312851	0.531366	0.113678	0.556115	0.194144	0.501663	0.252764	0.581212	0.163224	1.18742	0.221364	3.08714	0.86123	2.98516	0.236673	1.94769	0.650874	1.5616	0.156126	1.29134	0.11365	1.04982	0.15607	0.598872	0.0417986	0.551475	0.05202	0.638243	0.0407929	0.830345	0.0202827	0.970703	0.194945	1.35369	0.27291	2.50804	0.37602	3.13243
PMM0653	PMED4_07041	gloA Glyoxalase/Bleomycin resistanceprotein/Dioxygenase superfami...	14.1555	0.00843184	9.4	0.806439	1	0.609953	15.0 Other categories	15.7 Other	1.20038	0.0199707	1.22895	0.21456	1.27733	0.327951	1.02705	0.177758	0.704101	0.583218	0.90327	0.182961	0.787443	0.0919876	0.858324	0.0363844	0.872053	0.0455488	0.916831	0.160303	1.11734	0.152524	1.1907	0.165707	1.41686	0.021555	1.13224	0.0663291	1.11964	0.00162518	0.992871	0.0286059	0.955158	0.0129576	0.680801	0.0372349	0.854201	0.0173115	0.770075
PMM0654	PMED4_07051	conserved hypothetical protein	12.1622	0.053427	21.4	0.692135	9	0.706585	16.0 Hypothetical	16.1 Conserved hypothetical protein	0.965993	0.158488	0.726031	0.0890122	0.853636	0.0189207	1.03475	0.434152	0.900435	0.217755	1.05283	0.0079053	1.3081	0.0569218	1.24413	0.00830847	0.989086	0.0377808	0.866605	0.0842302	1.00944	0.189494	0.873772	0.175258	0.964497	0.213155	0.832221	0.203102	0.884084	0.0801974	0.818796	0.104298	1.11622	0.354344	1.09925	0.00510839	1.23094	0.369445	1.08213
PMM0655	PMED4_07061	hypothetical	15.7497	0.000347222	20	0.893021	7	0.840639	16.0 Hypothetical	16.2 No similarity	0.866482	0.00974709	0.736789	0.202937	1.03183	0.0627284	0.897393	0.14846	1.07928	0.240662	1.74945	0.185195	2.07145	0.612607	1.7439	0.0297433	1.11986	0.122772	0.879924	0.151891	0.821321	0.222469	0.642589	0.106233	0.908747	0.119731	0.736266	0.103507	0.969828	0.0460451	1.22127	0.189429	1.19844	0.56336	1.64946	0.315534	1.95954	0.0919385	1.69684
PMM0656	PMED4_07071	possible 7TM chemoreceptor	16.0918	0.00049505	19.8	0.912316	7	0.890489	15.0 Other categories	15.7 Other	0.704572	0.215892	0.642074	0.0352887	0.879532	0.380345	0.982148	0.38936	1.3441	0.615351	1.98348	0.110699	2.026	0.238708	1.86592	0.0857879	1.26644	0.0113538	0.737131	0.0569566	0.821975	0.247882	0.471919	0.0306067	0.652949	0.101876	0.561143	0.106913	0.870209	0.0411908	1.10763	0.0747148	1.20644	0.149887	1.27056	0.30482	1.92022	0.549376	1.44469
PMM0657	PMED4_07101	possible Vanadium/alternative nitrogenase delt	13.6445	0.0148936	21.8	0.778962	8	0.820029	15.0 Other categories	15.7 Other	0.851532	0.00501504	0.54762	0.17461	0.680646	0.128137	0.816122	0.0460748	0.85128	0.0336588	1.06343	0.159933	1.46693	0.208387	1.2711	0.252935	1.03899	0.0261048	0.95513	0.0613808	0.918596	0.111376	0.881649	0.187828	0.791205	0.180551	0.774365	0.141435	0.907424	0.0160085	1.11784	0.175991	1.29378	0.158472	1.14689	0.184218	1.38415	0.40725	1.40402
PMM0658	PMED4_07111	rsuA putative pseudouridylate synthase specific toribosomal small subunit	10.1444	0.15751	3.4	0.594358	18	1	13.0 Translation	13.1 Aminoacyl tRNA synthetases and tRNA modification	1.15097	0.302256	0.813564	0.198282	0.701444	0.0472582	0.599476	0.101344	0.696698	0.117561	0.795683	0.085619	1.04454	0.0338293	0.985423	0.0433692	0.925694	0.0911704	0.962852	0.0507222	0.976093	0.391768	1.00568	0.025127	1.2285	0.307691	1.10913	0.11273	1.09327	0.142435	0.981347	0.147811	0.947974	0.0552162	0.99196	0.0303808	1.11032	0.208771	1.04162
PMM0659	PMED4_07121	NAD-dependent DNA ligase N-terminus	16.1385	0.000512821	18.8	0.918135	6	0.833444	11.0 DNA replication, recombination, and repair	11.0 DNA replication, recombination, and repair	0.745973	0.157352	0.631669	0.0399572	1.00283	0.152557	1.07819	0.306586	1.49066	0.0535455	2.46607	0.590655	2.17318	0.130807	1.4097	0.227094	0.947934	0.032647	0.916484	0.148201	0.932937	0.186354	0.80939	0.0284747	0.699072	0.0149094	0.610561	0.0294662	1.0119	0.0774747	1.49332	0.0495314	1.72465	0.180143	2.37016	0.167021	2.24467	0.297173	1.47427
PMM0660	PMED4_07161	possible RNA recognition motif. (a.k.a. RRM, R	15.8816	0.000390625	22.2	0.909155	8	0.551267	12.0 Transcription	12.1 Degradation of RNA	0.445316	0.0289179	0.289827	0.0397341	0.483249	0.117035	0.632111	0.157639	0.934326	0.089673	1.64633	0.0392897	1.36249	0.508582	1.34777	0.162756	1.18272	0.244931	1.24225	0.0642486	1.14691	0.0496471	0.781547	0.0818512	0.358301	0.0719082	0.269641	0.0759844	0.47794	0.00663694	0.881287	0.159047	1.01622	0.133066	1.49525	0.00888697	1.47695	0.359958	1.54405
PMM0661	PMED4_07171	nrdJ ribonucleotide reductase (Class II)	17.1048	0	17.6	0.982013	5	0.996935	9.0 Purines, pyrimidines, nucleosides, and nucleotides	9.2 Purine ribonucleotide biosynthesis	0.345998	0.0531683	0.517399	0.082656	1.92767	0.13514	2.84761	0.105287	3.03127	0.702712	3.73617	0.167913	2.86976	0.014594	1.70286	0.152806	0.914385	0.111309	0.553078	0.0202881	0.404344	0.0365581	0.322996	0.00714795	0.286256	0.010497	0.445131	0.0261701	1.77406	0.106286	3.16231	0.0916562	3.62747	0.0896199	4.02678	0.344512	3.08056	0.127231	1.84178
PMM0662	PMED4_07181	conserved hypothetical protein	13.0621	0.0246037	20.6	0.741052	8	0.532789	16.0 Hypothetical	16.1 Conserved hypothetical protein	0.946484	0.0611962	0.587798	0.0996042	0.953497	0.0713193	0.70712	0.268014	0.724296	0.446167	1.30088	0.123295	1.24177	0.265696	1.31601	0.0278468	1.02385	0.0634183	0.931657	0.0732381	1.02351	0.175947	0.774248	0.07249	0.748952	0.0698902	0.633941	0.216415	1.03048	0.0522672	1.28376	0.0582582	1.27709	0.274543	1.25979	0.0682676	1.5619	0.0656411	1.18418
PMM0663	PMED4_07191	prfC peptide-chain-release factor RF-3	12.8935	0.0281655	1.6	0.759415	11	0.691798	13.0 Translation	13.5 Protein modification and translation factors	1.14512	0.0143517	0.77623	0.209296	0.801324	0.0830907	0.730637	0.100274	0.668319	0.0477972	0.879232	0.0976798	1.14255	0.183099	1.19887	0.023862	1.03245	0.0510683	1.05763	0.0428817	1.0645	0.0835613	1.06757	0.0961442	1.00372	0.0734159	0.861385	0.0561042	0.996767	0.00197517	0.956316	0.0482382	0.826315	0.0281234	0.891428	0.0280736	1.09411	0.00989495	1.14693
PMM0664	PMED4_07201	conserved hypothetical protein	15.3303	0.000893997	0.2	0.895912	10	0.874669	16.0 Hypothetical	16.1 Conserved hypothetical protein	1.11415	0.0424178	0.745805	0.0963445	0.769278	0.0318573	0.672747	0.0478973	0.614643	0.136397	0.968523	0.0353313	1.27518	0.263414	1.60043	0.0308256	1.31889	0.0662686	1.27768	0.0681822	1.21353	0.140819	0.94143	0.0248893	0.904804	0.114545	0.799036	0.163135	0.869569	0.100184	0.86171	0.0699145	0.925549	0.182712	0.960631	0.0164107	1.20294	0.0350448	1.55855
PMM0665	PMED4_07211	hsp33 Hsp33 protein	8.23931	0.318475	21	0.468075	17	1	15.0 Other categories	15.7 Other	1.28604	0.00452313	0.931815	0.0825056	0.831682	0.138513	0.820497	0.182007	0.865578	0.206019	1.05569	0.0966758	1.27663	0.0274407	1.29987	0.0867382	1.01828	0.133299	0.950877	0.246476	0.963687	0.081	1.00554	0.01089	1.07253	0.0680849	0.846921	0.0593129	1.03805	0.058226	0.950014	0.0410144	0.964943	0.00937335	0.99331	0.0124216	1.15479	0.0958313	1.12558
PMM0666	PMED4_07221	possible ABC transporter, ATP-binding component	15.7033	0.000328407	19.4	0.891176	6	0.595656	14.0 Transport and binding proteins	14.0 Transport and binding proteins	0.656976	0.185261	0.582293	0.171241	0.568348	0.211615	0.541496	0.227247	0.941685	0.433686	1.48934	0.105535	1.48075	0.252831	1.38344	0.171174	1.07666	0.0963543	0.801629	0.243768	0.776112	0.360213	0.606768	0.161882	0.767544	0.0659354	0.662938	0.13752	1.04738	0.0446912	1.38052	0.0973914	1.70725	0.0618291	1.79309	0.156312	1.69003	0.0596712	1.46752
PMM0667	PMED4_07231	conserved hypothetical protein	15.1222	0.00146727	18.6	0.861029	6	0.759369	16.0 Hypothetical	16.1 Conserved hypothetical protein	0.750209	0.10687	0.736855	0.140958	0.883378	0.135488	0.903034	0.0577296	0.745677	0.623736	1.34662	0.162284	1.2833	0.322633	1.1735	0.236281	1.04732	0.086618	0.90389	0.161113	0.878666	0.177422	0.928875	0.0579899	0.956682	0.0298077	0.929581	0.0185796	1.05451	0.118014	1.29127	0.040539	1.29322	0.150525	1.31552	0.183822	1.16658	0.179023	1.29381
PMM0668	PMED4_07241	Conserved hypothetical protein 46	14.3069	0.00706656	20.2	0.810996	7	0.666051	16.0 Hypothetical	16.1 Conserved hypothetical protein	0.830895	0.183544	0.685283	0.167377	1.02304	0.0337045	0.881336	0.287745	0.992743	0.133915	1.25158	0.0755275	1.28965	0.240275	1.25775	0.098978	0.946217	0.195065	0.782863	0.0414813	0.957224	0.0094853	0.910258	0.022819	0.84987	0.194332	0.780595	0.28267	0.933916	0.152135	1.09452	0.0271947	1.04201	0.364328	1.20947	0.286605	1.39711	0.225323	1.2016
PMM0669	PMED4_07251	conserved hypothetical protein	11.4573	0.0801426	18	0.655591	5	0.346012	16.0 Hypothetical	16.1 Conserved hypothetical protein	1.03719	0.140115	1.00154	0.0525915	1.28751	0.196266	1.20342	0.379527	1.32525	0.115109	1.09963	0.145067	1.23239	0.0280387	1.07474	0.274616	1.00427	0.0600968	0.960743	0.176769	1.01704	0.045955	0.976669	0.0297213	0.936553	0.122733	0.876909	0.11219	0.90574	0.0356605	1.03082	0.0375319	1.02223	0.0787524	1.0758	0.181194	1.03206	0.026478	1.03547
PMM0670	PMED4_07261	conserved hypothetical protein	15.3604	0.000910273	2.6	0.904173	12	0.660151	16.0 Hypothetical	16.1 Conserved hypothetical protein	1.19299	0.146031	0.685241	0.0661557	0.667886	0.0706958	0.486013	0.0120957	0.505705	0.0567556	0.704615	0.120468	0.941715	0.167668	1.09075	0.0395254	1.07125	0.0829119	1.10814	0.208672	1.29956	0.203326	1.02737	0.0327048	1.09043	0.0655771	0.768607	0.0665917	0.750856	0.303891	0.642882	0.128895	0.761965	0.109156	0.677133	0.0634641	1.01178	0.018007	1.05018
PMM0671	PMED4_07271	putative phosphonate ABC transporter	14.1974	0.00764331	0.4	0.830435	11	0.482669	14.0 Transport and binding proteins	14.0 Transport and binding proteins	1.06293	0.421484	0.67238	0.0908329	0.679397	0.187209	0.627166	0.00814052	0.77548	0.231738	0.99659	0.0346147	1.04807	0.306532	1.24909	0.01569	1.18324	0.016052	1.09471	0.025609	1.15952	0.242211	0.95711	0.0152821	0.979121	0.069943	0.858738	0.0766862	0.89178	0.20221	0.737475	0.0983331	0.888723	0.287749	1.01485	0.0292391	1.19354	0.0136926	1.09081
PMM0672	PMED4_07281	Putative phosphonate ABC transporter	13.1579	0.0223871	2.2	0.775251	11	0.900877	14.0 Transport and binding proteins	14.0 Transport and binding proteins	1.63688	0.167475	0.754736	0.0396952	0.838674	0.037708	0.598531	0.17516	0.783344	0.113632	0.850593	0.0352245	1.13317	0.0633077	1.19062	0.16981	1.11137	0.015201	1.03549	0.0755658	1.23232	0.135101	1.15779	0.224502	0.980845	0.0601226	0.75151	0.104458	0.763802	0.150584	0.762236	0.125341	0.858147	0.0174154	0.784318	0.077445	1.03901	0.164083	0.971712
PMM0673	PMED4_07291	Putative phosphonate binding protein for ABCtransporter	15.8892	0.00039604	3.4	0.930467	13	0.988502	14.0 Transport and binding proteins	14.0 Transport and binding proteins	1.45672	0.115841	1.02345	0.0406663	0.739115	0.00717957	0.575267	0.0383545	0.433857	0.140578	0.663555	0.00185197	0.860418	0.176671	1.07598	0.112903	1.17668	0.196039	1.223	0.044529	1.42266	0.00690992	1.43209	0.135389	1.10832	0.160853	0.806411	0.289625	0.757278	0.162512	0.643537	0.00467033	0.534027	0.0289835	0.612917	0.0255702	0.874362	0.136068	1.0952
PMM0674	PMED4_07301	aspC Aminotransferases class-I	15.3303	0.000892857	3.6	0.896553	15	0.423833	1.0 Amino acid biosynthesis	1.2 Aspartate family	1.60405	0.101085	0.934978	0.0352047	0.690014	0.0843723	0.568008	0.0555591	0.55439	0.263403	0.639594	0.040745	0.857216	0.202483	1.04822	0.035471	1.14268	0.100454	1.11555	0.0823147	1.27779	0.0385999	1.16181	0.115111	1.03204	0.3471	0.889112	0.130917	0.828122	0.00239238	0.731895	0.0710546	0.630308	0.0882003	0.69107	0.0512643	0.916877	0.242638	0.977386
PMM0675	PMED4_07311	Uracil-DNA glycosylase	12.5476	0.0383803	1	0.737394	11	0.738338	11.0 DNA replication, recombination, and repair	11.0 DNA replication, recombination, and repair	1.28965	0.0689111	0.76999	0.0698635	0.778271	0.0528485	0.802923	0.0686592	0.840544	0.182711	0.934505	0.065787	1.0804	0.188902	1.39589	0.0538663	1.09034	0.0457615	1.16101	0.130456	1.23604	0.187086	0.980262	0.114456	1.32528	0.0504747	0.82674	0.0238426	0.802163	0.179147	0.894283	0.0642837	0.930952	0.0162677	0.880883	0.0833647	1.28365	0.0259073	1.14275
PMM0676	PMED4_07321	gcpE GcpE protein	15.502	0.000707214	3.4	0.907552	12	0.836054	15.0 Other categories	15.7 Other	1.20705	0.104741	0.726505	0.0948985	0.583168	0.109435	0.515307	0.0856903	0.483424	0.0654023	0.655938	0.0140078	0.842963	0.159637	1.08357	0.00565572	1.08365	0.0669245	1.11762	0.115306	1.11776	0.0156324	1.26838	0.0600069	1.12449	0.10105	0.935679	0.0228822	0.831529	0.00294783	0.751102	0.0678337	0.688022	0.0867318	0.704908	0.0744817	0.824688	0.0334944	0.961942
PMM0677	PMED4_07331	carboxyl-terminal processing protease	14.5712	0.00523979	1.8	0.858174	11	0.756735	13.0 Translation	13.3 Degradation of proteins, peptides, and glycopeptides	1.13843	0.214498	0.749692	0.0879048	0.618542	0.0756766	0.634972	0.0836017	0.482424	0.208305	0.819752	0.010148	1.04376	0.275534	1.25006	0.171862	1.16274	0.0103938	1.07344	0.0358822	1.14466	0.179068	1.18537	0.0838879	1.08698	0.150818	0.844063	0.15695	0.823059	0.118927	0.827812	0.0255555	0.780231	0.0718447	1.00366	0.0287978	1.02446	0.225725	1.23736
PMM0678	PMED4_07341	Quinolinate synthetase A protein	9.73506	0.186985	23	0.561403	17	1	7.0 Fatty acid, phospholipid and sterol metabolism	7.0 Fatty acid, phospholipid and sterol metabolism	0.942374	0.0578967	0.759678	0.161624	0.985613	0.0980693	0.992112	0.163847	0.91843	0.124826	0.966599	0.0504596	1.10707	0.0849789	1.04567	0.0373418	1.04314	0.040487	1.02773	0.0942879	1.01317	0.0825722	1.09893	0.186844	0.996253	0.0956558	0.918067	0.0783764	1.05357	0.112715	1.09001	0.0045941	0.966847	0.0892463	0.909537	0.00715965	1.05413	0.108771	1.06133
PMM0679	PMED4_07351	putative transcripton factor	15.8957	0.000401606	4.4	0.923793	15	0.974621	10.0 Regulatory functions	10.0 Regulatory functions	1.59767	0.317369	0.9338	0.261498	0.745301	0.020224	0.554118	0.0838078	0.545492	0.17716	0.703534	0.0553053	0.697079	0.00682968	0.972837	0.00431771	1.01765	0.373783	1.35811	0.0555582	1.5667	0.38485	1.53772	0.458603	1.24009	0.380003	1.03232	0.3655	0.963854	0.161432	0.723945	0.0318413	0.741822	0.123738	0.713167	0.11648	1.03134	0.0499461	0.892024
PMM0680	PMED4_07361	conserved hypothetical protein	16.5779	0	8.2	0.940081	1	0.959572	16.0 Hypothetical	16.1 Conserved hypothetical protein	2.69234	0.477047	2.52432	0.398716	1.91586	0.0553056	0.755892	0.0585096	0.669146	0.319481	0.492701	0.0530168	0.570677	0.0308288	0.696026	0.195417	0.802269	0.04334	0.999983	0.00827563	1.49006	0.156437	1.36431	0.330841	2.63913	0.0339971	2.07349	0.267681	1.66841	0.0663869	0.925761	0.0882627	0.748114	0.0695389	0.551347	0.0176409	0.594869	0.0180111	0.575201
PMM0681	PMED4_07371	conserved hypothetical protein	15.3928	0.000802139	19.8	0.872748	7	0.824588	16.0 Hypothetical	16.1 Conserved hypothetical protein	0.824339	0.0601797	0.756936	0.0581024	0.910395	0.0286964	0.977608	0.020959	1.01537	0.0112234	1.24386	0.0194437	1.32039	0.196518	1.26236	0.00415764	1.00794	0.000337849	0.896859	0.110057	0.953559	0.261124	0.897992	0.0644497	0.899802	0.0202455	0.680386	0.121197	0.929513	0.156555	1.0773	0.0103441	1.25066	0.0679122	1.52421	0.155861	1.69062	0.190108	1.30163
PMM0682	PMED4_07381	aroB 3-dehydroquinate synthase	13.9827	0.0102195	0.6	0.819368	10	0.673125	1.0 Amino acid biosynthesis	1.1 Aromatic amino acid family	1.0105	0.144058	0.876297	0.256723	0.668253	0.120633	0.646828	0.0100492	0.521668	0.237706	1.02645	0.0230378	0.99355	0.185736	1.12569	0.0138885	1.14713	0.0250217	1.06985	0.0468945	1.03899	0.127979	0.979864	0.0114688	1.05432	0.101257	0.793355	0.129525	0.830313	0.0320034	0.847598	0.0603889	0.947847	0.125332	1.02453	0.0501231	1.10719	0.0162431	1.16563
PMM0683	PMED4_07391	purK phosphoribosylaminoimidazole carboxylase	14.0895	0.00875969	21.8	0.804025	8	0.683611	9.0 Purines, pyrimidines, nucleosides, and nucleotides	9.2 Purine ribonucleotide biosynthesis	0.989935	0.0674155	0.70655	0.0708487	0.68726	0.101809	0.769766	0.0896998	0.829363	0.156681	1.21933	0.00404156	1.20217	0.0777869	1.34509	0.0292224	1.03783	0.047569	0.922975	0.0367773	1.07019	0.110165	0.85154	0.0274001	0.927664	0.1944	0.770617	0.0851949	0.813527	0.152297	1.0635	0.154852	1.27146	0.191707	1.27135	0.15892	1.3896	0.268745	1.25657
PMM0684	PMED4_07401	possible Zinc finger, C2H2 type	12.9515	0.0268247	18.8	0.736645	6	0.629114	10.0 Regulatory functions	10.0 Regulatory functions	0.732533	0.0106837	0.617315	0.0255814	0.839803	0.0017233	1.14358	0.114495	1.48475	0.168382	1.63397	0.0983273	1.28974	0.0102239	1.05723	0.0107419	0.899574	0.0132079	0.973222	0.0235551	1.00118	0.0465257	0.94668	0.0773927	0.761539	0.0491533	0.634185	0.0107281	0.908209	0.0706307	1.28319	0.055399	1.60045	0.172576	1.61486	0.106672	1.07737	0.140851	1.08537
PMM0686	PMED4_07441	conserved hypothetical protein	14.8496	0.00347222	6	0.849188	16	0.694932	16.0 Hypothetical	16.1 Conserved hypothetical protein	3.03225	0.567198	1.35963	0.388828	1.09334	0.270073	0.949144	0.439145	0.648548	0.0292684	0.724056	0.0944558	0.72377	0.0504448	0.743916	0.0220357	0.909118	0.163812	1.02006	0.0222108	1.50492	0.166979	1.58849	0.412355	1.49471	0.646762	0.904589	0.155065	0.923787	0.0502923	0.742918	0.117112	0.766632	0.188207	0.577041	0.0924404	0.762076	0.107589	0.7705
PMM0687	PMED4_07471	conserved hypothetical	12.0175	0.0583608	16.8	0.695141	4	0.509855	16.0 Hypothetical	16.1 Conserved hypothetical protein	1.12935	0.0813075	0.917468	0.123488	1.12562	0.164647	1.04871	0.0725786	0.939916	0.14808	1.09914	0.00921965	1.09002	0.0137677	1.01572	0.0159134	0.8971	0.0918992	0.93564	0.0375243	0.90216	0.0773223	0.825505	0.0448608	0.90988	0.0376351	0.784096	0.0422815	1.03507	0.0193732	1.12448	0.0381304	1.01849	0.0065248	0.985213	0.0444342	1.01471	0.0190695	0.919244
PMM0688	PMED4_07501	possible Elongation factor Tu domain 2	16.0331	0.00045977	16.8	0.927001	5	0.939976	13.0 Translation	13.5 Protein modification and translation factors	0.914699	0.0283975	0.928817	0.0323124	1.44602	0.0353624	2.04827	0.117471	2.18073	0.530471	3.00687	0.503182	1.68605	0.0112472	1.25707	0.129358	0.843047	0.0370328	0.852307	0.0744727	0.950721	0.0734834	0.892726	0.0405379	0.802989	0.078916	0.824396	0.148157	1.31364	0.0394065	1.96433	0.00586687	2.63275	0.127058	2.67867	0.131519	1.98155	0.0385534	1.09218
PMM0689	PMED4_07541	hli22 possible high light inducible protein	12.5598	0.0381765	1.4	0.739368	11	0.631242	15.0 Other categories	15.1 Adaptations and atypical conditions	1.24594	0.303932	0.71844	0.00282756	0.803863	0.00266445	0.699043	0.162943	0.744007	0.145501	0.898176	0.0628524	0.9572	0.0863861	1.13898	0.120026	1.18257	0.130921	0.967151	0.130155	1.15282	0.17418	0.941062	0.243056	1.12702	0.0831534	0.778982	0.034692	0.796465	0.113487	0.790046	0.101942	0.964035	0.0221958	0.81567	0.078649	1.06879	0.0167892	1.22942
PMM0690	PMED4_07551	hli21 possible high light inducible protein	4.16014	0.744556	0.6	0.243701	17	1	15.0 Other categories	15.1 Adaptations and atypical conditions	2.11471	0.620815	0.953755	0.082226	0.897592	0.156043	0.801128	0.099723	0.86794	0.0760214	1.00992	0.00924622	0.969029	0.167356	1.024	0.0466267	0.961238	0.160939	0.87724	0.0534283	1.02927	0.0406247	0.784704	0.143727	1.07852	0.103857	0.742969	0.156247	0.913931	0.0430842	1.04135	0.150676	1.17052	0.361254	1.03092	0.172018	1.17995	0.00395188	1.21502
PMM0691	PMED4_07581	conserved hypothetical protein	14.7601	0.00410697	9.8	0.842228	1	0.85481	16.0 Hypothetical	16.1 Conserved hypothetical protein	2.15817	0.23782	2.53819	0.40773	2.28634	0.565162	1.2881	0.483195	0.592439	0.329432	0.750748	0.0353702	0.884258	0.0418341	0.922043	0.0612162	0.858412	0.0446685	0.95454	0.0419839	1.15082	0.116789	1.34216	0.0148176	1.54124	0.233456	2.04182	0.206148	2.07177	0.191237	1.4195	0.0471227	0.725432	0.130278	0.590559	0.013403	0.796598	0.0857732	0.798448
PMM0692	PMED4_07591	possible DDT domain	14.5172	0.00565217	3	0.853118	12	0.980933	10.0 Regulatory functions	10.0 Regulatory functions	1.11467	0.10596	0.728309	0.104803	0.621276	0.080126	0.477052	0.0270255	0.514522	0.0767531	0.667144	0.084722	0.882342	0.292395	1.17485	0.291748	1.09793	0.00427505	1.05299	0.164405	1.12697	0.101304	1.15736	0.0446614	1.22073	0.336265	0.926065	0.138539	0.891118	0.0891429	0.792585	0.124378	0.703833	0.0333965	0.686539	0.0602005	0.982612	0.0770504	1.07511
PMM0693	PMED4_07621	possible Hepatitis C virus envelope glycoprote	12.5511	0.0384254	22.8	0.723593	9	0.601544	15.0 Other categories	15.7 Other	0.869208	0.324467	0.430058	0.118554	0.364442	0.108105	0.457807	0.0740819	0.499499	0.290705	1.04442	0.182224	1.26995	0.391616	1.37897	0.357239	1.08386	0.293996	0.934487	0.0991607	1.00077	0.0219304	1.0272	0.0366542	1.00447	0.400088	0.569826	0.202793	0.937276	0.0838841	1.02482	0.0130444	1.09685	0.176805	1.0913	0.157161	1.36688	0.341791	1.2367
PMM0694	PMED4_07631	Short-chain dehydrogenase/reductase (SDR)superfamily	16.0001	0.000447427	4	0.932326	15	0.812708	15.0 Other categories	15.1 Adaptations and atypical conditions	1.33237	0.200037	0.828158	0.091896	0.986872	0.116568	0.584621	0.200659	0.521701	0.0531771	0.560991	0.0818541	0.802431	0.124578	1.05565	0.0609061	1.25859	0.0652758	1.40986	0.0693317	1.61248	0.154299	1.52681	0.0706481	1.2128	0.120739	0.936503	0.0157488	0.950796	0.049625	0.793469	0.171339	0.624198	0.0403572	0.527696	0.0290947	0.881725	0.124039	0.848583
PMM0695	PMED4_07641	Glutamine amidotransferase class-I	10.0949	0.160706	20.2	0.572448	17	1	15.0 Other categories	15.7 Other	1.0846	0.076505	0.762167	0.0282828	1.03216	0.165995	1.01186	0.314844	1.18244	0.331684	1.06193	0.0151176	1.12983	0.0558526	1.01641	0.0601407	0.944194	0.132524	0.825755	0.197958	0.846799	0.287259	0.78247	0.0259318	1.02436	0.225303	0.823363	0.0927253	0.844612	0.209914	0.921712	0.101023	1.05831	0.0586221	1.01755	0.0486808	1.20601	0.122984	1.02103
PMM0696	PMED4_07651	hypothetical	13.66	0.0148254	6.4	0.77867	16	0.508329	16.0 Hypothetical	16.2 No similarity	1.30922	0.417987	1.3092	0.0880856	0.971117	0.220417	0.806161	0.0906063	0.747862	0.271371	0.789275	0.0685663	0.790566	0.0804796	0.988043	0.0632954	1.10702	0.16656	0.993372	0.16303	1.4594	0.129138	1.29628	0.236038	1.61932	0.762373	0.915597	0.209269	1.10465	0.162795	0.855129	0.0694224	0.863916	0.155216	0.690562	0.0486722	0.945499	0.0594849	0.968973
PMM0697	PMED4_07661	possible D12 class N6 adenine-specific DNA met	16.2471	0.000286533	6.8	0.924403	16	0.647363	11.0 DNA replication, recombination, and repair	11.0 DNA replication, recombination, and repair	1.25348	0.104724	1.1755	0.167188	1.00629	0.0251427	0.765092	0.111657	0.567532	0.029056	0.579485	0.0367698	0.671713	0.177424	0.902346	0.136808	0.916091	0.00872032	1.00262	0.0420523	1.16151	0.017087	1.22905	0.0016804	1.5392	0.379802	1.43069	0.147989	1.1915	0.107005	0.964766	0.0437007	0.776348	0.0435687	0.596721	0.0151592	0.659639	0.0951455	0.79684
PMM0698	PMED4_07681	possible DnaJ central domain (4 repeats)	7.14437	0.427142	15.8	0.416945	17	1	4.0 Cellular processes	4.3 Chaperones	1.1117	0.135323	0.912363	0.114252	0.955808	0.229608	0.794679	0.0570349	0.583172	0.311261	1.16556	0.144412	1.18086	0.103861	1.11212	0.16896	0.850591	0.0762457	0.879598	0.0708228	0.997871	0.0720659	0.935983	0.13169	1.18436	0.425947	1.00503	0.223813	1.16698	0.121762	1.18715	0.112917	1.23378	0.328204	1.11218	0.0588065	1.23836	0.0956808	1.01802
PMM0699	PMED4_07701	conserved hypothetical	3.5888	0.8	7.4	0.203668	18	1	16.0 Hypothetical	16.1 Conserved hypothetical protein	1.21655	0.00220723	0.922134	0.0809235	0.916364	0.0660762	0.825677	0.154258	0.786173	0.172119	0.863425	0.0688185	1.21807	0.0423077	1.18174	0.119246	0.801812	0.0145485	0.921788	0.0939744	0.96866	0.0243377	1.02602	0.103274	1.48045	0.348664	1.0805	0.335198	1.46846	0.549879	1.24166	0.5405	1.08559	0.569549	1.04353	0.375074	1.30076	0.265721	1.04388
PMM0700	PMED4_07711	conserved hypothetical protein	1.49067	0.962437	21.6	0.0850016	18	1	16.0 Hypothetical	16.1 Conserved hypothetical protein	1.18103	0.0440651	0.886878	0.178582	0.797187	0.127458	0.814028	0.299673	0.667362	0.0420794	0.962465	0.0893552	1.06255	0.154322	1.0562	0.0852276	0.86724	0.307475	0.802922	0.00150709	1.03389	0.244825	0.93181	0.200181	1.09819	0.417177	0.928616	0.00711513	1.07792	0.199031	1.13734	0.294167	1.22748	0.232359	1.10341	0.170404	1.28756	0.455388	1.20184
PMM0701	PMED4_07731	possible LysM domain	16.7152	0	5	0.96496	16	0.916333	10.0 Regulatory functions	10.0 Regulatory functions	1.62871	0.158649	1.18674	0.00659785	1.00279	0.150661	0.732342	0.289244	0.708317	0.154877	0.623976	0.0227241	0.829892	0.0403641	0.942778	0.0492753	1.1476	0.205565	1.3494	0.20999	1.8305	0.0701164	1.80329	0.400701	1.4308	0.263121	0.964096	0.183179	0.896823	0.0256917	0.766481	0.0787702	0.559788	0.011419	0.522002	0.0490337	0.747234	0.0056551	0.783281
PMM0702	PMED4_07741	possible DUP family	13.9223	0.0106876	1	0.817755	10	0.961138	15.0 Other categories	15.7 Other	0.678287	0.0765402	0.551373	0.193772	0.616856	0.069434	0.426829	0.0784963	0.514702	0.143816	0.815849	0.107676	0.91656	0.393125	1.40943	0.173673	1.14968	0.00295207	1.14686	0.114839	1.30353	0.143551	0.980903	0.0713628	0.948107	0.2499	0.81763	0.0160568	0.835402	0.0776758	0.915792	0.0762802	0.875996	0.22722	0.849469	0.11894	1.04861	0.206343	1.63191
PMM0703	PMED4_07761	conserved hypothetical protein	16.409	0.000383142	8.6	0.931169	2	0.625076	16.0 Hypothetical	16.1 Conserved hypothetical protein	2.26757	0.337425	1.69467	0.171624	1.45945	0.438129	0.71372	0.194711	0.797649	0.105951	0.545829	0.0608394	0.695078	0.0117191	0.766837	0.0976964	0.757197	0.132911	0.821942	0.101328	1.26604	0.129569	1.21644	0.0176568	2.69433	0.422431	2.02429	0.0866009	1.57754	0.222937	0.94262	0.124807	0.958776	0.0487377	0.598778	0.150478	0.621451	0.0145902	0.649567
PMM0704	PMED4_07781	putative potassium channel, VIC family	16.6295	0	17.8	0.951917	5	0.99038	10.0 Regulatory functions	10.0 Regulatory functions	0.644183	0.0298457	0.537345	0.00397471	1.25292	0.101198	1.53044	0.085417	1.2829	0.905701	2.03476	0.213967	1.72053	0.0942926	1.52325	0.458574	0.881202	0.122959	0.756424	0.111722	0.721215	0.180825	0.606351	0.0483199	0.505259	0.0108815	0.505353	0.0348396	1.09473	0.0347359	1.85026	0.086966	1.78344	0.0963192	1.64612	0.200516	1.70633	0.130977	1.17387
PMM0705	PMED4_07791	phoB two-component response regulator, phosphate	14.6525	0.00457038	19.2	0.83215	6	0.804962	10.0 Regulatory functions	10.0 Regulatory functions	0.831873	0.333338	0.674076	0.256738	0.861532	0.0768631	0.676849	0.269636	0.812642	0.401674	1.45369	0.467877	1.16681	0.474586	1.24112	0.224272	0.925156	0.183139	0.841699	0.0280591	0.999931	0.0165799	0.990757	0.227209	0.683872	0.446917	0.668102	0.174255	0.960907	0.152131	1.43377	0.00628319	1.33246	0.235827	1.4943	0.321798	1.48021	0.172288	1.16985
PMM0706	PMED4_07801	phoR two-component sensor histidine kinase, phosphatesensing	7.99917	0.342593	21.8	0.456848	18	1	10.0 Regulatory functions	10.0 Regulatory functions	1.19125	0.0367838	0.823856	0.0582343	0.988675	0.0185396	0.935325	0.142055	0.850892	0.154165	1.06775	0.0357965	1.01776	0.119057	1.1163	0.0286005	0.961066	0.0718651	0.87755	0.00328838	0.983619	0.0203738	0.953607	0.0136022	1.00403	0.0697888	0.742539	0.059225	0.941368	0.0985661	1.06252	0.0561064	1.03033	0.0502645	1.09741	0.048904	1.11514	0.237449	1.00146
PMM0707	PMED4_07811	possible Lipoprotein	12.8006	0.0308958	20.8	0.726906	8	0.682363	15.0 Other categories	15.7 Other	0.924462	0.153664	0.749112	0.159255	0.84213	0.0429581	0.759736	0.124094	0.871093	0.124417	1.08572	0.234979	1.30103	0.14096	1.24293	0.062154	1.14316	0.0137069	1.00776	0.0284632	0.922996	0.0504588	0.806751	0.0213721	0.945843	0.0543244	0.914107	0.132412	1.03108	0.0819569	1.19954	0.213203	1.19778	0.0903641	1.15525	0.0512152	1.38266	0.0745824	1.27685
PMM0708	PMED4_07821	putative secreted protein	14.8051	0.00380117	21.8	0.844706	8	0.529578	10.0 Regulatory functions	10.0 Regulatory functions	0.802787	0.0336541	0.706405	0.133948	0.917991	0.125467	0.913612	0.339322	0.931285	0.0359376	1.01606	0.00233966	1.16016	0.257965	1.397	0.286002	1.13341	0.0561489	0.995001	0.0107207	1.00213	0.122423	0.762134	0.157077	0.894004	0.099736	0.831602	0.12259	0.993093	0.0193845	1.04897	0.0748883	1.05913	0.00710981	1.1687	0.0861221	1.26514	0.0374483	1.54208
PMM0709	PMED4_07831	som possible porin	16.064	0.000475059	21.6	0.916449	9	0.90692	3.0 Cell envelope	3.1 Membranes, lipoproteins and porins	0.928167	0.0841894	0.637226	0.0107438	0.828017	0.110453	0.881042	0.458262	1.20254	0.334643	1.24774	0.212643	1.91822	0.179004	1.87059	0.422418	1.37984	0.149837	1.07568	0.0431326	0.989342	0.0646602	0.82008	0.062581	0.779596	0.0275792	0.611789	0.0088119	0.690723	0.0535909	0.805999	0.0912581	1.16929	0.103073	1.46621	0.142797	1.66619	0.0137199	1.70538
PMM0710	PMED4_07841	ABC transporter, substrate binding protein,phosphate	12.8223	0.0302752	3.6	0.749582	13	0.672067	14.0 Transport and binding proteins	14.0 Transport and binding proteins	1.22371	0.042093	1.15865	0.0172142	1.03247	0.200158	0.731435	0.125154	0.636901	0.0249332	0.872217	0.0695985	1.03597	0.0157964	1.00143	0.0184846	0.919354	0.135174	1.10956	0.076525	1.09171	0.0433404	1.02485	0.0238748	0.979224	0.0448761	0.938605	0.0900806	0.917071	0.0346714	0.743252	0.00681512	0.641562	0.0143008	0.90712	0.00242429	1.00373	0.0798887	0.939745
PMM0711	PMED4_07851	putative chromate transporter, CHR family	7.02364	0.439033	1.4	0.413446	18	1	14.0 Transport and binding proteins	14.0 Transport and binding proteins	1.20217	0.0134561	0.838379	0.00673961	0.93804	0.0231753	1.01044	0.191613	0.830867	0.0304373	0.85157	0.0462654	1.07093	0.0398301	1.06304	0.185746	1.26722	0.523571	0.871584	0.0427942	1.24631	0.647546	0.935784	0.157798	1.25552	0.165314	0.806566	0.0935162	1.19905	0.513166	1.01516	0.240913	1.05582	0.596782	1.1059	0.0263652	1.16609	0.228857	1.02782
PMM0712	PMED4_07861	multidrug efflux transporter, MFS family	11.1673	0.0952756	0.6	0.65455	11	0.657242	14.0 Transport and binding proteins	14.0 Transport and binding proteins	1.18235	0.0955647	0.826226	0.00682622	0.91701	0.105972	0.889526	0.171305	0.814335	0.13632	0.967074	0.059908	1.19934	0.0704697	1.16604	0.17779	0.927357	0.0410472	0.948717	0.0397585	1.08281	0.19805	1.08725	0.134563	1.04626	0.0258709	0.776407	0.102536	0.95543	0.066444	0.877585	0.084101	0.910361	0.141159	0.939169	0.161268	1.18609	0.12434	1.11015
PMM0713	PMED4_07871	gap1 Putative glyceraldehyde 3-phosphatedehydrogenase	7.32272	0.408406	1.2	0.430368	17	1	15.0 Other categories	15.7 Other	0.798599	0.150909	0.779307	0.0239928	0.774488	0.0350603	0.623924	0.0436825	0.797457	0.172533	0.92367	0.0717033	0.852572	0.133774	0.927113	0.00361023	0.866427	0.0305419	0.917837	0.0496731	1.08463	0.00490464	1.08002	0.0804268	0.942746	0.0896898	0.869287	0.158076	0.990714	0.137671	1.10473	0.0238616	1.06358	0.0328416	1.16624	0.0629125	1.11222	0.0820614	1.07449
PMM0714	PMED4_07881	Bacterial regulatory proteins, ArsR family	12.6432	0.0348395	22	0.723573	8	0.747935	10.0 Regulatory functions	10.0 Regulatory functions	0.868684	0.12419	0.545197	0.0980817	0.535059	0.00981288	0.455755	0.189333	0.537568	0.325747	1.01735	0.0176071	1.21101	0.0744687	1.23974	0.0860255	1.00863	0.13837	0.95591	0.12173	0.841348	0.0988776	0.810573	0.0292406	0.877576	0.0973964	0.759522	0.0189132	1.00224	0.154487	1.09654	0.12992	1.25409	0.169772	1.34023	0.220767	1.23871	0.0321944	1.37328
PMM0715	PMED4_07901	possible chorismate binding enzyme	14.8287	0.00373648	20.2	0.840876	8	0.607814	1.0 Amino acid biosynthesis	1.1 Aromatic amino acid family	0.422467	0.0755919	0.401049	0.053475	0.594991	0.179574	0.621053	0.162475	0.619803	0.654138	1.31685	0.287009	1.2952	0.425206	1.41037	0.268262	1.15064	0.24321	1.0145	0.148086	0.866359	0.00967333	0.745188	0.0913083	0.577373	0.133346	0.482295	0.161719	1.03997	0.0467	1.77806	0.176318	1.65525	0.0302186	1.60621	0.292265	1.56398	0.168994	1.71197
PMM0716	PMED4_07911	putative arsenite transporter, ACR3 family	13.0863	0.0241094	2.4	0.770756	11	0.682857	10.0 Regulatory functions	10.0 Regulatory functions	1.26532	0.229767	0.749671	0.200834	1.11669	0.629041	0.916458	0.50742	0.723148	0.00151396	0.942265	0.109595	0.976361	0.0809692	1.21069	0.0537237	0.958074	0.163004	0.989945	0.0122136	1.17725	0.0491135	1.08963	0.202728	0.967843	0.203901	0.854579	0.0164124	0.972285	0.144018	0.777028	0.0338068	0.768775	0.149556	0.763438	0.144861	1.08048	0.0101335	0.934321
PMM0717	PMED4_07921	conserved hypothetical protein	13.8466	0.0118209	4.6	0.802869	13	0.403448	16.0 Hypothetical	16.1 Conserved hypothetical protein	1.29447	0.257015	0.913607	0.00558774	0.673559	0.245162	0.451664	0.218182	0.440723	0.247585	0.663797	0.017789	1.02581	0.162476	1.21914	0.15179	1.1102	0.0956691	1.1167	0.103845	1.11672	0.0432939	1.32333	0.236913	1.23296	0.204683	1.08299	0.192614	1.09751	0.0287972	0.615792	0.11853	0.628544	0.099032	0.559985	0.00180052	0.863119	0.130194	0.871869
PMM0718	PMED4_07931	possible Bacterial regulatory proteins, crp fa	10.2378	0.152063	0	0.597275	18	1	10.0 Regulatory functions	10.0 Regulatory functions	1.01503	0.214948	0.880849	0.0680398	0.881997	0.0488128	0.831884	0.126445	1.03736	0.122293	0.823955	0.0579643	0.948521	0.183843	1.0471	0.0357547	0.96415	0.303562	1.01447	0.0423651	1.03067	0.324321	0.955808	0.0331782	0.96092	0.152953	0.92283	0.176091	0.980214	0.00757205	0.859426	0.12431	1.08465	0.0205359	0.958297	0.145863	1.19224	0.275932	1.09029
PMM0719	PMED4_07941	hypothetical	16.5436	0	18	0.946298	5	0.900038	16.0 Hypothetical	16.2 No similarity	0.383452	0.0722374	0.491787	0.159641	1.03792	0.0711336	1.48609	0.184784	1.37995	0.637453	1.78396	0.046136	1.61365	0.385034	1.25812	0.0520308	0.919079	0.0688317	0.733434	0.0687837	0.493171	0.121088	0.344573	0.0248974	0.430853	0.12451	0.706449	0.000410316	1.41059	0.0856111	2.18069	0.432198	2.12722	0.0946581	1.94871	0.194412	1.74932	0.277696	1.40668
PMM0720	PMED4_07961	possible Poly A polymerase regulatory subunit	11.5374	0.0776804	23	0.666433	9	0.503962	12.0 Transcription	12.2 RNA synthesis, modification, and DNA transcription	1.09652	0.340505	0.945916	0.00537299	0.963087	0.0657084	0.901794	0.080221	0.909785	0.201794	0.980953	0.278218	1.0669	0.0480737	1.09557	0.10871	1.11971	0.0108141	1.05831	0.126002	1.00117	0.194953	0.946038	0.0104967	1.04584	0.172557	0.885195	0.0975441	0.968133	0.175407	1.03783	0.14657	0.965	0.0787955	0.971732	0.072295	1.16215	0.19245	1.22436
PMM0721	PMED4_07971	possible Myosin N-terminal SH3-like domain	9.55844	0.200593	3.2	0.56102	18	1	10.0 Regulatory functions	10.0 Regulatory functions	1.12583	0.0719409	0.917037	0.0475391	1.00854	0.0915363	0.888179	0.0878752	0.928181	0.13659	0.917218	0.0727714	0.997396	0.0856807	0.935538	0.0366765	0.990725	0.0158187	1.0329	0.0501947	1.10058	0.241082	1.08673	0.136363	1.03298	0.0399193	0.810198	0.0158316	0.987797	0.0745492	1.05966	0.0211796	0.872611	0.166026	0.972342	0.0782085	1.00356	0.0736012	1.04191
PMM0722	PMED4_07981	hypothetical	14.6317	0.00463215	2.4	0.861718	11	0.63905	16.0 Hypothetical	16.2 No similarity	1.34451	0.15888	0.817955	0.179758	0.681147	0.0883259	0.570322	0.00235105	0.514818	0.127727	0.867432	0.0497296	1.03827	0.0838311	1.21574	0.0196581	1.14884	0.126224	1.23433	0.0595091	1.21285	0.0138615	1.18021	0.0366449	0.972523	0.175424	0.959425	0.0989245	0.831754	0.0330687	0.768182	0.0206361	0.686303	0.0625864	0.801738	0.00853764	0.985542	0.125156	1.0883
PMM0723	PMED4_07991	pstC,phoW putative phosphate ABC transporter	15.7372	0.000343053	19.8	0.892299	7	0.789692	14.0 Transport and binding proteins	14.0 Transport and binding proteins	0.903263	0.375852	0.621012	0.00822077	0.999969	0.0110775	1.12209	0.310297	1.15698	0.187559	1.34153	0.126653	1.53805	0.175246	1.42932	0.232384	1.12176	0.0601479	0.902821	0.0992988	0.844322	0.278718	0.711383	0.0413258	0.79033	0.248202	0.634142	0.0842749	0.90343	0.238498	0.857648	0.0218447	1.11177	0.0644395	1.1084	0.101306	1.32456	0.0534405	1.07841
PMM0724	PMED4_08001	pstA,phoT putative phosphate ABC transporter	14.8278	0.00373281	21.6	0.845067	9	0.795724	14.0 Transport and binding proteins	14.0 Transport and binding proteins	0.980317	0.170005	0.706945	0.00684717	0.970671	0.0369149	0.860687	0.203228	0.998852	0.0979268	1.27557	0.152858	1.57234	0.285834	1.50984	0.144161	1.22508	0.0864148	1.04446	0.0600471	1.04896	0.16628	0.855217	0.123186	0.952265	0.0165873	0.627685	0.117376	0.872299	0.0642678	0.919935	0.0708208	1.03649	0.166603	1.04867	0.01528	1.40216	0.0269291	1.47797
PMM0725	PMED4_08011	putative phosphate ABC transporter, ATP bindingsubunit	16.2612	0.000292398	20.8	0.923483	7	0.76751	14.0 Transport and binding proteins	14.0 Transport and binding proteins	0.603678	0.0589804	0.382558	0.00837251	0.571786	0.163062	0.85377	0.179475	1.2262	0.109467	2.07703	0.0929216	1.929	0.271623	1.68753	0.16848	1.29414	0.0446606	0.953923	0.0515323	0.950034	0.0809989	0.764282	0.153226	0.593073	0.0436624	0.451276	0.0953854	0.618257	0.105277	1.13529	0.155842	1.36796	0.462437	2.0213	0.245987	2.24304	0.356457	1.71496
PMM0726	PMED4_08031	hypothetical	16.9383	0	19.8	0.960333	7	0.960682	16.0 Hypothetical	16.2 No similarity	0.454337	0.036888	0.353169	0.133096	0.55313	0.0107872	1.00915	0.106504	1.58074	0.435633	4.03348	0.537985	3.55912	0.906948	2.2607	0.0700196	1.34647	0.0779748	0.960703	0.204125	0.7615	0.112726	0.630746	0.00165249	0.455371	0.0295161	0.389074	0.00519127	0.661163	0.02917	1.25446	0.361675	2.45258	1.09798	4.0242	0.88167	3.66807	0.304501	2.22321
PMM0727	PMED4_08041	Serine/threonine specific protein phosphatase	12.9526	0.0268414	16.4	0.751811	5	0.460237	10.0 Regulatory functions	10.0 Regulatory functions	0.888056	0.314016	0.904061	0.0177671	1.07939	0.121346	1.00691	0.0248767	0.944312	0.251396	1.18074	0.0670231	1.04793	0.0579589	0.912289	0.116098	0.829878	0.153569	0.885693	0.223772	0.954185	0.183572	0.852405	0.0990473	0.860926	0.0154529	0.77116	0.01972	1.28467	0.103654	1.28975	0.184313	1.24554	0.0315377	1.14738	0.0614056	1.19648	0.0315653	0.956694
PMM0728	PMED4_08051	DEAD/DEAH box helicase	12.0459	0.0572376	2.8	0.708554	12	0.637456	12.0 Transcription	12.2 RNA synthesis, modification, and DNA transcription	1.1486	0.291104	0.863373	0.0374188	0.973143	0.101975	0.891371	0.00938021	0.901047	0.0425779	0.92317	0.059663	0.99515	0.0178619	1.07405	0.120019	1.00532	0.0710257	1.02087	0.0871816	1.11889	0.348413	1.10358	0.0659473	1.15381	0.145237	0.953071	0.018517	0.941442	0.15304	0.968468	0.0286602	1.05923	0.153804	0.990525	0.0783932	1.13569	0.262521	1.06076
PMM0729	PMED4_08061	possible ATP-dependent DNA ligase	3.45229	0.811824	6.4	0.196924	18	1	11.0 DNA replication, recombination, and repair	11.0 DNA replication, recombination, and repair	1.03985	0.0488752	0.986549	0.0302012	0.964276	0.0262202	1.02697	0.0257882	0.980149	0.182324	0.831751	0.060855	0.89844	0.0288967	1.13762	0.178329	0.97998	0.18949	0.995567	0.251678	1.00488	0.130352	0.963206	0.0182097	1.03409	0.196477	0.976861	0.127311	1.10823	0.244222	1.0194	0.124843	0.947645	0.115661	1.01275	0.0517502	1.03827	0.146096	0.992741
PMM0730	PMED4_08071	conserved hypothetical protein	5.97732	0.552276	10.2	0.34242	18	1	16.0 Hypothetical	16.1 Conserved hypothetical protein	1.17823	0.028213	0.803324	0.0349734	1.06959	0.107463	0.861547	0.155148	0.94823	0.0787295	0.997303	0.023985	0.931361	0.0066813	0.929212	0.0780241	0.972582	0.0945921	0.950746	0.255603	0.943442	0.134156	0.899945	0.0159145	1.25767	0.151202	0.965243	0.0791266	1.24208	0.146445	0.978208	0.0354385	1.38384	0.136604	0.979072	0.219656	0.933325	0.117912	0.917014
PMM0731	PMED4_08081	possible COMC family	10.7675	0.118483	11.6	0.625438	18	1	15.0 Other categories	15.7 Other	1.54423	0.0446856	0.916693	0.0213329	1.0753	0.288807	0.814294	0.146499	1.17133	0.0344246	0.893415	0.114961	0.698676	0.149704	0.799801	0.145802	0.788768	0.136884	0.779275	0.0879783	0.895618	0.267624	1.03451	0.313446	1.17601	0.297937	1.90627	0.204013	1.80052	0.12309	1.9363	0.0722784	2.18513	1.06252	1.06606	0.0714686	0.75251	0.0108611	0.838771
PMM0732	PMED4_08091	possible Major surface glycoprotein	12.8697	0.0288615	7	0.731342	2	0.237411	15.0 Other categories	15.7 Other	1.26133	0.437674	1.07129	0.292227	0.712917	0.105883	0.595302	0.312821	0.476588	0.252564	0.765476	0.133818	0.694214	0.299088	0.919195	0.118094	0.789162	0.186133	1.1524	0.191731	1.24147	0.0267549	1.49243	0.0121642	1.51582	0.440456	1.33827	0.337491	1.46476	0.00883067	1.39133	0.00753413	0.947862	0.0208507	0.879477	0.0524326	0.801183	0.195077	1.0183
PMM0733	PMED4_08101	conserved hypothetical protein	15.6691	0.000316456	18.2	0.89497	6	0.891136	16.0 Hypothetical	16.1 Conserved hypothetical protein	0.849019	0.0124865	0.660179	0.17696	0.899738	0.257053	0.949322	0.105694	1.17344	0.358227	1.73226	0.400654	1.39095	0.188067	1.16325	0.00710862	0.900345	0.10547	0.804397	0.113484	0.820239	0.144639	0.747984	0.037145	0.728384	0.0179167	0.672424	0.0543541	1.06921	0.0293985	1.70017	0.146803	1.90889	0.642734	2.02799	0.392163	1.60595	0.0341046	1.29698
PMM0734	PMED4_08111	possible Helix-turn-helix protein, copG family	12.2989	0.0483152	20	0.697285	8	0.43987	10.0 Regulatory functions	10.0 Regulatory functions	0.962413	0.31998	0.625179	0.141617	0.563759	0.15873	0.663072	0.082146	0.814029	0.260807	1.7954	0.307493	1.31066	0.306119	1.11618	0.117642	0.767109	0.157005	0.84516	0.00062495	1.0084	0.051912	0.958722	0.099169	0.797649	0.242897	0.777812	0.204655	0.873744	0.0445339	1.17305	0.0752094	1.57537	0.340203	1.92804	0.275287	1.50679	0.218634	1.2458
PMM0735	PMED4_08121	hypothetical	10.2525	0.151348	12.4	0.599774	18	1	16.0 Hypothetical	16.2 No similarity	1.18814	0.157609	1.04806	0.0267421	0.990398	0.358007	1.06827	0.108953	0.826833	0.589001	1.04225	0.113412	1.02432	0.0837036	0.995184	0.0869922	0.842657	0.191816	0.991028	0.138557	0.982745	0.00404602	1.04456	0.0395862	1.04865	0.0567228	1.02944	0.0639084	1.42925	0.0187111	1.19609	0.231819	0.900504	0.111292	0.777004	0.155894	0.994428	0.0160927	0.76496
PMM0736	PMED4_08181	possible Alpha-2-macroglobulin family N-termin	7.61641	0.379549	18.8	0.433272	17	1	15.0 Other categories	15.7 Other	0.949584	0.0198806	0.84562	0.122355	0.97012	0.263431	0.971787	0.255458	0.724706	0.439734	1.02546	0.00850171	1.08484	0.0921272	1.19342	0.0264524	1.11244	0.0411252	1.07878	0.0465436	0.966546	0.0455378	0.967042	0.0120119	0.878557	0.180711	0.974245	0.0353901	1.05953	0.130887	1.20267	0.106386	0.978967	0.094381	0.959835	0.0833168	0.876495	0.0401437	0.99998
PMM0737	PMED4_08201	hypothetical membrane protein	16.2364	0.000280112	19.2	0.922097	6	0.688756	16.0 Hypothetical	16.2 No similarity	0.61056	0.122857	0.424392	0.107103	0.704956	0.157836	1.2333	0.331406	1.0143	0.744713	2.0439	0.0382656	1.89445	0.855327	1.57031	0.0485493	1.16404	0.293285	0.896041	0.0657503	0.79418	0.0297619	0.565836	0.0999142	0.407265	0.129101	0.399716	0.112169	1.03926	0.245879	1.95753	0.336797	1.82581	0.672678	1.6612	0.483192	1.77241	0.517531	1.3757
PMM0738	PMED4_08211	conserved hypothetical	16.4875	0	17.8	0.945238	5	0.990199	16.0 Hypothetical	16.1 Conserved hypothetical protein	0.508526	0.0591323	0.502243	0.175772	0.928466	0.414758	1.344	0.416138	1.4678	0.855037	2.45367	0.386163	1.7502	0.422479	1.5273	0.332258	0.982189	0.0228126	0.811119	0.19849	0.696952	0.0102324	0.589752	0.0258239	0.606682	0.117414	0.747182	0.0394024	1.77091	0.0143354	2.64613	0.0757955	2.69454	0.499977	2.33877	0.141003	1.98639	0.00421348	1.44234
PMM0739	PMED4_08231	conserved hypothetical protein	9.29441	0.221775	7.4	0.527423	18	1	16.0 Hypothetical	16.1 Conserved hypothetical protein	1.48016	0.443554	0.905117	0.0113188	0.834742	0.0830809	0.61371	0.101826	0.656164	0.238595	0.877414	0.0190314	1.05079	0.379836	1.04704	0.175812	0.874526	0.167394	1.00002	0.00547077	0.997792	0.0713047	1.16671	0.0633866	1.65494	0.846588	1.29506	0.0984277	1.27326	0.0864247	1.29036	0.0448544	0.984004	0.0533229	0.864675	0.124891	0.906154	0.0927116	0.956111
PMM0740	PMED4_08241	petN Cytochrome b6-f complex subunit VIII	15.5194	0.000573888	13.8	0.913964	3	0.960874	8.0 Photosynthesis and respiration	8.3 Cytochrome b6/f complex	1.03524	0.0348005	1.20364	0.154502	1.2575	0.0773622	1.26282	0.00606285	1.18249	0.0670562	1.26692	0.0182477	1.01129	0.041851	0.912254	0.0110004	0.779302	0.110683	0.820887	0.0321589	0.851734	0.0901638	0.962453	0.0182156	1.07999	0.134847	1.1597	0.0583027	1.27386	0.0201618	1.29541	0.0648715	1.12292	0.077856	1.07237	0.0375763	0.888216	0.0580509	0.784688
PMM0741	PMED4_08261	conserved hypothetical protein	16.3665	0.00034965	5.2	0.943536	16	0.993923	16.0 Hypothetical	16.1 Conserved hypothetical protein	1.50077	0.363449	1.43765	0.270402	1.03075	0.229899	0.545413	0.0119367	0.354859	0.0992637	0.534954	0.0432833	0.728225	0.227809	0.951524	0.0736789	1.10827	0.239306	1.32156	0.229974	1.69555	0.0911224	1.77928	0.233522	1.50112	0.29737	1.08077	0.345546	0.868992	0.199083	0.561258	0.0756623	0.372709	0.100023	0.404542	0.0951982	0.638538	0.145713	0.771213
PMM0742	PMED4_08271	clpP1 Clp protease subunit	16.7865	0	17	0.968591	5	0.615829	13.0 Translation	13.3 Degradation of proteins, peptides, and glycopeptides	0.776774	0.134662	0.890271	0.0265283	1.09092	0.108319	1.20578	0.020349	1.47019	0.0991772	1.90601	0.0112749	1.38861	0.0704804	1.08458	0.0680314	0.707455	0.155784	0.691713	0.0577796	0.657985	0.00781362	0.618445	0.0907742	0.858649	0.152413	0.867669	0.135034	1.13713	0.115721	1.36042	0.116524	1.62844	0.499486	1.76039	0.169089	1.53243	0.0975663	1.20191
PMM0743	PMED4_08281	ftsH1 FtsH ATP-dependent protease homolog	16.6048	0	6.2	0.948362	16	0.983676	4.0 Cellular processes	4.1 Cell division	1.46595	0.197934	1.3886	0.0721799	1.05444	0.105659	0.579932	0.0656376	0.388177	0.0732775	0.369321	0.00747455	0.490427	0.0237986	0.711522	0.0841211	0.865558	0.0355301	1.02163	0.114435	1.16396	0.0415991	1.22715	0.0452116	1.44295	0.116668	1.23657	0.0826531	1.04346	0.0371605	0.688697	0.0343152	0.535032	0.000224022	0.384328	0.0195689	0.486287	0.0513002	0.742922
PMM0744	PMED4_08291	conserved hypothetical protein	12.9205	0.0275948	3.6	0.756155	13	0.46455	16.0 Hypothetical	16.1 Conserved hypothetical protein	1.17591	0.233904	1.01656	0.174404	0.810531	0.173829	0.657864	0.0504007	0.601749	0.15003	0.913279	0.0455629	1.06814	0.127585	1.16802	0.0641032	1.03786	0.292043	1.05603	0.0657291	1.31872	0.00615203	1.33982	0.265192	1.20135	0.401272	0.954567	0.252225	0.951951	0.0376125	0.908935	0.0927326	0.8229	0.298814	0.805297	0.169358	0.996564	0.0679297	1.15369
PMM0745	PMED4_08301	Insulinase family (Peptidase family M16)	13.278	0.0206715	22.6	0.763764	8	0.471137	15.0 Other categories	15.7 Other	0.802708	0.0675144	0.608804	0.0767371	0.643999	0.203129	0.777878	0.210519	0.838463	0.0417541	1.24205	0.237476	1.12027	0.532429	1.15895	0.142366	1.15657	0.344604	1.05272	0.174127	1.00857	0.094627	0.971199	0.0365006	0.910264	0.0899579	0.745376	0.0609041	0.955956	0.073848	1.18861	0.0178172	1.05994	0.0961716	1.38129	0.237846	1.58715	0.505661	1.73427
PMM0746	PMED4_08311	Possible Zn-dependent peptidase	15.2703	0.000853659	22.2	0.875465	9	0.475522	15.0 Other categories	15.7 Other	0.723991	0.155592	0.567174	0.0777709	0.707074	0.139479	0.686413	0.258124	0.836121	0.0270791	1.19804	0.221564	1.24386	0.402454	1.34855	0.375609	1.30993	0.165139	1.02017	0.0431879	1.02694	0.00596592	0.816827	0.0678767	0.749324	0.0911754	0.714998	0.0260054	0.767085	0.0489446	1.13679	0.0391293	1.12726	0.184426	1.3487	0.164191	1.53885	0.141187	1.72759
PMM0747	PMED4_08321	pcyA ferredoxin-dependent biliverdin reductase	16.3135	0.000315457	3	0.958574	13	0.972122	2.0 Biosynthesis of cofactors, prosthetic groups, and carriers	2.3 Cobalamin, heme, phycobilin and porphyrin	1.21243	0.158595	0.736053	0.0959909	0.581516	0.149282	0.411674	0.0456362	0.394641	0.0609241	0.431096	0.0209119	0.848192	0.194851	1.35663	0.0715727	1.41999	0.164663	1.56148	0.0132121	1.71131	0.212717	1.345	0.0403642	1.0743	0.335417	0.728943	0.144631	0.604345	0.0528213	0.4447	0.0288592	0.380375	0.0106005	0.380691	0.0852907	0.706205	0.0828446	1.12792
PMM0748	PMED4_08331	possible ABC transporter component	15.7043	0.000328947	2	0.925035	11	0.709971	14.0 Transport and binding proteins	14.0 Transport and binding proteins	1.22415	0.206022	0.670713	0.0242388	0.532351	0.0525634	0.470745	0.0219549	0.494474	0.104556	0.701543	0.0169589	0.956952	0.206251	1.21992	0.276773	1.16082	0.127487	1.20213	0.0984593	1.21704	0.101129	1.16974	0.164811	0.891307	0.351249	0.658448	0.079428	0.701308	0.119339	0.660012	0.02712	0.573794	0.0941218	0.663087	0.0148895	0.910598	0.117835	1.26091
PMM0749	PMED4_08341	ABC-transporter, membrane spanning component	14.9451	0.00293194	2.4	0.880032	13	0.582655	14.0 Transport and binding proteins	14.0 Transport and binding proteins	1.31703	0.117132	0.855145	0.124448	0.953199	0.00968484	0.752343	0.287646	0.683493	0.0603361	0.757832	0.0929109	1.14399	0.195606	1.20218	0.0781831	1.34833	0.137061	1.28135	0.0869649	1.30544	0.0787224	1.21478	0.147742	1.05229	0.0765335	0.808259	0.196789	0.815651	0.032632	0.694368	0.0202141	0.60754	0.0173937	0.6843	0.00401572	0.961741	0.101376	1.20195
PMM0750	PMED4_08351	ABC transporter, ATP-binding component	13.5179	0.0166205	1.4	0.795689	11	0.797968	14.0 Transport and binding proteins	14.0 Transport and binding proteins	1.28271	0.0161838	0.834506	0.0793514	0.722346	0.23488	0.692349	0.0778342	0.675756	0.111274	0.905647	0.0297359	1.16123	0.228104	1.40481	0.232645	1.33617	0.0558559	1.2436	0.136023	1.04402	0.0839445	1.12234	0.113915	0.967609	0.117347	0.85062	0.0702076	0.992581	0.0205039	0.928892	0.0876213	0.875142	0.0400814	0.818278	0.0192797	1.09832	0.132764	1.10576
PMM0751	PMED4_08361	conserved hypothetical protein	15.9285	0.000419287	4	0.929031	13	0.959865	16.0 Hypothetical	16.1 Conserved hypothetical protein	1.12908	0.384691	0.908032	0.0408772	0.549221	0.150497	0.356228	0.165738	0.206031	0.156379	0.40068	0.0137936	0.707799	0.250903	1.2413	0.141121	1.39187	0.0697807	1.50188	0.443315	1.32546	0.25462	1.43704	0.0464208	1.20952	0.201234	1.03829	0.0523151	0.725049	0.0446062	0.514823	0.0795459	0.363931	0.0480214	0.376001	0.0322577	0.569994	0.0439924	1.00158
PMM0752	PMED4_08371	Glycosyl transferase, family 2	15.9127	0.000409836	3	0.934341	13	0.963244	15.0 Other categories	15.7 Other	1.56444	0.561419	0.738151	0.167364	0.569577	0.0911313	0.478243	0.0239253	0.396012	0.0306185	0.533705	0.116462	0.870062	0.186094	1.21155	0.0324241	1.18172	0.170611	1.38132	0.0405453	1.38898	0.0677928	1.23482	0.162828	1.03946	0.298925	0.846472	0.23782	0.656208	0.0594561	0.512995	0.0128944	0.456446	0.0832215	0.477636	0.0439437	0.791175	0.0521957	1.17743
PMM0753	PMED4_08381	rps2, rpsB 30S ribosomal protein S2	13.9142	0.010962	3	0.817699	13	0.982098	13.0 Translation	13.2 Ribosomal proteins	1.16645	0.0957202	1.03391	0.00779353	0.819595	0.0537912	0.459488	0.0372802	0.302977	0.0726117	0.509845	0.0193897	1.17942	0.126688	1.46026	0.202565	1.44308	0.18314	1.18301	0.104141	1.03961	0.0715498	1.04448	0.064433	0.97305	0.0905618	0.949133	0.00453346	0.739332	0.0726714	0.423178	0.0254636	0.325946	0.0384513	0.437508	0.0249185	0.874001	0.0615354	1.20788
PMM0754	PMED4_08391	tsf putative Elongation factor Ts	15.5781	0.000451128	3.2	0.913595	13	0.999567	13.0 Translation	13.5 Protein modification and translation factors	1.26825	0.420662	1.02297	0.147871	0.563522	0.0543994	0.275815	0.0395994	0.170539	0.0780472	0.40098	0.00631289	0.714288	0.219253	1.16668	0.119761	1.18568	0.306071	1.22858	0.0341795	1.27832	0.00228352	1.20185	0.132608	0.964999	0.290153	0.771479	0.239978	0.596299	0.0611773	0.410133	0.00110467	0.276439	0.0565029	0.40317	0.0944361	0.709602	0.110871	1.18684
PMM0755	PMED4_08401	possible Adenylate cyclase	14.2537	0.00746148	1.4	0.839078	11	0.772874	15.0 Other categories	15.7 Other	1.27118	0.222097	0.716373	0.254989	0.60787	0.0228404	0.726184	0.190216	0.622095	0.101222	0.778724	0.0464365	1.13427	0.519219	1.24091	0.0765482	1.29647	0.192373	1.02097	0.00442779	1.11497	0.134673	1.16658	0.135301	1.08914	0.25424	0.771931	0.240545	0.723373	0.0231978	0.809403	0.0422791	0.87494	0.0311091	0.785219	0.0509989	1.12721	0.172378	1.4294
PMM0756	PMED4_08411	recG ATP-dependent DNA helicase recG	14.4122	0.00623946	2.6	0.848361	12	0.577613	11.0 DNA replication, recombination, and repair	11.0 DNA replication, recombination, and repair	1.16766	0.0470822	0.858815	0.0406061	0.882058	0.0133943	0.747168	0.034283	0.716946	0.172541	0.856259	0.0648142	0.983257	0.0114452	1.07045	0.0965246	1.16554	0.0316279	1.05946	0.113495	1.1791	0.286272	1.05381	0.0192385	1.12347	0.000721294	0.915077	0.0557328	0.983257	0.189644	0.861209	0.0636439	0.794891	0.135059	0.845094	0.0327766	1.02198	0.101228	1.14511
PMM0757	PMED4_08421	D-ala-D-ala dipeptidase	13.2813	0.0204351	20.2	0.753135	8	0.832942	3.0 Cell envelope	3.2 Murein sacculus and peptidoglycan	0.899507	0.198597	0.51522	0.0104991	0.741944	0.133583	0.701085	0.0624893	0.79902	0.321495	1.24427	0.0552138	1.26722	0.0911268	1.17017	0.0740205	0.894479	0.0778439	0.859824	0.185114	0.919649	0.232728	0.784828	0.121154	0.782076	0.119263	0.749405	0.0772646	0.904884	0.0646402	1.15504	0.00248236	1.38341	0.281729	1.51385	0.0644679	1.40161	0.0638806	1.20604
PMM0758	PMED4_08431	sir Ferredoxin-sulfite reductase	16.0959	0.000497512	19	0.914766	6	0.639204	1.0 Amino acid biosynthesis	1.5 Serine family / Sulfur assimilation	0.664278	0.074021	0.716712	0.103455	0.83404	0.112421	0.858422	2.86544e-05	0.944733	0.304863	1.52377	0.153536	1.48868	0.512873	1.36185	0.0419824	1.05596	0.0277752	0.945282	0.0179994	0.765864	0.0202836	0.53704	0.000460839	0.728587	0.0703683	0.942619	0.0292039	1.1328	0.0600885	1.43059	0.116116	1.59251	0.248434	1.93797	0.0194434	1.84854	0.203274	1.66255
PMM0759	PMED4_08441	glyS Glycyl-tRNA synthetase beta subunit	14.3801	0.00654362	3.6	0.841531	12	0.496301	13.0 Translation	13.1 Aminoacyl tRNA synthetases and tRNA modification	1.054	0.127377	1.07331	0.131226	0.945333	0.160486	0.715477	0.105614	0.565765	0.215538	0.829448	6.96244e-05	0.870078	0.19855	0.927535	0.189477	1.05886	0.13894	1.165	0.100242	1.25707	0.0400451	1.13604	0.279925	0.971876	0.254141	0.978304	0.0356743	1.00448	0.0118327	0.935164	0.0309926	0.834423	0.110128	0.801383	0.0432693	0.897408	0.252765	0.965929
PMM0760	PMED4_08451	chlP Aromatic-ring hydroxylase (flavoproteinmonooxygenase)	15.939	0.000422833	16	0.928942	4	0.928001	2.0 Biosynthesis of cofactors, prosthetic groups, and carriers	2.3 Cobalamin, heme, phycobilin and porphyrin	0.950367	0.00113367	1.18694	0.129973	1.32359	0.0441986	1.19266	0.0440973	0.994109	0.34905	1.27246	0.0496565	1.15132	0.186357	1.02854	0.0760115	0.846964	0.00105838	0.736679	0.0903334	0.722981	0.0461075	0.705675	0.0426126	0.820952	0.0539089	1.0387	0.104297	1.12807	0.00964678	1.25631	0.0985359	1.18902	0.0323211	1.33214	0.0464208	1.21851	0.00587318	1.02674
PMM0761	PMED4_08461	putative carboxypeptidase	14.4862	0.00576592	18.6	0.824657	6	0.571859	10.0 Regulatory functions	10.0 Regulatory functions	1.07906	0.255794	0.944407	0.0771538	0.971864	0.119535	0.855255	0.012653	1.09014	0.198082	1.391	0.0231809	1.24897	0.403488	1.15553	0.125821	1.01588	0.222279	0.877318	0.196681	0.894038	0.127688	0.664426	0.0384215	0.899791	0.11555	0.798295	0.0848662	0.981793	0.149467	1.15959	0.07504	1.43148	0.166919	1.28543	0.147226	1.4743	0.12185	1.25495
PMM0762	PMED4_08471	typA / bipA tyrosine binding protein	15.9995	0.000445434	4.2	0.931089	15	0.778917	1.0 Amino acid biosynthesis	1.1 Aromatic amino acid family	1.18164	0.124023	1.03764	0.0607144	0.851743	0.0417486	0.596255	0.090714	0.433258	0.12316	0.604716	0.00694613	0.744468	0.137519	0.941365	0.0674568	1.08864	0.137879	1.19183	0.0480894	1.24135	0.0708632	1.22272	0.142956	1.13306	0.180354	1.02064	0.104095	0.891669	0.0161293	0.760709	0.0657323	0.632401	0.00846472	0.676001	0.00761358	0.791783	0.120462	1.01718
PMM0763	PMED4_08481	conserved hypothetical protein	12.9343	0.0272105	3	0.759949	13	0.402475	16.0 Hypothetical	16.1 Conserved hypothetical protein	1.64588	0.036504	0.935096	0.0845094	0.602402	0.286948	0.48042	0.247579	0.501237	0.41492	0.852074	0.224126	1.08245	0.254922	1.33097	0.16516	1.26454	0.0648373	1.0973	0.161136	1.17516	0.0482797	1.21266	0.0733736	1.20733	0.212786	0.925173	0.0529235	0.89991	0.0700104	0.78587	0.0604005	0.605077	0.130408	0.834531	0.0262004	0.945769	0.10617	1.0611
PMM0764	PMED4_08491	possible ABC transporter, ATP binding component	12.4881	0.0405217	1.2	0.734135	11	0.709128	14.0 Transport and binding proteins	14.0 Transport and binding proteins	1.37712	0.121103	0.841726	0.189817	0.721398	0.0234594	0.642917	0.115841	0.768816	0.187639	0.953785	0.0413305	1.19319	0.190247	1.04512	0.118649	1.1455	0.0258376	1.06433	0.174895	1.14774	0.265516	1.05894	0.11751	1.014	0.332126	0.90255	0.13914	0.861479	0.0708138	1.00658	0.0524976	0.821996	0.224637	0.985391	0.147232	1.10368	0.164045	1.30619
PMM0765	PMED4_08501	possible heme transporter	13.6787	0.0145729	19	0.777326	6	0.518798	2.0 Biosynthesis of cofactors, prosthetic groups, and carriers	2.3 Cobalamin, heme, phycobilin and porphyrin	0.865972	0.0553069	0.707719	0.211308	0.857146	0.322777	1.1225	0.459341	1.24893	0.418963	1.13625	0.0431963	1.11776	0.116545	1.07626	0.0266354	0.87359	0.0418697	0.760184	0.115611	0.8934	0.0480429	0.800557	0.204806	0.908679	0.181085	0.885713	0.305875	0.953602	0.0350603	1.19964	0.123838	1.10686	0.146172	1.13732	0.0197355	1.15447	0.0468345	1.13646
PMM0766	PMED4_08511	rpe, cbbE Ribulose-phosphate 3-epimerase	16.3465	0.000338983	5	0.943448	16	0.992118	15.0 Other categories	15.7 Other	1.71352	0.0936217	1.37049	0.0172908	1.09505	0.149202	0.561978	0.104348	0.287005	0.0752777	0.324454	0.0480596	0.633992	0.019984	0.849725	0.0783394	1.12919	0.09198	1.42109	0.0969762	1.59264	0.0668218	1.45966	0.0474771	1.18358	0.138696	0.982168	0.0320561	0.883728	0.0646638	0.496231	0.0336688	0.291279	0.00452883	0.325808	0.0219139	0.547083	0.0906002	0.750491
PMM0767	PMED4_08521	glpX, cbbF, fbp Fructose-1,6-bisphosphatase/sedoheptulose-1,7-bisphosphatase	15.4687	0.000696379	5.8	0.886673	16	0.983917	3.0 Cell envelope	3.3 Surface polysaccharides, lipopolysaccharides and antigens	1.56093	0.0597999	1.56067	0.107704	1.21245	0.037828	0.707632	0.0514814	0.336405	0.00885634	0.319473	0.00453454	0.573742	0.0158893	0.780918	0.0606436	1.02002	0.00656214	1.19006	0.0274087	1.22992	0.122811	1.33272	0.132962	1.16283	0.0628017	1.11902	0.0634093	0.906296	0.0795847	0.509315	0.030008	0.274938	0.0181461	0.275685	0.00629139	0.459128	0.0700797	0.652657
PMM0768	PMED4_08531	hemA glutamyl-tRNA reductase	15.8758	0.000386847	5	0.915974	16	0.991612	2.0 Biosynthesis of cofactors, prosthetic groups, and carriers	2.3 Cobalamin, heme, phycobilin and porphyrin	2.12313	0.26593	1.36875	0.179875	1.15421	0.328747	0.659146	0.261363	0.334724	0.0509296	0.442594	0.0703547	0.689207	0.0692932	0.794949	0.0299879	1.19616	0.113605	1.37581	0.0179151	1.47265	0.155852	1.48391	0.243632	1.24733	0.111966	1.04188	0.235837	0.786894	0.0414748	0.501542	0.0688257	0.317172	0.00259393	0.35955	0.0545539	0.527951	0.0700298	0.742775
PMM0769	PMED4_08541	glgC ADP-glucose pyrophosphorylase	16.2474	0.000287356	5.2	0.936573	16	0.977125	15.0 Other categories	15.7 Other	1.37382	0.132795	1.18779	0.263171	0.916799	0.204603	0.482639	0.145147	0.27828	0.0246787	0.326593	0.0017139	0.522287	0.0593192	0.778783	0.115003	0.935156	0.153696	1.07122	0.137671	1.29435	0.0162582	1.36183	0.111904	1.37626	0.219455	1.23065	0.166006	0.892165	0.122329	0.537228	0.014203	0.329162	0.0470487	0.342781	0.0467625	0.577317	0.0662931	0.847763
PMM0770	PMED4_08551	gnd 6-phosphogluconate dehydrogenase	16.9525	0	18	0.969936	5	0.983352	6.0 Energy metabolism	6.3 Pentose phosphate pathway	0.498114	0.0434289	0.367513	0.10488	1.09136	0.158898	2.17119	0.383147	2.23955	0.479512	3.73139	0.308567	2.49458	0.499783	1.52107	0.022535	0.802116	0.0220543	0.558441	0.0554671	0.478814	0.107287	0.36363	0.0118802	0.381475	0.040008	0.357209	0.12875	1.20423	0.124399	2.75565	0.0250221	3.34353	0.200006	3.91196	0.164352	2.94956	0.260035	1.50546
PMM0771	PMED4_08561	Putative 6-phosphogluconolactonase (DevB, Pgl)	16.3485	0.000340136	18.2	0.933854	6	0.843925	15.0 Other categories	15.7 Other	0.824308	0.0925049	0.640797	0.00599873	0.820072	0.115094	1.44107	0.116559	1.57106	0.215563	3.47618	0.584795	2.2875	0.0821723	1.41793	0.109991	0.89611	0.128584	0.761926	0.141199	0.817053	0.502472	0.642285	0.0920779	0.744735	0.334828	0.612239	0.0808121	1.08019	0.587384	1.87244	0.270894	2.31417	0.0444686	2.61184	0.16554	2.76179	0.527592	1.37919
PMM0772	PMED4_08571	conserved hypothetical protein	6.46521	0.499069	2.4	0.380776	17	1	16.0 Hypothetical	16.1 Conserved hypothetical protein	0.798279	0.012033	0.838192	0.0907122	0.95116	0.333635	0.862697	0.164091	0.775007	0.0599458	0.814255	0.129955	0.827851	0.427671	0.878783	0.168309	1.08814	0.13135	0.940482	0.093579	1.01728	0.232878	1.04801	0.068729	1.082	0.237448	0.923942	0.0651472	1.1463	0.261549	1.09965	0.03629	1.0349	0.230016	1.01042	0.0230732	1.09407	0.00439761	0.95747
PMM0773	PMED4_08581	possible Geminivirus coat protein	7.52459	0.388298	0.2	0.439699	18	1	3.0 Cell envelope	3.3 Surface polysaccharides, lipopolysaccharides and antigens	1.08677	0.175675	0.918922	0.134967	0.863668	0.0556965	0.855457	0.0772339	0.802306	0.25471	1.00793	0.002757	1.13753	0.0837777	1.02001	0.450833	1.02656	0.0528147	0.882327	0.170279	1.08632	0.210333	0.95921	0.0845544	1.13657	0.170352	0.964069	0.0514873	0.98251	0.052472	0.966298	0.0053134	1.1389	0.42066	0.981618	0.00158936	1.0674	0.101617	0.962206
PMM0774	PMED4_08591	ilvD Dihydroxy-acid dehydratase	16.5259	0	21	0.939369	8	0.662853	1.0 Amino acid biosynthesis	1.3 Branched chain family	0.728959	0.0052395	0.593846	0.0957573	0.801278	0.0903956	0.885039	0.155515	0.864913	0.11809	1.34401	0.0116294	1.59111	0.222016	1.68423	0.0707835	1.29403	0.0427047	1.11546	0.0757444	0.916025	0.0978975	0.698494	0.00449414	0.608715	0.145821	0.758542	0.061927	0.948292	0.119689	1.09407	0.0939536	1.20055	0.317709	1.4229	0.131183	1.72037	0.149453	1.70285
PMM0775	PMED4_08601	conserved hypothetical	15.2519	0.000844391	0.6	0.894114	10	0.948126	16.0 Hypothetical	16.1 Conserved hypothetical protein	0.877852	0.0936077	0.679284	0.129327	0.650816	0.000782526	0.599621	0.150935	0.609695	0.134571	0.972285	0.0736612	1.08522	0.163468	1.29755	0.0227282	1.33206	0.137878	1.26348	0.203109	1.13419	0.0601404	1.11001	0.00451217	0.90609	0.0603321	0.910429	0.0232794	0.826267	0.135825	0.977386	0.00648624	0.877009	0.0281599	0.973401	0.0499099	1.06722	0.121515	1.3791
PMM0776	PMED4_08611	putative uracil phosphoribosyltransferase	13.9735	0.0104748	0.8	0.820157	10	0.91586	10.0 Regulatory functions	10.0 Regulatory functions	0.799236	0.159453	0.655837	0.0307892	0.625273	0.128829	0.590361	0.14464	0.476708	0.27424	0.802904	0.0882498	1.06305	0.0869656	1.12918	0.119725	1.04005	0.0243306	1.18232	0.194487	1.11101	0.110734	0.900354	0.129994	0.895905	0.0495259	0.747098	0.0864528	0.908961	0.147915	0.960418	0.0868723	0.823447	0.0526879	0.898579	0.0546775	1.06582	0.134583	1.35782
PMM0777	PMED4_08621	conserved hypothetical protein	13.3316	0.0196405	6	0.762342	14	0.4997	16.0 Hypothetical	16.1 Conserved hypothetical protein	1.00947	0.0969812	0.977214	0.236472	1.00121	0.264999	0.797171	0.249306	0.657287	0.0174688	0.767868	0.00991312	0.707048	0.132328	0.814386	0.138964	0.777507	0.184978	0.908959	0.0750485	1.07505	0.0670408	1.08144	0.0873473	1.20846	0.193145	1.0743	0.134515	1.0919	0.108891	1.10174	0.134997	0.883917	0.180224	0.804426	0.0672524	0.791855	0.115002	0.867849
PMM0778	PMED4_08631	cobW putative cobalamin synthesis protein	9.83013	0.181462	4.2	0.57162	17	1	2.0 Biosynthesis of cofactors, prosthetic groups, and carriers	2.3 Cobalamin, heme, phycobilin and porphyrin	1.13617	0.195638	1.11019	0.165138	0.964906	0.0280693	0.666068	0.0691782	0.766867	0.105008	0.840545	0.133027	0.851616	0.193793	0.953736	0.132027	0.961503	0.0990512	0.971902	0.0889482	1.03617	0.041085	1.05486	0.0679673	1.17651	0.275169	1.01435	0.231885	0.940408	0.0268056	0.977056	0.0592887	0.950804	0.101668	0.847157	0.0644099	1.09079	0.122627	1.02122
PMM0779	PMED4_08651	conserved hypothetical protein	16.5206	0	18.4	0.94194	6	0.728872	16.0 Hypothetical	16.1 Conserved hypothetical protein	0.725257	0.013181	0.796469	0.197232	0.759438	0.245085	0.871123	0.171552	0.932035	0.610923	1.84419	0.0150731	1.60951	0.658349	1.46195	0.0951814	0.984561	0.11072	0.922142	0.0278205	0.82589	0.0246744	0.703358	0.0210123	0.642196	0.24259	0.779577	0.28331	1.30311	0.0871784	1.63538	0.275594	1.66446	0.112931	1.64633	0.0872392	1.60614	0.141186	1.37851
PMM0780	PMED4_08661	purQ (purL, pur4) phosphoribosylformylglycinamidine synthase	16.8835	0	18.4	0.962389	6	0.868733	9.0 Purines, pyrimidines, nucleosides, and nucleotides	9.2 Purine ribonucleotide biosynthesis	0.852695	0.12827	0.690448	0.0957946	0.897843	0.0115769	1.21116	0.167799	1.18801	0.421915	1.87495	0.228308	1.78019	0.0376125	1.39836	0.112273	1.07273	0.00555422	0.874843	0.0490581	0.797995	0.13735	0.722959	0.0503036	0.724429	0.0218187	0.730886	0.0697097	1.05227	0.0638274	1.43985	0.123012	1.68666	0.00970094	1.86886	0.243103	1.52328	0.134299	1.22528
PMM0781	PMED4_08671	cbbA,cfxA,fbaA,fda Fructose-bisphosphate/sedoheptulose-1,7-bisphosphate aldolase	15.5893	0.000455235	5.6	0.894015	16	0.986899	7.0 Fatty acid, phospholipid and sterol metabolism	7.0 Fatty acid, phospholipid and sterol metabolism	1.59809	0.0290856	1.53765	0.112707	1.1654	0.0474638	0.626072	0.0823548	0.251048	0.00959309	0.230992	0.000348145	0.495991	0.0231045	0.693336	0.0998879	0.921546	0.108991	1.13636	0.0920074	1.2046	0.0440774	1.26624	0.0286679	1.19241	0.0709214	1.07993	0.12031	0.869989	0.0135637	0.522387	0.0459165	0.238427	0.0145813	0.268145	0.0237686	0.485459	0.0850258	0.682879
PMM0782	PMED4_08681	putative oxidoreductase	15.9508	0.000431965	3.8	0.931746	13	0.895807	10.0 Regulatory functions	10.0 Regulatory functions	1.40572	0.0461599	0.893475	0.146168	0.765977	0.037906	0.46437	0.0350086	0.320605	0.148619	0.480286	0.0379364	0.828002	0.223075	0.996462	0.161484	1.23735	0.0281083	1.34607	0.0664416	1.32477	0.136861	1.35916	0.0834287	1.13217	0.264142	0.95832	0.0598719	0.848606	0.0957953	0.674912	0.0447807	0.476774	0.0778934	0.600385	0.038221	0.787583	0.165357	1.08123
PMM0783	PMED4_08691	conserved hypothetical protein	15.9586	0.00043573	4.8	0.923723	16	0.838609	16.0 Hypothetical	16.1 Conserved hypothetical protein	1.80918	0.201249	1.15272	0.0601764	0.889505	0.16118	0.506378	0.104624	0.318192	0.0893878	0.433364	0.00679823	0.65805	0.107487	0.822751	0.157648	1.06469	0.10989	1.21673	0.0365163	1.22	0.0757048	1.24956	0.0924836	1.15099	0.125569	1.01349	0.0952885	0.83096	0.0386621	0.580897	0.0363387	0.406162	0.00423432	0.496305	0.0288246	0.645094	0.0962128	0.82852
PMM0784	PMED4_08701	accD acetyl-CoA carboxylase, beta subunit	16.6883	0	5	0.962865	16	0.98814	7.0 Fatty acid, phospholipid and sterol metabolism	7.0 Fatty acid, phospholipid and sterol metabolism	1.57161	0.105158	1.11422	0.261766	0.935317	0.167463	0.515341	0.100534	0.378465	0.0819837	0.438319	0.0591017	0.60225	0.0140046	0.786509	0.162695	1.02478	0.117762	1.26232	0.00856119	1.3165	0.116086	1.322	0.0881968	1.19755	0.217666	1.16335	0.0568917	0.873024	0.0821306	0.59546	0.0149859	0.39033	0.0262537	0.422741	0.0438644	0.588827	0.0773476	0.822013
PMM0785	PMED4_08711	prk, cbbP phosphoribulokinase	16.4135	0	6	0.93934	16	0.998068	8.0 Photosynthesis and respiration	8.2 CO2 fixation	1.67701	0.0775373	1.47384	0.095704	1.03832	0.0324111	0.593719	0.0281301	0.269017	0.09375	0.325295	0.0302939	0.540131	0.0725413	0.665406	0.0525318	0.866923	0.191514	1.11995	0.161407	1.22119	0.0188187	1.3473	0.0258189	1.26394	0.133486	1.16612	0.107758	0.902241	0.0475227	0.550357	0.096124	0.317365	0.00381195	0.331085	0.00420204	0.482062	0.115642	0.632027
PMM0786	PMED4_08721	leuB 3-isopropylmalate dehydrogenase	16.6685	0	4.4	0.968836	15	0.578041	1.0 Amino acid biosynthesis	1.3 Branched chain family	1.40347	0.142882	1.05423	0.197456	0.666269	0.18102	0.421544	0.0103265	0.332627	0.207304	0.423516	0.0828398	0.701815	0.00743405	0.916808	0.15975	1.36546	0.00712698	1.42689	0.0782205	1.54245	0.0717653	1.60281	0.0449712	1.32191	0.250356	0.999986	0.00759257	0.759625	0.0711637	0.631768	0.0336876	0.454448	0.0208455	0.425561	0.0239897	0.660599	0.0203612	0.949899
PMM0787	PMED4_08731	lpxD UDP-3-O-[3-hydroxymyristoyl] glucosamineN-acyltransferase	11.5176	0.0780801	2.4	0.678165	12	0.671192	12.0 Transcription	12.1 Degradation of RNA	1.385	0.10503	0.667238	0.161589	0.776415	0.0272495	0.658356	0.0222784	0.611376	0.0302403	0.807118	0.100093	0.978387	0.202288	1.08163	0.174259	1.03753	0.10522	1.10433	0.00194179	1.04205	0.0378824	1.15564	0.053316	1.15338	0.25048	0.952718	0.0335436	0.953113	0.0147393	1.00407	0.064779	0.914453	0.02604	0.951046	0.0797773	1.15874	0.0595505	1.08917
[truncated: 2,828 more rows]
[truncated: 11 more columns]

## Sheet: Sheet2
name	desc
dnaN	DNA polymerase III, beta chain (NCBI)
	conserved hypothetical protein (NCBI)
purL	phosphoribosylformylglycinamidine synthetase II (NCBI)
purF	Glutamine amidotransferase class-II:Phosphoribosyl transferase (NCBI)
	DNA gyrase/topoisomerase IV, subunit A (NCBI)
[truncated: 1,979 more rows]
